# Supplementary material for: Constructing a ceRNA-immunoregulatory network associated with the development and prognosis of human atherosclerosis through weighted gene co-expression network analysis
Source: Aging (Albany NY). 2021 Jan 17;13(2):3080–100. doi: 10.18632/aging.202486 (PMC7880393; doi:10.18632/aging.202486)
Supplement: Supplementary Material 1 [file aging-13-202486-s001.xlsx]

## Sheet: key_50_100_median
Supplementary Material 1. Results of WGCNA.
gene symbol	kTotal	kWithin	kOut	kDiff	MEblue	MEblack	MEmagenta	MEsalmon	MEtan	MElightcyan	MEpink	MEgreenyellow	MEgrey60	MEpurple	MEred	MEgreen	MElightgreen	MEyellow	MEturquoise	MEcyan	MEbrown	MEmidnightblue	MEgrey	moduleColors	GS	type
MMP12	97.7197	41.9274	55.7923	-13.8649	0.079021	-0.441238	-0.290433	0.226093	-0.00336615	0.645891	0.222493	0.452058	0.281849	0.350364	0.769652	0.578789	0.523819	-0.211334	-0.211899	0.126318	-0.743403	-0.391232	0.0375672	red	0.512735	protein_coding
SPP1	142.238	80.0571	62.1805	17.8766	0.0806143	-0.520265	-0.314179	0.305793	-0.035455	0.566962	0.116784	0.227641	0.0465798	0.496615	0.899373	0.653177	0.688507	-0.220073	-0.186531	0.0544518	-0.700839	-0.413096	-0.0823373	red	0.723318	protein_coding
JCHAIN	96.2488	13.7536	82.4952	-68.7416	0.206847	-0.441151	-0.0820479	0.40553	0.296904	0.527641	0.23784	0.331693	0.249543	0.850118	0.655115	0.631642	0.72347	-0.438836	-0.231346	0.154887	-0.657415	-0.186011	-0.271941	purple	0.673285	protein_coding
PPBP	21.2619	3.18773	18.0741	-14.8864	-0.15824	-0.182268	-0.512405	-0.547994	-0.387761	0.510526	0.420066	-0.0751061	-0.028319	-0.401297	0.193728	0.050351	-0.0320248	-0.00460262	0.0412862	-0.00335401	-0.127651	-0.318018	-0.0147317	salmon	0.10677	protein_coding
HLA-DQB1	28.0882	8.78001	19.3082	-10.5282	0.383825	0.298552	0.418683	0.126238	0.143562	-0.229215	-0.456897	0.148808	0.439744	0.18618	0.172998	0.341771	0.072393	0.0354946	-0.381412	-0.0208439	0.0093236	0.0246687	0.0341357	blue	-0.0237065	protein_coding
KDM5D	18.0865	6.588	11.4985	-4.91046	-0.157789	-0.265768	0.117747	0.257369	0.189908	-0.254116	-0.345994	0.106894	0.0215477	0.609559	0.0310593	0.0571231	0.0899383	0.0667398	0.134852	-0.0354559	-0.031668	0.216406	-0.0461119	purple	0.253934	protein_coding
ITLN1	36.1093	14.6701	21.4393	-6.76919	0.00441756	0.335828	0.366702	-0.352002	0.00265761	-0.400168	-0.258263	-0.139075	-0.0302564	-0.126134	-0.551	-0.240806	-0.464943	0.0874881	0.0263198	0.176812	0.627142	0.519428	-0.2696	brown	-0.379037	protein_coding
S100A8	36.1313	13.5442	22.5871	-9.04285	0.212863	-0.046805	-0.281683	0.300426	0.198362	0.571158	0.718328	0.0984613	0.256298	0.14085	0.211599	0.0852861	0.401253	-0.321806	-0.140797	-0.293303	-0.477519	-0.514641	0.23712	pink	0.18414	protein_coding
CCL18	139.65	71.5097	68.1406	3.36904	-0.0466956	-0.589918	-0.443996	0.0767199	-0.245637	0.561197	0.0371056	0.28592	0.199633	0.285261	0.884434	0.665053	0.585792	-0.0353928	-0.193066	-0.00134027	-0.710392	-0.45724	0.0341352	red	0.740393	protein_coding
MMP9	130.004	62.6996	67.3041	-4.60448	-0.0127023	-0.569358	-0.368861	0.222057	-0.011487	0.660836	0.211012	0.395874	0.213165	0.423053	0.842485	0.586351	0.551347	-0.220396	-0.104787	0.132194	-0.766473	-0.371128	-0.0118723	red	0.597003	protein_coding
CHGB	49.3662	10.8249	38.5413	-27.7164	0.0815702	-0.328171	-0.160939	0.464134	0.262621	0.394863	0.315503	0.795481	0.272661	0.142469	0.395608	0.306597	0.438841	-0.338273	-0.0585983	0.160859	-0.701835	-0.234716	0.0615267	greenyellow	0.0851446	protein_coding
HLA-DQA1	32.9697	9.85838	23.1113	-13.2529	0.392885	0.286797	0.391939	0.122644	0.102299	-0.152899	-0.42496	0.181923	0.496938	0.165445	0.233864	0.388573	0.0932275	0.0245462	-0.417502	0.0166058	-0.0464138	-0.0112714	0.0617424	blue	0.010018	protein_coding
CYP4B1	22.0065	3.25635	18.7501	-15.4938	0.269366	0.219532	-0.0549423	-0.109997	0.188844	0.213697	0.337494	0.353749	0.62436	-0.275409	-0.0656692	0.104668	0.0533094	-0.180224	-0.239408	-0.264982	-0.239568	-0.280461	0.183571	grey60	-0.229487	protein_coding
FAM83D	11.3152	2.29643	9.01881	-6.72238	0.0974798	0.189361	0.00396604	-0.37933	-0.1225	-0.0799187	-0.192068	-0.0403786	0.046983	-0.412584	0.0409079	0.103895	-0.0454047	-0.0615028	-0.0595223	0.137833	0.130146	0.00981439	-0.169065	grey	-0.109481	protein_coding
LYZ	115.376	34.0927	81.2831	-47.1904	0.496471	-0.0243055	0.093915	0.110472	0.146064	0.369496	0.000452672	0.333526	0.529359	0.405915	0.690438	0.71803	0.536414	-0.294807	-0.511485	0.0834642	-0.499837	-0.294042	-0.148308	green	0.38476	protein_coding
SELE	87.885	29.156	58.729	-29.573	0.309196	-0.215806	0.0309502	0.350696	0.235901	0.558315	0.184132	0.685896	0.472491	0.357642	0.5463	0.728651	0.558736	-0.440717	-0.383357	0.320976	-0.649188	-0.199963	-0.168663	green	0.282295	protein_coding
CHI3L1	145.385	79.5459	65.8388	13.7071	0.022636	-0.594889	-0.284649	-0.0169828	-0.0125944	0.487851	-0.0416879	0.306798	0.154759	0.493328	0.905025	0.718157	0.586899	-0.220962	-0.145148	0.148513	-0.650576	-0.214145	-0.268687	red	0.697993	protein_coding
RGS1	119.943	52.7572	67.1862	-14.429	0.240248	-0.312341	-0.249391	0.337832	0.0387543	0.583031	0.2382	0.257619	0.230119	0.381807	0.802182	0.6078	0.638469	-0.196795	-0.342827	-0.125383	-0.739217	-0.56064	0.108451	red	0.543386	protein_coding
TCIM	48.0839	6.59772	41.4862	-34.8885	0.280907	-0.0743187	-0.0433361	0.123977	0.0071316	0.613256	0.325685	0.380415	0.388358	0.276645	0.348345	0.54512	0.308382	-0.148299	-0.485622	0.182537	-0.453784	-0.331212	-0.0532025	brown	0.114712	protein_coding
CXCL14	84.8013	36.2619	48.5394	-12.2774	0.376028	-0.11768	0.177265	0.292243	0.325749	0.218019	-0.152189	0.214217	0.681581	0.718948	0.510316	0.7338	0.557229	-0.283254	-0.415225	0.00500098	-0.443132	-0.139335	-0.157251	green	0.495853	protein_coding
CCL19	47.2275	9.90006	37.3275	-27.4274	0.0855768	-0.430368	-0.0615368	0.299598	0.19354	0.289877	0.00847072	-0.141869	-0.0877062	0.789565	0.577148	0.530676	0.626058	-0.283875	-0.147311	0.0229538	-0.396511	-0.029205	-0.374576	purple	0.743855	protein_coding
FCGR2B	180.026	82.4257	97.6005	-15.1748	0.249621	-0.42852	-0.188101	0.268162	0.128718	0.460477	0.0538509	0.273482	0.322937	0.623575	0.89082	0.734093	0.750345	-0.263342	-0.33721	-0.0744503	-0.747781	-0.399256	-0.101902	red	0.722722	protein_coding
ACP5	202.796	113.848	88.9489	24.8986	0.0076296	-0.656002	-0.378819	0.185876	-0.0498385	0.543733	0.062341	0.341498	0.115262	0.458153	0.965136	0.698243	0.698511	-0.226602	-0.113566	0.10245	-0.759055	-0.349881	-0.154304	red	0.747248	protein_coding
EVI2B	111.888	59.8464	52.0418	7.80464	0.216099	-0.394753	-0.281045	0.0936982	0.0566294	0.548827	0.247304	0.26806	0.22245	0.436345	0.822719	0.595565	0.64	-0.297197	-0.261887	-0.0426685	-0.67838	-0.416005	-0.124347	red	0.608308	protein_coding
AQP9	86.3985	51.4025	34.9961	16.4064	-0.129347	-0.580096	-0.511131	-0.124768	-0.252626	0.464064	0.0905881	0.224411	-0.0184686	0.116579	0.811464	0.444948	0.413367	0.00195808	-0.0552988	-0.140942	-0.601668	-0.403681	0.0263616	red	0.57333	protein_coding
MFAP5	71.4407	11.5544	59.8863	-48.332	0.581672	0.360949	0.348241	0.0586689	0.403456	0.101249	0.0102029	0.363724	0.924409	0.170314	0.0851965	0.475429	0.241253	-0.340961	-0.50431	8.38654e-05	-0.220659	-0.0882881	-0.0646652	grey60	-0.0701325	protein_coding
TNFSF13B	136.618	46.8915	89.7261	-42.8346	0.319382	-0.259603	0.00835189	0.288281	0.0663522	0.413964	-0.0907443	0.202405	0.406411	0.688117	0.769726	0.78797	0.637882	-0.17916	-0.458791	0.0479011	-0.556709	-0.311466	-0.0874071	green	0.665802	protein_coding
RARRES1	56.1674	11.0306	45.1368	-34.1062	0.38439	-0.137453	0.0700609	0.367547	0.506265	0.155738	0.0930834	0.112153	0.36865	0.594913	0.406777	0.520666	0.730568	-0.492772	-0.248738	-0.125792	-0.498363	-0.184547	-0.2448	green	0.49959	protein_coding
APOE	114.463	70.2781	44.1845	26.0936	-0.121041	-0.624876	-0.345581	-0.000183027	-0.236166	0.299611	-0.252485	0.191842	0.0413705	0.347338	0.883522	0.625551	0.506468	0.00533632	-0.0363873	0.0205157	-0.52274	-0.246799	-0.10072	red	0.772595	protein_coding
VCAM1	66.9828	27.2428	39.74	-12.4973	0.210025	-0.272037	0.108598	0.297165	0.078694	0.267628	-0.194982	0.242087	0.157	0.547662	0.635628	0.703771	0.546444	-0.278676	-0.268361	0.39238	-0.388087	-0.0107893	-0.344652	green	0.546085	protein_coding
IER3	86.0529	26.8185	59.2344	-32.4159	0.171933	-0.410408	-0.0894559	0.295803	0.059029	0.349723	-0.0685669	0.178794	0.10007	0.530644	0.738911	0.709766	0.696672	-0.299541	-0.218012	0.167474	-0.511255	-0.203053	-0.282672	green	0.708314	protein_coding
PTX3	23.1048	5.45768	17.6471	-12.1894	0.304334	0.0120034	-0.0294152	-0.0142564	0.0541623	0.27491	0.123592	-0.0872262	-0.0981926	0.0985761	0.350604	0.424723	0.410843	-0.272656	-0.340716	0.0538822	-0.222386	-0.194607	-0.361352	green	0.225079	protein_coding
CTSS	213.969	102.558	111.411	-8.85268	0.238578	-0.464464	-0.216449	0.310119	0.117822	0.485666	0.0558165	0.314197	0.289134	0.537818	0.931566	0.785797	0.81949	-0.333209	-0.283637	0.0037957	-0.773035	-0.412943	-0.139959	red	0.759777	protein_coding
ITGB2	189.111	119.538	69.5732	49.9651	0.045431	-0.585658	-0.363297	0.155432	-0.0628159	0.517017	0.0391944	0.233516	0.13588	0.460415	0.971372	0.691514	0.670367	-0.174908	-0.171632	-0.0556531	-0.717081	-0.384538	-0.103671	red	0.787334	protein_coding
GPR34	116.226	37.6625	78.5632	-40.9007	0.315414	-0.352675	-0.1702	0.520949	0.266234	0.451185	0.321166	0.301335	0.110557	0.482114	0.736048	0.541941	0.803629	-0.359783	-0.299087	-0.162596	-0.786023	-0.446303	-0.0494782	red	0.551464	protein_coding
MRC1	170.893	24.57	146.323	-121.753	0.497869	-0.168309	-0.133811	0.432639	0.355142	0.610204	0.476135	0.234219	0.35169	0.503403	0.693611	0.634866	0.844581	-0.498077	-0.455372	-0.154958	-0.790639	-0.538927	-0.0840735	green	0.503881	protein_coding
CXCR4	118.214	65.6964	52.5175	13.1789	0.100004	-0.474845	-0.285434	0.216924	0.0569255	0.521635	0.150334	0.252425	0.21536	0.494983	0.847199	0.584435	0.632199	-0.288161	-0.136624	0.0710296	-0.69751	-0.357861	-0.0716745	red	0.667735	protein_coding
SOST	31.693	9.30678	22.3862	-13.0795	0.283008	0.486067	0.470527	0.0510447	-0.0241696	-0.268134	-0.21772	-0.283029	-0.0273809	0.0206758	-0.292679	-0.0665897	-0.206473	0.0841601	-0.236369	0.25498	0.435985	0.19925	-0.0720687	brown	-0.282335	protein_coding
ADAMDEC1	193.184	98.2112	94.9728	3.23847	0.034077	-0.59484	-0.350047	0.2272	-0.0125914	0.629335	0.145933	0.404552	0.250893	0.479456	0.92795	0.678297	0.644682	-0.22179	-0.179256	0.0939496	-0.810537	-0.364293	-0.0531611	red	0.703385	protein_coding
CYP1B1	227.183	78.6299	148.553	-69.9231	0.518314	-0.159125	-0.0137226	0.346343	0.323605	0.56004	0.200279	0.341999	0.597204	0.533107	0.699982	0.898632	0.840063	-0.480332	-0.562615	-0.0478369	-0.73149	-0.439167	-0.176635	green	0.560418	protein_coding
STC1	12.743	1.78374	10.9592	-9.17551	0.0741303	-0.0181367	-0.00620743	0.0560779	-0.034434	0.254586	-0.0680935	0.230594	0.392309	0.0725389	0.225686	0.342331	0.0852883	0.00209228	-0.224261	0.16242	-0.259731	-0.140454	0.100899	grey	0.0401423	protein_coding
C5AR1	97.9571	57.3682	40.5889	16.7792	0.0536872	-0.380909	-0.43249	-0.0785523	-0.292025	0.617075	0.183254	0.201701	0.0844271	0.0829465	0.825025	0.537427	0.44066	-0.0343703	-0.25069	-0.0242189	-0.610137	-0.52922	0.0580474	red	0.520594	protein_coding
SOX7	193.448	72.6476	120.8	-48.1525	0.57565	0.0680058	0.185566	0.0818172	0.209238	0.42645	0.0114278	0.417364	0.663989	0.332592	0.523529	0.884662	0.552618	-0.349979	-0.685543	0.128873	-0.477971	-0.255426	-0.264608	green	0.276899	protein_coding
FSTL1	112.438	54.3776	58.0606	-3.68295	0.695618	0.536378	0.407064	0.356735	0.43531	0.225201	0.289256	0.291646	0.73188	0.185544	-0.0262968	0.296075	0.219159	-0.313398	-0.61659	-0.0953351	-0.219116	-0.238144	0.138288	blue	-0.243266	protein_coding
IL6	50.2439	25.1804	25.0635	0.116912	0.245547	-0.0774242	-0.00743996	0.0725486	-0.0773377	0.479851	-0.0143245	0.258843	0.467372	0.291993	0.478777	0.68784	0.361674	-0.137248	-0.453326	0.140555	-0.333939	-0.24828	-0.0744698	green	0.363812	protein_coding
C1QC	126.744	74.1248	52.619	21.5058	0.0744188	-0.528542	-0.34646	0.133513	-0.0474851	0.546979	0.150566	0.101336	0.0110968	0.448127	0.8862	0.623007	0.690936	-0.305016	-0.124545	0.205568	-0.637476	-0.315743	-0.259535	red	0.722345	protein_coding
C1QB	157.421	84.8551	72.5664	12.2887	0.119386	-0.530415	-0.397803	0.222892	-0.016511	0.582484	0.22615	0.133509	0.0731113	0.463413	0.899554	0.646635	0.777316	-0.273131	-0.20011	-0.0804911	-0.726103	-0.475201	-0.131611	red	0.784616	protein_coding
SCG2	37.3277	7.39029	29.9374	-22.5471	0.414703	0.122778	0.279663	0.0617693	0.16306	0.222491	-0.100318	0.242759	0.464603	0.406059	0.349029	0.576526	0.307853	-0.323772	-0.416012	0.350291	-0.181159	0.0357951	-0.311083	turquoise	0.206976	protein_coding
SERPINA1	117.536	78.0289	39.5066	38.5224	0.0207092	-0.545039	-0.352665	0.0627615	-0.111553	0.484566	0.047212	0.0570442	0.0440678	0.486566	0.891535	0.608484	0.615115	-0.18138	-0.119911	-0.0192411	-0.563737	-0.322502	-0.172656	red	0.822543	protein_coding
HTR2B	67.4723	30.948	36.5243	-5.57626	0.312904	-0.152223	0.242637	0.15555	0.205639	-0.052112	-0.464264	0.198344	0.370098	0.553943	0.552179	0.711283	0.514756	-0.167477	-0.357759	0.0335843	-0.317974	0.00229482	-0.245035	green	0.509042	protein_coding
CYTIP	137.755	63.7747	73.9807	-10.206	0.205852	-0.384184	-0.268647	0.278759	0.073407	0.587277	0.230214	0.371298	0.368601	0.458877	0.829729	0.610309	0.642866	-0.24116	-0.275235	-0.0861454	-0.769049	-0.516206	0.105734	red	0.59555	protein_coding
BCL2A1	86.0216	35.142	50.8796	-15.7376	-0.124213	-0.599845	-0.574211	0.157863	-0.0694588	0.581009	0.379311	0.223275	0.00591418	0.203252	0.735402	0.31485	0.533634	-0.189348	0.0911894	-0.124376	-0.716958	-0.499715	0.124255	red	0.588955	protein_coding
FCER1G	156.183	96.9055	59.2776	37.6279	0.178437	-0.441444	-0.282803	0.108685	-0.0358483	0.540594	0.121912	0.200278	0.123115	0.412017	0.926144	0.674061	0.66449	-0.258237	-0.257266	0.0516556	-0.662463	-0.371071	-0.179743	red	0.675139	protein_coding
CHI3L2	35.6722	8.99219	26.68	-17.6878	0.022938	-0.461772	-0.0704341	0.311675	0.311795	0.150597	-0.00247703	-0.080814	-0.177816	0.7625	0.505207	0.364326	0.569865	-0.352916	0.0428836	0.106719	-0.379108	0.0706534	-0.428533	purple	0.614297	protein_coding
CD55	210.731	78.2671	132.464	-54.197	0.740835	0.441258	0.404058	0.140965	0.265149	0.296312	0.109784	0.268793	0.746985	0.28337	0.235594	0.594871	0.322272	-0.300014	-0.758797	0.118785	-0.256566	-0.235357	-0.0682495	blue	-0.0292402	protein_coding
CXCL10	8.31199	1.09719	7.2148	-6.11761	0.234338	0.0440327	0.169751	0.183041	0.100244	0.0045159	-0.112718	0.0685047	-0.0812009	-0.0308086	0.245162	0.298524	0.27863	-0.136283	-0.25552	-0.0761768	-0.129591	0.0365733	-0.0888976	grey	0.158729	protein_coding
RNASE6	200.191	86.443	113.748	-27.3052	0.282835	-0.366149	-0.29446	0.230591	0.0506604	0.638435	0.267684	0.340619	0.321459	0.352994	0.887306	0.726065	0.755832	-0.302335	-0.382659	-0.120662	-0.808329	-0.560387	-0.0118162	red	0.647587	protein_coding
CCL2	31.9269	13.4832	18.4437	-4.96045	0.0681567	-0.243467	0.0522739	0.193631	-0.096469	0.254531	-0.260597	0.313628	0.195383	0.327118	0.53567	0.579882	0.318348	-0.0932424	-0.223461	0.31124	-0.284014	0.0120586	-0.142401	green	0.448076	protein_coding
CSF2RB	186.883	77.5099	109.373	-31.8627	0.310956	-0.40151	-0.115159	0.166574	0.124438	0.502906	0.0675924	0.362494	0.317092	0.58186	0.873543	0.827548	0.742242	-0.335308	-0.417789	0.0175853	-0.683718	-0.281088	-0.28302	red	0.70255	protein_coding
ADAMTS5	114.061	8.82785	105.233	-96.405	0.59686	0.202662	0.179629	0.311277	0.451938	0.420714	0.321952	0.310903	0.868351	0.366795	0.250409	0.58463	0.522942	-0.458008	-0.567912	-0.0987258	-0.495261	-0.330312	-0.00315992	grey60	0.168774	protein_coding
LPL	138.519	56.5669	81.952	-25.3851	0.191304	-0.430839	-0.260434	0.308133	0.165822	0.567635	0.265711	0.691433	0.308706	0.216355	0.756466	0.647674	0.667961	-0.35549	-0.247583	0.00164039	-0.84206	-0.411548	-0.0410909	brown	0.415469	protein_coding
THBS1	83.887	19.2446	64.6424	-45.3978	0.519172	0.128835	0.0383225	-0.131786	0.0925352	0.481899	0.246455	0.306658	0.408052	0.0469784	0.455201	0.602485	0.402959	-0.403202	-0.510265	0.327988	-0.391578	-0.299678	-0.298885	green	0.0703309	protein_coding
CD36	152.44	42.195	110.245	-68.0496	0.299287	-0.292233	-0.152363	0.241314	0.11642	0.7208	0.279537	0.429914	0.43931	0.390192	0.769079	0.781574	0.645879	-0.395487	-0.406351	0.182966	-0.743192	-0.36879	-0.123019	red	0.496424	protein_coding
MMRN1	81.5481	35.12	46.4281	-11.3082	0.316296	-0.149951	0.00790481	-0.17915	-0.0567566	0.34678	-0.101044	0.0876646	0.200738	0.273724	0.608297	0.771273	0.459997	-0.14537	-0.525732	0.0337427	-0.350067	-0.174562	-0.355853	green	0.50268	protein_coding
MXRA5	148.479	63.8416	84.6375	-20.7959	0.409898	-0.139781	0.129165	0.168106	0.117057	0.319691	-0.219287	0.303512	0.533014	0.518169	0.75198	0.871264	0.592368	-0.265637	-0.501301	0.147836	-0.479092	-0.15673	-0.225732	green	0.55515	protein_coding
TYROBP	195.325	110.664	84.6619	26.0018	0.0132109	-0.613025	-0.422823	0.278076	-0.0481369	0.57278	0.140914	0.290981	0.130826	0.41233	0.951958	0.631044	0.715053	-0.224126	-0.0908334	0.0103102	-0.796696	-0.466862	-0.00853554	red	0.756255	protein_coding
PLP1	63.3035	9.24198	54.0615	-44.8195	0.479302	0.117392	0.349602	0.257985	0.393406	0.138489	-0.0699084	0.791275	0.763755	0.289205	0.228368	0.547225	0.295718	-0.298384	-0.467232	0.242066	-0.417567	-0.0617087	-0.0677055	greenyellow	-0.111079	protein_coding
GIMAP2	209.878	72.1275	137.75	-65.6226	0.44017	-0.286883	0.0736749	0.390398	0.33236	0.371077	-0.0251555	0.319072	0.394041	0.699836	0.7829	0.890114	0.858368	-0.448132	-0.472014	0.015136	-0.686919	-0.245038	-0.292692	green	0.708894	protein_coding
CLEC5A	135.33	81.8593	53.4707	28.3887	-0.0590316	-0.617051	-0.357441	0.0455564	-0.0975534	0.411194	-0.0854593	0.344523	0.0870113	0.304747	0.901726	0.640641	0.545392	-0.108885	-0.0886188	-0.0449967	-0.655456	-0.295328	-0.08878	red	0.687272	protein_coding
ATP1A2	157.124	70.382	86.742	-16.36	-0.132946	0.492373	0.267267	-0.297901	-0.0012065	-0.571271	-0.11653	-0.283308	-0.278832	-0.566208	-0.868532	-0.711648	-0.718279	0.245612	0.23929	-0.0990168	0.736782	0.424474	0.0459922	red	-0.739331	protein_coding
NCF2	169.598	86.6677	82.9305	3.73719	0.164603	-0.498703	-0.311934	0.0938588	0.0621452	0.56948	0.177459	0.360987	0.298288	0.462003	0.894102	0.701087	0.687472	-0.297682	-0.259367	-0.0643113	-0.757969	-0.39441	-0.135241	red	0.691284	protein_coding
VAMP8	188.319	95.6477	92.6715	2.97612	0.139442	-0.5513	-0.29166	0.389518	0.066129	0.534791	0.115515	0.248297	0.202969	0.631092	0.921883	0.713456	0.794743	-0.239066	-0.235248	-0.11499	-0.772902	-0.44087	-0.0580453	red	0.821847	protein_coding
TIMP4	71.902	25.9983	45.9037	-19.9054	-0.401449	0.0371305	-0.0779179	-0.202113	-0.101094	-0.37804	-0.00962602	-0.0579098	-0.486405	-0.574482	-0.558569	-0.651539	-0.512178	0.208387	0.45759	-0.0824867	0.393139	0.318791	0.0727686	green	-0.47179	protein_coding
GPR183	129.122	50.3453	78.7766	-28.4313	0.281234	-0.272351	-0.18633	0.220287	0.0401491	0.620234	0.218956	0.26971	0.25714	0.369125	0.792175	0.675183	0.622307	-0.263513	-0.406935	0.0594886	-0.706467	-0.469292	-0.0351788	red	0.509291	protein_coding
SFRP4	84.0529	32.1395	51.9133	-19.7738	0.410936	-0.0526811	0.209768	0.211504	0.281655	0.171894	-0.190244	0.401608	0.710908	0.498016	0.52781	0.698074	0.469213	-0.242255	-0.435916	0.104921	-0.482138	-0.132232	-0.0966696	green	0.305704	protein_coding
S100A12	24.0373	4.95701	19.0803	-14.1233	-0.13844	-0.125835	-0.431598	0.103014	-0.196383	0.291605	0.386745	0.08623	0.100253	-0.113554	0.0725367	-0.194894	0.0261635	0.2365	0.0325124	-0.565226	-0.267665	-0.58448	0.664402	grey	0.0848802	protein_coding
S100A9	34.2799	8.29407	25.9858	-17.6917	-0.0600859	-0.39377	-0.494118	0.218311	0.0199673	0.595747	0.610215	-0.0194669	0.0433271	0.34743	0.410775	0.0835566	0.417638	-0.182076	0.0528747	-0.242876	-0.527741	-0.476984	0.181439	pink	0.45896	protein_coding
CASQ2	113.143	40.2948	72.8485	-32.5537	-0.054192	0.507598	0.4468	-0.148771	0.0980028	-0.827273	-0.49238	-0.264532	-0.0950582	-0.369843	-0.74191	-0.578918	-0.584191	0.193687	0.284576	-0.0533526	0.768896	0.516485	0.0484502	brown	-0.535725	protein_coding
ITGAM	203.75	104.662	99.088	5.57439	0.179334	-0.469933	-0.366621	0.167578	-0.0540187	0.680431	0.249398	0.299097	0.290398	0.425131	0.934126	0.71399	0.685938	-0.179973	-0.354617	-0.131621	-0.804066	-0.551839	0.0200781	red	0.695392	protein_coding
MNDA	65.7632	28.5392	37.224	-8.68488	0.296339	-0.229564	-0.183302	0.165956	0.107604	0.510259	0.28097	0.259112	0.27971	0.349021	0.696901	0.507156	0.553536	-0.314677	-0.273217	-0.0283461	-0.604323	-0.394372	-0.052966	red	0.442329	protein_coding
IFI44L	79.5452	31.1356	48.4095	-17.2739	0.30395	-0.0778167	-0.0427381	0.0792808	-0.12032	0.53813	0.0462511	0.185298	0.355278	0.290595	0.615711	0.678751	0.407414	-0.102987	-0.497266	0.158061	-0.42401	-0.377658	-0.00840037	green	0.363876	protein_coding
COMP	14.078	2.60007	11.4779	-8.87786	0.132177	0.0104964	-0.0122123	-0.081091	0.320904	0.0567208	0.117541	0.219406	0.425814	-0.0752691	0.0586081	0.136481	0.173454	-0.42335	0.0691572	0.0738516	-0.177742	0.0948988	-0.202563	grey	0.0135134	protein_coding
CD14	173.045	95.1532	77.8919	17.2613	0.147596	-0.538939	-0.252249	0.29877	0.103181	0.430887	0.0422474	0.229893	0.0808673	0.557274	0.921106	0.693619	0.789366	-0.293279	-0.193554	-0.0584942	-0.7231	-0.33985	-0.183854	red	0.786885	protein_coding
CXCL16	141.639	86.3698	55.2694	31.1004	0.0724075	-0.471603	-0.240022	0.132201	-0.0403185	0.396015	-0.122966	0.328441	0.237913	0.342664	0.904833	0.695005	0.572637	-0.168641	-0.17778	0.0563121	-0.641411	-0.28063	-0.0978183	red	0.639105	protein_coding
EIF1AY	16.6897	7.73509	8.95461	-1.21953	0.0454459	-0.153904	0.204768	0.377329	0.3187	-0.143214	-0.216197	0.203189	0.13379	0.680812	0.0623814	0.152289	0.219036	-0.0734801	-0.0409421	-0.0057745	-0.125534	0.136638	-0.0630836	purple	0.203446	protein_coding
TREM1	121.142	78.2473	42.8945	35.3528	-0.128289	-0.627602	-0.428197	-0.00371275	-0.165017	0.44552	-0.0287902	0.296789	0.0551751	0.240424	0.887509	0.551082	0.475591	-0.0597718	-0.0225518	-0.0464648	-0.643316	-0.327315	-0.0161207	red	0.658547	protein_coding
LRRN4CL	120.803	9.57371	111.229	-101.655	0.639896	0.213372	0.406032	0.341087	0.519884	0.0748803	-0.135597	0.315277	0.869492	0.525034	0.318223	0.685045	0.525286	-0.421792	-0.530385	-0.0238678	-0.349935	-0.0955303	-0.155188	grey60	0.229611	protein_coding
CAPG	119.878	72.415	47.4632	24.9518	0.059601	-0.500004	-0.318837	0.0184885	-0.112415	0.392594	-0.0945458	0.269127	0.188298	0.270924	0.884003	0.682407	0.587245	-0.14484	-0.157464	-0.0025943	-0.604595	-0.357151	-0.114577	red	0.66883	protein_coding
ANPEP	121.562	52.6749	68.887	-16.2121	0.130169	-0.448586	-0.284542	-0.00309203	0.0391979	0.591202	0.136866	0.380481	0.485732	0.457751	0.812846	0.699192	0.528706	-0.20582	-0.285085	-0.0263565	-0.708759	-0.355989	-0.0788289	red	0.563591	protein_coding
ARL4C	150.613	75.1738	75.4396	-0.265853	0.16556	-0.421844	-0.325554	0.205881	-0.0268452	0.625275	0.205456	0.277012	0.274744	0.378267	0.875292	0.685982	0.695603	-0.277037	-0.262114	-0.0109776	-0.733506	-0.491931	-0.0326648	red	0.700784	protein_coding
LAPTM5	160.222	105.868	54.3533	51.5151	0.0195759	-0.573061	-0.340109	0.114594	-0.103646	0.485185	0.00418101	0.227383	0.052205	0.406056	0.950106	0.658283	0.632945	-0.190506	-0.121963	0.0606693	-0.651151	-0.320742	-0.153387	red	0.766302	protein_coding
SLC16A6	139.002	55.3891	83.6125	-28.2234	-0.0717163	-0.613455	-0.491762	0.201847	-0.0393524	0.607776	0.287932	0.389611	0.0403764	0.182844	0.816397	0.479828	0.568686	-0.186816	-0.0345216	-0.0134782	-0.82505	-0.461636	0.0556984	red	0.525813	protein_coding
MMP3	38.5385	3.6152	34.9233	-31.3081	-0.0232886	-0.423261	-0.264786	0.264948	0.252043	0.284357	0.248285	0.601266	0.249368	0.162107	0.3786	0.262225	0.445746	-0.315666	0.0688944	0.0691786	-0.6602	-0.204402	-0.014784	greenyellow	0.199043	protein_coding
GIMAP6	106.493	40.6162	65.8767	-25.2605	0.358536	-0.296866	0.111341	0.193695	0.378353	0.139467	-0.122836	0.200131	0.201183	0.590044	0.646256	0.744282	0.767111	-0.501283	-0.285761	0.0830766	-0.486273	0.00464616	-0.531034	green	0.643982	protein_coding
SGK1	189.8	75.6266	114.174	-38.5472	0.245281	-0.401133	-0.2244	0.201692	0.05717	0.571605	0.111203	0.402151	0.284515	0.29269	0.876898	0.816529	0.754558	-0.388987	-0.306158	0.172266	-0.752467	-0.405777	-0.201119	red	0.613645	protein_coding
CPVL	138.365	65.4059	72.9592	-7.55328	0.19424	-0.407766	-0.20659	0.367594	0.088685	0.3979	-0.0310874	0.228675	0.268482	0.432519	0.857993	0.721332	0.749562	-0.246665	-0.247206	-0.089982	-0.703099	-0.405279	-0.0473467	red	0.709349	protein_coding
SELL	15.1214	3.55346	11.5679	-8.01446	0.0605909	-0.235228	-0.258884	-0.130628	-0.141685	0.533897	0.344425	0.110551	0.158234	0.306993	0.396529	0.269845	0.239534	-0.122645	-0.175305	0.122917	-0.303319	-0.251832	-0.0718038	red	0.328874	protein_coding
CNTN3	102.185	29.8726	72.3121	-42.4396	0.439245	0.811505	0.538635	-0.243986	0.0258211	-0.266934	-0.089688	-0.425034	0.151845	-0.194545	-0.548047	-0.152317	-0.372984	0.0457394	-0.394863	0.026938	0.640915	0.206796	-0.114992	black	-0.457867	protein_coding
CPA3	89.485	21.1507	68.3343	-47.1837	0.394726	-0.0468071	0.0237086	0.205719	0.0819276	0.323217	-0.00134916	0.448811	0.732	0.416854	0.551415	0.612148	0.427012	-0.0258163	-0.546569	-0.223122	-0.545488	-0.457603	0.227444	green	0.307973	protein_coding
MT1M	22.8357	6.36322	16.4725	-10.1092	0.21176	-0.0120192	-0.192611	-0.161166	-0.0112361	0.309009	0.123677	-0.116057	0.151983	-0.0453336	0.34173	0.401741	0.352989	-0.213092	-0.235097	-0.0550436	-0.248179	-0.338746	-0.167925	green	0.22385	protein_coding
EDN1	81.9348	25.3228	56.6121	-31.2893	0.0807014	-0.431444	-0.333898	-0.0751785	-0.0520193	0.512775	0.127642	0.113422	0.108175	0.159027	0.711422	0.667117	0.611789	-0.31637	-0.182791	0.0890469	-0.541139	-0.26872	-0.332416	green	0.633999	protein_coding
HMOX1	89.2117	38.4685	50.7431	-12.2746	0.0863715	-0.493516	-0.421519	0.158854	0.120672	0.699564	0.521378	0.342332	0.293006	0.420817	0.644328	0.463961	0.5935	-0.316274	-0.166085	-0.020444	-0.788745	-0.452472	-0.0564171	brown	0.492418	protein_coding
TMIGD3	130.015	41.4616	88.5531	-47.0916	-0.270089	-0.754899	-0.640848	0.220596	-0.112763	0.468895	0.204028	0.154161	-0.0975285	0.23539	0.7898	0.340152	0.568875	-0.0726636	0.175627	-0.234403	-0.741971	-0.461819	0.117815	brown	0.710759	protein_coding
ADSS1	58.3744	20.1007	38.2736	-18.1729	-0.338331	0.0650629	-0.0271766	-0.103972	-0.0287628	-0.404962	-0.0460692	-0.51744	-0.429701	0.00608837	-0.548895	-0.64497	-0.42245	0.247212	0.403924	-0.147644	0.486511	0.240169	0.0445653	green	-0.236452	protein_coding
CILP	45.108	7.43318	37.6748	-30.2417	0.370573	0.0255893	0.0493388	0.13301	0.208414	0.356368	0.272007	0.770466	0.681122	0.0624038	0.222171	0.41535	0.274787	-0.217509	-0.442226	0.0910634	-0.524103	-0.286965	0.0861786	greenyellow	-0.139018	protein_coding
ADGRG2	78.7835	17.1917	61.5918	-44.4	0.50725	0.0682375	0.0883704	0.531799	0.529849	0.425588	0.480296	0.48693	0.66106	0.411462	0.19703	0.417966	0.542212	-0.442022	-0.467309	-0.166391	-0.609761	-0.372853	0.0735013	brown	0.0554175	protein_coding
CCDC146	123.22	52.5423	70.6775	-18.1351	-0.0728476	0.54914	0.402872	-0.230917	-0.138729	-0.538381	-0.331845	-0.338241	-0.00737976	-0.198302	-0.732984	-0.559146	-0.745812	0.407275	0.0730157	-0.0232476	0.791628	0.409725	0.182499	brown	-0.519306	protein_coding
MYOC	44.4058	22.7459	21.6599	1.08603	0.558851	0.536099	0.355497	0.210563	0.349243	0.0865164	0.26447	0.350528	0.626876	-0.0899817	-0.245317	0.124748	0.125488	-0.337728	-0.405635	0.057104	-0.0617305	-0.162564	0.0898924	blue	-0.349998	protein_coding
ZNF880	62.7964	35.2025	27.5939	7.60869	0.635245	0.48705	0.594507	0.365469	0.493115	-0.259578	-0.226943	0.252076	0.266149	-0.0181617	0.0297146	0.314765	0.296747	-0.406295	-0.408751	0.193089	-0.0683901	0.135958	-0.215634	blue	-0.235806	protein_coding
LTF	7.66853	1.7027	5.96583	-4.26312	0.165868	0.0135133	0.104424	-0.216826	0.153021	0.143563	0.0456005	-0.196915	0.1784	0.488407	0.120276	0.198973	0.0830502	-0.198379	-0.138133	0.0699083	0.0623253	0.140443	-0.343764	grey	0.204894	protein_coding
VSIG4	113.138	51.8353	61.3022	-9.46686	0.0468356	-0.590626	-0.401841	0.219846	0.0942412	0.513025	0.29695	0.163608	-0.043159	0.497783	0.797073	0.499324	0.713435	-0.273922	-0.110347	-0.182916	-0.72154	-0.367446	-0.159359	red	0.707067	protein_coding
CCL8	63.4471	22.3912	41.0559	-18.6647	0.103609	-0.376879	-0.205621	0.153877	-0.112107	0.495462	0.048089	0.359561	0.165603	0.242367	0.683131	0.662637	0.537836	-0.179631	-0.265197	0.0957594	-0.528546	-0.298304	-0.0978671	red	0.565555	protein_coding
CHRDL1	151.944	8.40302	143.541	-135.138	0.649547	0.141844	0.301103	0.314994	0.493091	0.171788	-0.059826	0.40773	0.826368	0.386074	0.450521	0.761266	0.638168	-0.511935	-0.523469	0.0748695	-0.49779	-0.184618	-0.197923	grey60	0.243379	protein_coding
MPEG1	183.421	78.4749	104.946	-26.4714	0.334641	-0.368011	-0.165932	0.293273	0.194273	0.56246	0.224007	0.329708	0.348736	0.590143	0.868823	0.732746	0.777983	-0.39083	-0.373248	-0.0126193	-0.763485	-0.373332	-0.187009	red	0.656657	protein_coding
PDK4	11.335	2.81579	8.51921	-5.70342	0.169902	0.219685	-0.0496618	-0.0117002	0.160952	0.0755898	0.215578	-0.0482686	0.216763	-0.372978	-0.0428526	-0.0351465	0.0704181	-0.222332	-0.0151234	0.0050179	-0.142207	-0.206505	0.110278	grey	-0.210329	protein_coding
FGFBP2	38.4978	7.46755	31.0302	-23.5627	0.0940116	-0.325718	-0.184873	0.325141	0.212755	0.463269	0.379204	0.753876	0.321858	0.263318	0.371919	0.299074	0.38711	-0.26519	-0.141022	0.069649	-0.661419	-0.2535	0.0598522	greenyellow	0.118643	protein_coding
KCNK17	102.801	36.0042	66.7964	-30.7922	-0.215165	0.426519	0.219628	-0.361104	-0.186838	-0.588875	-0.330183	-0.226196	-0.174042	-0.652451	-0.743343	-0.589702	-0.722057	0.403514	0.210884	-0.167427	0.712735	0.377565	0.185924	red	-0.585855	protein_coding
HBEGF	33.1107	9.56375	23.5469	-13.9832	0.151934	-0.0650353	-0.101791	-0.0124419	-0.178244	0.548392	0.197356	0.442532	0.424954	0.00726059	0.287954	0.492307	0.136331	0.0353604	-0.439873	0.0582369	-0.351251	-0.33748	0.119679	green	0.0441274	protein_coding
CD37	115.071	60.3593	54.7115	5.64783	0.126733	-0.493741	-0.165529	0.144541	0.13622	0.390285	-0.0158767	0.178073	0.22323	0.663752	0.840488	0.673742	0.661587	-0.351114	-0.148356	0.107506	-0.579408	-0.138529	-0.336174	red	0.761437	protein_coding
PLIN2	28.9647	11.3714	17.5933	-6.22196	0.0224561	-0.275859	-0.335459	0.152783	0.191239	0.194876	0.198423	-0.0191365	-0.0287458	-0.0750775	0.373939	0.221435	0.502262	-0.275297	0.0818133	-0.326652	-0.476975	-0.353753	0.0104378	brown	0.361283	protein_coding
SOX17	72.5696	40.4571	32.1125	8.3446	0.365972	0.0851684	0.128617	-0.116331	-0.0924925	0.457093	0.0904233	0.3036	0.363641	0.182168	0.275796	0.633659	0.211665	-0.0798661	-0.643472	0.149137	-0.195244	-0.161296	-0.198542	turquoise	0.0951984	protein_coding
GALNT15	17.0211	3.09319	13.9279	-10.8347	0.152759	0.0921677	-0.180279	-0.108836	0.194617	0.115473	0.333937	0.110387	0.316631	-0.299443	-0.0373347	-0.00256991	0.1758	-0.25252	-0.0169576	-0.280088	-0.2191	-0.27858	0.07295	grey	-0.066571	protein_coding
TMEM200A	183.936	66.231	117.705	-51.4744	0.59671	0.00946622	0.353854	0.115874	0.27183	0.24011	-0.157479	0.457829	0.434166	0.463594	0.61228	0.875859	0.590798	-0.421902	-0.631239	0.339483	-0.426301	-0.0101181	-0.463606	green	0.320645	protein_coding
DDX17	23.1848	6.1767	17.0081	-10.8314	0.0748064	-0.261767	-0.104411	0.421638	0.295783	0.447423	0.470283	-0.0483589	-0.0694499	0.681852	0.22881	0.143066	0.429887	-0.389553	-0.0123901	0.239971	-0.371328	-0.100993	-0.231505	purple	0.321457	protein_coding
HLA-DRA	166.165	68.0341	98.1311	-30.097	0.242687	-0.381612	-0.099328	0.360337	0.0943252	0.397286	-0.0880177	0.345376	0.403614	0.535977	0.858428	0.800323	0.718896	-0.228819	-0.347929	0.00616426	-0.702575	-0.35034	-0.063563	red	0.696633	protein_coding
FOS	14.4322	2.58044	11.8518	-9.27135	0.0975828	-0.0116532	0.0818792	0.0463933	-0.0634082	0.184314	-0.0885	0.4139	0.348137	-0.0194176	0.217535	0.291807	-0.024155	0.052881	-0.235171	0.328865	-0.241906	-0.0617973	0.074283	grey	-0.151139	protein_coding
C17orf58	88.9801	9.77692	79.2032	-69.4263	0.599542	0.476941	0.386476	0.177327	0.299014	0.0875397	0.0308671	0.373057	0.897129	0.0476517	-0.0334264	0.405978	0.146695	-0.180122	-0.585811	-0.09341	-0.159118	-0.225181	0.148533	grey60	-0.217581	protein_coding
SLC31A2	171.742	59.4572	112.285	-52.8279	0.305816	-0.294729	-0.257291	0.134275	0.0404488	0.585195	0.204071	0.398667	0.522263	0.254333	0.8183	0.733226	0.658309	-0.235952	-0.420353	-0.0923546	-0.79115	-0.551979	0.0461339	red	0.506125	protein_coding
CYTL1	23.1555	5.22943	17.9261	-12.6967	0.240308	0.523891	0.338685	-0.248153	0.000906674	-0.264156	-0.195215	-0.233668	0.369367	-0.278497	-0.37463	-0.0369776	-0.245573	0.018899	-0.179146	-0.0665791	0.434425	0.172714	-0.00459058	black	-0.198517	protein_coding
SLAMF8	178.774	111.674	67.0997	44.5743	-0.118468	-0.69906	-0.492257	0.0539976	-0.152162	0.509799	0.0362874	0.165236	0.0108679	0.368795	0.960574	0.598972	0.611093	-0.118204	-0.0178935	-0.0723632	-0.69501	-0.364526	-0.0863747	red	0.826721	protein_coding
LGR6	158.73	57.2183	101.511	-44.2932	-0.136985	0.527158	0.202227	-0.457982	-0.111184	-0.48833	-0.109576	-0.589106	-0.248237	-0.552745	-0.827449	-0.660866	-0.724374	0.246552	0.239202	-0.0955586	0.83632	0.377138	-0.0118149	red	-0.598014	protein_coding
ST6GAL2	125.094	61.9541	63.1399	-1.18583	0.0401099	0.6267	0.392339	-0.315238	-0.171581	-0.503397	-0.266169	-0.546212	-0.109476	-0.265469	-0.707558	-0.493601	-0.671109	0.380177	-0.0395986	-0.054902	0.828567	0.317496	0.0658987	brown	-0.512251	protein_coding
RBM3	67.2619	31.7158	35.5461	-3.83024	0.561701	0.460156	0.73518	0.398837	0.593308	-0.294874	-0.152471	0.0819605	0.176611	0.420882	-0.170018	0.133525	0.121928	-0.379508	-0.34311	0.324251	0.118808	0.435364	-0.39981	blue	-0.248887	protein_coding
HLA-DPA1	141.017	63.5241	77.4926	-13.9685	0.160688	-0.411099	-0.114894	0.332892	0.0692635	0.379946	-0.128802	0.331694	0.370159	0.520361	0.846201	0.749711	0.657376	-0.227387	-0.246821	0.110882	-0.665643	-0.274736	-0.0757226	red	0.681137	protein_coding
EMP1	96.3824	24.3095	72.073	-47.7635	0.464231	0.159646	0.133603	0.123286	0.0590438	0.359516	0.0435098	0.646143	0.773536	-0.0306881	0.364825	0.614052	0.282243	-0.116497	-0.591985	0.0690716	-0.469742	-0.390389	0.201397	green	-0.0419257	protein_coding
C3AR1	174.303	90.3788	83.9243	6.45453	0.0439971	-0.623183	-0.419138	0.25685	0.0510554	0.518292	0.182113	0.201024	0.0413949	0.431885	0.90954	0.627506	0.791921	-0.30202	-0.0837196	-0.119541	-0.773349	-0.442099	-0.128922	red	0.817777	protein_coding
SLN	58.6276	22.567	36.0607	-13.4937	0.0264008	-0.287882	-0.328211	0.128329	-0.15498	0.570759	0.215573	0.538071	0.391719	-0.0140113	0.589567	0.412058	0.290388	-0.0214322	-0.205352	0.0634498	-0.655063	-0.472114	0.295561	brown	0.208565	protein_coding
CD52	178.415	84.5791	93.8354	-9.25633	-0.0166376	-0.667306	-0.384239	0.331607	-0.0251171	0.564886	0.131178	0.344658	0.191269	0.568919	0.90235	0.635595	0.706888	-0.151495	-0.15841	-0.0716624	-0.808496	-0.409125	0.0402191	red	0.813165	protein_coding
ABRACL	206.153	57.5513	148.602	-91.0503	0.582132	-0.0396364	0.162629	0.37829	0.219802	0.461177	0.100859	0.309057	0.468038	0.584199	0.685433	0.823337	0.707397	-0.331508	-0.670662	-0.00987068	-0.5816	-0.32692	-0.142954	green	0.512633	protein_coding
HLA-DMB	183.891	89.973	93.918	-3.94509	0.151323	-0.51417	-0.20581	0.415363	0.143974	0.418936	-0.0115088	0.328403	0.288488	0.579039	0.909771	0.722411	0.781841	-0.310108	-0.160023	0.051923	-0.769674	-0.350931	-0.0916416	red	0.756452	protein_coding
PNMA8A	91.8082	32.6044	59.2038	-26.5994	0.260421	0.715335	0.534176	-0.18544	0.105274	-0.36996	-0.139351	-0.181691	0.266501	-0.150719	-0.691207	-0.308897	-0.519456	0.0840958	-0.162617	0.0533153	0.655891	0.313946	0.0140044	brown	-0.573236	protein_coding
NPL	226.69	98.341	128.349	-30.0076	0.176225	-0.559901	-0.304014	0.340945	0.143824	0.620082	0.247009	0.352016	0.305139	0.661156	0.916343	0.715074	0.802861	-0.317312	-0.263481	-0.0318209	-0.866876	-0.43991	-0.0899572	red	0.751714	protein_coding
MCTP1	196.56	81.2009	115.359	-34.1583	0.509435	-0.167304	0.0852799	0.199917	0.310335	0.356891	-0.0023967	0.428032	0.490826	0.434075	0.684719	0.91502	0.764754	-0.429292	-0.557497	-0.0471191	-0.634845	-0.273932	-0.321251	green	0.500054	protein_coding
FLT1	99.1467	16.6522	82.4945	-65.8423	0.361263	-0.0814545	-0.0217215	0.191792	0.0863592	0.628492	0.248077	0.57987	0.582426	0.213081	0.480641	0.729768	0.46126	-0.275975	-0.547086	0.163999	-0.601517	-0.389793	-0.0284546	brown	0.195279	protein_coding
MARCKS	210.501	55.033	155.468	-100.435	0.383342	-0.306917	-0.0549988	0.329687	0.152308	0.584611	0.134165	0.388632	0.433529	0.601622	0.812534	0.878677	0.794429	-0.388625	-0.485724	0.154105	-0.723848	-0.382352	-0.198464	red	0.653845	protein_coding
FPR3	145.315	85.6402	59.6744	25.9658	0.0982342	-0.470254	-0.274354	0.13741	-0.110547	0.44346	-0.0393989	0.376803	0.170374	0.213923	0.905019	0.690212	0.607054	-0.143237	-0.223422	0.0254398	-0.681831	-0.391239	-0.0214777	red	0.625309	protein_coding
MYOCD	115.421	58.4561	56.9652	1.49088	-0.0627777	0.565255	0.261222	-0.391335	-0.248568	-0.446688	-0.235703	-0.500326	-0.183353	-0.360599	-0.6888	-0.53929	-0.695325	0.377224	0.0563741	-0.0399482	0.824611	0.274855	0.0831196	brown	-0.526817	protein_coding
CFD	31.1279	9.01504	22.1129	-13.0978	0.320833	0.0657593	0.129077	0.199169	0.307449	0.106717	-0.0529636	0.458595	0.873626	0.214062	0.219037	0.424004	0.287992	-0.242996	-0.276364	-0.0368728	-0.371068	-0.144324	0.100038	grey60	0.0971704	protein_coding
HK2	74.1535	35.5152	38.6384	-3.12324	-0.0291118	-0.551187	-0.428495	0.270405	-0.00156295	0.409268	0.160929	0.13112	-0.0708373	0.29546	0.761539	0.419525	0.620901	-0.182711	0.00956861	-0.0680796	-0.67019	-0.457633	0.00524598	red	0.586362	protein_coding
APOLD1	39.4564	9.96606	29.4903	-19.5242	0.36012	0.0498099	0.048821	0.156219	0.226487	0.38193	0.216653	0.417251	0.374247	-0.0326963	0.281967	0.516411	0.375327	-0.354501	-0.397958	0.143124	-0.435066	-0.189746	-0.170474	green	-0.0235791	protein_coding
CCR1	182.601	77.6118	104.989	-27.3771	0.16072	-0.547607	-0.340257	0.359913	0.142156	0.605445	0.288811	0.253959	0.225738	0.660972	0.869483	0.651216	0.804197	-0.289737	-0.263955	-0.198155	-0.835807	-0.473169	-0.0501629	red	0.786784	protein_coding
LAIR1	223.804	121.665	102.139	19.5263	0.159548	-0.519562	-0.286456	0.11242	-0.053654	0.599946	0.0787036	0.285417	0.228784	0.530523	0.972372	0.795848	0.6956	-0.212525	-0.343174	0.0281506	-0.730281	-0.36822	-0.181303	red	0.760822	protein_coding
IL1R2	24.9745	8.21941	16.7551	-8.5357	-0.0933886	-0.119243	-0.440988	-0.0585526	-0.0223219	0.355921	0.584768	0.0902699	0.048496	-0.276707	0.0687341	-0.237211	0.0299452	-0.0902262	0.164879	-0.242322	-0.304774	-0.386804	0.289239	pink	-0.0740814	protein_coding
TAFA5	37.5353	10.762	26.7733	-16.0114	0.345416	0.65055	0.388602	-0.207996	0.0471246	-0.119646	0.0152285	-0.0617326	0.416597	-0.264731	-0.457088	-0.096303	-0.313883	-0.0509351	-0.291624	0.0390685	0.432679	0.145654	-0.0140477	black	-0.397683	protein_coding
CD74	81.7324	43.7343	37.9981	5.73612	0.0557803	-0.411529	-0.165927	0.119592	-0.0594846	0.276215	-0.214647	0.253606	0.296194	0.307256	0.790826	0.651706	0.499884	-0.134727	-0.139894	0.188852	-0.550325	-0.21045	-0.0909633	red	0.579161	protein_coding
C1QA	185.967	102.382	83.5846	18.7978	0.132449	-0.528905	-0.371002	0.153038	-0.0431267	0.611731	0.187159	0.207473	0.156096	0.480106	0.937526	0.704194	0.742267	-0.259792	-0.250559	0.00955399	-0.741079	-0.445976	-0.153247	red	0.764246	protein_coding
RNASE1	200.522	101.383	99.1384	2.24476	0.128561	-0.524465	-0.346488	0.111893	0.0167866	0.631974	0.153941	0.299682	0.290518	0.438941	0.935776	0.758066	0.726025	-0.323197	-0.21672	0.0517624	-0.767586	-0.405211	-0.150865	red	0.749168	protein_coding
IGF1	27.9958	9.28348	18.7123	-9.42884	0.0818989	-0.281934	-0.156973	0.151709	0.390827	0.159757	0.208922	0.268331	0.098316	0.127435	0.259995	0.269333	0.468552	-0.409639	0.0224857	-0.168907	-0.453486	-0.0732121	-0.240039	brown	0.241299	protein_coding
ADRA2A	90.047	43.2218	46.8252	-3.60338	0.297103	-0.293171	0.133101	0.00603808	0.259182	0.204444	-0.196808	0.166625	0.226275	0.669005	0.625299	0.778335	0.587988	-0.360008	-0.338495	0.106125	-0.368931	0.0867782	-0.564503	green	0.622251	protein_coding
MYH11	160.77	68.8669	91.9032	-23.0364	-0.183367	0.431117	0.327707	-0.238401	-0.102851	-0.728936	-0.400433	-0.56703	-0.484835	-0.315926	-0.748964	-0.673551	-0.667779	0.351172	0.279854	-0.0555104	0.874897	0.492702	-0.0140024	brown	-0.515306	protein_coding
EBF2	204.668	47.9303	156.738	-108.808	0.620168	0.0967917	0.178941	0.291857	0.347462	0.509408	0.265382	0.623957	0.82275	0.31352	0.402967	0.780002	0.576355	-0.413142	-0.701926	0.0408353	-0.634079	-0.360584	-0.0502853	green	0.152767	protein_coding
ATP5F1E	15.2705	3.33239	11.9381	-8.60573	0.12722	0.322465	0.00557116	-0.13018	-0.255102	0.231789	0.0473554	-0.0803505	0.312707	-0.292659	-0.0158578	0.0762064	-0.191847	0.12211	-0.242961	0.066613	0.0842085	-0.225503	0.258819	grey	-0.182732	protein_coding
TMEM100	146.201	10.9679	135.233	-124.265	0.626177	0.305745	0.318089	0.337554	0.38078	0.259036	0.168695	0.643469	0.926903	0.244784	0.127062	0.527769	0.344792	-0.239852	-0.680883	-0.130163	-0.448033	-0.309727	0.189421	grey60	-0.089481	protein_coding
SFRP1	10.3016	2.15725	8.14434	-5.98709	-0.234739	0.0593337	-0.0259933	-0.0960275	-0.0567	-0.140978	-0.138742	0.0604468	0.339999	-0.0271939	-0.285529	-0.244441	-0.383553	0.266106	0.158269	-0.214566	0.186378	0.0986023	0.28907	grey	-0.160807	protein_coding
SAMSN1	105.696	46.7516	58.944	-12.1924	0.270127	-0.214498	-0.256215	0.205916	-0.0448426	0.593283	0.240232	0.210175	0.293383	0.2604	0.778281	0.577242	0.574227	-0.173573	-0.376044	-0.125029	-0.65585	-0.574016	0.144095	red	0.508549	protein_coding
CCDC80	39.852	20.7489	19.1031	1.64582	0.20756	-0.107105	0.0405	-0.171629	-0.0827801	0.178006	-0.312768	-0.0862168	0.438514	0.405237	0.506463	0.660061	0.312017	-0.0466157	-0.339695	0.101553	-0.155084	-0.0913559	-0.245783	green	0.482955	protein_coding
VIT	57.1311	7.69023	49.4409	-41.7506	0.451737	0.0685002	0.182578	0.114328	0.430711	0.218825	0.127591	0.648495	0.821522	0.235859	0.196546	0.525467	0.364131	-0.39055	-0.425658	0.0195498	-0.443328	-0.112803	-0.135399	grey60	-0.0101374	protein_coding
ACADL	122.83	64.4839	58.3459	6.13803	0.108609	0.607071	0.386249	0.0524756	0.237521	-0.520918	0.0725619	-0.216215	-0.149341	-0.341898	-0.871465	-0.677085	-0.507944	0.117802	0.0729019	-0.273543	0.580654	0.255712	0.180352	red	-0.726082	protein_coding
EPB41L3	232.51	82.5342	149.976	-67.442	0.356494	-0.332942	-0.0653665	0.201038	0.171741	0.504486	0.0152891	0.420595	0.495252	0.501179	0.845594	0.922359	0.769495	-0.387962	-0.461257	0.142821	-0.736826	-0.309499	-0.261699	green	0.628372	protein_coding
TNFAIP3	90.3174	23.833	66.4843	-42.6513	-0.00715134	-0.510705	-0.399817	0.076785	-0.157361	0.685689	0.211891	0.206322	0.102694	0.271074	0.744947	0.67325	0.565575	-0.182107	-0.206207	0.0836938	-0.625348	-0.417937	-0.11151	green	0.62981	protein_coding
FNDC1	37.8386	14.4761	23.3625	-8.88646	0.454509	0.549617	0.518437	-0.0925521	0.143469	-0.242821	-0.3567	-0.0685202	0.336068	-0.201976	-0.0666379	0.25794	-0.0566781	-0.131399	-0.37989	0.0521556	0.277776	0.252515	-0.181813	blue	-0.149332	protein_coding
SUCNR1	42.6035	14.5134	28.0901	-13.5767	0.322809	-0.0570937	0.207441	0.170136	0.0920025	0.169117	-0.143374	0.64902	0.317701	0.0458726	0.423528	0.592736	0.340926	-0.169758	-0.420251	0.139131	-0.395574	-0.0477272	-0.0874382	green	0.13953	protein_coding
ZBTB16	58.551	15.3667	43.1843	-27.8177	-0.354481	0.0302321	-0.364061	-0.46747	-0.228234	-0.0168104	0.282998	-0.595329	-0.538786	-0.544934	-0.347312	-0.554492	-0.357646	0.0837946	0.413959	-0.0968614	0.342325	0.0427528	-0.0576812	green	-0.212971	protein_coding
GIMAP7	185.804	70.6446	115.159	-44.5143	0.515166	-0.164951	0.110836	0.229878	0.356499	0.388686	0.0598969	0.233915	0.419738	0.58759	0.670991	0.889795	0.832238	-0.568684	-0.500953	0.15054	-0.581796	-0.168412	-0.48407	green	0.626945	protein_coding
SEL1L3	141.328	16.2059	125.122	-108.917	0.356195	-0.333748	0.0585768	0.333983	0.309056	0.427089	0.0626469	0.2911	0.354079	0.879528	0.711377	0.790542	0.747286	-0.414973	-0.429158	0.125081	-0.602191	-0.131106	-0.375116	purple	0.662421	protein_coding
HSP90B1	15.1894	1.41269	13.7767	-12.364	0.152338	-0.130707	-0.214224	0.115178	-0.115549	0.519212	0.475993	0.0350979	0.0702525	0.173889	0.253482	0.243648	0.348668	-0.105229	-0.266709	-0.0251727	-0.335265	-0.445526	0.0782443	grey	0.286939	protein_coding
ACTC1	50.8847	29.5207	21.364	8.15675	-0.00542293	0.423781	0.250861	-0.615598	-0.39072	-0.367098	-0.423544	-0.361979	-0.101217	-0.394433	-0.370577	-0.171231	-0.540846	0.307289	-0.0607901	0.184968	0.731279	0.341651	-0.17425	brown	-0.31179	protein_coding
POSTN	59.1917	21.5106	37.6811	-16.1705	-0.15216	-0.579093	-0.431766	-0.127463	-0.23428	0.368622	-0.0376483	0.136098	-0.079246	0.0994231	0.672567	0.533467	0.468072	-0.0741539	0.00184375	0.0190022	-0.45244	-0.273352	-0.195347	red	0.644357	protein_coding
STEAP4	67.6938	20.4775	47.2162	-26.7387	0.387782	-0.210614	0.0619178	0.231169	0.345957	0.345264	0.176816	0.327131	-0.00890998	0.336159	0.51891	0.655435	0.696474	-0.560592	-0.324023	0.302323	-0.523508	-0.11344	-0.52224	green	0.305359	protein_coding
HSPB6	134.319	32.3345	101.985	-69.6502	-0.513543	0.0510775	0.0517337	-0.5547	-0.312391	-0.557482	-0.435753	-0.317789	-0.511288	-0.404903	-0.479855	-0.638211	-0.779077	0.356577	0.544868	0.358575	0.707076	0.644668	-0.149349	brown	-0.435559	protein_coding
APOD	17.7947	3.89574	13.899	-10.0032	0.123916	-0.0992487	0.113396	0.0991224	0.307084	0.0390601	-0.137267	0.602808	0.720815	0.243183	0.153407	0.352344	0.164315	-0.215103	-0.105968	0.0805591	-0.314442	0.0809765	-0.0156723	grey60	0.0575495	protein_coding
LUM	151.229	47.3154	103.914	-56.5984	0.503648	-0.0873631	0.127227	0.269402	0.23356	0.366952	-0.00708054	0.325765	0.6159	0.690638	0.648868	0.776195	0.632422	-0.266831	-0.571957	-0.00777687	-0.563267	-0.334497	-0.0965138	green	0.501207	protein_coding
MEOX2	189.134	20.3774	168.757	-148.379	0.705281	0.125964	0.349954	0.473767	0.540179	0.40708	0.297939	0.511917	0.495436	0.47343	0.375446	0.698158	0.66185	-0.610429	-0.610498	0.252727	-0.554843	-0.175894	-0.31462	yellow	0.111856	protein_coding
CHIT1	65.49	28.3168	37.1732	-8.8564	-0.0112878	-0.516481	-0.374043	0.275213	-0.0305838	0.622802	0.323048	0.572313	0.158849	0.255208	0.637939	0.467863	0.521502	-0.212665	-0.099484	0.12349	-0.713736	-0.390369	0.0274645	brown	0.424859	protein_coding
DUSP5	83.8376	34.3123	49.5252	-15.2129	0.193448	-0.321712	-0.0430676	0.129113	-0.00686383	0.539543	0.0478574	0.46045	0.316998	0.418895	0.624442	0.756003	0.462919	-0.193219	-0.431955	0.33607	-0.545665	-0.169706	-0.233776	green	0.364604	protein_coding
SNX10	190.964	93.2282	97.7361	-4.50796	0.0812311	-0.568795	-0.415411	0.225242	-0.0312106	0.601589	0.225314	0.403879	0.166043	0.34807	0.913692	0.63332	0.686031	-0.163776	-0.217786	-0.14712	-0.856913	-0.531378	0.0646399	red	0.66822	protein_coding
PLTP	132.53	71.4148	61.1156	10.2992	0.069537	-0.530382	-0.230322	0.01003	0.00962245	0.403851	-0.10128	0.0942991	0.132062	0.571956	0.884528	0.727284	0.641021	-0.272049	-0.143632	0.150248	-0.541508	-0.129436	-0.392202	red	0.78449	protein_coding
RTN1	48.2313	5.38543	42.8458	-37.4604	0.478715	0.608026	0.538352	0.418584	0.538044	-0.340765	0.0978137	-0.180688	0.247604	0.180397	-0.521297	-0.203799	0.00390618	-0.223314	-0.224616	-0.161773	0.254821	0.1056	-0.00152114	magenta	-0.378798	protein_coding
FOXD1	61.0981	15.824	45.2741	-29.4501	0.409239	-0.138122	0.0523426	0.273997	0.280228	0.358797	0.209116	0.579115	0.158611	0.148054	0.489636	0.583102	0.57674	-0.396708	-0.409904	0.204187	-0.629338	-0.260294	-0.219092	brown	0.0789116	protein_coding
RBP4	31.9904	12.5286	19.4618	-6.93311	0.14741	0.475632	0.409109	-0.077256	0.0903476	-0.333202	-0.0120399	0.142239	-0.00411124	-0.164505	-0.615769	-0.377502	-0.478125	0.174705	-0.141967	-0.127248	0.475138	0.273905	0.0773725	red	-0.616604	protein_coding
TNFAIP6	50.5907	18.3856	32.2051	-13.8195	0.289532	-0.075973	-0.00779746	-0.00310474	-0.109539	0.361456	-0.0587809	0.591604	0.511009	0.00266121	0.514006	0.641658	0.331599	-0.105926	-0.431316	0.208508	-0.4376	-0.314361	0.026142	green	0.168347	protein_coding
MEOX1	129.553	64.0992	65.4543	-1.35513	0.427039	-0.189231	0.290343	0.317887	0.360236	0.210707	-0.182428	0.499867	0.416609	0.635877	0.543139	0.865709	0.655249	-0.419412	-0.464058	0.277032	-0.479582	0.0291174	-0.423715	green	0.426393	protein_coding
ELOVL7	132.08	62.0183	70.0613	-8.043	0.435081	-0.162673	0.0923294	0.0917368	0.420956	0.309949	0.0146467	0.383571	0.534582	0.373767	0.540622	0.847398	0.699454	-0.570367	-0.400253	0.0964672	-0.549596	-0.103518	-0.464257	green	0.420989	protein_coding
CLEC2B	192.572	81.4247	111.147	-29.7222	0.331833	-0.367169	-0.183455	0.673043	0.359255	0.558791	0.353146	0.410936	0.358544	0.519539	0.742092	0.670311	0.910394	-0.464496	-0.300362	-0.124278	-0.918211	-0.548481	0.041163	brown	0.598818	protein_coding
CTSB	178.825	108.459	70.3669	38.0917	0.0403192	-0.572064	-0.374017	-0.00991159	-0.16688	0.540242	0.0155548	0.151078	0.12063	0.457998	0.959022	0.722644	0.638924	-0.135418	-0.220926	0.0382573	-0.65316	-0.368664	-0.177847	red	0.810792	protein_coding
CCN1	19.3014	3.36399	15.9374	-12.5734	0.137754	-0.035795	0.0649757	-0.00795244	-0.0542572	0.234968	-0.105164	0.333761	0.246922	-0.0324619	0.317085	0.427746	0.101031	-0.0609197	-0.28311	0.310349	-0.247981	-0.0109314	-0.132203	grey	0.00281003	protein_coding
PLCXD3	73.6056	24.5767	49.0289	-24.4522	0.189566	-0.36277	-0.224396	0.0505585	0.13665	0.449793	0.229667	0.0429787	-0.0305962	0.263209	0.608822	0.623287	0.707562	-0.455883	-0.218896	0.0321775	-0.519661	-0.215318	-0.444803	green	0.603279	protein_coding
THEMIS2	113.379	69.9579	43.4216	26.5363	0.0449361	-0.432338	-0.356566	0.0446283	-0.115241	0.540585	0.079898	0.292697	0.221384	0.222737	0.852595	0.578442	0.488224	-0.127532	-0.179542	-0.0279987	-0.66027	-0.415013	0.0261224	red	0.564497	protein_coding
GADD45G	39.6171	17.9818	21.6353	-3.65348	0.0438393	0.387465	0.198055	-0.405695	0.085455	-0.458595	-0.109892	-0.562167	-0.335211	-0.336384	-0.517562	-0.373264	-0.346353	0.00527316	0.112192	-0.125944	0.601718	0.329005	-0.306757	brown	-0.38142	protein_coding
SYNC	110.072	49.4399	60.6324	-11.1926	0.276203	0.744395	0.589474	-0.341204	-0.0230034	-0.478216	-0.307507	-0.234906	0.129187	-0.251986	-0.638477	-0.277	-0.597987	0.189536	-0.250912	0.0342179	0.775436	0.428091	-0.0925987	brown	-0.589844	protein_coding
LAYN	109.457	57.428	52.0295	5.39846	0.0178895	0.606798	0.462572	-0.300963	-0.0862213	-0.678664	-0.496739	-0.423523	-0.0718533	-0.348722	-0.649143	-0.451186	-0.630725	0.29318	0.0615864	-0.0807721	0.834931	0.483911	0.0257708	brown	-0.451973	protein_coding
PELI1	88.1502	11.5794	76.5708	-64.9913	0.107606	-0.297499	-0.468064	0.0531884	-0.154115	0.904917	0.596712	0.366807	0.334423	0.0545533	0.579488	0.499512	0.436512	-0.174454	-0.335291	-0.0305071	-0.706976	-0.634504	0.151925	lightcyan	0.328191	protein_coding
INPP5A	106.279	54.7869	51.4919	3.29499	0.0521553	0.533461	0.62891	-0.28484	-0.0102873	-0.673932	-0.580498	-0.252781	-0.248797	-0.268756	-0.56398	-0.327931	-0.605064	0.0830513	0.0955687	0.557542	0.84062	0.768834	-0.353798	brown	-0.570013	protein_coding
TMEM119	125.023	58.3621	66.6614	-8.29928	0.304839	-0.255828	0.0605029	-0.0260205	0.0296531	0.465883	-0.0756891	0.351398	0.402541	0.569921	0.666363	0.861415	0.518465	-0.214727	-0.534952	0.174409	-0.460556	-0.111875	-0.325241	green	0.561359	protein_coding
CCL13	157.984	57.448	100.536	-43.0875	0.24312	-0.379807	-0.15846	0.334568	0.156498	0.635641	0.221238	0.569623	0.51267	0.558707	0.760087	0.709014	0.6333	-0.291029	-0.373993	0.169771	-0.825682	-0.379253	-0.00561546	brown	0.466589	protein_coding
H2BC8	37.2016	16.738	20.4636	-3.72553	-0.26595	0.111134	-0.191724	-0.167261	-0.173444	0.0730534	0.391622	-0.0805381	-0.210481	-0.354895	-0.41336	-0.623335	-0.479094	0.164172	0.304122	0.0374309	0.209196	-0.0246624	0.294267	green	-0.435764	protein_coding
COL13A1	72.9884	20.6635	52.3249	-31.6614	0.252056	0.747284	0.410302	-0.333101	-0.0842835	-0.310156	-0.195309	-0.42258	0.133299	-0.422853	-0.544634	-0.231901	-0.491516	0.123376	-0.212651	0.0153585	0.669099	0.237228	-0.0221815	black	-0.485344	protein_coding
CLIC2	300.202	87.752	212.45	-124.698	0.697095	0.0848414	0.241488	0.245669	0.384228	0.414926	0.0931907	0.397714	0.745211	0.478051	0.557783	0.908185	0.71777	-0.474438	-0.729653	0.0280478	-0.591225	-0.324245	-0.222703	green	0.365612	protein_coding
PRG4	57.6806	18.5932	39.0873	-20.4941	0.506644	0.174281	0.290749	0.308831	0.216072	0.122939	-0.0496363	0.372504	0.655033	0.235872	0.287263	0.503703	0.344044	-0.139667	-0.522029	0.0594123	-0.364789	-0.230471	0.0967291	blue	0.0250137	protein_coding
SLC10A4	42.9703	17.2409	25.7294	-8.48847	0.390043	0.739345	0.49406	0.051717	0.173438	-0.274053	-0.081021	-0.187765	0.129941	-0.396949	-0.458341	-0.158142	-0.252038	-0.119531	-0.240685	0.0101272	0.425991	0.20224	-0.00257553	black	-0.458213	protein_coding
ELL2	33.1851	4.95865	28.2264	-23.2678	-0.154431	-0.357453	-0.616342	-0.144946	-0.179616	0.581163	0.544098	-0.0903991	-0.155046	-0.0641362	0.296204	0.121149	0.314161	-0.0779067	0.0134326	-0.271682	-0.408891	-0.549808	0.0592974	pink	0.330062	protein_coding
CCL5	69.497	36.0815	33.4155	2.66595	0.0598934	-0.503246	-0.176653	0.213918	0.0553271	0.371424	0.0128557	0.416854	0.189054	0.591754	0.756508	0.552299	0.530146	-0.215613	-0.141299	0.0888022	-0.58982	-0.176362	-0.160173	red	0.609515	protein_coding
IFIT3	189.462	68.5433	120.919	-52.3755	0.519094	-0.0485753	0.0856699	0.190271	0.105262	0.51406	0.0587296	0.279397	0.479544	0.423565	0.713391	0.862649	0.656214	-0.353171	-0.617329	0.157236	-0.541248	-0.330327	-0.213487	green	0.483101	protein_coding
VEGFD	9.49566	1.59215	7.90351	-6.31135	0.248534	0.0644735	0.186461	0.124604	0.351512	-0.0553233	0.0631858	0.283105	0.40776	0.432082	-0.0880974	0.137954	0.184015	-0.171931	-0.196816	-0.135593	-0.113273	-0.00411511	-0.0874945	grey	0.000974844	protein_coding
CNN1	197.38	91.8716	105.508	-13.6368	-0.1417	0.55522	0.345602	-0.419127	-0.208662	-0.656769	-0.389269	-0.419487	-0.214357	-0.438749	-0.80731	-0.647684	-0.821309	0.430497	0.169056	-0.0524865	0.927858	0.456136	0.0832071	brown	-0.624562	protein_coding
CRYBG1	244.938	99.6083	145.33	-45.7219	0.241964	-0.472853	-0.182619	0.237297	0.111392	0.567044	0.0646785	0.432104	0.344301	0.54194	0.929395	0.878747	0.777663	-0.348421	-0.36532	0.0620762	-0.785911	-0.352717	-0.210242	red	0.720833	protein_coding
HS3ST2	33.0221	12.2833	20.7388	-8.45543	-0.0220309	-0.419197	-0.262421	0.0390739	-0.0224134	0.141936	-0.0781975	-0.057406	-0.157419	0.221156	0.581132	0.391907	0.493813	-0.102604	-0.0517755	-0.178323	-0.376871	-0.139145	-0.218308	red	0.580655	protein_coding
SLPI	66.7664	10.9176	55.8487	-44.9311	0.478027	0.0842267	0.140491	0.375788	0.459971	0.294232	0.189329	0.480605	0.90888	0.355644	0.267191	0.544277	0.504586	-0.439505	-0.39415	-0.0888417	-0.498802	-0.254407	0.0164036	grey60	0.179915	protein_coding
NID2	212.932	74.8157	138.116	-63.3001	0.559585	-0.0551212	0.0964836	0.19744	0.264544	0.558846	0.14564	0.35751	0.654697	0.580596	0.639495	0.889761	0.689065	-0.404782	-0.65795	0.0541246	-0.596136	-0.342303	-0.22643	green	0.456933	protein_coding
FGR	105.576	53.012	52.5641	0.447958	7.8723e-05	-0.512829	-0.506973	-0.0756542	-0.152368	0.632692	0.294258	0.359379	0.188986	0.120178	0.804362	0.512219	0.478128	-0.10407	-0.184836	-0.177588	-0.719421	-0.49349	0.0602289	red	0.512029	protein_coding
LYVE1	75.7862	15.2939	60.4923	-45.1984	0.531802	0.0972553	0.00932627	0.43032	0.496773	0.456437	0.583473	0.232358	0.398242	0.286272	0.30277	0.321399	0.575848	-0.490555	-0.396709	-0.187506	-0.607542	-0.434322	0.0366928	brown	0.0723925	protein_coding
CSF1R	182.998	104.093	78.9045	25.1884	0.111135	-0.531154	-0.345407	0.250588	-0.0158859	0.597893	0.192907	0.290045	0.146496	0.504469	0.936483	0.627408	0.668261	-0.183446	-0.247716	-0.0346061	-0.790694	-0.44473	-0.0184739	red	0.682704	protein_coding
PLPPR4	167.611	58.2917	109.319	-51.0276	0.520802	0.0792132	0.262717	0.0592903	0.13875	0.427192	-0.0174485	0.580882	0.660754	0.33164	0.434107	0.83695	0.392	-0.252803	-0.702025	0.244045	-0.405405	-0.155522	-0.206373	green	0.148799	protein_coding
IGDCC4	106.445	10.421	96.0236	-85.6027	0.570187	0.193289	0.497277	0.331484	0.432698	0.10392	-0.0877744	0.269297	0.578491	0.767604	0.181814	0.572326	0.369899	-0.276235	-0.596365	0.130651	-0.189023	0.0567742	-0.256018	purple	0.12841	protein_coding
RPL22L1	97.2547	8.05928	89.1954	-81.1362	0.445401	-0.145666	0.00788178	0.778558	0.484425	0.386991	0.342754	0.292318	0.2911	0.50167	0.476862	0.562913	0.876805	-0.515634	-0.345307	-0.210664	-0.704456	-0.433997	-0.0289137	lightgreen	0.476919	protein_coding
VAT1L	16.8869	1.81573	15.0712	-13.2554	0.246847	0.393186	0.41208	0.0150846	0.0244876	-0.157877	-0.243015	0.0321059	0.335313	-0.0125909	-0.145583	0.060366	-0.202169	0.0317126	-0.215718	0.175502	0.253009	0.19016	0.0769976	grey	-0.199951	protein_coding
CRLF1	29.8145	12.5385	17.276	-4.73743	-0.479863	-0.302588	-0.409413	-0.387801	-0.386789	-0.0627841	0.0389085	0.110743	-0.34262	-0.457156	-0.0861975	-0.35515	-0.312304	0.255101	0.43091	0.0194286	0.106482	-0.00881035	0.10078	blue	-0.145618	protein_coding
DUSP27	77.8905	35.5441	42.3463	-6.80222	-0.170503	0.387713	0.411709	-0.171608	-0.0795668	-0.591463	-0.482836	-0.49608	-0.242078	-0.145565	-0.593858	-0.456853	-0.621742	0.22872	0.231433	0.270844	0.779713	0.63799	-0.126601	brown	-0.359725	protein_coding
LXN	114.392	38.0693	76.3225	-38.2533	0.433445	-0.184636	0.215092	0.510193	0.458982	0.177231	-0.112721	0.303437	0.509662	0.800704	0.554068	0.750916	0.76351	-0.404892	-0.398074	-0.00321491	-0.553028	-0.152617	-0.209846	green	0.579196	protein_coding
MARCO	127.629	55.2994	72.33	-17.0306	0.133106	-0.547499	-0.249935	0.28365	0.232529	0.414133	0.128505	0.183276	0.052328	0.571049	0.82418	0.638451	0.790507	-0.420068	-0.10754	0.0117614	-0.703059	-0.237681	-0.317522	red	0.704832	protein_coding
GDF15	18.2982	2.73988	15.5583	-12.8185	0.170251	-0.146256	0.354211	0.461857	0.309426	-0.276041	-0.383884	0.139341	-0.102958	0.431542	0.238738	0.321179	0.383116	-0.242426	-0.0402825	0.330575	-0.134809	0.268971	-0.338194	grey	0.235738	protein_coding
ADIPOQ	55.8176	12.8577	42.9599	-30.1022	0.42529	0.0831006	0.301389	0.237906	0.259377	0.228858	-0.0116092	0.869627	0.516735	0.0946755	0.271871	0.573567	0.301198	-0.296629	-0.489695	0.237504	-0.398848	-0.0169984	-0.0966245	greenyellow	-0.094155	protein_coding
HBA2	8.63644	1.4571	7.17934	-5.72225	-0.0243638	-0.166154	-0.175762	0.232104	-0.238777	0.352305	0.209738	0.0692754	-0.113506	0.103552	0.282688	0.125874	0.129299	0.117958	-0.162835	0.0220862	-0.227821	-0.228165	0.132328	grey	0.172761	protein_coding
CXCL13	32.7348	18.4405	14.2943	4.14615	0.196181	-0.161324	0.156429	0.373316	0.37799	0.188626	0.0956713	-0.0697478	0.139437	0.900415	0.247802	0.301241	0.41751	-0.343663	-0.139388	0.162873	-0.222416	0.1045	-0.33486	purple	0.431522	protein_coding
WDR11	76.5982	31.3233	45.2749	-13.9516	0.225214	-0.0964223	-0.391468	0.212474	0.114739	0.818546	0.880458	0.123147	0.289167	0.125655	0.268985	0.232215	0.474983	-0.340664	-0.275326	-0.272243	-0.592096	-0.64848	0.178882	pink	0.263186	protein_coding
PLA2G7	140.148	74.49	65.6579	8.83211	-0.103813	-0.6325	-0.528685	0.192537	-0.181391	0.626495	0.210736	0.21034	0.0296575	0.245954	0.887147	0.515205	0.606578	-0.122349	-0.0242891	-0.00145788	-0.753085	-0.496959	0.0886024	red	0.715848	protein_coding
SFRP2	100.307	48.2873	52.0199	-3.7326	0.344338	-0.154767	0.182769	0.0559574	0.219309	0.235296	-0.265292	0.337851	0.673042	0.631456	0.60479	0.804759	0.452405	-0.250553	-0.440331	0.183557	-0.418078	-0.00784715	-0.282948	green	0.439174	protein_coding
NR4A2	56.1189	13.8184	42.3005	-28.4821	0.360975	-0.0822692	0.0236038	0.247728	0.109373	0.469856	0.247362	0.653245	0.392902	0.114499	0.405061	0.558651	0.399113	-0.195469	-0.474694	0.15244	-0.588771	-0.394481	0.0603829	green	0.0123182	protein_coding
NRN1	109.751	51.8107	57.9403	-6.12958	0.416906	-0.144311	0.352889	0.258213	0.40218	0.0688327	-0.30572	0.416339	0.510703	0.707735	0.472212	0.812449	0.592985	-0.390266	-0.446056	0.262363	-0.395568	0.127307	-0.452586	green	0.42789	protein_coding
FMO1	136.39	43.7806	92.609	-48.8284	0.411235	-0.210091	0.196855	0.358806	0.306787	0.366957	-0.0218117	0.697274	0.581959	0.689234	0.597815	0.782317	0.58673	-0.289251	-0.529525	0.157816	-0.643137	-0.140961	-0.139015	green	0.357721	protein_coding
UCP2	144.397	88.325	56.0719	32.2531	0.0500839	-0.540302	-0.345728	0.0243701	-0.135902	0.604585	0.10648	0.260588	0.213015	0.47602	0.914493	0.662982	0.560876	-0.161348	-0.21476	0.108957	-0.649084	-0.326511	-0.144351	red	0.710952	protein_coding
CCN5	25.1317	4.1119	21.0198	-16.9079	-0.222795	-0.00957045	0.17409	-0.28595	0.0242551	-0.528131	-0.552586	-0.222577	-0.0164867	0.186008	-0.206326	-0.184309	-0.300501	0.167247	0.277407	0.0133219	0.421765	0.469295	-0.183715	pink	0.0211563	protein_coding
DES	108.204	34.7622	73.4413	-38.6791	-0.37475	0.196227	0.10724	-0.401878	-0.140954	-0.632586	-0.405769	-0.392926	-0.420104	-0.448608	-0.610174	-0.633263	-0.645461	0.265607	0.486949	0.083138	0.722755	0.533865	-0.0805835	brown	-0.425751	protein_coding
SOX9	74.8833	29.9087	44.9746	-15.0659	0.248766	-0.330388	-0.103234	0.114834	0.20742	0.564427	0.265569	0.458638	0.31063	0.43844	0.524664	0.704018	0.572732	-0.372079	-0.396338	0.09483	-0.611344	-0.227291	-0.294402	green	0.373682	protein_coding
REEP1	211.152	81.6281	129.524	-47.8958	-0.0962218	0.617763	0.307319	-0.325907	-0.140979	-0.536241	-0.16138	-0.537853	-0.265105	-0.494617	-0.861016	-0.726909	-0.779763	0.321205	0.203992	-0.0541223	0.893524	0.365861	0.120668	brown	-0.660024	protein_coding
H2AC18	21.8474	3.05145	18.796	-15.7445	-0.236403	-0.112108	-0.309858	0.0766986	0.0169385	0.253572	0.48907	0.147024	0.0736808	-0.133241	-0.168059	-0.390279	-0.167654	0.005536	0.300002	-0.082362	-0.168351	-0.210813	0.387098	grey	-0.19273	protein_coding
CST6	16.9164	1.70417	15.2122	-13.508	0.210234	0.467694	0.373082	0.207816	-0.00520798	-0.309102	-0.146115	-0.247492	-0.170964	-0.294714	-0.30833	-0.193662	-0.156325	0.0428847	-0.0885121	0.111302	0.373372	0.147169	0.0609698	grey	-0.308151	protein_coding
SLMAP	109.789	36.3333	73.4556	-37.1223	0.479865	0.867034	0.485463	-0.177136	0.0382852	-0.227916	0.00759941	-0.050192	0.286661	-0.463884	-0.574118	-0.201476	-0.436826	0.104456	-0.448893	-0.0603834	0.465483	0.0174826	0.14565	black	-0.740691	protein_coding
PTPRZ1	66.6089	18.9619	47.647	-28.6851	0.369316	-0.158488	0.135773	0.352813	0.269017	0.265889	-0.0737995	0.225415	0.265071	0.670137	0.627497	0.665919	0.61019	-0.357829	-0.373531	0.142675	-0.463584	-0.121588	-0.29456	green	0.496451	protein_coding
MYBL1	183.577	48.6681	134.909	-86.2407	-0.361227	0.341024	0.111565	-0.298366	-0.132345	-0.568721	-0.227849	-0.496731	-0.37007	-0.483184	-0.75254	-0.802846	-0.757215	0.274937	0.537633	-0.00938671	0.80398	0.46588	0.0822578	brown	-0.509711	protein_coding
VEGFC	141.523	61.2162	80.3066	-19.0904	0.498052	0.0241416	0.188123	0.189758	0.207327	0.359268	-0.0817325	0.334326	0.658316	0.393796	0.564575	0.850294	0.570337	-0.346833	-0.580224	0.0973824	-0.462682	-0.215827	-0.174163	green	0.39915	protein_coding
ACKR1	81.0178	47.4338	33.584	13.8497	0.216825	-0.301232	0.150189	0.142826	0.325803	0.0915244	-0.30665	0.200586	0.271865	0.564338	0.536189	0.769395	0.613102	-0.448233	-0.193195	0.258317	-0.345725	0.177068	-0.591189	green	0.57679	protein_coding
SLC22A3	16.3175	4.72122	11.5963	-6.87508	0.148877	0.397618	0.0924313	0.00673009	0.00502791	0.0317316	0.347877	-0.428997	-0.160674	-0.0895591	-0.4673	-0.300839	-0.127054	-0.0262324	-0.124955	-0.193412	0.35549	-0.0314549	-0.0292866	red	-0.159617	protein_coding
FBP1	169.315	83.2193	86.0957	-2.87645	-0.140577	-0.714317	-0.523633	0.161187	-0.124871	0.54524	0.13364	0.327781	0.0455478	0.260667	0.903816	0.54873	0.605377	-0.140491	0.0140247	-0.0275981	-0.784714	-0.413334	0.00619465	red	0.707225	protein_coding
GCH1	259.949	57.9657	201.983	-144.018	0.702139	0.134298	0.239827	0.402702	0.410684	0.522502	0.286139	0.59634	0.656478	0.340477	0.466599	0.8047	0.636936	-0.48027	-0.738304	0.0191415	-0.634555	-0.368431	-0.113754	green	0.134904	protein_coding
SNAI2	80.156	14.5873	65.5687	-50.9814	0.50112	0.0696306	0.0869957	0.0189455	0.258459	0.310298	0.199064	-0.03824	0.09781	0.131497	0.389518	0.597771	0.646126	-0.569406	-0.411538	0.14909	-0.301213	-0.154783	-0.508185	yellow	0.340373	protein_coding
ADRA2C	218.277	79.9685	138.309	-58.3402	-0.542643	0.109324	-0.181519	-0.391966	-0.268175	-0.437474	-0.0176343	-0.505097	-0.491395	-0.496256	-0.711178	-0.896833	-0.733532	0.422803	0.587816	-0.236176	0.650612	0.263565	0.215191	green	-0.426687	protein_coding
HCLS1	122.946	48.8674	74.0783	-25.2108	0.164853	-0.443061	-0.387802	0.132079	0.146414	0.627299	0.388489	0.197227	0.185559	0.351861	0.785814	0.575935	0.72786	-0.436722	-0.177731	-0.10781	-0.7338	-0.405575	-0.200285	red	0.639435	protein_coding
FST	175.889	78.6978	97.1907	-18.4928	0.637409	0.307385	0.439727	0.313441	0.243629	0.19031	-0.115098	0.506409	0.697096	0.311877	0.293178	0.670031	0.329815	-0.188026	-0.730054	0.113995	-0.318746	-0.177525	-0.00848312	turquoise	-0.0220368	protein_coding
THRSP	19.0306	9.59068	9.43995	0.150736	0.211695	-0.0700887	0.168117	0.130913	0.0963067	0.162436	-0.0488463	0.795984	0.220829	0.0818071	0.222276	0.420705	0.202713	-0.152682	-0.297848	0.211055	-0.273444	0.00369703	-0.126497	greenyellow	-0.0582236	protein_coding
AIF1	189.075	85.8367	103.238	-17.4018	0.0792964	-0.585994	-0.316828	0.446407	0.0416705	0.609569	0.192643	0.311292	0.217326	0.684246	0.898876	0.650122	0.738537	-0.190539	-0.228286	-0.034532	-0.824384	-0.445333	0.0364258	red	0.777782	protein_coding
PLBD1	203.448	65.0387	138.41	-73.3711	0.318213	-0.338375	-0.181115	0.296362	0.102886	0.52439	0.121649	0.464669	0.560264	0.445752	0.837973	0.779555	0.718007	-0.211289	-0.465874	-0.138533	-0.824769	-0.530204	0.0817206	red	0.581619	protein_coding
ASB2	185.892	69.702	116.19	-46.4885	-0.287081	0.404014	0.189175	-0.326715	-0.231849	-0.67309	-0.335323	-0.555973	-0.322949	-0.414545	-0.769217	-0.765497	-0.767095	0.438975	0.362359	-0.15373	0.873614	0.40856	0.160148	brown	-0.474288	protein_coding
ADGRL4	159.345	74.236	85.1092	-10.8732	0.510888	-0.091838	0.162206	0.245343	0.417598	0.345962	-8.01395e-05	0.379267	0.57762	0.453112	0.562181	0.901761	0.751482	-0.579133	-0.45972	0.136727	-0.540083	-0.143757	-0.430237	green	0.466275	protein_coding
COL8A1	34.8939	14.5514	20.3425	-5.79114	0.255752	0.510895	0.46601	-0.426748	-0.080472	-0.402697	-0.346796	-0.32865	-0.204619	-0.301886	-0.307867	-0.0593215	-0.273713	-0.0536248	-0.144037	0.405728	0.606461	0.410636	-0.441552	brown	-0.278714	protein_coding
PLAT	107.44	51.8543	55.5854	-3.73112	0.449073	-0.0266382	0.219039	0.208469	0.216701	0.282125	-0.147791	0.195541	0.604755	0.562557	0.501456	0.830486	0.573231	-0.327436	-0.526449	0.145912	-0.358755	-0.111539	-0.296835	green	0.481268	protein_coding
BAMBI	90.7783	21.2716	69.5067	-48.2352	-0.0174567	0.544711	0.257336	-0.0539973	-0.112261	-0.289685	0.0598448	-0.260835	-0.0664265	-0.351123	-0.746666	-0.599526	-0.645525	0.310452	0.042198	-0.0390054	0.606993	0.163795	0.278534	brown	-0.659799	protein_coding
TM6SF1	204.792	57.847	146.945	-89.0985	0.428002	-0.21735	-0.0140226	0.199708	0.156215	0.451479	0.00909057	0.446172	0.538205	0.339276	0.821191	0.884208	0.721369	-0.370929	-0.49574	0.0647988	-0.688893	-0.340583	-0.166461	red	0.546562	protein_coding
NPR3	45.8421	22.6929	23.1491	-0.456187	0.56716	0.342401	0.452778	0.442195	0.571098	0.00421409	0.0202245	-0.0549542	0.486131	0.461725	0.022363	0.384534	0.442943	-0.510369	-0.365837	-0.0221172	-0.0652519	0.0813567	-0.280748	blue	0.183163	protein_coding
MSX1	23.0219	2.67061	20.3513	-17.6807	0.284964	0.258818	0.186915	-0.102708	-0.0094426	0.151968	-0.0683179	0.370441	0.704859	-0.0262201	-0.00908784	0.347108	-0.0141507	-0.0144358	-0.428018	-0.0567785	-0.0193114	-0.0896729	0.107674	grey60	-0.0582564	protein_coding
TMEM176A	126.177	52.1008	74.0765	-21.9757	0.26368	-0.378026	-0.0419218	0.203249	0.278323	0.276794	-0.125368	0.15987	0.436696	0.663372	0.740133	0.811536	0.773642	-0.41669	-0.249047	0.0288169	-0.562689	-0.135485	-0.362701	green	0.76787	protein_coding
PTGS2	53.1997	22.1262	31.0735	-8.9473	0.322019	-0.136773	0.12069	0.110131	0.0373613	0.224009	-0.171798	0.334485	0.345704	0.327492	0.541065	0.702379	0.426081	-0.132629	-0.458158	0.0563719	-0.349688	-0.13222	-0.207566	green	0.376181	protein_coding
CRISPLD1	71.0454	14.7167	56.3287	-41.6121	0.416261	0.668584	0.62195	-0.0911677	0.0930019	-0.277884	-0.298921	-0.158817	0.285663	-0.0727562	-0.350193	0.0537334	-0.296006	-0.000961506	-0.340932	0.256598	0.492706	0.27857	-0.123573	black	-0.398863	protein_coding
RGS4	14.6966	1.10342	13.5932	-12.4898	0.0572299	0.139707	0.29308	-0.0438786	-0.192502	-0.0909665	-0.357271	0.347978	0.133286	-0.138945	0.0223995	0.160117	-0.231986	0.121711	-0.133601	0.481138	0.156617	0.237905	-0.0499807	cyan	-0.212868	protein_coding
C12orf75	52.6065	29.9235	22.6831	7.2404	-0.0337533	0.367703	0.354104	-0.332243	-0.173744	-0.555738	-0.555848	-0.428322	-0.160157	-0.0663652	-0.393857	-0.25669	-0.472841	0.307136	0.0578401	0.0601811	0.717653	0.383352	-0.0726454	brown	-0.21157	protein_coding
MAMDC2	31.9225	2.42019	29.5023	-27.0821	0.478301	0.301082	0.341308	0.195577	0.495138	0.0942616	0.164289	0.584522	0.65814	0.0544082	-0.0136216	0.22669	0.118745	-0.398411	-0.313665	0.18	-0.266405	0.0168704	-0.0400246	grey60	-0.352137	protein_coding
PLEKHG1	191.462	55.0332	136.428	-81.3951	0.522427	0.0809229	0.14367	0.0504817	0.0184406	0.47624	0.0399447	0.412524	0.570396	0.232505	0.515335	0.822354	0.45391	-0.180649	-0.768598	0.0794755	-0.459314	-0.316209	-0.101362	green	0.236208	protein_coding
GDF10	98.8218	42.3119	56.51	-14.1981	0.609184	0.653744	0.548761	0.0113284	0.172795	-0.115755	-0.197151	0.236938	0.669726	-0.191912	-0.118286	0.328424	-0.0315933	-0.106463	-0.586248	0.0299214	0.10408	0.00479904	0.0360609	blue	-0.326685	protein_coding
APCDD1	29.3797	12.2553	17.1244	-4.86919	0.0715197	0.418721	0.151153	-0.246377	0.0837062	-0.229456	0.142824	0.112915	0.209039	-0.491433	-0.594696	-0.394977	-0.443832	0.102761	-0.0385663	-0.253397	0.318411	0.101063	0.171349	red	-0.630106	protein_coding
MCUB	249.724	65.9056	183.818	-117.912	0.559035	-0.11773	-0.00216172	0.361723	0.293378	0.504434	0.205894	0.41739	0.654652	0.492623	0.689725	0.851056	0.821912	-0.386693	-0.637186	-0.216616	-0.748833	-0.506202	-0.042164	green	0.534552	protein_coding
CTSC	120.84	7.12232	113.718	-106.596	0.153191	-0.540029	-0.143166	0.457427	0.260347	0.378144	0.0631339	0.200596	0.108426	0.744946	0.740523	0.698171	0.841404	-0.364312	-0.187042	0.00565156	-0.689194	-0.255321	-0.254101	lightgreen	0.772318	protein_coding
PAMR1	22.8446	2.31753	20.527	-18.2095	0.265797	0.160728	0.0343505	-0.235755	-0.137398	0.170329	-0.0713937	0.31149	0.669181	-0.138948	0.183954	0.395374	0.0849146	0.0277068	-0.407186	0.00289081	-0.177996	-0.263439	0.142881	grey60	0.0208795	protein_coding
DNER	61.8495	8.85596	52.9936	-44.1376	0.478718	0.697511	0.609919	0.292353	0.437627	-0.38727	0.0180341	-0.278399	0.081034	0.0424212	-0.554631	-0.234568	-0.123017	-0.156896	-0.264956	-0.165367	0.397032	0.230884	-0.0557097	magenta	-0.387547	protein_coding
ATF3	16.9247	5.36259	11.5622	-6.19956	0.0646342	0.0972732	0.222473	-0.0894912	-0.215871	-0.0286438	-0.359892	0.284791	0.196248	-0.0515488	0.090772	0.247435	-0.220791	0.265698	-0.277055	0.281689	0.0541216	0.0836662	0.0568493	turquoise	-0.218232	protein_coding
TSPAN8	65.1181	34.0881	31.03	3.05812	0.631134	0.469201	0.42361	0.229798	0.569551	0.0453096	0.198285	0.556384	0.684486	-0.0397831	-0.195766	0.297129	0.238628	-0.519665	-0.410954	0.160263	-0.167515	-0.0771949	-0.133356	blue	-0.416756	protein_coding
TMEM35A	101.68	29.8536	71.8265	-41.9729	0.250192	0.761189	0.585997	-0.220396	0.0242441	-0.455491	-0.231945	-0.0826952	0.116959	-0.333859	-0.725076	-0.376077	-0.648088	0.20222	-0.226866	0.182959	0.674352	0.37038	0.0521452	brown	-0.806379	protein_coding
CYYR1	159.87	76.8938	82.9757	-6.0819	0.413188	-0.221623	0.177565	0.159478	0.347728	0.274208	-0.137969	0.402501	0.507582	0.602632	0.627641	0.898536	0.69836	-0.463131	-0.471138	0.182851	-0.544688	-0.0269789	-0.459455	green	0.5453	protein_coding
SERPINE1	11.0357	1.86168	9.17397	-7.31229	-0.119634	-0.17603	-0.224863	-0.260337	-0.250884	0.0269572	-0.154356	0.0528247	-0.207122	-0.371898	0.316277	0.138784	0.063993	0.00813802	0.0656422	0.0338551	-0.0684348	-0.0107003	-0.1457	grey	0.158106	protein_coding
HMCN1	71.4826	25.6906	45.7919	-20.1013	0.522899	0.600251	0.373609	-0.297785	-0.0984573	0.00336656	-0.0721836	-0.259778	0.24724	-0.118946	-0.0610743	0.229761	-0.0735925	-0.0243805	-0.552609	0.0873125	0.306419	-0.00507067	-0.187325	blue	-0.142158	protein_coding
CXCL8	56.3322	24.983	31.3492	-6.36619	0.12004	-0.397288	-0.257283	0.421032	0.240503	0.48716	0.332862	0.399321	0.358182	0.404371	0.591492	0.418549	0.603521	-0.381298	-0.0653227	0.0384581	-0.729028	-0.384292	0.050449	brown	0.464338	protein_coding
OLFML2A	132.691	47.284	85.407	-38.1229	0.391229	-0.152893	0.103012	0.190844	0.208112	0.373551	-0.0524799	0.778289	0.777797	0.330572	0.597484	0.803309	0.495715	-0.270594	-0.503576	0.143452	-0.644514	-0.228351	-0.047627	green	0.249996	protein_coding
LVRN	49.9718	23.4415	26.5302	-3.08871	0.542554	0.455536	0.468723	0.192701	0.295967	-0.212278	-0.140696	0.534838	0.636945	-0.046828	-0.131162	0.227567	0.0713604	-0.0721611	-0.480336	-0.0628263	-0.0809871	-0.101715	0.160667	blue	-0.385883	protein_coding
PLAUR	152.209	93.9257	58.2833	35.6423	0.0732464	-0.485042	-0.347374	-0.018617	-0.137624	0.570578	0.052914	0.288077	0.171351	0.282743	0.923004	0.699331	0.557466	-0.152975	-0.239069	0.00566838	-0.66174	-0.388029	-0.0950772	red	0.649427	protein_coding
HSD11B1	46.7078	7.10671	39.601	-32.4943	0.479901	0.149077	0.208774	0.448637	0.534607	0.149228	0.195987	0.168291	0.725637	0.573627	0.135058	0.357031	0.457439	-0.348812	-0.380369	-0.298892	-0.376248	-0.232601	0.0657117	brown	0.201218	protein_coding
SLC14A1	11.1009	1.59411	9.50677	-7.91266	0.237683	0.371374	0.275036	-0.099234	-0.0858637	-0.214173	-0.0952275	-0.354291	-0.271701	-0.239297	-0.14644	-0.0747067	-0.0493998	-0.0659131	-0.134274	0.232771	0.343396	0.158963	-0.239608	black	-0.120302	protein_coding
AKAP9	32.6613	19.2521	13.4092	5.84282	0.183866	0.0957782	-0.194104	0.118733	0.136954	0.470822	0.801525	0.120324	0.0387025	-0.079761	-0.0831422	-0.159479	0.124656	-0.213527	-0.164204	-0.0951118	-0.312433	-0.373682	0.153533	pink	-0.209813	protein_coding
CRYZ	20.6415	1.95992	18.6815	-16.7216	0.255217	0.406006	0.38597	0.302048	0.21531	-0.0995289	0.146646	-0.12367	-0.0115211	0.0944539	-0.367105	-0.208427	-0.133568	-0.0824312	-0.142973	0.0318557	0.251975	0.164079	0.0460765	green	-0.267179	protein_coding
VLDLR	31.1928	9.53056	21.6623	-12.1317	0.21215	0.442143	0.525982	0.00133363	0.0619609	-0.463998	-0.494306	-0.31598	-0.0289086	0.167507	-0.251317	-0.0603566	-0.263146	0.14557	-0.181442	0.13814	0.492996	0.368429	-0.154294	brown	-0.219953	protein_coding
CCL21	42.667	19.6487	23.0183	-3.36959	0.131392	-0.248024	0.0665916	0.00137305	0.0504499	0.238331	-0.276618	0.0614896	0.299355	0.644473	0.569941	0.626153	0.356546	-0.164968	-0.217194	0.237546	-0.253979	0.0198958	-0.294243	green	0.558986	protein_coding
TPPP3	37.7881	2.99626	34.7918	-31.7956	0.296958	0.0874054	0.246131	0.171957	0.0937716	0.210752	-0.145873	0.582814	0.644683	0.12731	0.270193	0.51023	0.136165	-0.142195	-0.351106	0.382848	-0.260479	-0.0298837	-0.0110405	grey60	-0.0851601	protein_coding
ITGA6	166.745	75.8214	90.9239	-15.1025	0.486454	-0.0970789	0.266118	0.276561	0.369738	0.296763	-0.128815	0.657747	0.691133	0.446783	0.568536	0.900558	0.626765	-0.461025	-0.509042	0.315502	-0.578619	-0.0946874	-0.278042	green	0.313843	protein_coding
MARCKSL1	84.4963	45.2293	39.267	5.96225	0.223818	-0.225032	0.18387	0.0496055	0.0675085	0.221037	-0.357661	0.324735	0.382807	0.498243	0.62698	0.79794	0.411305	-0.225347	-0.345156	0.479189	-0.342063	0.101638	-0.376498	green	0.44258	protein_coding
IL7R	99.0751	41.232	57.843	-16.611	-0.060559	-0.591935	-0.409383	0.337402	0.0401048	0.492657	0.163695	0.449301	0.289832	0.496069	0.765819	0.464828	0.564804	-0.100463	-0.0491803	-0.239323	-0.778196	-0.472201	0.220862	red	0.630833	protein_coding
CCDC102B	137.666	53.8574	83.809	-29.9517	0.474502	-0.111236	0.262034	0.185931	0.224327	0.327972	-0.0837917	0.412281	0.411247	0.650845	0.539543	0.846408	0.573813	-0.300749	-0.605066	0.241193	-0.439924	-0.0525823	-0.369052	green	0.40389	protein_coding
TREM2	103.085	62.5849	40.5003	22.0846	-0.131138	-0.611987	-0.400285	0.162171	-0.252957	0.428832	-0.0699362	0.33179	0.0670015	0.330683	0.863217	0.522916	0.438076	0.10502	-0.0879074	-0.0532756	-0.635377	-0.386382	0.127634	red	0.616274	protein_coding
AOX1	61.8722	6.63822	55.234	-48.5958	0.511914	0.134687	0.12768	0.256961	0.501297	0.240371	0.310089	0.494795	0.788803	0.253739	0.121603	0.42125	0.439899	-0.402656	-0.430416	-0.184232	-0.48804	-0.322633	0.0129778	grey60	-0.0280237	protein_coding
NOSTRIN	153.693	62.4061	91.2868	-28.8807	0.321934	-0.322283	0.0798224	0.352906	0.301436	0.376892	-0.0581138	0.649037	0.552218	0.504803	0.67113	0.869004	0.691807	-0.413001	-0.395326	0.19936	-0.708644	-0.146295	-0.22646	green	0.491771	protein_coding
ZWINT	63.1934	17.8013	45.3921	-27.5908	0.223666	-0.294653	-0.177168	0.0875797	-0.0568782	0.553202	0.228097	-0.0122349	0.164856	0.611469	0.606391	0.604361	0.529327	-0.0608722	-0.472299	-0.212449	-0.462181	-0.386685	-0.101864	red	0.619194	protein_coding
COL4A2	85.9795	46.9085	39.071	7.83744	-0.277897	0.165903	0.216067	-0.661562	-0.255398	-0.490676	-0.457046	-0.409021	-0.435509	-0.207574	-0.467397	-0.352092	-0.631298	0.261308	0.250507	0.244942	0.807008	0.656924	-0.417395	brown	-0.281338	protein_coding
IGFBPL1	73.6931	34.3558	39.3374	-4.98161	0.116304	0.597733	0.553129	-0.163587	0.0617604	-0.725046	-0.59553	-0.372466	-0.00892916	-0.298724	-0.500029	-0.323646	-0.481949	0.122811	0.0678751	0.0668121	0.747072	0.56429	-0.10847	brown	-0.400237	protein_coding
AMIGO2	118.58	49.9812	68.5986	-18.6174	0.296442	0.772562	0.579665	-0.254321	0.0215824	-0.472701	-0.240357	-0.350825	0.0473046	-0.253776	-0.667938	-0.339778	-0.569224	0.173288	-0.194471	0.0800583	0.75783	0.331089	-0.029431	brown	-0.640576	protein_coding
SMAD1	296.781	58.5308	238.25	-179.719	0.749979	0.224937	0.412212	0.136974	0.307298	0.238941	-0.0457793	0.214427	0.495757	0.450024	0.443323	0.838467	0.600574	-0.385024	-0.80805	0.117805	-0.341954	-0.127178	-0.381049	green	0.289512	protein_coding
ABCA6	75.189	6.77561	68.4134	-61.6378	0.374976	-0.111113	-0.0732097	0.245526	0.357423	0.422347	0.299351	0.52892	0.775042	0.369246	0.402215	0.536989	0.539124	-0.332224	-0.378571	-0.186394	-0.678874	-0.437791	0.099173	grey60	0.239065	protein_coding
SMPX	97.7499	32.621	65.1289	-32.508	-0.170661	0.470401	0.361134	-0.140858	-0.181832	-0.589952	-0.411862	-0.304071	-0.26606	-0.403856	-0.639505	-0.604443	-0.770715	0.41942	0.203863	0.0298786	0.742936	0.449327	0.198511	brown	-0.579208	protein_coding
C1orf162	93.223	30.4391	62.7839	-32.3449	0.201027	-0.315186	-0.392267	0.209524	0.0768688	0.644152	0.477424	0.148831	0.206974	0.210175	0.702201	0.457471	0.651082	-0.294138	-0.253065	-0.25786	-0.744087	-0.575359	0.0854073	red	0.527874	protein_coding
HPGDS	193.029	55.4127	137.616	-82.2033	0.461605	-0.160274	0.023238	0.372585	0.136366	0.522275	0.115886	0.504054	0.620011	0.518331	0.714655	0.806979	0.651734	-0.211138	-0.620132	-0.0516133	-0.706586	-0.446055	0.047581	green	0.440876	protein_coding
P2RX7	192.586	103.041	89.5451	13.4955	0.0155857	-0.662111	-0.328598	0.225334	-0.00951739	0.473569	0.0140598	0.284777	0.0816637	0.522138	0.941159	0.709262	0.723857	-0.216768	-0.137392	0.0179487	-0.728353	-0.288152	-0.186875	red	0.807147	protein_coding
LGI1	70.7834	22.5437	48.2397	-25.6961	0.488746	0.693144	0.566215	0.0629907	0.15733	-0.156329	-0.170031	-0.00297192	0.569502	0.0281591	-0.326682	0.0846108	-0.20509	0.00930389	-0.478975	0.0498285	0.300676	0.0857682	0.1122	blue	-0.359903	protein_coding
CDH19	16.9453	5.51367	11.4316	-5.91796	0.195901	0.00210897	-0.00411701	0.0305084	0.139058	0.259799	0.260555	0.727214	0.421016	-0.0557175	0.0828886	0.168477	0.078948	-0.13185	-0.274926	0.087681	-0.386212	-0.151808	0.0768642	greenyellow	-0.251364	protein_coding
CALCRL	121.736	66.7699	54.9662	11.8038	0.337745	-0.24442	0.209282	0.162578	0.195106	0.264179	-0.235082	0.49684	0.439998	0.588624	0.605811	0.875924	0.573023	-0.311299	-0.448824	0.349543	-0.460292	-0.014325	-0.371536	green	0.461105	protein_coding
LMOD1	207.147	76.3604	130.787	-54.4263	-0.170578	0.515084	0.307395	-0.315468	-0.0654721	-0.703605	-0.286217	-0.591228	-0.365349	-0.417629	-0.844479	-0.766407	-0.734987	0.301838	0.311791	-0.0642313	0.887074	0.483464	0.0365969	brown	-0.597699	protein_coding
PDGFRL	110.208	31.7773	78.4304	-46.6532	0.495936	0.0340199	0.195148	0.367932	0.329827	0.305445	0.0172918	0.504252	0.826914	0.476752	0.434133	0.67378	0.500297	-0.265868	-0.528244	0.0294499	-0.557495	-0.318878	0.0646319	green	0.193272	protein_coding
PHLDA2	76.0543	15.358	60.6963	-45.3383	0.560366	0.307591	0.286446	-0.115074	0.0359098	0.169239	-0.0613785	0.218291	0.351433	-0.0802506	0.259643	0.593771	0.286227	-0.237608	-0.587404	0.0913757	-0.0851752	-0.12225	-0.269036	green	0.0759937	protein_coding
DHRS3	37.8028	3.30889	34.4939	-31.185	0.170058	-0.316393	-0.267284	0.362736	0.236936	0.476943	0.540318	0.0433218	-0.0848307	0.353187	0.372539	0.318259	0.694405	-0.443715	-0.124802	0.00429845	-0.572762	-0.398809	-0.211541	lightgreen	0.417348	protein_coding
AIF1L	23.0748	3.86737	19.2074	-15.3401	0.181411	0.205203	0.535522	-0.0159517	0.36019	-0.595543	-0.47592	0.0884277	-0.0595765	0.0856751	-0.28413	0.0210313	-0.0228188	-0.228799	0.00687758	0.285465	0.353569	0.62055	-0.503818	magenta	-0.190553	protein_coding
C7	45.3736	6.49868	38.8749	-32.3762	0.292087	-0.262251	-0.00207837	0.221745	0.334654	0.259643	0.142004	-0.0125426	0.0908466	0.691787	0.431903	0.540297	0.672919	-0.371715	-0.307096	-0.0412256	-0.442631	-0.125076	-0.406151	purple	0.52787	protein_coding
DSP	130.539	52.6476	77.8917	-25.2441	0.347229	-0.241528	-0.0719735	-0.0053464	0.0150748	0.563136	0.114536	0.406352	0.30053	0.229752	0.717656	0.834654	0.59527	-0.30383	-0.511981	0.136741	-0.591082	-0.308836	-0.248273	green	0.444764	protein_coding
PCSK1	8.81666	2.71147	6.1052	-3.39373	0.0143087	-0.152891	-0.0717145	0.0946017	0.186871	-0.110786	0.0345134	-0.11372	-0.220503	0.173267	0.075729	0.0198768	0.238642	-0.100795	0.0280273	-0.199906	-0.130821	-0.0300982	-0.177864	grey	0.126519	protein_coding
GORAB	220.246	110.55	109.696	0.854571	0.806311	0.328906	0.459548	0.426868	0.526167	0.12429	0.123922	0.190441	0.489358	0.446865	0.233401	0.618723	0.658726	-0.501262	-0.69395	-0.0651563	-0.330376	-0.189013	-0.237692	blue	0.206397	protein_coding
SLC7A2	59.5343	16.2037	43.3306	-27.1268	-0.0403368	-0.508134	-0.452307	-0.188037	-0.0847023	0.585385	0.340919	0.143864	-0.16924	0.0903928	0.591806	0.47665	0.496693	-0.294456	-0.073771	0.151338	-0.534697	-0.277936	-0.371227	brown	0.44492	protein_coding
ZFAND5	43.8771	3.69633	40.1808	-36.4844	0.165522	-0.0666973	-0.40291	-0.185283	-0.172756	0.718736	0.632583	0.251604	0.187199	-0.256105	0.277533	0.27533	0.222648	-0.0577556	-0.375678	-0.16428	-0.483456	-0.657624	0.175533	lightcyan	-0.0195367	protein_coding
MS4A1	33.2423	18.6248	14.6175	4.00731	0.178681	-0.188867	0.142711	0.413638	0.39718	0.172611	0.0781951	-0.0265978	0.173477	0.89991	0.266116	0.297371	0.431661	-0.342074	-0.109135	0.134119	-0.257094	0.0885066	-0.285901	purple	0.441687	protein_coding
CHMP4C	102.77	23.3441	79.4257	-56.0816	0.349605	0.77696	0.644385	0.0333808	0.314661	-0.55086	-0.159408	-0.414954	-0.0465269	-0.164641	-0.680102	-0.405939	-0.371916	-0.135674	-0.0389652	0.114032	0.686002	0.451104	-0.176723	black	-0.55326	protein_coding
PRUNE2	188.446	75.1202	113.326	-38.2059	-0.0711489	0.585695	0.237985	-0.322255	-0.0700063	-0.456577	0.0129397	-0.567184	-0.305641	-0.453693	-0.88084	-0.723285	-0.679714	0.231129	0.180804	-0.150566	0.832871	0.30886	0.0534423	red	-0.616947	protein_coding
PLD5	232.238	94.4494	137.788	-43.3391	-0.168369	0.505834	0.288709	-0.248719	-0.0966447	-0.635279	-0.175224	-0.495072	-0.428969	-0.445961	-0.911304	-0.773693	-0.729487	0.35027	0.263975	-0.111677	0.865649	0.399218	0.0910457	red	-0.650651	protein_coding
SLC38A6	207.932	45.1619	162.77	-117.608	0.580294	-0.0775997	0.0575789	0.288195	0.208461	0.514944	0.247929	0.363057	0.367438	0.453057	0.70048	0.760275	0.721448	-0.331368	-0.676393	-0.033695	-0.689007	-0.416252	-0.133897	green	0.437181	protein_coding
CP	54.6172	13.1654	41.4518	-28.2864	-0.429579	-0.701829	-0.533729	-0.0904667	-0.140839	0.350433	0.103641	-0.161784	-0.350734	0.423248	0.500601	0.149393	0.279315	-0.0789614	0.363231	0.0558206	-0.314935	-0.0812997	-0.236836	black	0.628833	protein_coding
PTGFR	81.9924	7.99217	74.0002	-66.0081	0.557946	0.131996	0.53636	0.407999	0.479521	-0.0552812	-0.200871	0.768401	0.52351	0.371857	0.183854	0.595799	0.408298	-0.341324	-0.504642	0.238356	-0.333765	0.0697491	-0.216913	greenyellow	-0.070173	protein_coding
RGS18	11.4937	2.40228	9.09142	-6.68914	0.0231371	-0.15613	-0.311292	-0.347944	-0.149745	0.433073	0.330114	0.0776827	0.119468	-0.0407347	0.306696	0.14785	0.0953893	-0.0878638	-0.0762233	-0.0454945	-0.233702	-0.257552	-0.019219	grey	0.170954	protein_coding
CYSLTR1	19.7699	6.55165	13.2183	-6.66662	0.00228685	-0.218474	0.163414	0.0902515	0.0180987	0.144884	-0.253669	0.232619	0.215518	0.51469	0.289726	0.412632	0.129044	-0.0952681	-0.0999367	0.435789	-0.122757	0.198839	-0.227639	green	0.28418	protein_coding
NFKBIZ	66.0365	12.8624	53.1741	-40.3117	0.305502	-0.00266318	-0.349251	-0.121815	0.00381286	0.774669	0.70348	0.131136	0.443198	-0.0341978	0.331632	0.389325	0.39934	-0.307017	-0.396562	-0.219331	-0.492336	-0.614447	0.059675	pink	0.222607	protein_coding
OSR1	50.2339	17.1752	33.0587	-15.8835	0.22574	0.569709	0.631264	-0.144516	0.234936	-0.560288	-0.395785	-0.157159	0.222541	-0.0984552	-0.559688	-0.177041	-0.404634	-0.116901	-0.0300377	0.393894	0.641175	0.65401	-0.350972	brown	-0.469516	protein_coding
CMPK2	132.57	51.0357	81.5345	-30.4988	0.521928	0.108049	0.207808	0.138734	0.0958289	0.430509	-0.0135109	0.2666	0.534285	0.267955	0.542572	0.797877	0.467953	-0.306385	-0.624421	0.205435	-0.380379	-0.206093	-0.182667	green	0.315116	protein_coding
HHEX	104.186	39.983	64.203	-24.22	0.295832	-0.354743	0.117576	0.221337	0.251532	0.25683	-0.0964671	0.312777	0.202819	0.631338	0.675706	0.769693	0.662389	-0.390165	-0.339575	0.234901	-0.50966	0.0403937	-0.489759	green	0.597941	protein_coding
BCHE	82.8286	43.7004	39.1282	4.57217	0.479077	0.29802	0.119804	-0.136779	0.00276511	0.429918	0.152631	0.24514	0.668277	0.0132109	0.18625	0.560531	0.170909	-0.13809	-0.664753	-0.035671	-0.197402	-0.305549	-0.029024	turquoise	-0.0123253	protein_coding
IRF8	116.359	62.9285	53.4301	9.49841	0.0522413	-0.567924	-0.18193	0.289991	0.044761	0.383356	-0.0320525	0.245255	0.0735671	0.6787	0.852456	0.61659	0.61315	-0.155781	-0.194934	0.0471157	-0.638839	-0.1691	-0.182867	red	0.729729	protein_coding
SLA	104.242	57.9844	46.2579	11.7264	0.0400924	-0.456138	-0.481136	-0.107806	-0.15678	0.594897	0.216575	0.140737	0.153036	0.202302	0.824926	0.553941	0.533927	-0.134506	-0.195013	-0.168412	-0.638348	-0.494181	-0.0389987	red	0.619766	protein_coding
ZNF423	196.581	39.7808	156.8	-117.019	0.737955	0.295655	0.425382	0.218442	0.458541	0.224424	0.00921299	0.337239	0.724002	0.328892	0.300438	0.772615	0.531354	-0.48351	-0.688545	0.0240285	-0.309149	-0.106531	-0.281133	green	0.141196	protein_coding
P2RY14	76.3514	27.4642	48.8872	-21.4229	0.581495	0.277773	0.299165	0.253832	0.35082	0.186648	0.139789	0.770403	0.562102	-0.120088	0.209552	0.426654	0.291774	-0.33509	-0.528185	0.0482647	-0.439131	-0.192978	0.0452519	blue	-0.26011	protein_coding
CSTA	130.674	42.9105	87.7635	-44.8529	0.298609	-0.354122	-0.142601	0.556688	0.275331	0.575943	0.301948	0.375017	0.416921	0.724253	0.727236	0.626096	0.740706	-0.288446	-0.377395	-0.204968	-0.795368	-0.451493	0.0782332	brown	0.594903	protein_coding
SNRPA1	86.1238	23.8657	62.2581	-38.3924	0.389474	-0.057862	-0.204623	0.284692	0.254343	0.771334	0.820281	0.136654	0.127749	0.263933	0.326849	0.370448	0.611473	-0.500756	-0.395565	-0.060362	-0.601719	-0.511966	-0.0920985	pink	0.267388	protein_coding
BHLHE40	13.6785	2.6153	11.0632	-8.44786	0.00741205	-0.328391	0.0758501	0.135184	0.0471101	-0.0259563	-0.197587	0.121463	-0.232039	0.449468	0.298307	0.30578	0.294297	-0.0892634	-0.0470154	0.323926	-0.157348	0.118935	-0.362752	grey	0.271271	protein_coding
FMO3	27.6135	8.10111	19.5123	-11.4112	0.307094	-0.165574	0.158682	0.241856	0.36516	-0.0191063	-0.155834	0.317313	0.18861	0.391533	0.443198	0.530938	0.542711	-0.347491	-0.23053	0.0339433	-0.412272	-0.00709072	-0.309632	green	0.301054	protein_coding
CXCL2	123.946	45.6631	78.2827	-32.6196	0.210645	-0.379208	-0.130357	0.252523	0.0348032	0.571957	0.0760849	0.282071	0.343504	0.609158	0.79274	0.758938	0.638798	-0.283356	-0.340282	0.20231	-0.627847	-0.293208	-0.179355	red	0.671377	protein_coding
MYOZ2	57.1424	13.7343	43.4081	-29.6739	0.159649	0.684756	0.321701	-0.262863	-0.128768	-0.339885	-0.152199	-0.312671	0.0796592	-0.466258	-0.549843	-0.364432	-0.550038	0.242409	-0.135871	-0.203821	0.638353	0.151657	0.170498	black	-0.503205	protein_coding
ANXA3	81.193	42.3177	38.8753	3.44245	0.636186	0.594751	0.524813	0.218516	0.413171	-0.0706162	0.0675804	0.215107	0.703888	0.120942	-0.229496	0.204601	0.0971898	-0.262924	-0.517305	-0.155658	0.0487847	-0.015582	0.025785	blue	-0.216853	protein_coding
EGFL6	56.1315	29.7018	26.4297	3.27208	0.17763	-0.32356	-0.0649138	-0.0182055	0.0880408	0.448948	0.0659303	0.27987	0.19876	0.363077	0.531524	0.702921	0.483111	-0.280972	-0.311768	0.116832	-0.421006	-0.100526	-0.366438	green	0.436826	protein_coding
SLC40A1	37.6839	10.1421	27.5418	-17.3996	-0.409308	-0.177892	-0.31265	0.04248	-0.16511	0.100107	0.414963	-0.387795	-0.539203	0.0232198	-0.337607	-0.55835	-0.209296	0.15734	0.402302	-0.101682	0.169329	-0.0496594	0.17698	green	-0.0157257	protein_coding
HAPLN1	15.5618	1.64412	13.9177	-12.2736	0.167433	0.339821	0.171855	-0.429248	-0.291286	-0.0743951	-0.285213	-0.12895	0.268977	-0.188003	0.00500662	0.150716	-0.256934	0.220635	-0.325464	-0.123876	0.32302	0.0616836	-0.0055869	grey	-0.00804965	protein_coding
MYH10	33.3946	11.4233	21.9712	-10.5479	-0.18324	0.282583	-0.00666212	-0.270434	-0.343421	-0.00550156	0.0760763	-0.438843	-0.0932651	-0.111936	-0.497237	-0.406743	-0.55142	0.394064	0.0221276	-0.0468502	0.529965	0.0264302	0.188388	brown	-0.293727	protein_coding
CNTN4	156.844	50.0694	106.774	-56.705	0.39322	0.851823	0.735382	-0.110085	0.150347	-0.611202	-0.337151	-0.211038	0.0802215	-0.225973	-0.725011	-0.321181	-0.521645	0.135826	-0.270797	0.0770717	0.748775	0.413535	-0.0566168	brown	-0.713413	protein_coding
MICU3	196.229	101.028	95.2006	5.82781	0.767921	0.755954	0.477935	0.148221	0.347872	0.0127294	0.336637	-0.0912527	0.252519	-0.0118308	-0.314646	0.0622102	0.0952216	-0.1986	-0.662172	-0.258238	0.118759	-0.208211	0.000417625	blue	-0.414302	protein_coding
KLF9	24.973	8.46939	16.5036	-8.03421	0.272179	0.197543	-0.133251	-0.256184	-0.0124832	0.334656	0.375478	0.0985139	0.0474522	-0.416161	0.0891869	0.153496	0.136995	-0.222708	-0.271909	0.037457	-0.182683	-0.296932	-0.105935	blue	-0.19303	protein_coding
IL10RA	155.275	78.453	76.8216	1.63137	-0.0141842	-0.639454	-0.387218	0.243178	0.0748106	0.521689	0.154867	0.41403	0.198043	0.477915	0.884055	0.578688	0.643318	-0.266189	-0.0438278	0.0080566	-0.796842	-0.3221	-0.092318	red	0.67202	protein_coding
PIK3R3	56.5691	20.6674	35.9016	-15.2342	0.353806	-0.111731	0.0777802	-0.0211153	0.286814	0.258471	0.0994031	0.430192	0.235194	0.0834542	0.388542	0.618853	0.518069	-0.47256	-0.356135	0.055598	-0.403598	-0.00921832	-0.443322	green	0.243438	protein_coding
TUBE1	318.497	147.427	171.07	-23.6427	0.843616	0.683138	0.463533	0.139414	0.335207	0.151303	0.317795	0.125835	0.528815	0.030765	-0.123222	0.312808	0.227618	-0.252496	-0.829677	-0.158832	-0.104523	-0.280792	-0.0065608	blue	-0.293411	protein_coding
TSPAN2	126.108	36.7555	89.3521	-52.5966	0.522371	0.85315	0.721785	-0.102043	0.217201	-0.541309	-0.282737	-0.337554	0.163895	-0.181897	-0.565711	-0.162594	-0.305123	-0.0355516	-0.337672	0.0390884	0.645924	0.338569	-0.137878	black	-0.493377	protein_coding
TENT5B	87.8782	44.058	43.8202	0.23778	-0.130454	0.302597	0.226095	-0.396423	-0.0434631	-0.612484	-0.297434	-0.666925	-0.522961	-0.2546	-0.582599	-0.499354	-0.442677	0.13291	0.294109	-0.012862	0.784596	0.472229	-0.29944	brown	-0.290047	protein_coding
CD72	56.2325	40.3663	15.8662	24.5001	-0.100323	-0.454591	-0.320308	-0.0840607	-0.256388	0.257197	-0.18934	-0.0728868	-0.0696463	0.257988	0.780118	0.438158	0.356333	0.0440132	-0.0302024	-0.0146377	-0.37449	-0.221646	-0.0962797	red	0.644247	protein_coding
MPZL2	36.6213	13.8496	22.7717	-8.92209	0.124946	-0.204317	-0.223508	-0.249753	-0.102962	0.64514	0.300398	0.33454	0.295014	0.0301659	0.398332	0.571134	0.275977	-0.217174	-0.328633	0.139199	-0.386836	-0.242444	-0.235791	green	0.23914	protein_coding
GPM6B	22.9616	4.46567	18.4959	-14.0302	0.360874	0.211586	0.259884	-0.0286902	0.245448	0.0419438	-0.102771	0.564419	0.782156	0.0461249	0.0413923	0.383449	0.0571066	-0.166786	-0.352822	0.00276313	-0.141142	-0.0260789	-0.0127923	grey60	-0.155988	protein_coding
BCAT1	209.548	89.9369	119.611	-29.674	0.190561	-0.496528	-0.374102	0.22679	0.0447587	0.651004	0.265912	0.346314	0.347717	0.472561	0.902805	0.736163	0.763677	-0.239283	-0.33418	-0.222831	-0.852746	-0.592087	0.0191946	red	0.740381	protein_coding
GPAM	40.1883	5.26865	34.9197	-29.6511	0.44598	0.250827	0.454648	0.0292778	0.235494	0.01664	-0.162706	0.6673	0.372463	-0.0108058	0.0407504	0.488646	0.135087	-0.251405	-0.48856	0.234316	-0.0813044	0.175962	-0.271857	greenyellow	-0.199234	protein_coding
VNN2	36.6671	10.1072	26.5599	-16.4528	-0.0449274	-0.305782	-0.455193	0.23466	0.0500717	0.534924	0.613972	0.1988	0.0836927	0.0964869	0.330571	-0.00959422	0.328413	-0.190448	0.0670989	-0.144101	-0.56745	-0.472681	0.279279	pink	0.211327	protein_coding
ALKAL2	46.7848	18.6786	28.1063	-9.42772	0.324449	-0.146226	-0.0532151	0.32616	0.404496	0.359088	0.372951	0.520069	0.222321	0.0938272	0.347899	0.392132	0.536132	-0.45923	-0.240151	0.0735409	-0.651685	-0.273484	-0.113136	brown	0.0347812	protein_coding
MFAP4	115.27	56.3831	58.8874	-2.50427	-0.0686692	0.472701	0.540084	-0.39722	-0.12683	-0.733631	-0.723633	-0.296075	-0.0661289	-0.252143	-0.537663	-0.345081	-0.715073	0.312046	0.118494	0.321523	0.835603	0.712181	-0.167323	brown	-0.495097	protein_coding
TNFSF10	178.364	74.9896	103.375	-28.3851	0.490017	-0.167725	0.220013	0.26407	0.328317	0.273085	-0.108733	0.503668	0.595306	0.614326	0.609762	0.896384	0.702207	-0.367137	-0.568692	0.0767024	-0.5831	-0.142208	-0.277395	green	0.50406	protein_coding
ELN	59.69	22.9008	36.7891	-13.8883	-0.13604	0.427359	0.139907	-0.415518	-0.232962	-0.362506	-0.0782806	-0.41411	-0.225368	-0.633458	-0.595061	-0.549708	-0.637337	0.218985	0.188568	0.0634572	0.672467	0.370628	-0.0142702	brown	-0.517149	protein_coding
MX2	121.665	42.9951	78.67	-35.675	0.338517	-0.103408	-0.0717771	-0.0306562	-0.117346	0.602528	0.0812297	0.283482	0.525626	0.357519	0.667729	0.763075	0.4185	-0.0981208	-0.600312	0.0834822	-0.497771	-0.382854	-0.0317546	green	0.398807	protein_coding
TAC1	67.6007	8.49011	59.1106	-50.6205	0.406997	-0.0790774	0.0936841	0.522004	0.483724	0.323538	0.30278	0.796651	0.490282	0.186141	0.302394	0.473318	0.533616	-0.449966	-0.342295	0.030005	-0.681747	-0.258038	-0.000474695	greenyellow	-0.0204814	protein_coding
FUS	10.609	1.95482	8.65418	-6.69937	-0.0256912	-0.0732355	0.220755	0.162677	0.0269638	0.106835	-0.0766242	0.229815	-0.071319	0.406301	-0.0216286	0.111006	-0.053218	-0.0752969	-0.055311	0.57776	0.0351147	0.272215	-0.226167	cyan	-0.041655	protein_coding
MRAP2	165.713	73.445	92.2676	-18.8226	0.0286335	0.645971	0.418648	-0.234807	0.00585036	-0.663058	-0.260551	-0.606766	-0.22906	-0.390253	-0.799888	-0.619689	-0.599022	0.169079	0.180496	-0.0547452	0.879454	0.437926	-0.0265535	brown	-0.525203	protein_coding
CORO1A	68.7982	36.1595	32.6387	3.52082	-0.0873877	-0.594751	-0.196107	0.205192	0.0806831	0.314715	-0.0689024	0.153242	0.0316056	0.670184	0.742615	0.486763	0.491402	-0.218357	0.053377	0.0643575	-0.47102	0.00595071	-0.259094	red	0.745494	protein_coding
LGMN	202.355	75.0666	127.288	-52.2216	0.357241	-0.347424	-0.109649	0.219189	0.130837	0.545659	0.113517	0.280171	0.366278	0.605245	0.874259	0.834993	0.76619	-0.344752	-0.459896	0.0934632	-0.717844	-0.330351	-0.26812	red	0.666805	protein_coding
CA2	77.7369	26.5035	51.2334	-24.73	0.183656	-0.369402	-0.354845	-0.0073116	0.0455245	0.685824	0.465721	0.440555	0.155608	0.134991	0.63757	0.562175	0.53916	-0.317157	-0.295719	0.0179216	-0.703768	-0.455165	-0.15349	brown	0.280954	protein_coding
ARHGAP18	243.793	48.6992	195.094	-146.395	0.55665	-0.13609	0.0543462	0.45733	0.335523	0.519036	0.210868	0.469962	0.449347	0.44296	0.7845	0.814934	0.817992	-0.501529	-0.54559	0.0543971	-0.78543	-0.390312	-0.15123	brown	0.474295	protein_coding
SLCO2A1	71.5373	20.529	51.0083	-30.4793	0.035371	-0.483842	-0.275859	-0.0256695	0.142898	0.430696	0.185178	0.509113	0.189701	0.150259	0.555607	0.580329	0.551393	-0.387216	-0.107913	0.0920399	-0.630477	-0.166669	-0.302655	green	0.415999	protein_coding
PRSS35	99.7108	25.4365	74.2743	-48.8377	0.618746	0.79509	0.662194	-0.0410119	0.236428	-0.250192	-0.212878	-0.114169	0.371613	-0.221771	-0.301038	0.167512	-0.121518	-0.224745	-0.473328	0.144832	0.397878	0.23563	-0.203589	black	-0.389495	protein_coding
RASL12	183.457	85.0478	98.4092	-13.3614	-0.268708	0.40598	0.234036	-0.460603	-0.256116	-0.673446	-0.424264	-0.565061	-0.371706	-0.393072	-0.746387	-0.663663	-0.766092	0.432905	0.300716	-0.0325316	0.917632	0.464867	0.0236161	brown	-0.472015	protein_coding
PLA2G2A	78.7306	28.0877	50.643	-22.5553	0.253317	-0.318852	-0.157625	0.114411	0.235017	0.361736	0.0496427	0.107469	0.475332	0.583754	0.63653	0.69353	0.709726	-0.364772	-0.255659	-0.153608	-0.552822	-0.301633	-0.225236	green	0.708825	protein_coding
SAMD4A	16.5397	2.36545	14.1743	-11.8088	0.0733999	0.323341	-0.0716812	-0.152065	-0.177715	0.214034	0.313185	0.00033329	0.231946	-0.359607	-0.308395	-0.136467	-0.303613	0.193646	-0.220144	-0.205432	0.128319	-0.262497	0.279979	grey	-0.417078	protein_coding
SF1	18.2378	5.79059	12.4472	-6.65661	-0.0068044	-0.195297	-0.402012	-0.162666	0.0359313	0.550206	0.620062	0.121943	0.254812	0.0786292	0.109018	0.090041	0.20331	-0.18977	-0.0780834	-0.133649	-0.396007	-0.382142	0.0147457	pink	0.118938	protein_coding
SERPINE2	137.173	8.90799	128.265	-119.357	0.466672	-0.221718	0.0929447	0.629505	0.45438	0.359868	0.149839	0.253256	0.29899	0.735982	0.657423	0.709682	0.868302	-0.508363	-0.382604	0.0582504	-0.687487	-0.295908	-0.217632	lightgreen	0.557457	protein_coding
SHC4	71.2946	30.7472	40.5474	-9.80019	0.57917	0.633045	0.640059	0.10717	0.199416	-0.217113	-0.303093	-0.0464335	0.36201	0.0464538	-0.111663	0.269504	0.0195828	-0.202392	-0.485088	0.251173	0.291277	0.243546	-0.245329	blue	-0.184168	protein_coding
PNP	157.939	36.2013	121.738	-85.5367	0.554822	0.166129	0.232061	0.0368743	0.0778299	0.327109	-0.0597195	0.344324	0.601676	0.228155	0.458146	0.764149	0.409144	-0.166209	-0.748935	-0.079822	-0.334436	-0.228607	-0.112589	green	0.255383	protein_coding
BEX2	46.557	10.9915	35.5654	-24.5739	0.411721	0.609632	0.691297	0.372164	0.475041	-0.51051	-0.222367	0.104456	0.0645468	-0.191677	-0.46661	-0.129853	-0.120315	-0.213738	-0.161098	0.0224314	0.333692	0.417005	-0.102692	magenta	-0.50326	protein_coding
ADAP2	152.65	64.2241	88.4263	-24.2022	-0.0211067	-0.678685	-0.413411	0.296396	0.0191894	0.611994	0.25618	0.270653	0.207983	0.695408	0.837064	0.590234	0.690657	-0.177657	-0.13935	-0.155236	-0.782304	-0.409263	-0.0129318	red	0.828824	protein_coding
ID1	9.29082	1.87631	7.41451	-5.5382	0.0296113	-0.105191	0.150679	-0.00857373	0.0921356	-0.082271	-0.176282	0.379304	-0.0924492	-0.125603	0.0952217	0.22015	0.15136	-0.331124	0.078576	0.554266	-0.0338623	0.332578	-0.453889	grey	-0.00535138	protein_coding
RAB23	125.783	42.4532	83.3302	-40.877	0.475354	0.898621	0.645961	-0.118573	0.168121	-0.472144	-0.23553	-0.105912	0.331144	-0.391396	-0.615713	-0.198057	-0.418745	0.0304821	-0.342686	-0.0657004	0.600032	0.247851	0.0557736	black	-0.653837	protein_coding
SELP	61.3594	34.1694	27.1901	6.97934	0.0671997	-0.439928	-0.00555837	-0.0413944	0.116964	0.176293	-0.236753	0.471882	0.337376	0.460298	0.535617	0.69921	0.450461	-0.23374	-0.188031	0.164977	-0.386556	0.103154	-0.422099	green	0.504704	protein_coding
RBPMS2	25.7424	9.95684	15.7856	-5.82872	-0.0272337	0.375056	0.275158	-0.32204	-0.0307632	-0.453623	-0.344071	-0.0309465	-0.0362611	-0.473361	-0.495722	-0.27913	-0.440319	0.111621	0.0920184	0.028708	0.548686	0.402748	-0.0778308	brown	-0.429431	protein_coding
CARTPT	11.9161	3.9876	7.92852	-3.94092	-0.126537	0.158799	0.0890562	-0.0725753	0.0750012	-0.342277	-0.13704	0.133002	0.247418	-0.193836	-0.477569	-0.264923	-0.303327	0.179566	0.131651	-0.295348	0.245414	0.139616	0.212467	red	-0.287815	protein_coding
CXCL9	5.51427	1.09097	4.4233	-3.33233	0.274408	0.232449	0.189872	-0.18164	0.142918	-0.0765096	-0.0286862	-0.0875508	-0.0810467	-0.21382	0.0996307	0.0770858	0.0323035	-0.21619	-0.135748	-0.0380511	0.0881734	0.169949	-0.248956	grey	-0.0893035	protein_coding
AGT	14.9143	2.12584	12.7885	-10.6626	-0.082593	-0.212974	0.00346227	-0.48298	-0.126752	0.0569138	-0.27327	-0.15569	-0.0715955	0.318936	0.29232	0.292871	-0.00183535	-0.0682361	0.00994875	0.388162	0.0985263	0.291983	-0.521744	grey	0.284617	protein_coding
ADGRF5	151.589	47.5375	104.052	-56.5144	0.164909	-0.454536	-0.300552	0.0363854	-0.00412406	0.71919	0.237986	0.398399	0.378379	0.368928	0.786607	0.815989	0.64412	-0.304727	-0.339777	0.12998	-0.740851	-0.432511	-0.182749	green	0.588314	protein_coding
CD83	151.37	72.4945	78.8757	-6.38116	0.0260261	-0.589628	-0.436489	0.272015	-0.11531	0.639413	0.250764	0.343778	0.164268	0.434958	0.872678	0.589148	0.652331	-0.0906203	-0.215799	-0.132483	-0.800085	-0.554396	0.128606	red	0.716486	protein_coding
TM4SF18	155.561	65.9551	89.6063	-23.6512	0.419415	-0.163862	0.174695	0.298573	0.169147	0.378275	-0.0860644	0.564011	0.585637	0.573985	0.615764	0.864937	0.585193	-0.236539	-0.581456	0.115212	-0.557343	-0.216581	-0.139317	green	0.433463	protein_coding
SBSPON	98.0792	44.0945	53.9847	-9.89017	-0.013361	0.556175	0.479631	-0.251054	-0.0988231	-0.639228	-0.400531	-0.191713	-0.396657	-0.52219	-0.679117	-0.526037	-0.658801	0.18783	0.154385	0.331084	0.813325	0.56812	-0.121692	brown	-0.699022	protein_coding
SPON1	78.711	30.4303	48.2807	-17.8504	0.600179	0.321588	0.476147	0.289862	0.5358	0.0455236	0.0511648	0.360406	0.614237	0.384834	0.0308012	0.401933	0.258981	-0.291719	-0.583904	-0.0613992	-0.245521	0.0395962	-0.125917	turquoise	-0.142694	protein_coding
FIBIN	48.411	13.6932	34.7178	-21.0246	0.217376	0.687877	0.38804	-0.264697	-0.0224814	-0.308511	-0.197828	-0.166924	0.17771	-0.542766	-0.494286	-0.235029	-0.486835	0.0633866	-0.123277	0.142048	0.542255	0.252177	0.00790381	black	-0.597071	protein_coding
KCNA5	115.815	42.2883	73.5268	-31.2384	-0.25908	0.347643	0.103232	-0.381709	-0.189719	-0.567735	-0.248735	-0.65853	-0.417307	-0.390935	-0.664838	-0.678108	-0.646941	0.333538	0.367868	-0.0518526	0.773761	0.30332	0.029312	brown	-0.44562	protein_coding
CDH5	99.7234	50.0586	49.6648	0.393746	0.137268	-0.38383	-0.0393922	-0.169959	-0.0676292	0.396237	-0.169375	0.37013	0.317849	0.455372	0.673634	0.818463	0.422524	-0.13819	-0.424086	0.22986	-0.430471	-0.0110225	-0.416171	green	0.513023	protein_coding
SUSD5	104.52	46.3086	58.2114	-11.9028	0.1906	0.711552	0.380718	-0.423559	-0.0282297	-0.461987	-0.0925428	-0.632065	-0.20689	-0.416911	-0.690602	-0.475602	-0.520455	0.0912143	-0.0242604	0.0390628	0.791745	0.319627	-0.170934	brown	-0.541813	protein_coding
FBLIM1	152.321	86.1894	66.1316	20.0578	-0.159776	0.462276	0.335218	-0.559055	-0.243292	-0.597285	-0.413285	-0.629057	-0.347525	-0.355573	-0.670425	-0.536966	-0.760215	0.342178	0.18194	0.12007	0.941035	0.594276	-0.193782	brown	-0.456858	protein_coding
SORBS1	55.4791	22.3867	33.0925	-10.7058	-0.353084	0.0517685	-0.355658	-0.0832191	-0.155299	0.0437045	0.494195	-0.329612	-0.281727	-0.39075	-0.556514	-0.678658	-0.36898	0.233182	0.324469	-0.387558	0.219413	-0.196795	0.379371	green	-0.307687	protein_coding
CTSZ	80.7017	46.0459	34.6557	11.3902	-0.0314881	-0.521673	-0.252345	-0.0328941	-0.0509183	0.311841	-0.150836	0.156899	0.122539	0.267976	0.808344	0.607642	0.505269	-0.24519	0.00462869	0.231234	-0.486944	-0.0457681	-0.345583	red	0.652687	protein_coding
SGCA	151.42	59.3075	92.1125	-32.805	-0.349421	0.257725	0.22366	-0.446772	-0.185192	-0.615684	-0.383497	-0.499313	-0.431764	-0.270955	-0.637374	-0.673582	-0.749542	0.253103	0.467696	0.317817	0.858964	0.68825	-0.215697	brown	-0.451049	protein_coding
SLC16A14	59.9103	27.7986	32.1117	-4.31318	0.522006	0.146118	0.536416	0.432098	0.636573	-0.0887904	-0.0239938	0.247363	0.175982	0.518741	0.0306438	0.426042	0.446124	-0.481218	-0.394821	0.0434564	-0.161446	0.241143	-0.45686	blue	0.0805005	protein_coding
PYCARD	158.405	68.8067	89.5979	-20.7912	-0.00247767	-0.66303	-0.215768	0.393519	0.16372	0.401539	-0.0397071	0.409467	0.222864	0.646124	0.867376	0.678355	0.702653	-0.333256	-0.0125011	0.156245	-0.729916	-0.156843	-0.201055	red	0.751468	protein_coding
NEXN	138.653	51.4384	87.2141	-35.7757	0.00711114	0.661839	0.240757	-0.422919	-0.203794	-0.371274	-0.0157788	-0.465286	-0.226678	-0.506621	-0.760275	-0.666945	-0.754746	0.335086	0.0272412	-0.0610222	0.784085	0.213742	0.136578	brown	-0.711514	protein_coding
SEMA3C	88.97	41.0892	47.8808	-6.79152	0.595868	0.510784	0.677005	0.252966	0.381412	-0.26814	-0.318455	0.233522	0.70349	0.265786	-0.114052	0.351899	0.0946872	-0.156644	-0.518442	0.15567	0.055745	0.142598	-0.0565358	blue	-0.195738	protein_coding
RRAD	28.8481	9.6732	19.1749	-9.50172	-0.211494	-0.060497	0.164089	-0.211171	-0.100317	-0.423673	-0.402929	-0.463661	-0.499778	0.220388	-0.177579	-0.200349	-0.206648	0.0956256	0.273623	0.299769	0.509291	0.494643	-0.422293	brown	0.0636661	protein_coding
RSAD2	51.7655	22.0329	29.7325	-7.69962	0.341525	0.0879173	0.137871	0.0977053	-0.0491939	0.375031	-0.073417	0.1354	0.379729	0.221498	0.443543	0.60272	0.278046	-0.138873	-0.456969	0.26559	-0.246315	-0.200922	-0.0647766	green	0.233494	protein_coding
THRB	111.252	33.1123	78.1398	-45.0275	0.430908	0.84318	0.583817	-0.0450359	0.11488	-0.347466	-0.104927	-0.34732	0.176248	-0.256818	-0.616815	-0.23715	-0.399956	0.0692352	-0.321455	-0.0437374	0.604033	0.151417	0.078286	black	-0.574492	protein_coding
EGR3	141.791	65.4968	76.2938	-10.797	0.722513	0.526623	0.584049	0.297936	0.392407	-0.00786441	-0.0498556	0.410347	0.517731	-0.0227319	0.0327156	0.446271	0.232624	-0.322513	-0.646335	0.189734	-0.146048	0.00659704	-0.134341	blue	-0.302127	protein_coding
HOXD8	159.757	37.1141	122.643	-85.5287	0.583796	0.054688	0.207895	0.293848	0.235035	0.480264	0.235993	0.617293	0.489416	0.27696	0.448191	0.728745	0.529052	-0.313549	-0.698452	0.105696	-0.565635	-0.337066	-0.0935423	green	0.0870388	protein_coding
TIPARP	64.9418	25.702	39.2398	-13.5378	0.535377	0.171967	0.0296433	0.228929	0.291417	0.29981	0.293822	0.146363	0.296467	-0.102999	0.295736	0.483214	0.587054	-0.443294	-0.415854	-0.0580876	-0.449483	-0.474147	-0.0723295	blue	0.0685053	protein_coding
SOD2	172.134	51.3295	120.805	-69.4752	0.601911	0.00567917	0.0887566	0.179349	0.295142	0.432589	0.139163	0.102213	0.37537	0.428367	0.634077	0.812966	0.747208	-0.461084	-0.597167	-0.05902	-0.5245	-0.367722	-0.285772	green	0.484976	protein_coding
CD163	35.6285	7.89996	27.7285	-19.8286	0.0776281	-0.276256	-0.432189	0.0385188	0.0978659	0.568688	0.623525	0.113259	0.147686	0.126619	0.416995	0.145821	0.380158	-0.258492	-0.0689973	-0.218419	-0.573416	-0.434496	0.0506296	pink	0.252372	protein_coding
ELK3	246.526	79.2072	167.318	-88.1111	0.673377	0.111501	0.234411	0.0682705	0.242676	0.350492	-0.00645176	0.326324	0.55006	0.305906	0.584658	0.897704	0.651372	-0.409451	-0.712258	0.0531251	-0.46024	-0.258468	-0.327804	green	0.365508	protein_coding
ASPN	80.5722	34.3401	46.2321	-11.8919	0.317121	0.664838	0.628566	-0.206937	0.00672539	-0.50372	-0.511088	-0.248461	0.208348	-0.100255	-0.417703	-0.0659611	-0.398425	0.110605	-0.229418	0.21705	0.670448	0.39742	-0.134824	brown	-0.371119	protein_coding
IFI6	15.1743	2.80589	12.3684	-9.56252	-0.182426	-0.0940845	-0.0890636	-0.515542	-0.420691	0.189579	-0.121706	-0.0847571	-0.115405	-0.0106532	0.140472	0.0552803	-0.275322	0.0967749	0.0622343	0.642333	0.200937	0.174727	-0.256289	cyan	0.0177433	protein_coding
PRRX1	318.601	54.9844	263.616	-208.632	0.773981	0.3145	0.508293	0.181907	0.362631	0.190514	-0.0963778	0.337302	0.720023	0.485568	0.328379	0.81297	0.499931	-0.355903	-0.825747	0.0977394	-0.289802	-0.0958222	-0.277489	green	0.177644	protein_coding
USP53	128.149	50.2217	77.9274	-27.7057	0.641481	0.232508	0.119029	0.130379	0.460586	0.394441	0.405519	0.364495	0.567615	0.0552892	0.257081	0.528458	0.537038	-0.570024	-0.526149	-0.0127627	-0.505783	-0.335929	-0.195249	blue	-0.0106322	protein_coding
ITM2C	163.805	9.28298	154.522	-145.239	-0.434243	0.267216	0.176539	-0.380964	-0.380188	-0.562618	-0.439106	-0.331773	-0.28167	-0.388682	-0.669409	-0.678193	-0.877599	0.526335	0.379915	0.120349	0.833045	0.541621	0.149836	lightgreen	-0.459293	protein_coding
RASSF2	87.5198	13.4711	74.0486	-60.5775	0.414328	-0.0422365	0.087817	0.215188	0.15156	0.378589	0.0221958	0.543466	0.754077	0.408873	0.561043	0.672354	0.404436	-0.139947	-0.555247	-0.109313	-0.540755	-0.288908	0.0665432	brown	0.271454	protein_coding
DLX5	50.5292	24.3348	26.1943	-1.85947	0.264844	-0.24962	0.0850725	0.050151	0.211198	0.316136	-0.00627472	0.444941	0.098656	0.294091	0.504953	0.680742	0.475499	-0.327038	-0.358387	0.170154	-0.454991	0.00512742	-0.413998	green	0.267742	protein_coding
PDP1	18.5485	1.33115	17.2173	-15.8862	0.196515	0.0305801	0.08571	0.00269702	-0.0274813	0.377181	0.0620541	0.537208	0.48329	0.0490674	0.202596	0.441485	0.126856	-0.126379	-0.377497	0.307424	-0.291095	-0.15372	0.0152195	grey	0.0308794	protein_coding
SCN3A	11.6767	3.20404	8.47265	-5.26861	-0.0114792	0.131621	0.00114725	-0.368236	-0.169047	-0.0198222	0.143724	-0.334333	-0.498648	-0.229701	-0.276442	-0.143125	-0.191139	0.090728	-0.0759776	-0.0523596	0.337161	0.086165	-0.280776	brown	-0.185502	protein_coding
RAC2	133.847	80.5804	53.2669	27.3135	0.0646801	-0.545111	-0.311296	0.102003	-0.0229475	0.559338	0.106064	0.232073	0.182294	0.580354	0.892934	0.653599	0.612598	-0.218895	-0.177079	-0.00376834	-0.649228	-0.322853	-0.142542	red	0.768291	protein_coding
CMTR2	309.223	139.856	169.367	-29.5104	0.820002	0.387785	0.510376	0.187673	0.378588	0.152093	0.0444667	0.244062	0.4069	0.284772	0.258559	0.681177	0.502767	-0.399154	-0.821708	0.038587	-0.254062	-0.0836168	-0.339498	turquoise	0.0873342	protein_coding
CES1	89.1195	36.3332	52.7864	-16.4532	-0.0674185	0.4079	0.37409	-0.428686	0.0842884	-0.587286	-0.238481	-0.401061	-0.322614	-0.318262	-0.674431	-0.513766	-0.589999	0.0273252	0.249958	0.173157	0.772781	0.700348	-0.395259	brown	-0.522643	protein_coding
CH25H	104.512	19.3132	85.1985	-65.8853	0.391223	-0.168635	0.0948178	0.389407	0.293489	0.449578	0.10585	0.621574	0.606549	0.627839	0.498265	0.743785	0.564372	-0.256129	-0.544371	-0.0280395	-0.628228	-0.288538	-0.0552508	brown	0.334231	protein_coding
DDIT4	26.6384	6.87527	19.7632	-12.8879	0.0194621	-0.30437	-0.431302	-0.157866	0.0194553	0.31205	0.351386	-0.11736	-0.191155	-0.0813988	0.377925	0.195729	0.43917	-0.277348	0.0519589	-0.139237	-0.363695	-0.359564	-0.22601	brown	0.312282	protein_coding
PAK3	137.098	32.1843	104.914	-72.7293	0.608283	0.83428	0.513399	0.0342525	0.141719	-0.0375801	0.122888	-0.0520089	0.449536	-0.153668	-0.441269	0.00623513	-0.195349	-0.0272917	-0.614609	-0.0711667	0.314251	-0.0787143	0.112545	black	-0.534033	protein_coding
GLRB	121.993	69.9797	52.0137	17.966	0.72988	0.698642	0.533686	-0.0849084	0.251572	-0.110966	-0.0269554	-0.0601947	0.247587	-0.167137	-0.103475	0.256967	0.117375	-0.331407	-0.55384	0.181499	0.185457	0.0153083	-0.303269	blue	-0.316582	protein_coding
HBD	27.0355	11.363	15.6725	-4.30956	-0.0609334	-0.302176	-0.447585	0.340734	-0.0260817	0.517415	0.552262	0.166062	0.043491	0.0296918	0.310543	0.0527641	0.342556	-0.119714	0.0211654	-0.0906402	-0.542236	-0.481251	0.2349	brown	0.20578	protein_coding
ANKRD6	116.54	34.9286	81.6115	-46.683	0.4554	0.841784	0.688994	-0.0707585	0.0686191	-0.426142	-0.282962	-0.175621	0.209411	-0.294572	-0.538925	-0.134357	-0.396368	0.064447	-0.381798	0.157783	0.603897	0.291078	-0.0123434	black	-0.577121	protein_coding
SCD	31.7354	5.08453	26.6509	-21.5664	0.104456	-0.274997	0.0188614	-0.0598988	-0.142506	0.237128	-0.174011	0.648121	0.125532	0.171246	0.490066	0.572274	0.231136	0.029481	-0.35783	0.152018	-0.336794	-0.0361767	-0.152104	greenyellow	0.190815	protein_coding
SLC25A43	327.965	48.0085	279.957	-231.948	0.755721	0.231051	0.201435	0.190089	0.229766	0.515589	0.330171	0.42168	0.538846	0.221017	0.481895	0.726042	0.568983	-0.348714	-0.84199	-0.0476033	-0.548119	-0.444914	-0.0747427	green	0.137243	protein_coding
FAM13A	54.3817	13.1268	41.2549	-28.1281	-0.048876	-0.434915	-0.625711	0.0951542	-0.0289308	0.704957	0.713517	-0.161604	-0.0830881	0.282503	0.423008	0.199612	0.541737	-0.174731	-0.0628388	-0.427665	-0.579315	-0.64985	0.0719664	pink	0.555632	protein_coding
CRHBP	32.1968	4.64634	27.5504	-22.9041	0.231158	-0.122975	0.183027	0.0494235	0.0372102	0.178922	-0.159647	0.60246	0.206398	0.191192	0.32973	0.590651	0.276106	-0.106109	-0.3972	0.173882	-0.263045	0.0172589	-0.202248	greenyellow	0.124275	protein_coding
MFAP2	42.9493	11.8254	31.1239	-19.2985	0.363007	0.513544	0.596799	-0.156576	0.237871	-0.475161	-0.494959	-0.322038	0.214422	0.0238261	-0.260423	0.152678	-0.0794434	-0.174146	-0.203072	0.106991	0.521821	0.477374	-0.406649	brown	-0.0835326	protein_coding
TMCC3	218.568	85.9476	132.62	-46.6725	0.551467	-0.0469159	0.111253	0.153948	0.247619	0.485816	0.0801707	0.5282	0.57037	0.248517	0.655531	0.916901	0.663549	-0.457123	-0.620979	0.142876	-0.637861	-0.297751	-0.252807	green	0.344	protein_coding
EDNRB	126.917	35.0687	91.8481	-56.7794	0.500401	0.0947849	0.199421	0.158144	0.144987	0.45192	0.0792817	0.471982	0.546011	0.243636	0.443238	0.743196	0.437769	-0.281992	-0.679356	0.169507	-0.471951	-0.218277	-0.11685	green	0.166336	protein_coding
RERGL	29.1856	11.0098	18.1758	-7.16598	0.336811	0.0126479	0.0424219	0.15072	0.0478945	0.385549	0.174839	0.171955	0.0771099	0.237932	0.292772	0.481695	0.377573	-0.159022	-0.470061	0.122148	-0.313139	-0.307687	-0.153556	turquoise	0.0904712	protein_coding
PLN	191.208	87.8816	103.327	-15.445	-0.00510766	0.654788	0.383254	-0.378257	-0.131353	-0.623953	-0.276723	-0.573677	-0.259884	-0.405548	-0.814254	-0.637569	-0.729661	0.348443	0.0905821	-0.0717059	0.902648	0.367299	0.0469603	brown	-0.620831	protein_coding
LRRN1	54.4653	18.8531	35.6123	-16.7592	0.431386	0.730859	0.493806	-0.00880958	0.0419693	-0.214821	-0.164082	-0.144959	0.31619	-0.300532	-0.353665	-0.0130928	-0.252188	-0.00822162	-0.360023	0.107971	0.396294	0.0943819	0.0602996	black	-0.417821	protein_coding
MAFB	85.0063	37.4724	47.5339	-10.0615	0.0287515	-0.561747	-0.314256	-0.0497459	0.0627542	0.349369	0.0704194	0.0418251	-0.123967	0.39729	0.756565	0.559611	0.638499	-0.309916	-0.0522612	0.00899678	-0.530085	-0.158891	-0.446492	red	0.696864	protein_coding
CSGALNACT2	214.74	106.192	108.547	-2.35498	0.776892	0.55079	0.295621	0.0296865	0.182005	0.226939	0.279669	0.136231	0.394647	-0.0942584	0.131957	0.375922	0.289694	-0.234922	-0.750123	-0.0883567	-0.197943	-0.37317	-0.0224666	blue	-0.191701	protein_coding
GMFG	212.578	83.6367	128.942	-45.3051	0.175717	-0.554975	-0.277376	0.589618	0.291665	0.591242	0.295872	0.420725	0.345436	0.676439	0.833979	0.682226	0.881169	-0.423149	-0.18542	-0.0863877	-0.918773	-0.46188	-0.0216104	brown	0.742931	protein_coding
PF4	20.3165	5.47218	14.8443	-9.37214	-0.207046	-0.0746308	-0.434327	-0.713357	-0.491007	0.326511	0.289073	-0.140644	-0.0961422	-0.457057	0.0158171	-0.12396	-0.271175	0.200516	0.0554266	-0.0738672	0.0962137	-0.220234	0.0360104	salmon	-0.0514469	protein_coding
PRKG1	32.1654	11.6961	20.4693	-8.77324	-0.145943	0.134719	-0.395959	-0.124802	-0.159975	0.353322	0.694205	-0.470171	-0.24748	-0.307188	-0.360213	-0.451284	-0.150759	0.0149749	0.16077	-0.335461	0.153376	-0.358331	0.219313	pink	-0.112892	protein_coding
COTL1	156.713	54.9447	101.768	-46.8237	0.331996	-0.313719	-0.101953	0.180818	0.146419	0.63575	0.220112	0.356005	0.325033	0.466187	0.814588	0.791117	0.675928	-0.42922	-0.43436	0.171382	-0.681378	-0.242368	-0.303795	red	0.561099	protein_coding
AKAP12	123.094	45.4749	77.6188	-32.144	0.66328	0.369877	0.295236	0.213859	0.302124	0.23924	0.174474	0.376397	0.633677	0.10511	0.0835265	0.521176	0.357564	-0.265001	-0.697089	-0.0433775	-0.296443	-0.358537	0.00365924	blue	-0.175976	protein_coding
GIMAP4	156.839	64.7463	92.0923	-27.3461	0.172211	-0.497058	-0.104911	0.15667	0.202777	0.379318	-0.073437	0.304689	0.253397	0.534062	0.780383	0.846822	0.772774	-0.446916	-0.218545	0.194331	-0.634154	-0.0958737	-0.451084	green	0.75035	protein_coding
MARCHF3	64.4181	22.7257	41.6924	-18.9666	0.543267	0.164394	0.296984	0.306538	0.44419	0.00332484	-0.102092	0.106713	0.485268	0.412162	0.233184	0.573091	0.537419	-0.311785	-0.503289	-0.288559	-0.293198	-0.178896	-0.145428	blue	0.27377	protein_coding
MMP1	24.9028	12.9706	11.9322	1.03834	0.000242435	-0.244909	-0.255653	-0.0272069	-0.190694	0.453544	0.0566037	0.118951	0.250108	0.101996	0.574766	0.364016	0.21371	0.0174755	-0.130959	0.0379017	-0.416441	-0.310314	0.14877	red	0.358947	protein_coding
PLEK	132.476	56.5939	75.8819	-19.288	0.0807248	-0.568918	-0.336054	0.188337	0.0907283	0.663237	0.300555	0.283053	0.261343	0.660326	0.813501	0.612492	0.665462	-0.307033	-0.175979	0.0396148	-0.751581	-0.34712	-0.135671	red	0.728815	protein_coding
RGL1	254.125	59.9527	194.172	-134.219	0.624583	-0.0496969	0.0497136	0.463505	0.485689	0.576804	0.368431	0.450086	0.70184	0.495358	0.605187	0.815177	0.841361	-0.585432	-0.578268	-0.0556295	-0.792788	-0.471563	-0.110232	green	0.394756	protein_coding
CPXM2	73.2072	39.0733	34.1339	4.93935	-0.101656	0.291308	0.414869	-0.445923	-0.112326	-0.620746	-0.699739	-0.41457	-0.115678	-0.0685543	-0.351675	-0.175152	-0.489475	0.177953	0.181421	0.273644	0.761569	0.642948	-0.323335	brown	-0.159665	protein_coding
CAVIN2	125.449	47.3898	78.0591	-30.6693	0.534268	0.0935947	0.205049	0.0522481	0.237018	0.403927	0.0130442	0.413334	0.692304	0.307512	0.473579	0.789113	0.457034	-0.400319	-0.567382	0.340396	-0.429578	-0.164775	-0.287132	green	0.153848	protein_coding
FERMT3	146.186	81.795	64.3908	17.4041	0.0931139	-0.553691	-0.324374	0.0912865	0.0580193	0.588095	0.175838	0.212663	0.151375	0.542366	0.891072	0.675969	0.680762	-0.347215	-0.153809	0.0387898	-0.677668	-0.273453	-0.291033	red	0.783049	protein_coding
MICB	118.009	37.8317	80.177	-42.3454	0.370497	-0.166125	-0.132191	-0.0464236	-0.0885338	0.664936	0.256857	0.346872	0.406358	0.269032	0.65403	0.765422	0.537728	-0.184717	-0.593708	0.0208895	-0.552581	-0.462419	-0.0985963	green	0.426233	protein_coding
CCDC178	81.9374	6.54171	75.3957	-68.8539	0.486329	0.084013	0.320746	0.431112	0.358353	0.297834	0.142652	0.373343	0.591654	0.711368	0.21602	0.546984	0.443885	-0.249422	-0.586579	-0.0150911	-0.375329	-0.124642	-0.045707	purple	0.247433	protein_coding
NTM	107.15	20.9997	86.15	-65.1502	0.493138	0.113444	0.320754	0.414579	0.307798	0.277423	-0.0381032	0.516466	0.82523	0.51328	0.330511	0.643981	0.395104	-0.229784	-0.568347	0.111434	-0.435114	-0.192663	0.0603898	blue	0.14934	protein_coding
DKK2	31.308	11.4623	19.8458	-8.3835	0.235153	-0.161294	0.0822767	0.0913371	-0.00251331	0.304187	0.0298833	0.558321	0.218133	0.1682	0.35945	0.551582	0.329596	-0.145793	-0.417589	0.243054	-0.363551	-0.0717532	-0.199672	green	0.154029	protein_coding
BTC	149.07	47.0235	102.047	-55.023	0.299642	0.850293	0.606488	-0.171536	0.0647932	-0.62054	-0.231384	-0.32482	-0.106241	-0.507656	-0.768992	-0.487575	-0.593945	0.15368	-0.124358	0.0648605	0.768923	0.35609	0.0282482	brown	-0.802525	protein_coding
KCNMA1	173.482	72.5652	100.917	-28.3519	-0.0974703	0.573454	0.420104	-0.284053	-0.0491991	-0.748501	-0.416381	-0.475768	-0.383866	-0.48525	-0.785661	-0.678935	-0.741411	0.276542	0.24982	0.0700047	0.891342	0.565393	-0.0498935	brown	-0.665603	protein_coding
FLNC	170.631	44.8684	125.763	-80.8943	-0.434611	0.243976	0.0250027	-0.287499	-0.227838	-0.572567	-0.249134	-0.42772	-0.46344	-0.598982	-0.708946	-0.793238	-0.704936	0.301054	0.562476	0.0942765	0.740854	0.42162	0.0826103	green	-0.524127	protein_coding
GOLM1	166.828	70.1377	96.6901	-26.5524	0.401388	-0.218954	0.0731551	0.208612	0.254379	0.361209	-0.10406	0.501514	0.710031	0.587644	0.702395	0.881581	0.63405	-0.30422	-0.503401	0.0200494	-0.631783	-0.245345	-0.16887	green	0.491043	protein_coding
PRIMA1	35.6507	6.65582	28.9948	-22.339	0.302519	0.000237595	-0.0110589	0.280013	0.265695	0.395759	0.353535	0.764445	0.547131	-0.102048	0.185557	0.351942	0.315496	-0.32576	-0.287131	0.0800001	-0.552862	-0.306909	0.115731	greenyellow	-0.155949	protein_coding
EMCN	121.54	59.2364	62.304	-3.06754	0.387659	-0.231865	0.0954781	0.297098	0.300913	0.385328	0.0343119	0.571088	0.474146	0.471448	0.554011	0.850076	0.704452	-0.434399	-0.447039	0.0839445	-0.589914	-0.184224	-0.283609	green	0.466112	protein_coding
ITM2A	66.609	9.0051	57.6039	-48.5988	0.487459	0.307692	0.287808	0.0420148	0.151495	0.208949	-0.0526674	0.458486	0.876438	0.0248311	0.155669	0.539389	0.159525	-0.179731	-0.524514	0.172546	-0.233709	-0.18129	0.0684728	grey60	-0.0957797	protein_coding
ANGPTL1	46.4428	23.1961	23.2467	-0.0505636	0.0284383	0.472444	0.287674	-0.18034	0.112166	-0.396625	-0.0439428	0.0995985	0.0227169	-0.55072	-0.693743	-0.472444	-0.574429	0.143323	0.0561881	-0.0474169	0.44082	0.267956	0.109599	red	-0.816457	protein_coding
CNTN1	77.3108	16.8752	60.4356	-43.5604	0.216049	0.73455	0.564855	-0.0124503	0.105502	-0.507425	-0.236293	-0.192295	0.0535427	-0.412068	-0.695059	-0.369522	-0.521296	0.108722	-0.123196	0.00601182	0.629959	0.387995	0.0651156	black	-0.623991	protein_coding
ATP2B1	237.178	61.8916	175.286	-113.395	0.573318	0.00463411	0.0619088	0.108774	0.0931788	0.613773	0.226922	0.503112	0.520729	0.316373	0.638305	0.81321	0.558197	-0.258887	-0.752196	0.0587938	-0.633157	-0.473805	-0.0664735	green	0.270277	protein_coding
GXYLT2	47.7719	21.8495	25.9225	-4.07303	0.525912	0.489974	0.615349	0.115271	0.423532	-0.282643	-0.310331	-0.148021	0.465211	0.42292	-0.0980458	0.244699	0.0943028	-0.264369	-0.357074	0.0656264	0.240012	0.297487	-0.281517	blue	-0.0176845	protein_coding
ERRFI1	27.1046	7.13858	19.966	-12.8274	-0.167596	-0.0244338	-0.346845	-0.162517	-0.0602172	0.0130202	0.346455	-0.144783	-0.410579	-0.549442	-0.175544	-0.384812	-0.0745352	-0.0201793	0.278179	-0.189706	0.00106159	-0.191333	0.0671006	green	-0.237472	protein_coding
LIFR	61.0461	21.0716	39.9745	-18.903	0.397837	-0.111796	0.0921476	0.0464172	0.355285	0.327986	0.150474	0.0133443	0.11952	0.479943	0.380833	0.657524	0.642473	-0.586263	-0.329805	0.245589	-0.31628	-0.0231376	-0.662982	green	0.426074	protein_coding
CHODL	55.4564	18.7203	36.7361	-18.0158	0.474469	0.457116	0.316056	0.0957194	0.0150878	0.153445	-0.0405114	0.133829	0.624039	-0.0211049	0.0577842	0.332678	0.0246043	-0.0231654	-0.537297	0.0835745	-0.0460293	-0.218569	0.201883	blue	-0.165373	protein_coding
PRDX6	13.3121	7.19479	6.11736	1.07743	0.0279153	0.0139275	-0.17634	-0.0745362	-0.0479477	0.450364	0.629582	-0.0364202	-0.208069	0.0290867	-0.0814837	-0.166981	-0.0508475	-0.115004	-0.0996557	0.174	-0.111555	-0.154331	-0.0559825	pink	-0.187095	protein_coding
PDLIM7	137.372	51.3645	86.0074	-34.6429	-0.15281	0.474475	0.290539	-0.378216	-0.152789	-0.454207	-0.111043	-0.43879	-0.304405	-0.368391	-0.775461	-0.674451	-0.776187	0.2838	0.195281	0.138965	0.827574	0.512305	-0.0505586	brown	-0.625516	protein_coding
LIPG	29.3813	8.40085	20.9805	-12.5796	-0.0169385	-0.451635	-0.261221	-0.0599844	0.0106876	0.27851	0.0990596	0.0907689	-0.276944	0.140509	0.523862	0.412321	0.450161	-0.20284	-0.044483	0.0170997	-0.427651	-0.137555	-0.324369	green	0.411868	protein_coding
MYO5A	208.587	69.924	138.663	-68.7388	0.37191	-0.341063	-0.164125	0.29855	0.163867	0.655559	0.296762	0.346704	0.332263	0.587275	0.848636	0.776056	0.761894	-0.32477	-0.511251	-0.109502	-0.807854	-0.451912	-0.118686	red	0.628417	protein_coding
TGFBR3	68.5583	3.68956	64.8687	-61.1792	0.371222	-0.16109	-0.0964928	0.225927	0.393647	0.345969	0.319134	0.354673	0.39484	0.160324	0.376866	0.577485	0.706433	-0.489713	-0.322814	-0.24831	-0.594112	-0.355961	-0.187113	lightgreen	0.323501	protein_coding
CFH	68.861	2.88447	65.9766	-63.0921	0.125856	-0.483632	-0.290216	0.172166	0.226712	0.477877	0.302385	0.288099	0.154118	0.491366	0.642002	0.514728	0.678647	-0.430943	-0.0671411	0.105569	-0.682133	-0.330035	-0.245324	lightgreen	0.514951	protein_coding
ADM	16.7409	2.95729	13.7836	-10.8263	-0.0434089	-0.383967	-0.18015	0.371559	0.254381	0.0150873	0.136046	-0.110061	-0.241943	0.439067	0.260075	0.0728306	0.463038	-0.204279	0.178601	-0.12138	-0.354798	-0.182098	-0.110059	grey	0.388701	protein_coding
ALDH1B1	132.302	67.3285	64.9733	2.3552	-0.0249777	0.566895	0.562026	-0.340987	-0.152095	-0.696926	-0.603039	-0.30503	-0.117595	-0.271708	-0.644103	-0.435319	-0.755837	0.350892	0.0440128	0.31169	0.867844	0.640942	-0.0779981	brown	-0.590181	protein_coding
NAP1L3	135.18	35.3568	99.8231	-64.4663	0.535351	0.85552	0.754358	-0.0356233	0.354057	-0.481513	-0.172287	-0.297631	0.0416695	-0.191295	-0.65198	-0.150366	-0.264106	-0.214498	-0.284442	0.185317	0.665265	0.42111	-0.336435	black	-0.594439	protein_coding
HES1	10.8264	2.6868	8.13958	-5.45278	0.174508	-0.0419234	0.131683	0.197712	0.267834	-0.0566795	0.13254	-0.0983276	-0.297763	0.251759	0.0168262	0.0383227	0.291394	-0.360986	0.0409515	0.279048	-0.0128365	0.127893	-0.439481	grey	0.062248	protein_coding
DLK1	31.221	11.7496	19.4714	-7.72182	0.0305977	-0.307132	-0.089089	0.400864	0.292377	0.264488	0.184615	0.835353	0.2896	0.130384	0.298907	0.261263	0.333923	-0.332988	0.0272721	0.210377	-0.581482	-0.0880163	-0.000517565	greenyellow	0.0190124	protein_coding
MS4A14	93.9016	42.9272	50.9743	-8.0471	-0.118917	-0.531478	-0.534248	0.120635	-0.111758	0.595272	0.24687	0.349986	0.220633	0.0868601	0.760848	0.408714	0.467561	-0.15122	0.0275107	-0.0652404	-0.724499	-0.474817	0.172423	red	0.524325	protein_coding
TCEAL7	109.008	37.3377	71.6704	-34.3327	0.566616	0.770823	0.569026	0.108188	0.0789785	-0.212635	-0.140898	0.146179	0.372197	-0.335662	-0.334078	0.0606097	-0.198591	0.0758653	-0.561323	-0.0166012	0.266223	-0.0274285	0.178971	blue	-0.580181	protein_coding
SOX8	16.1428	1.46918	14.6736	-13.2044	0.296742	0.284547	0.30413	0.0429727	-0.0246859	-0.0979257	-0.236044	0.344651	0.383499	-0.294938	-0.0133843	0.285596	0.0116049	-0.00115793	-0.34155	0.0879411	0.0304995	0.0117316	0.0567559	grey	-0.180724	protein_coding
SKAP2	75.4727	19.5813	55.8914	-36.3101	0.505793	-0.0445771	0.241034	0.458679	0.343447	0.182399	-0.00972389	0.388087	0.361428	0.392182	0.516095	0.653585	0.640001	-0.379605	-0.445872	0.13062	-0.525637	-0.231928	-0.137699	green	0.280857	protein_coding
RETREG1	101.204	24.1854	77.0181	-52.8328	0.385763	-0.197825	-0.0683909	0.180193	0.313707	0.421173	0.197389	0.560519	0.666012	0.372165	0.586021	0.665499	0.593657	-0.348063	-0.408647	-0.0812529	-0.730798	-0.38868	-0.0556554	green	0.300795	protein_coding
TCEAL2	133.397	61.3834	72.0134	-10.63	0.0982858	0.706661	0.440534	-0.2411	0.00470157	-0.580443	-0.266948	-0.539308	-0.123759	-0.43938	-0.75473	-0.502337	-0.597993	0.185111	0.0542784	-0.108541	0.836727	0.357653	0.0299351	brown	-0.581226	protein_coding
MZB1	40.5139	17.8471	22.6668	-4.81969	0.0623708	-0.386774	0.0588513	0.466784	0.42901	0.16984	0.0455101	0.149343	0.0510567	0.898129	0.370902	0.326759	0.5093	-0.41984	0.0512458	0.246004	-0.364916	0.160852	-0.38544	purple	0.481197	protein_coding
ITGAV	65.4334	21.2243	44.2091	-22.9848	0.275234	-0.0153695	-0.327796	0.174656	0.0217368	0.823611	0.800367	0.213446	0.332236	0.00294731	0.266701	0.31409	0.412218	-0.274159	-0.372799	-0.219089	-0.53858	-0.661751	0.195996	pink	0.178257	protein_coding
ZNF267	254.754	8.22962	246.525	-238.295	0.58446	-0.129425	0.0476819	0.366888	0.329479	0.557591	0.265035	0.355767	0.407407	0.481062	0.717519	0.865897	0.859745	-0.507156	-0.621765	0.0266983	-0.750534	-0.421306	-0.232727	lightgreen	0.530547	protein_coding
PIK3AP1	177.612	108.866	68.7463	40.1193	0.0259208	-0.603594	-0.379895	0.163809	-0.0672431	0.521748	0.0687617	0.230486	0.0975474	0.44319	0.951453	0.661601	0.685169	-0.176723	-0.158757	-0.0713938	-0.719848	-0.372319	-0.0869714	red	0.808709	protein_coding
EGR1	13.5628	2.99666	10.5661	-7.56944	0.18385	0.121381	0.188594	0.051679	0.0472943	0.0657345	-0.176022	0.303497	0.275397	-0.182643	0.166802	0.311517	0.0346112	-0.139618	-0.185847	0.360408	-0.119815	0.0898407	-0.127397	grey	-0.139594	protein_coding
WFDC1	33.5568	16.1698	17.387	-1.21729	-0.189301	0.180575	0.230272	-0.297831	-0.260291	-0.35889	-0.324272	-0.189621	-0.522491	-0.202359	-0.364044	-0.359665	-0.514318	0.20932	0.197184	0.498335	0.620441	0.47812	-0.257138	brown	-0.39163	protein_coding
GLUL	18.5482	5.01322	13.535	-8.52182	-0.0742988	-0.274782	-0.290599	-0.170976	0.0276474	0.18927	0.117535	0.199001	-0.0324388	-0.185264	0.321955	0.1424	0.199	-0.201065	0.132446	0.173706	-0.35709	-0.148569	-0.13099	brown	0.0564594	protein_coding
IFIT1	94.4763	34.1429	60.3334	-26.1906	0.40933	0.00267734	0.206857	0.21431	0.0538262	0.350208	-0.100307	0.214327	0.508152	0.549621	0.517083	0.708639	0.406144	-0.117676	-0.575893	0.077615	-0.334784	-0.184836	-0.0608198	green	0.410594	protein_coding
CETN3	338.334	171.003	167.331	3.67139	0.893282	0.419598	0.437537	0.529482	0.625704	0.33282	0.393681	0.333212	0.570698	0.38734	0.178653	0.591507	0.636224	-0.609893	-0.741135	-0.0169637	-0.440694	-0.327556	-0.169943	blue	-0.00664517	protein_coding
MCAM	175.28	96.5079	78.7718	17.7361	-0.0781934	0.581618	0.359987	-0.549773	-0.247963	-0.621268	-0.389583	-0.492993	-0.288098	-0.468113	-0.730917	-0.585512	-0.791922	0.373171	0.123066	0.083482	0.948036	0.482509	-0.0618593	brown	-0.602224	protein_coding
SYTL2	153.841	41.4102	112.431	-71.0211	0.617612	0.164933	0.346575	0.163792	0.275486	0.341752	-0.0118139	0.334666	0.560378	0.510995	0.435393	0.766184	0.449735	-0.366607	-0.658041	0.280624	-0.327275	-0.108457	-0.323804	green	0.159279	protein_coding
RPS6	50.7644	17.9696	32.7948	-14.8252	0.188477	-0.10134	-0.295745	0.330384	0.325273	0.535926	0.785651	0.337917	0.162936	-0.0172082	0.0711922	0.0892052	0.420629	-0.384937	-0.128833	-0.331376	-0.567208	-0.496724	0.123323	pink	-0.0135366	protein_coding
SLIT2	73.3583	8.8455	64.5128	-55.6673	0.533335	0.407468	0.369058	0.223826	0.263039	0.133849	-0.0313641	0.292235	0.864539	0.205387	0.0168229	0.448949	0.176791	-0.14694	-0.546707	-0.0742152	-0.141472	-0.203008	0.150998	grey60	-0.0641549	protein_coding
PCDH7	143.743	76.4034	67.3396	9.06376	0.0170808	0.614314	0.468293	-0.390312	-0.0848152	-0.569176	-0.305483	-0.460458	-0.316636	-0.331585	-0.727303	-0.533936	-0.728367	0.224973	0.0622909	0.1314	0.908208	0.57281	-0.194369	brown	-0.627262	protein_coding
CKMT2	101.916	35.3235	66.5926	-31.2691	-0.224319	0.306327	0.250183	-0.128014	-0.0648303	-0.65284	-0.328946	-0.556281	-0.434911	-0.123576	-0.668995	-0.647609	-0.57188	0.307266	0.342164	0.0350578	0.748921	0.420425	-0.0120492	brown	-0.41119	protein_coding
MS4A4A	151.584	57.2808	94.3028	-37.022	0.10309	-0.540611	-0.346045	0.309733	0.0787292	0.646135	0.284124	0.270156	0.243562	0.62625	0.83186	0.631378	0.732345	-0.240578	-0.261937	-0.0676141	-0.830109	-0.454166	-0.0223632	red	0.741419	protein_coding
NDRG3	98.9315	44.8599	54.0716	-9.2117	0.178999	0.656228	0.650843	-0.428525	-0.00166521	-0.620693	-0.521148	-0.135134	0.0245656	-0.392617	-0.574842	-0.25359	-0.637184	0.0729526	-0.0480556	0.491774	0.785957	0.684766	-0.296644	brown	-0.659486	protein_coding
OLR1	100.292	42.746	57.546	-14.8	0.234635	-0.267874	-0.0848458	0.0925123	-0.0751599	0.477725	-0.032656	0.406732	0.304034	0.287583	0.772237	0.712284	0.466454	-0.113859	-0.401195	0.132918	-0.585229	-0.355326	-0.0128616	red	0.455011	protein_coding
TAF13	237.922	143.272	94.6492	48.6232	0.845973	0.755343	0.540513	0.110324	0.362712	-0.00125401	0.0915703	0.0983423	0.445228	-0.135402	-0.095079	0.334862	0.209399	-0.359237	-0.673804	-0.00221237	0.0516642	-0.144248	-0.151504	blue	-0.339123	protein_coding
TMEM178A	87.8928	20.6221	67.2707	-46.6486	0.581648	0.758934	0.695881	0.167352	0.362564	-0.312278	-0.139449	0.182279	0.465269	-0.261632	-0.420994	0.0643989	-0.136958	-0.211101	-0.430666	0.0707254	0.295904	0.24974	-0.0483656	black	-0.526781	protein_coding
GBP1	244.627	36.1809	208.447	-172.266	0.749368	0.393705	0.392959	0.163068	0.270936	0.299418	0.0776932	0.287667	0.518553	0.13771	0.271536	0.710584	0.437667	-0.3471	-0.779539	0.0655434	-0.27924	-0.228902	-0.20096	green	0.0329127	protein_coding
NOX4	63.5642	32.2443	31.32	0.924292	0.604414	0.672001	0.588674	0.245741	0.517839	-0.31618	-0.037562	-0.204515	0.442972	0.161723	-0.339362	0.0100546	0.0820359	-0.335733	-0.304483	-0.08182	0.25476	0.120018	-0.115968	blue	-0.21711	protein_coding
NDNF	93.118	8.83606	84.282	-75.4459	0.570232	0.370668	0.393371	0.120108	0.241401	0.138235	-0.117202	0.410587	0.880765	0.177636	0.145382	0.560779	0.193633	-0.177337	-0.596196	0.0630382	-0.18173	-0.132235	0.0209234	grey60	-0.0833498	protein_coding
PTPRC	140.329	68.5732	71.7559	-3.18265	0.299719	-0.314421	-0.20549	0.202394	0.0677164	0.573458	0.225869	0.268164	0.282644	0.442216	0.847723	0.664012	0.683025	-0.323239	-0.342693	-0.00536959	-0.691127	-0.43841	-0.0979945	red	0.622917	protein_coding
CXCL12	89.3645	38.7105	50.654	-11.9435	0.178011	-0.417717	0.0461633	0.215134	0.279193	0.133771	-0.263342	0.373338	0.26589	0.532836	0.66687	0.75633	0.697083	-0.463356	-0.0889527	0.288539	-0.475571	0.0535604	-0.475636	green	0.646671	protein_coding
SCARA5	76.4654	13.114	63.3514	-50.2373	0.532262	0.196066	0.186527	0.174878	0.403298	0.242096	0.116539	0.372749	0.934929	0.265931	0.227764	0.553808	0.422363	-0.381193	-0.473573	-0.122264	-0.391549	-0.245947	0.000991507	grey60	0.121269	protein_coding
LIMCH1	16.6019	5.37404	11.2278	-5.85378	-0.104181	0.101641	-0.244354	-0.168164	-0.159453	0.265934	0.528674	-0.430113	-0.259193	-0.123816	-0.361474	-0.305421	-0.12452	0.0297666	0.0700057	-0.196654	0.242089	-0.208511	0.0234729	pink	-0.0623074	protein_coding
RFLNB	45.7998	22.0194	23.7805	-1.76111	0.530962	0.522427	0.535591	-0.0654738	0.315962	-0.287339	-0.294553	0.0919427	0.436381	-0.1088	-0.0838653	0.266311	0.0523544	-0.238215	-0.40888	-0.0380346	0.17401	0.271213	-0.246839	blue	-0.158385	protein_coding
C4orf48	134.548	58.1747	76.373	-18.1983	-0.0246402	-0.625449	-0.309343	0.253561	-0.046242	0.543646	0.023638	0.438438	0.282491	0.58868	0.847541	0.69756	0.586341	-0.119474	-0.154496	0.0576882	-0.712535	-0.311116	-0.0587049	red	0.709509	protein_coding
KCNE4	16.1424	3.31884	12.8236	-9.50474	-0.198364	-0.21664	0.131912	-0.242399	-0.0926219	-0.369641	-0.512984	-0.145893	-0.3903	0.110306	0.0290549	0.0786328	-0.0635004	0.0537519	0.202698	0.399919	0.254591	0.417155	-0.434481	pink	0.108089	protein_coding
IL32	50.1182	19.9243	30.194	-10.2697	-0.0199775	-0.355369	-0.0813809	-0.147261	-0.178691	0.163947	-0.402927	-0.0454561	0.161174	0.331714	0.669325	0.622191	0.328416	-0.10264	-0.0551178	0.34536	-0.203029	0.0461329	-0.352428	red	0.624056	protein_coding
AGTPBP1	61.525	27.6451	33.88	-6.23492	0.113817	-0.157187	-0.471285	0.0784146	-0.0697352	0.845052	0.862838	0.191437	0.162521	0.0715471	0.299562	0.148155	0.32939	-0.183504	-0.22687	-0.204623	-0.55285	-0.672023	0.246272	pink	0.202263	protein_coding
CTSH	100.773	25.5805	75.1922	-49.6117	0.0972289	-0.453708	-0.0965175	0.298598	0.11722	0.257831	-0.210491	0.522367	0.503569	0.57833	0.749262	0.678872	0.548362	-0.106323	-0.231259	-0.0270782	-0.664669	-0.220083	0.0214051	brown	0.571667	protein_coding
RBMS1	90.3679	16.015	74.353	-58.338	0.594891	0.178103	0.184786	0.321945	0.491941	0.275166	0.200223	0.0412391	0.416339	0.268614	0.301501	0.60353	0.678438	-0.587923	-0.455343	-0.0499109	-0.390971	-0.23927	-0.317919	yellow	0.259839	protein_coding
CPM	72.8218	31.6869	41.1349	-9.44806	-0.00859026	-0.48306	-0.48893	-0.121423	-0.116317	0.50404	0.24968	0.202492	0.0945842	0.0991993	0.724992	0.453502	0.499747	-0.151737	-0.109977	-0.120046	-0.640496	-0.424988	-0.0855979	red	0.519046	protein_coding
LYN	123.903	56.3649	67.5383	-11.1734	0.307895	-0.34607	-0.142487	0.141517	0.183708	0.517494	0.207787	0.323509	0.25691	0.480753	0.808669	0.680677	0.691916	-0.435589	-0.297034	0.0606368	-0.664946	-0.278373	-0.275327	red	0.599988	protein_coding
BCL6	44.7699	7.54308	37.2269	-29.6838	-0.268743	-0.382479	-0.618576	-0.0904207	-0.0423289	0.43951	0.621919	-0.0743663	-0.276391	-0.225368	0.0789593	-0.129202	0.221017	-0.170487	0.278579	-0.22046	-0.333108	-0.361962	0.0141721	brown	0.15303	protein_coding
HPR	34.5174	10.2365	24.2809	-14.0444	0.0320138	-0.440261	-0.0388285	0.388877	0.434533	0.183569	0.117189	0.0207225	-0.043045	0.799059	0.326266	0.342494	0.58725	-0.42684	0.0593494	0.107835	-0.39466	0.0839431	-0.41107	purple	0.532476	protein_coding
COLEC12	95.5767	31.3305	64.2462	-32.9157	0.284836	-0.229535	0.0951012	0.359691	0.210228	0.389174	-0.065409	0.36131	0.562569	0.727599	0.633632	0.69959	0.521593	-0.228657	-0.39053	0.163261	-0.569183	-0.159717	-0.0649002	green	0.489782	protein_coding
ARMT1	380.283	193.971	186.312	7.65974	0.91382	0.570584	0.522022	0.114311	0.391618	0.139825	0.129088	0.192841	0.481687	0.141527	0.153704	0.574305	0.415215	-0.431077	-0.82518	0.0199478	-0.161192	-0.172511	-0.283614	blue	-0.0929654	protein_coding
ITGA10	46.7233	15.1723	31.5511	-16.3788	0.119324	0.520025	0.184732	-0.172868	0.0883915	-0.269865	0.23009	-0.422317	-0.287734	-0.586385	-0.63948	-0.484321	-0.307774	-0.0957832	0.0784016	-0.105224	0.507025	0.193271	-0.109378	red	-0.50138	protein_coding
MAL	32.0549	11.5234	20.5315	-9.00812	0.352983	0.14956	0.31899	0.221483	0.259793	0.021936	-0.0733873	0.846756	0.649086	0.0849872	0.0331104	0.325133	0.102526	-0.110724	-0.377537	0.163403	-0.292043	-0.0647947	0.111479	greenyellow	-0.291895	protein_coding
NT5C2	25.8454	7.8347	18.0107	-10.176	-0.0661714	0.0730424	-0.324168	-0.150799	-0.256033	0.453399	0.643124	0.214571	0.121433	-0.308478	-0.182727	-0.29356	-0.270311	0.262347	-0.171445	-0.300816	-0.174023	-0.465675	0.536628	pink	-0.32808	protein_coding
RSPO3	74.1277	4.08438	70.0433	-65.9589	0.511491	0.0565565	0.242511	0.445991	0.47325	0.0876034	-0.0187789	0.399723	0.743809	0.444752	0.317425	0.594596	0.598879	-0.375984	-0.44173	-0.203332	-0.474462	-0.227175	0.012056	grey60	0.301688	protein_coding
RNF19A	63.4461	29.0904	34.3557	-5.26528	0.335653	0.12714	-0.203641	0.292583	0.265532	0.684274	0.871341	0.163495	0.377292	0.0386473	0.0452312	0.124104	0.342488	-0.380777	-0.298657	-0.258196	-0.460653	-0.554883	0.205702	pink	-0.0371975	protein_coding
NR1D1	36.0343	5.86058	30.1738	-24.3132	0.43141	-0.0130542	0.132476	0.0593406	0.274923	0.279079	0.185597	0.20219	0.295203	0.286563	0.309666	0.56092	0.535271	-0.494757	-0.349558	0.255107	-0.320299	-0.103671	-0.438057	yellow	0.25203	protein_coding
DUSP2	9.30626	1.83432	7.47194	-5.63762	0.225572	0.0960413	0.207304	0.376799	0.163398	-0.201582	-0.153437	0.27506	0.292715	-0.0344036	0.0830976	0.114631	0.177449	-0.0653507	-0.0850582	0.0240666	-0.164079	-0.102165	0.184891	grey	-0.0565272	protein_coding
CSPG4	137.976	64.5633	73.4122	-8.84897	-0.188013	0.461341	0.177701	-0.489031	-0.225413	-0.501899	-0.231928	-0.537466	-0.453813	-0.693405	-0.688136	-0.601776	-0.696745	0.204324	0.305086	0.131524	0.856756	0.467327	-0.154075	brown	-0.589865	protein_coding
PLA2G4A	249.592	43.5747	206.017	-162.442	0.725587	0.311631	0.394961	0.0193702	0.200549	0.290079	0.000493036	0.390679	0.599598	0.208187	0.338338	0.773989	0.41476	-0.339249	-0.803634	0.214075	-0.26989	-0.147247	-0.311521	green	0.0673367	protein_coding
CRY1	93.9781	49.5266	44.4515	5.07506	0.622237	0.739922	0.338075	0.0130259	0.241553	0.0810873	0.288476	0.137945	0.436858	-0.445634	-0.303709	0.067651	-0.0400029	-0.235092	-0.473422	-0.0932113	0.0939854	-0.217393	0.091493	blue	-0.558714	protein_coding
GBP3	101.985	46.1862	55.7984	-9.61215	0.666711	0.358855	0.268082	0.500062	0.373319	0.281825	0.249006	0.0380688	0.442617	0.321098	0.236438	0.432689	0.510508	-0.345671	-0.590657	-0.0911104	-0.358116	-0.401181	0.0703932	blue	0.0838344	protein_coding
FOLR2	149.03	72.9358	76.0939	-3.15806	0.0167104	-0.603132	-0.346546	0.376938	0.0542925	0.525623	0.155517	0.318051	0.195192	0.59918	0.873604	0.555933	0.67891	-0.228439	-0.09045	0.076837	-0.79159	-0.361987	-0.0248529	red	0.685071	protein_coding
EOGT	104.661	32.3188	72.3417	-40.0229	0.564415	0.840297	0.519096	-0.104745	0.238006	-0.292142	0.0806859	-0.266349	0.100839	-0.264431	-0.562346	-0.193204	-0.235645	-0.0779011	-0.396553	-0.209078	0.499742	0.0642682	-0.0717442	black	-0.561103	protein_coding
COL1A1	43.7032	17.3097	26.3936	-9.08391	-0.102838	-0.478732	-0.173688	-0.122356	-0.171707	0.317766	-0.171004	-0.14789	0.00489353	0.569222	0.634101	0.531442	0.311861	-0.0135136	-0.101286	0.157198	-0.247635	0.0655286	-0.347382	red	0.68753	protein_coding
SERPINI1	140.815	53.3995	87.415	-34.0155	0.650939	0.631079	0.659519	0.0322692	0.231134	-0.0727782	-0.115215	0.0329575	0.393242	0.21088	-0.175963	0.298108	-0.016326	-0.16361	-0.617626	0.271264	0.24802	0.140627	-0.228924	blue	-0.300153	protein_coding
CD27	36.0919	16.6443	19.4476	-2.80325	0.247275	-0.14942	0.230014	0.312283	0.320412	0.131898	-0.0602878	0.108787	0.199016	0.893309	0.341354	0.405129	0.389818	-0.254081	-0.263238	0.154523	-0.23136	0.137655	-0.327022	purple	0.396618	protein_coding
SIGLEC1	115.345	42.3639	72.9813	-30.6174	0.12885	-0.49314	-0.33314	0.0823607	-0.00726955	0.716643	0.319495	0.152441	0.312263	0.71202	0.771487	0.669843	0.616627	-0.201256	-0.337846	-0.0414366	-0.675916	-0.392954	-0.145014	red	0.721925	protein_coding
RDH10	95.4546	7.6243	87.8303	-80.206	0.607769	0.375328	0.275921	0.161467	0.324503	0.146443	0.0709274	0.34354	0.851177	0.151142	0.0832268	0.478213	0.296636	-0.211704	-0.628272	-0.188618	-0.280883	-0.309651	0.0942475	grey60	-0.0810634	protein_coding
TTLL7	176.853	62.9123	113.941	-51.0287	0.183996	0.792076	0.453003	-0.198236	0.0474188	-0.490636	-0.0625631	-0.461259	-0.0971274	-0.415835	-0.852776	-0.58347	-0.622317	0.158925	-0.0301224	-0.0930674	0.803085	0.262939	0.0879901	brown	-0.714286	protein_coding
CARD6	151.329	51.8257	99.5032	-47.6775	0.487566	-0.133077	-0.0238588	0.106201	0.350018	0.432869	0.152699	0.206669	0.516229	0.427094	0.639464	0.814373	0.771854	-0.534663	-0.450778	-0.130199	-0.582228	-0.317413	-0.339009	green	0.559084	protein_coding
PCDHB7	90.5614	50.6979	39.8635	10.8344	0.685961	0.595421	0.583049	0.162021	0.465289	-0.121296	-0.0879008	-0.122716	0.454593	0.281749	-0.131099	0.334162	0.223848	-0.36697	-0.498345	-0.0161878	0.157079	0.0718902	-0.281309	blue	-0.0895173	protein_coding
ABCG1	124.113	65.8944	58.2189	7.67552	-0.0197104	-0.573703	-0.335654	0.088866	-0.13814	0.451144	-0.0546825	0.316145	0.151104	0.390407	0.872698	0.677009	0.569531	-0.0684981	-0.216258	-0.0179723	-0.659933	-0.324242	-0.0649481	red	0.700478	protein_coding
PCDHB10	201.064	29.056	172.008	-142.952	0.74282	0.803748	0.721198	0.035438	0.304426	-0.23094	-0.109996	-0.128638	0.299269	0.0560451	-0.314946	0.185314	-0.00972624	-0.147966	-0.687758	-0.0364004	0.336589	0.147497	-0.181373	black	-0.349616	protein_coding
TPM2	163.016	56.737	106.279	-49.5422	-0.237145	0.410052	0.0851504	-0.253899	-0.153526	-0.496451	-0.000610322	-0.611134	-0.547288	-0.52445	-0.756085	-0.850899	-0.665487	0.280352	0.377919	-0.0833535	0.75799	0.330073	0.0835142	green	-0.582239	protein_coding
VMO1	76.2922	37.7039	38.5884	-0.88454	-0.255282	-0.642202	-0.448254	0.174883	-0.0635717	0.236474	-0.101062	0.213772	-0.0297278	0.196145	0.745479	0.328695	0.442003	-0.097077	0.273615	0.00660856	-0.576509	-0.251755	0.0357268	red	0.578923	protein_coding
CYP1A1	12.5639	2.58427	9.97961	-7.39534	-0.0027691	0.120525	-0.306855	-0.433078	-0.359383	0.373128	0.264136	-0.0765853	0.276554	-0.487159	0.0805241	0.0214469	-0.19161	0.13547	-0.12647	-0.0565224	-0.0439544	-0.359688	0.238043	grey	-0.155557	protein_coding
CD93	132.871	53.7921	79.079	-25.2869	0.123039	-0.490439	-0.192986	-0.00509496	0.0704534	0.402847	-0.0651429	0.265362	0.151763	0.36944	0.790626	0.807671	0.679997	-0.34907	-0.213155	0.136984	-0.576825	-0.163684	-0.436891	green	0.676322	protein_coding
CCN3	58.2896	30.0497	28.2399	1.80984	0.186461	0.581967	0.443623	-0.222704	-0.13959	-0.390444	-0.318677	-0.34951	-0.0592127	-0.121278	-0.410455	-0.262007	-0.470248	0.220077	-0.124919	0.178664	0.660502	0.266387	-0.0416808	brown	-0.399675	protein_coding
SECTM1	115.749	49.4621	66.2868	-16.8247	0.216373	-0.289136	-0.0578783	0.0880322	-0.113878	0.393794	-0.191779	0.216671	0.292361	0.432043	0.816498	0.779425	0.510525	-0.101702	-0.411538	0.136891	-0.483094	-0.223953	-0.165536	red	0.587011	protein_coding
C1QTNF2	47.5033	18.4682	29.0351	-10.5669	0.00384966	0.422409	0.471939	-0.15327	-0.160932	-0.403096	-0.438533	-0.0119494	0.0716424	-0.158687	-0.427335	-0.241072	-0.617983	0.332258	-0.0660958	0.258819	0.582719	0.471425	0.0698428	brown	-0.486899	protein_coding
TUBB2A	14.7742	2.79571	11.9785	-9.18276	0.115231	0.330113	0.0218415	-0.252336	-0.213826	0.145711	0.209095	0.0813317	0.047091	-0.554672	-0.221256	-0.0897621	-0.28525	0.093285	-0.206409	-0.0238001	0.195258	-0.0605346	0.0821563	purple	-0.39076	protein_coding
ALCAM	13.5674	4.11627	9.45114	-5.33487	0.135944	0.267076	-0.139861	0.0228355	-0.18663	0.421617	0.570924	-0.275615	-0.14467	-0.14803	-0.084307	-0.210675	-0.068613	-0.0352332	-0.17578	0.0653361	0.0280522	-0.306344	0.156121	pink	-0.151529	protein_coding
RGS16	47.743	20.9452	26.7978	-5.8526	0.0751925	-0.386692	-0.00114493	0.169587	0.0424063	0.386556	-0.065755	0.370005	0.204939	0.539306	0.55312	0.64889	0.435012	-0.24239	-0.202377	0.334519	-0.394631	-0.0164649	-0.300453	green	0.49785	protein_coding
CTPS1	146.069	58.8489	87.2197	-28.3708	-0.0255275	0.595798	0.310869	-0.0841653	0.115264	-0.547373	-0.008645	-0.438023	-0.315361	-0.532032	-0.852306	-0.758376	-0.603418	0.125784	0.249163	-0.172243	0.713156	0.350834	0.131003	red	-0.684386	protein_coding
EDNRA	54.3091	22.6968	31.6123	-8.91556	0.392201	0.0351955	0.24892	-0.0873382	0.094019	0.284039	-0.0547177	0.0975306	0.123053	0.45802	0.308107	0.641043	0.335938	-0.219906	-0.550585	0.19565	-0.124155	0.00950851	-0.47453	turquoise	0.258145	protein_coding
ADAMTS9	48.2032	20.2311	27.9721	-7.74095	0.449651	0.449184	0.255394	0.0806754	0.119774	0.228237	0.155117	0.363007	0.496801	-0.273113	-0.0868803	0.303563	0.038737	-0.139236	-0.54737	-0.0193251	-0.113665	-0.180466	0.102199	turquoise	-0.336288	protein_coding
ZBTB21	53.5574	16.9406	36.6169	-19.6763	0.454859	0.473017	0.160321	-0.104036	-0.00551221	0.241795	0.18941	0.306127	0.460037	-0.340546	-0.0428257	0.220122	-0.0743059	-0.00419099	-0.54978	-0.0490696	-0.090974	-0.343826	0.192661	blue	-0.442973	protein_coding
PTGS1	123.66	58.4372	65.2227	-6.78548	0.115339	-0.495022	-0.206051	0.0488565	0.0432767	0.38135	-0.0922378	0.356706	0.426755	0.486045	0.844027	0.739454	0.608553	-0.224537	-0.199565	-0.00978111	-0.631574	-0.250582	-0.151169	red	0.716365	protein_coding
CLEC1A	135.71	56.0442	79.6654	-23.6211	0.269096	-0.326249	-0.198003	0.0267172	-0.00409311	0.617223	0.158759	0.264795	0.311633	0.348595	0.729492	0.843878	0.659187	-0.269399	-0.46935	0.0406194	-0.637815	-0.411654	-0.230755	green	0.569881	protein_coding
FAP	47.8547	20.6855	27.1692	-6.48379	0.24544	-0.116868	0.250521	0.0594157	0.0214545	-0.0347777	-0.4926	0.0331862	0.193165	0.473297	0.551221	0.6374	0.389268	-0.159942	-0.277619	0.34227	-0.129974	0.151662	-0.410402	green	0.506488	protein_coding
OPN3	158.354	80.791	77.5633	3.22776	0.205954	-0.373158	-0.237727	0.254118	-0.0165658	0.504323	0.0694045	0.363392	0.249721	0.287483	0.87944	0.682452	0.655995	-0.18769	-0.318698	-0.0375092	-0.74678	-0.486933	0.065715	red	0.590262	protein_coding
FAM162B	99.897	31.5532	68.3438	-36.7906	0.363085	-0.256463	0.0791499	0.415552	0.353843	0.420571	0.157607	0.624517	0.426621	0.555901	0.523008	0.740796	0.654793	-0.357587	-0.492585	0.0109982	-0.676281	-0.189312	-0.186099	green	0.346461	protein_coding
ZNF232	58.5498	30.3576	28.1922	2.16542	0.605783	0.300657	0.440956	0.398097	0.525576	-0.0887083	0.0279597	0.555994	0.570493	0.22507	-0.0116004	0.360394	0.343306	-0.301618	-0.481902	-0.179068	-0.243982	-0.109474	-0.0475478	blue	-0.173487	protein_coding
ERP27	22.8359	4.76928	18.0666	-13.2974	0.18854	-0.287719	-0.00311649	0.355657	0.159094	0.203285	0.102423	0.137116	-0.0729868	0.606135	0.450707	0.393606	0.535581	-0.163664	-0.258265	-0.0119475	-0.426426	-0.179743	-0.180554	brown	0.424089	protein_coding
GAS2L3	178.077	50.2579	127.819	-77.5607	0.289822	-0.454404	-0.0623248	0.343511	0.227947	0.412709	0.0252696	0.594466	0.313472	0.554595	0.807069	0.823278	0.787938	-0.366583	-0.361378	0.1021	-0.769895	-0.255328	-0.246666	green	0.577424	protein_coding
DHCR24	31.9517	8.95319	22.9985	-14.0453	0.397705	0.161915	0.103633	0.101377	0.202118	0.345563	0.391885	0.479008	0.200581	-0.243714	0.0260668	0.340911	0.289393	-0.386991	-0.420524	0.199611	-0.309503	-0.162675	-0.194027	blue	-0.240062	protein_coding
AC099850.3	122.244	39.5992	82.6443	-43.0451	0.282255	-0.342795	-0.087913	0.101263	0.00111689	0.581019	0.131705	0.271556	0.240808	0.592558	0.755715	0.775765	0.593959	-0.214806	-0.489482	0.107224	-0.569799	-0.241168	-0.272601	red	0.583087	protein_coding
NGFR	70.352	34.0152	36.3368	-2.3216	0.176595	-0.405789	-0.00571021	0.0637818	0.238826	0.367544	0.024448	0.409151	0.120062	0.462892	0.558286	0.714499	0.582812	-0.462968	-0.229237	0.364344	-0.500019	0.0483191	-0.566174	green	0.42775	protein_coding
GSTT2B	19.5419	1.88816	17.6537	-15.7656	0.275876	0.47116	0.419435	0.307667	0.190365	-0.263009	0.00737263	0.435771	0.0918207	-0.402862	-0.378673	-0.233414	-0.212215	-0.00829028	-0.160513	0.0525203	0.104432	0.0986696	0.249655	magenta	-0.627828	protein_coding
SORBS2	23.6839	8.28291	15.401	-7.11806	-0.0661581	0.295668	0.139663	-0.0928139	0.0420272	-0.305823	-0.0992876	-0.534986	-0.392695	-0.116152	-0.406321	-0.427295	-0.258781	-0.0521977	0.313098	0.147394	0.528301	0.235163	-0.131102	brown	-0.203857	protein_coding
SNAP25	32.8309	6.62102	26.2099	-19.5889	0.440924	0.412517	0.61578	0.380593	0.533244	-0.352155	-0.0187405	0.151149	-0.0595839	0.132496	-0.309952	-0.0732414	0.059666	-0.316948	-0.205691	0.080216	0.145883	0.359709	-0.234753	magenta	-0.315137	protein_coding
PMP2	49.2409	11.9872	37.2537	-25.2664	0.416111	0.0747659	0.370244	0.406508	0.331191	0.0438087	-0.160726	0.841457	0.598831	0.212722	0.257743	0.49524	0.300244	-0.251016	-0.380076	0.28724	-0.396637	-0.0195214	-0.0120481	greenyellow	-0.109846	protein_coding
PPP1R14A	181.45	67.0313	114.419	-47.3873	-0.148538	0.522929	0.215508	-0.299144	-0.196933	-0.536564	-0.107311	-0.57241	-0.394203	-0.444595	-0.815795	-0.773205	-0.710334	0.320894	0.250295	-0.0267239	0.858504	0.336967	0.0978139	brown	-0.587874	protein_coding
HRCT1	102.174	8.36425	93.81	-85.4457	-0.420656	0.0799218	-0.125301	-0.281547	-0.251144	-0.423716	-0.121054	-0.25389	-0.649269	-0.753041	-0.426287	-0.695704	-0.527927	0.196548	0.580534	0.088945	0.489308	0.291328	0.0550617	purple	-0.434433	protein_coding
RERG	42.087	7.28772	34.7992	-27.5115	0.283047	0.602804	0.544298	-0.189657	0.0142591	-0.475572	-0.168512	-0.0604969	-0.213628	-0.296777	-0.553043	-0.336536	-0.471612	0.202983	-0.269175	0.0681596	0.529846	0.29521	-0.0413422	black	-0.674682	protein_coding
C3orf70	130.338	49.3841	80.9535	-31.5694	0.14494	0.739018	0.462011	-0.287474	0.0229567	-0.511835	-0.219701	-0.294423	0.0729667	-0.436093	-0.803659	-0.466178	-0.644334	0.146733	-0.0280809	0.0579295	0.788618	0.368532	0.00124376	brown	-0.714152	protein_coding
BTN3A3	209.61	90.9409	118.669	-27.728	0.554926	-0.042808	0.299269	0.165084	0.300633	0.30499	-0.159783	0.381757	0.612653	0.622992	0.632501	0.933977	0.621537	-0.417215	-0.615108	0.236301	-0.468086	-0.0691201	-0.393232	green	0.455474	protein_coding
GIMAP8	112.764	44.739	68.0254	-23.2864	0.301601	-0.315685	-0.0157009	0.0104314	0.223996	0.300468	-0.0467151	0.237982	0.152715	0.413742	0.693188	0.774766	0.707944	-0.493685	-0.304909	0.231626	-0.512594	-0.0428281	-0.575518	green	0.578745	protein_coding
PODXL	140.526	51.0702	89.4555	-38.3853	0.2867	-0.426835	-0.0872613	0.22797	0.308597	0.401881	0.113916	0.42986	0.347931	0.50884	0.692385	0.794923	0.801458	-0.487459	-0.310655	0.0362517	-0.691992	-0.204903	-0.379941	green	0.607956	protein_coding
KMO	140.783	81.8604	58.9224	22.938	-0.126778	-0.65428	-0.50838	0.100333	-0.213763	0.52874	0.0882158	0.206018	0.0243948	0.271642	0.903817	0.531474	0.531419	0.00272029	-0.0895948	-0.150936	-0.721408	-0.452786	0.0919049	red	0.703301	protein_coding
RASD1	20.7463	1.89325	18.8531	-16.9598	0.0312484	-0.135041	-0.354246	-0.0805927	-0.0505809	0.460372	0.343882	0.399882	0.363788	-0.395172	0.208945	0.303119	0.243339	-0.197692	-0.0823435	-0.0692435	-0.425713	-0.425079	0.117428	grey	0.0152492	protein_coding
TNFRSF11B	23.0046	9.26781	13.7368	-4.46902	0.443522	0.301864	0.155923	-0.0487045	-0.0413813	0.154091	0.105928	0.0959262	0.289233	0.00396217	0.128316	0.273396	0.148052	-0.087568	-0.456359	-0.0599589	-0.00268029	-0.2292	-0.0477837	blue	0.00101122	protein_coding
NPTX2	44.4722	9.74067	34.7315	-24.9909	-0.199332	0.276978	0.0501962	-0.209371	-0.187783	-0.251962	0.0750144	-0.238095	-0.356182	-0.577359	-0.598383	-0.543712	-0.558527	0.2387	0.203454	-0.0236122	0.510088	0.231141	0.0915015	brown	-0.548095	protein_coding
SMARCE1	67.026	30.8997	36.1263	-5.22655	0.533077	0.22914	0.537435	0.552335	0.637294	-0.152833	-0.0343745	0.357904	0.396352	0.593788	-0.0592847	0.299413	0.349319	-0.287892	-0.46172	-0.133064	-0.212449	0.0839892	-0.117225	blue	-0.065004	protein_coding
LBH	29.781	12.3531	17.4279	-5.07483	-0.0649147	0.222916	0.239206	-0.420455	-0.141057	-0.253939	-0.248046	-0.324762	-0.382877	-0.183677	-0.241533	-0.201885	-0.400184	-0.0361201	0.156278	0.695384	0.545728	0.557238	-0.530744	brown	-0.321005	protein_coding
MGARP	64.4486	31.7317	32.7169	-0.985142	0.565031	0.679451	0.50003	0.102399	0.161596	-0.177459	-0.0959033	0.0126153	0.49745	-0.166705	-0.225749	0.109189	-0.0302878	-0.116081	-0.437302	-0.00163615	0.22687	-0.0270087	0.0797744	blue	-0.284046	protein_coding
ATP8B4	99.1194	31.1774	67.942	-36.7645	0.502464	-0.0525981	0.252993	0.313802	0.430063	0.100176	-0.163203	0.519093	0.546862	0.419561	0.528798	0.722458	0.623703	-0.403643	-0.446541	0.0762567	-0.551769	-0.14384	-0.223703	green	0.279773	protein_coding
SPRY1	60.8161	22.4644	38.3516	-15.8872	0.170595	-0.259176	-0.233625	-0.0423176	0.0266284	0.592061	0.244684	0.359146	0.297183	0.085481	0.537083	0.646364	0.482852	-0.342463	-0.294824	0.216584	-0.555171	-0.29462	-0.264781	green	0.293584	protein_coding
PTEN	55.0823	29.0494	26.0329	3.01655	-0.0559593	-0.221304	-0.475089	0.339904	0.0856544	0.57185	0.86724	-0.017627	-0.202793	0.0331212	0.0785319	-0.191088	0.311985	-0.223245	0.099493	-0.152292	-0.471734	-0.528637	0.239375	pink	0.0734938	protein_coding
UBE2QL1	73.98	35.1741	38.8058	-3.63168	0.157732	0.639824	0.480032	-0.195369	-0.0753602	-0.540009	-0.398366	-0.394021	0.0992603	-0.305949	-0.576784	-0.270739	-0.476706	0.207781	-0.0904858	-0.0206554	0.730065	0.342114	0.0137248	brown	-0.372099	protein_coding
ACAN	20.013	3.02525	16.9878	-13.9625	0.163245	0.369537	0.184828	-0.248263	-0.35611	-0.0347181	-0.221141	-0.224054	0.0351047	-0.323431	-0.0122685	0.0698656	-0.237894	0.187686	-0.240846	0.241702	0.321027	0.0261172	0.0113474	black	-0.168936	protein_coding
TNFRSF21	148.664	79.7489	68.9148	10.8341	0.0783138	-0.471337	-0.327108	-0.0405193	-0.163888	0.566071	0.0267999	0.431972	0.342295	0.233879	0.893344	0.724083	0.507993	-0.126609	-0.282363	0.0745644	-0.681489	-0.349707	-0.0884024	red	0.572732	protein_coding
BAZ1A	202.48	50.5638	151.916	-101.353	0.613853	0.105638	0.0931748	0.0913762	0.20643	0.526173	0.226612	0.331572	0.490561	0.15197	0.546281	0.782475	0.614353	-0.443365	-0.679342	0.139941	-0.55773	-0.371832	-0.215217	green	0.241808	protein_coding
PCOLCE	67.9778	31.8372	36.1407	-4.3035	0.24491	-0.182386	0.199476	0.0905244	0.0777724	0.171382	-0.332247	0.0962508	0.308565	0.676701	0.543568	0.717736	0.390332	-0.109235	-0.395318	0.202232	-0.238597	0.0664883	-0.344172	green	0.489622	protein_coding
KCNJ2	180.847	37.4203	143.427	-106.007	0.408588	-0.193979	-0.0336343	0.273964	0.142743	0.525548	0.108182	0.434308	0.559589	0.425086	0.765471	0.789998	0.643693	-0.233507	-0.576732	-0.0646274	-0.737286	-0.407867	0.013894	brown	0.460712	protein_coding
JAM2	173.428	80.4093	93.0189	-12.6096	0.542914	-0.00859617	0.32469	0.169491	0.354743	0.240352	-0.173502	0.425692	0.689584	0.55997	0.509733	0.913748	0.587859	-0.417207	-0.589408	0.164886	-0.420875	-0.0299802	-0.376432	green	0.382906	protein_coding
NAP1L5	203.043	38.8616	164.181	-125.32	0.763948	0.870512	0.722048	0.200929	0.475847	-0.18536	0.0573863	0.119242	0.404608	-0.201348	-0.446389	0.104123	-0.0448222	-0.282908	-0.618033	-0.0178425	0.22996	0.10588	-0.0821738	black	-0.64214	protein_coding
MAOA	23.7281	6.47774	17.2504	-10.7726	0.0706969	0.228754	0.0222901	-0.180116	0.244622	-0.126972	0.345858	-0.132017	-0.25544	-0.316401	-0.458207	-0.360604	-0.14395	-0.174389	0.0810557	-0.177672	0.184086	0.0921088	-0.177592	green	-0.418541	protein_coding
CTHRC1	32.5646	10.5275	22.0371	-11.5096	0.309739	-0.0390476	0.245331	0.245609	0.178519	0.0136936	-0.311283	0.257931	0.382384	0.41863	0.489948	0.512896	0.36599	-0.213244	-0.248409	0.36989	-0.304458	0.0359437	-0.178731	green	0.251213	protein_coding
THSD7A	146.904	71.0054	75.8983	-4.89294	0.436319	-0.170097	0.11691	0.209131	0.295142	0.376531	-0.0220688	0.447509	0.533066	0.486903	0.59438	0.895111	0.698295	-0.425685	-0.509599	0.0879419	-0.581358	-0.206052	-0.320518	green	0.479055	protein_coding
SPEG	236.374	74.8193	161.555	-86.7356	-0.261666	0.408346	0.212894	-0.294368	-0.0642213	-0.629755	-0.164908	-0.585161	-0.481532	-0.433235	-0.860825	-0.812186	-0.709914	0.232715	0.43695	-0.025181	0.875817	0.511977	-0.039356	brown	-0.55905	protein_coding
TNFRSF1B	184.547	48.0062	136.541	-88.5351	0.139388	-0.519664	-0.280497	0.118869	0.0949264	0.583408	0.117796	0.310543	0.236568	0.408996	0.884845	0.809102	0.753443	-0.437561	-0.205518	0.138817	-0.724751	-0.26952	-0.337705	green	0.721297	protein_coding
CEMIP	67.2679	37.8258	29.4421	8.38375	0.0814819	-0.42479	-0.105061	0.148489	-0.0049969	0.152113	-0.287385	0.199997	0.118961	0.435502	0.773065	0.638214	0.535486	-0.103675	-0.143987	-0.0201931	-0.460206	-0.186127	-0.156612	red	0.656773	protein_coding
MAB21L2	13.5214	2.20415	11.3172	-9.11309	0.199999	0.38185	0.353692	-0.18667	0.192176	-0.304881	-0.312949	0.0245416	0.203432	-0.230861	-0.228028	0.0373342	-0.178274	-0.0954262	-0.129106	-0.0217696	0.283183	0.332518	-0.156045	grey	-0.259893	protein_coding
COL15A1	43.8132	21.0452	22.7681	-1.72289	0.18283	-0.0660878	0.205299	-0.232543	-0.0962418	0.0467139	-0.468	0.248436	0.341551	0.205743	0.391817	0.667217	0.171065	-0.0228173	-0.377342	0.206476	-0.0522724	0.177502	-0.361587	green	0.317305	protein_coding
LACTB2	254.698	134.628	120.07	14.5587	0.834551	0.513322	0.637208	0.356104	0.52203	-0.0546383	-0.0468836	0.145298	0.48443	0.401303	0.108042	0.482225	0.405577	-0.333526	-0.750411	-0.117061	-0.162535	-0.0300326	-0.165014	blue	-0.0154975	protein_coding
DNAJB5	102.297	9.54923	92.7473	-83.198	-0.231093	0.422512	0.254511	-0.545665	-0.368126	-0.503759	-0.430991	-0.110024	-0.15426	-0.593994	-0.621066	-0.526574	-0.902636	0.505578	0.131282	0.157441	0.763805	0.458776	0.0990458	lightgreen	-0.709797	protein_coding
RGS2	28.7276	8.5058	20.2218	-11.716	0.200017	-0.141949	-0.0840976	0.438544	0.0581714	0.260549	0.0603276	0.339511	0.209042	0.0701603	0.529126	0.37836	0.483191	-0.204256	-0.118967	0.0589376	-0.512747	-0.405084	0.178291	brown	0.302722	protein_coding
SOAT1	159.826	62.8131	97.0125	-34.1994	0.580107	0.0217227	0.105106	0.096113	0.141635	0.314059	0.0768341	0.194886	0.27608	0.312174	0.579067	0.72428	0.622167	-0.211747	-0.704772	-0.174604	-0.504905	-0.378748	-0.183998	turquoise	0.371482	protein_coding
EXT1	24.8663	10.1912	14.6751	-4.48394	0.120819	0.195679	-0.259439	-0.0692478	-0.187054	0.525401	0.630822	-0.119412	0.101819	-0.254652	-0.13322	-0.0277002	-0.0156855	0.0436247	-0.283914	-0.288501	-0.0728272	-0.499972	0.233642	pink	-0.127992	protein_coding
PIK3R1	48.1283	8.02492	40.1034	-32.0784	0.284342	-0.146068	-0.208195	-0.0292509	0.293435	0.609662	0.495604	0.150521	0.212439	0.189216	0.404351	0.47355	0.529848	-0.57782	-0.182713	0.131024	-0.490761	-0.289545	-0.388985	green	0.250087	protein_coding
LSP1	93.3865	59.9819	33.4046	26.5773	-0.0227997	-0.500622	-0.26788	0.069896	-0.103192	0.417736	-0.0820446	0.140347	0.242303	0.452003	0.85169	0.590676	0.465456	-0.128204	-0.07739	0.134765	-0.538937	-0.191078	-0.107704	red	0.680645	protein_coding
KMT2E	271.285	114.9	156.385	-41.4847	0.795518	0.505699	0.31284	0.034735	0.236156	0.398303	0.364688	0.128344	0.395776	0.0699657	0.161677	0.503417	0.3568	-0.372319	-0.804229	0.11227	-0.225312	-0.316711	-0.22	blue	-0.144091	protein_coding
THY1	62.9948	30.8857	32.1092	-1.22352	0.124611	-0.321476	0.0185295	0.0323991	-0.0144804	0.234158	-0.28429	0.0271224	0.225327	0.489677	0.644336	0.731542	0.498018	-0.168795	-0.277001	0.115948	-0.313466	0.00805841	-0.337715	green	0.709127	protein_coding
STON1-GTF2A1L	15.5077	2.72945	12.7782	-10.0488	0.0740844	0.307419	-0.0856835	-0.230684	-0.108811	0.0678298	0.153262	0.105218	0.23524	-0.613424	-0.211317	-0.118984	-0.205502	0.067921	-0.0723163	-0.110884	0.0281067	-0.301985	0.322514	purple	-0.390518	protein_coding
RGS5	149.545	74.5054	75.0396	-0.534147	-0.01047	0.649212	0.456873	-0.392349	-0.217326	-0.67488	-0.502969	-0.377557	-0.161524	-0.541321	-0.673133	-0.524269	-0.786179	0.375439	0.0861624	0.166982	0.887541	0.476346	0.0417055	brown	-0.685281	protein_coding
FABP4	70.7188	6.64555	64.0733	-57.4277	0.526032	0.318195	0.404602	0.324579	0.361221	0.181966	0.0233499	0.626423	0.82566	0.17227	0.0453606	0.510678	0.241296	-0.300695	-0.515639	0.131192	-0.26944	-0.0948434	0.0257368	grey60	-0.142143	protein_coding
SLC16A10	45.7743	28.0081	17.7663	10.2418	-0.0974096	-0.389324	-0.392741	-0.182063	-0.338701	0.337793	-0.059012	0.194476	0.0547994	-0.029632	0.691138	0.379593	0.237853	0.168877	-0.119757	-0.126411	-0.470046	-0.400345	0.156191	red	0.423704	protein_coding
JUN	8.96594	1.97191	6.99403	-5.02212	0.0379063	-0.129913	0.0101057	0.184461	-0.0307536	0.110124	-0.105423	0.259034	0.123222	0.0305191	0.222186	0.296687	0.119571	0.0808594	-0.179003	0.00833339	-0.252417	-0.0953872	0.0616348	grey	0.0668077	protein_coding
BMP6	29.771	7.23753	22.5335	-15.296	-0.0913363	-0.494786	-0.262426	-0.0600777	-0.204521	0.404133	0.0841896	0.330037	0.0268671	0.244538	0.515797	0.454492	0.342111	-0.065185	-0.139859	0.22211	-0.426009	-0.103818	-0.192167	green	0.467256	protein_coding
NR1D2	152.22	65.392	86.8283	-21.4363	0.714927	0.368666	0.52303	-0.0506928	0.359909	-0.0381296	-0.172609	0.218894	0.403329	0.166255	0.169183	0.660544	0.42114	-0.444654	-0.64332	0.204353	-0.0654502	0.0823579	-0.545736	blue	0.0384969	protein_coding
EIF2AK3	302.154	133.887	168.267	-34.3807	0.831965	0.353416	0.293019	0.234757	0.481851	0.347412	0.276614	0.289673	0.609077	0.177277	0.346803	0.699565	0.657049	-0.602279	-0.711294	0.00907033	-0.460918	-0.340225	-0.249071	blue	0.0881166	protein_coding
TXNL1	111.015	26.9222	84.0929	-57.1707	0.600741	0.819199	0.547524	0.201562	0.334475	-0.181022	0.138254	-0.0488988	0.366075	-0.152454	-0.535804	-0.132278	-0.172619	-0.0639584	-0.501265	-0.271138	0.276934	-0.0937596	0.207864	black	-0.578075	protein_coding
PNKD	130.119	78.3923	51.7272	26.665	-0.00208002	-0.574533	-0.363971	-0.0523705	-0.181223	0.513477	0.0523645	0.193836	0.038737	0.398254	0.898474	0.643515	0.551853	-0.0714184	-0.251078	-0.0650094	-0.61586	-0.272082	-0.168405	red	0.732881	protein_coding
WNT5A	73.1506	4.31042	68.8402	-64.5298	0.552215	0.495575	0.368732	0.227689	0.267615	0.0296986	0.12706	0.475344	0.739419	-0.0791089	-0.186046	0.205703	0.0321466	-0.0514897	-0.561575	-0.163827	-0.138104	-0.270022	0.282359	grey60	-0.425477	protein_coding
SNAP23	97.6132	24.9132	72.7	-47.7868	0.55088	0.668002	0.879996	0.0580287	0.418213	-0.465661	-0.353949	0.0553368	0.197375	0.0806986	-0.403579	0.0845696	-0.179593	-0.29452	-0.347986	0.583369	0.450341	0.584725	-0.454117	magenta	-0.500381	protein_coding
ZBED8	54.6379	5.76265	48.8753	-43.1126	0.499468	0.56346	0.569247	0.349124	0.594407	-0.250349	0.179893	-0.229986	0.0520493	0.212329	-0.497303	-0.148751	0.0668941	-0.433539	-0.163277	0.0572535	0.288585	0.231386	-0.273894	magenta	-0.310386	protein_coding
ITGB1BP2	94.1908	47.7678	46.423	1.34474	0.232972	0.660873	0.587288	-0.253379	-0.0232435	-0.544124	-0.444759	-0.340107	0.0816602	-0.120609	-0.563909	-0.21208	-0.513668	0.196937	-0.19747	0.067051	0.778994	0.457868	-0.159043	brown	-0.457816	protein_coding
PLAU	64.9237	25.6855	39.2382	-13.5527	-0.0647677	-0.5437	-0.0175363	0.114556	-0.0179765	0.0890837	-0.403876	0.25309	-0.11424	0.5256	0.695498	0.58869	0.428703	-0.103131	-0.0449968	0.267418	-0.337167	0.167465	-0.38711	red	0.611482	protein_coding
FASTKD3	315.029	163.831	151.197	12.6342	0.880248	0.425479	0.569062	0.409448	0.560878	0.050484	-0.0238678	0.24002	0.589138	0.434829	0.259185	0.66405	0.576092	-0.456962	-0.749524	-0.0569395	-0.294386	-0.12777	-0.240746	blue	0.0859464	protein_coding
ZNF217	246.321	68.279	178.042	-109.763	0.628115	0.0172536	0.121092	0.132467	0.227193	0.543295	0.203064	0.398603	0.532245	0.348533	0.664011	0.851975	0.67527	-0.473812	-0.686355	0.223034	-0.622466	-0.308302	-0.286518	green	0.355271	protein_coding
KLF4	128.658	45.1354	83.523	-38.3876	0.500133	0.00117825	0.128658	0.224594	0.232643	0.409544	0.0609448	0.58099	0.747199	0.203504	0.531152	0.777072	0.538286	-0.366912	-0.532262	0.232005	-0.605474	-0.298475	-0.0750748	green	0.175585	protein_coding
IRAK3	98.9583	33.1479	65.8104	-32.6625	0.561907	0.157897	-0.0246734	0.114673	0.265786	0.431734	0.449095	0.192727	0.344552	-0.00459076	0.374754	0.454145	0.520161	-0.382128	-0.562962	-0.270626	-0.497067	-0.438293	-0.0610845	blue	0.0979512	protein_coding
SH2B3	173.436	66.8101	106.626	-39.8155	0.278059	-0.302201	-0.230995	0.102208	-0.114472	0.612005	0.16083	0.390761	0.353534	0.245589	0.848871	0.753356	0.614029	-0.131343	-0.516726	-0.108337	-0.717933	-0.506771	0.0385282	red	0.576544	protein_coding
OAS1	91.7171	40.4103	51.3069	-10.8966	0.167661	-0.28791	0.0109277	0.0776709	-0.131521	0.414822	-0.186692	0.343484	0.344146	0.500704	0.693356	0.761129	0.391368	-0.0546524	-0.405175	0.252819	-0.411733	-0.13948	-0.152292	green	0.502591	protein_coding
PRTFDC1	182.646	92.3057	90.3405	1.9652	0.776308	0.54785	0.596146	0.337051	0.518316	0.0326069	0.0986604	0.239223	0.638913	0.353492	-0.0940166	0.421716	0.313525	-0.388614	-0.682163	-0.0904909	-0.0608753	-0.0540816	-0.130351	blue	-0.112638	protein_coding
CLIC3	30.118	8.66863	21.4494	-12.7808	0.281809	0.00807907	0.390166	0.0820004	0.206299	0.119517	-0.205791	0.4583	0.439254	0.521218	0.235587	0.511946	0.17071	-0.28947	-0.313258	0.522883	-0.0968536	0.302991	-0.389742	green	0.118025	protein_coding
ZNF385D	57.2764	22.088	35.1884	-13.1004	0.114584	0.474544	0.393537	-0.133628	0.140858	-0.537585	-0.133511	-0.492838	-0.445277	-0.196533	-0.632749	-0.421345	-0.323568	0.0426095	0.005894	-0.116943	0.651942	0.401505	-0.237654	brown	-0.386369	protein_coding
TLR5	169.032	35.2029	133.829	-98.626	0.311345	-0.375395	-0.151476	0.187645	0.176613	0.591961	0.196674	0.35693	0.527598	0.691374	0.785	0.803555	0.730025	-0.35011	-0.432913	0.0180314	-0.730707	-0.379654	-0.174705	brown	0.653626	protein_coding
RAB7A	207.33	105.525	101.805	3.71998	0.792482	0.446326	0.431818	-0.0257034	0.318576	0.0818497	-0.0458469	0.12175	0.476227	0.121946	0.275212	0.634436	0.427548	-0.402106	-0.692397	0.0683235	-0.140854	-0.0953082	-0.375444	blue	0.03789	protein_coding
CKB	32.1779	15.7455	16.4324	-0.686883	-0.0288851	0.384806	0.241134	-0.267262	0.0288456	-0.399186	-0.121001	0.246011	0.170542	-0.467237	-0.648489	-0.418942	-0.56351	0.165701	0.0824586	0.0336912	0.438874	0.291683	0.0974722	red	-0.713295	protein_coding
KLHL13	119.529	43.946	75.5825	-31.6365	0.598676	0.782008	0.651912	-0.00169944	0.179624	-0.301594	-0.262277	0.144803	0.504413	-0.261982	-0.332738	0.137132	-0.186784	0.00207521	-0.589071	-0.0624554	0.287923	0.130087	0.0802902	blue	-0.465526	protein_coding
IL33	232.939	126.221	106.717	19.5037	0.733248	0.366144	0.530314	0.170085	0.295715	0.0210449	-0.101945	0.119646	0.296212	0.406462	0.191858	0.603378	0.399361	-0.209	-0.787388	-0.00245062	-0.115843	-0.0421201	-0.308397	turquoise	0.0610542	protein_coding
NDUFA4L2	21.8165	9.69131	12.1252	-2.43392	0.0176282	-0.29877	-0.24805	-0.176386	-0.208515	0.268608	-0.0589728	-0.0917627	-0.118974	0.172251	0.570683	0.405695	0.342321	-0.0991474	-0.0706978	0.204447	-0.232264	-0.202769	-0.261188	red	0.410147	protein_coding
ABCE1	281.187	148.04	133.147	14.8926	0.865736	0.481604	0.537173	0.274354	0.593497	0.0621586	0.0528593	0.443705	0.522657	0.0386653	0.164154	0.630267	0.526116	-0.600876	-0.695253	0.078358	-0.306971	-0.0837594	-0.323487	blue	-0.131131	protein_coding
CSDC2	212.403	81.1119	131.291	-50.1796	-0.368916	0.342693	0.0795127	-0.501079	-0.301424	-0.601674	-0.276149	-0.649733	-0.501734	-0.575483	-0.734416	-0.780679	-0.796956	0.401714	0.438752	-0.0581452	0.895715	0.468221	0.0223302	brown	-0.499426	protein_coding
UGCG	151.731	60.5433	91.1872	-30.6438	0.436472	-0.192424	0.00608393	0.273423	0.224927	0.569972	0.173974	0.306486	0.3319	0.475806	0.685667	0.864412	0.767615	-0.510041	-0.482158	0.205397	-0.622401	-0.307683	-0.339923	green	0.545007	protein_coding
HCST	108.137	63.4109	44.7257	18.6852	0.0991258	-0.424213	-0.168095	0.18139	-0.0830919	0.392453	-0.106071	0.345191	0.182037	0.395842	0.854472	0.655417	0.523703	-0.0877625	-0.281158	0.0651663	-0.607755	-0.259845	-0.0577745	red	0.59095	protein_coding
CASP1	233.302	80.9028	152.399	-71.4964	0.376438	-0.341369	-0.0420198	0.342672	0.22599	0.49781	0.0502484	0.451588	0.40998	0.52843	0.883278	0.875124	0.805639	-0.425123	-0.400932	0.107188	-0.77529	-0.322932	-0.196897	red	0.656479	protein_coding
FLNA	204.72	84.4379	120.282	-35.8441	-0.371317	0.319068	0.0713045	-0.536434	-0.351051	-0.552331	-0.263257	-0.663805	-0.581451	-0.521868	-0.710898	-0.746107	-0.781152	0.392399	0.412116	0.0733074	0.906715	0.471514	-0.0812816	brown	-0.484549	protein_coding
SGCG	30.0145	1.84534	28.1691	-26.3238	0.380056	0.359803	0.322022	0.0101724	-0.0844932	-0.0577131	-0.268809	0.133925	0.340779	-0.209563	0.074586	0.369045	0.0311723	0.0197614	-0.439734	0.166597	0.0666052	-0.0503029	-0.0238205	black	-0.153945	protein_coding
ITGA7	170.807	83.2052	87.6019	-4.39664	-0.218653	0.419339	0.251906	-0.52242	-0.177964	-0.594175	-0.31635	-0.51614	-0.445157	-0.483511	-0.730244	-0.631505	-0.76553	0.278856	0.307596	0.0728855	0.919167	0.583867	-0.186028	brown	-0.575518	protein_coding
CPXM1	21.277	11.3528	9.92422	1.42859	-0.0348353	-0.292747	0.0404712	0.282015	0.16592	0.0757524	-0.0843731	-0.237967	-0.00806385	0.832427	0.275771	0.208112	0.30249	-0.123699	0.0469154	0.105721	-0.121929	0.134339	-0.216709	purple	0.551833	protein_coding
TSC22D3	21.4313	3.12509	18.3062	-15.1811	-0.127942	-0.126026	-0.355812	-0.356457	-0.0848334	0.206564	0.270478	-0.102562	-0.229475	-0.450462	0.126618	-0.0788657	0.0329374	-0.213038	0.244041	0.190851	-0.119025	-0.109278	-0.179426	grey	-0.0666138	protein_coding
JSRP1	338.239	268.802	69.4366	199.366	-0.64586	-0.492337	-0.380192	-0.00667625	-0.00322406	-0.215085	-0.112386	-0.30278	-0.514014	-0.133105	-0.0228024	-0.406986	-0.0777813	-0.114395	0.936917	0.227003	0.10346	0.279081	-0.168436	turquoise	0.197845	protein_coding
GRIA2	24.6999	8.05541	16.6445	-8.58907	0.316232	0.633871	0.361521	-0.119422	-0.0242476	-0.125209	0.0188891	-0.165504	0.167364	-0.31422	-0.400829	-0.139004	-0.350679	0.0705904	-0.33396	0.0207156	0.357706	0.0703391	0.0885416	black	-0.482915	protein_coding
CREB5	46.4515	20.3421	26.1094	-5.76732	0.363435	0.401209	0.11712	0.0660266	-0.0447818	0.284266	0.189361	0.411882	0.677724	-0.237367	-0.0657367	0.229319	-0.0605057	0.0718535	-0.522769	-0.126325	-0.144555	-0.380327	0.390785	turquoise	-0.337902	protein_coding
GSAP	204.704	55.8986	148.806	-92.907	0.506767	-0.146021	-0.0316064	0.43004	0.311273	0.608211	0.362215	0.496092	0.446913	0.423216	0.715544	0.710093	0.754485	-0.444844	-0.546228	-0.0102812	-0.830039	-0.47141	-0.0399651	brown	0.399857	protein_coding
DKK1	13.5566	2.64975	10.9068	-8.25705	0.115165	-0.00523366	-0.291294	-0.100733	0.0596585	0.313993	0.479388	-0.0263354	0.233761	-0.135531	0.0491423	0.0485711	0.157021	-0.0766384	-0.159117	-0.409642	-0.277166	-0.416539	0.123273	brown	0.00665309	protein_coding
PIK3C2A	35.5907	11.053	24.5377	-13.4846	0.348385	0.132218	-0.12241	-0.0297714	0.159486	0.561382	0.690117	0.0386131	0.163458	0.0104737	0.00861991	0.231492	0.339694	-0.36644	-0.373706	-0.235042	-0.248194	-0.407201	-0.0989517	pink	0.0788471	protein_coding
PDZRN4	71.4783	37.9833	33.495	4.48826	0.166852	0.568556	0.505973	0.0949981	0.339831	-0.530991	-0.0464581	-0.168624	-0.309388	-0.246853	-0.78568	-0.509022	-0.371356	-0.108308	0.0714309	0.1433	0.580242	0.450006	-0.164028	red	-0.701173	protein_coding
UAP1	41.7935	18.5591	23.2344	-4.67539	0.476036	0.457289	0.154197	0.124809	0.293983	0.152468	0.25432	0.274552	0.650451	-0.329136	-0.111957	0.198013	0.146622	-0.306785	-0.364114	-0.135373	-0.18454	-0.287432	0.155378	blue	-0.297991	protein_coding
G0S2	65.419	4.19162	61.2274	-57.0358	0.25732	-0.307713	-0.035599	0.441718	0.275706	0.344523	0.0506676	0.198552	0.153819	0.514692	0.625836	0.643299	0.772811	-0.480689	-0.206879	0.0835595	-0.553635	-0.19118	-0.270483	lightgreen	0.667745	protein_coding
VGLL3	294.396	115.235	179.161	-63.9261	0.798212	0.531878	0.336522	0.11164	0.237913	0.341595	0.264568	0.398706	0.700354	-0.00324659	0.143494	0.547806	0.338356	-0.294761	-0.831505	-0.042874	-0.296162	-0.402376	0.0287561	blue	-0.151981	protein_coding
ZSWIM9	285.106	204.292	80.8142	123.477	-0.677965	-0.448108	-0.483741	-0.035361	-0.0990779	-0.101064	0.00444056	-0.189251	-0.381533	-0.239423	-0.0873053	-0.460008	-0.152406	-0.022003	0.866107	0.0939374	0.059167	0.134605	0.0535727	turquoise	0.116963	protein_coding
ENPP2	44.8325	14.3952	30.4373	-16.042	0.403515	0.175096	0.353512	-0.103644	0.150014	0.0485957	-0.281505	0.145844	0.334233	0.0258773	0.269771	0.620896	0.270631	-0.367514	-0.349502	0.423084	-0.037098	0.221083	-0.516974	green	0.143332	protein_coding
C5orf46	12.2114	1.32044	10.8909	-9.57049	-0.240141	-0.0521787	-0.306781	0.187656	-0.20461	0.155246	0.365846	-0.222668	-0.18259	0.0984095	-0.148728	-0.438632	-0.185155	0.291872	0.151933	-0.377186	0.0495109	-0.286089	0.431494	grey	-0.0175722	protein_coding
ZNRF3	108.134	40.7483	67.3856	-26.6372	0.207852	0.685265	0.438283	-0.314502	0.154154	-0.550797	-0.0644153	-0.399855	-0.312768	-0.535011	-0.78319	-0.510208	-0.489027	0.00714947	0.000679898	-0.0305785	0.722788	0.385417	-0.214269	red	-0.720338	protein_coding
SMOC2	90.0086	46.2803	43.7283	2.55205	0.113366	0.595631	0.590397	-0.245552	0.00916439	-0.704207	-0.551293	-0.495202	-0.18613	-0.236198	-0.528271	-0.338285	-0.545173	0.179819	0.00749573	0.105871	0.812302	0.623905	-0.212083	brown	-0.416778	protein_coding
GASK1B	84.6274	20.5721	64.0552	-43.4831	0.43833	0.659163	0.701882	-0.13332	0.0410975	-0.405851	-0.43903	-0.117906	0.104892	-0.0543037	-0.31311	0.0729524	-0.289816	0.0337766	-0.383709	0.282288	0.577459	0.402166	-0.24272	brown	-0.362893	protein_coding
POMZP3	11.1651	1.82204	9.34302	-7.52098	0.186815	0.166987	0.0832043	-0.175697	0.274599	-0.00434882	0.181524	0.236282	0.258842	-0.262328	-0.177	0.0655742	0.0731938	-0.385513	-0.0502724	0.112414	-0.0212266	0.121756	-0.304967	grey	-0.235511	protein_coding
AGL	256.278	144.63	111.648	32.9824	0.849332	0.674894	0.410216	0.152543	0.402081	0.221167	0.430075	0.064613	0.398195	0.000206371	-0.133158	0.30093	0.295612	-0.397597	-0.730906	-0.167844	-0.0636636	-0.313334	-0.123645	blue	-0.290967	protein_coding
SEC23B	336.852	129.112	207.74	-78.6278	0.828842	0.367026	0.326302	0.247908	0.390665	0.366472	0.280438	0.344589	0.468069	0.143219	0.337303	0.682251	0.591662	-0.47707	-0.82267	-0.0531842	-0.425858	-0.318792	-0.213217	blue	0.0467465	protein_coding
HERPUD1	155.219	29.7494	125.47	-95.7201	0.692984	0.202354	0.219888	0.424656	0.51286	0.373194	0.260925	0.245044	0.567724	0.26649	0.414832	0.675574	0.718312	-0.695566	-0.454599	0.180577	-0.502096	-0.309658	-0.255641	green	0.204238	protein_coding
KDSR	228.565	133.648	94.9172	38.7312	0.844287	0.712614	0.66273	0.124004	0.487174	-0.184966	-0.0170334	0.0810272	0.427164	0.119882	-0.152414	0.295655	0.209127	-0.334794	-0.681144	-0.0240422	0.0753445	0.0151199	-0.229983	blue	-0.306112	protein_coding
GTF2H3	370.835	152.957	217.878	-64.9214	0.859759	0.563025	0.574971	0.224496	0.353845	0.128093	0.0842354	0.185197	0.492529	0.228651	0.115794	0.524451	0.329199	-0.285647	-0.857554	0.0133446	-0.17064	-0.153932	-0.140041	blue	-0.108014	protein_coding
FLRT2	82.3401	33.5633	48.7767	-15.2134	0.173521	-0.368007	-0.146583	0.0981389	0.0503109	0.633607	0.149379	0.531396	0.470825	0.460466	0.62846	0.760835	0.536805	-0.28159	-0.342109	0.184551	-0.602067	-0.312128	-0.148062	green	0.466289	protein_coding
AKAP1	171.424	66.7661	104.658	-37.8915	-0.329634	0.27412	0.177852	-0.437606	-0.159957	-0.639823	-0.314982	-0.569792	-0.559924	-0.335012	-0.734297	-0.69309	-0.692545	0.317583	0.402332	-0.000716267	0.861442	0.540502	-0.143299	brown	-0.444795	protein_coding
MTUS2	103.49	41.5147	61.9757	-20.461	0.0539041	0.619497	0.332855	-0.187923	-0.0388752	-0.443881	-0.071785	-0.665649	-0.180156	-0.280578	-0.743665	-0.556781	-0.533465	0.184165	0.0554231	-0.112483	0.769985	0.316262	0.017252	brown	-0.442584	protein_coding
ME1	236.967	126.008	110.959	15.0486	0.815253	0.82091	0.613231	0.0910204	0.403344	-0.119756	0.109649	0.218442	0.481196	-0.229761	-0.298704	0.171269	0.0537113	-0.246606	-0.696054	-0.188383	0.0947676	-0.0786147	0.0112385	blue	-0.502011	protein_coding
SCUBE3	115.785	54.7032	61.0813	-6.37805	-0.162273	0.480526	0.194537	-0.488708	-0.348954	-0.448244	-0.240484	-0.578948	-0.344669	-0.592751	-0.67494	-0.561635	-0.722443	0.394508	0.160246	0.0116247	0.846098	0.322603	0.0364892	brown	-0.502046	protein_coding
CST7	12.3438	1.68609	10.6578	-8.97166	-0.0280004	-0.21659	-0.313992	-0.23197	-0.234954	0.433784	0.193461	0.236917	0.29812	0.0962516	0.417718	0.209172	0.0933827	0.0242295	-0.0761814	-0.00382362	-0.308566	-0.329793	0.153924	grey	0.253548	protein_coding
CD300A	132.535	83.8118	48.7233	35.0885	-0.143616	-0.6444	-0.521333	0.0643138	-0.165353	0.566748	0.157751	0.178164	0.0495499	0.304407	0.897384	0.46311	0.511851	-0.113721	0.0352805	-0.0301492	-0.697054	-0.408319	0.0351764	red	0.732341	protein_coding
COL14A1	122.516	54.238	68.2783	-14.0404	-0.0244584	0.543744	0.47557	-0.288549	-0.0637862	-0.724239	-0.460915	-0.486504	-0.310308	-0.341397	-0.733233	-0.511447	-0.646982	0.302621	0.136068	0.105465	0.851418	0.503378	-0.0605393	brown	-0.589816	protein_coding
AMPH	45.4686	14.8032	30.6654	-15.8621	0.378417	0.710649	0.499655	-0.0891747	0.127628	-0.428261	-0.287187	-0.0792778	0.323035	-0.442744	-0.428863	-0.0966281	-0.285613	0.016938	-0.294593	-0.0262169	0.411454	0.202855	0.0473127	black	-0.51798	protein_coding
BMP2	62.2476	23.7423	38.5053	-14.763	0.395881	0.158691	0.17502	0.0618457	0.0417933	0.394784	0.0683205	0.694667	0.603821	-0.0142457	0.278416	0.548268	0.146163	-0.132159	-0.562129	0.1875	-0.341685	-0.191939	0.0308875	turquoise	-0.155989	protein_coding
SCARA3	34.9148	14.7435	20.1713	-5.42778	0.164626	0.463906	0.482527	-0.251633	0.0593058	-0.564034	-0.459328	-0.147959	0.0508947	-0.241605	-0.479431	-0.114474	-0.293908	0.00708641	-0.0188769	0.127303	0.615447	0.43447	-0.240404	brown	-0.294703	protein_coding
ADAMTS8	17.296	5.22148	12.0745	-6.85301	0.141078	0.323812	0.48129	0.123297	0.167173	-0.400603	-0.445399	-0.347324	0.0471217	0.27765	-0.204114	-0.0354597	-0.160927	0.0163064	-0.0536013	0.162029	0.416688	0.405989	-0.162835	brown	-0.0451097	protein_coding
SLC16A3	69.5333	41.5961	27.9372	13.6589	-0.219101	-0.577201	-0.56884	-0.138823	-0.415496	0.547484	0.117668	0.114044	-0.0770561	0.0860043	0.793514	0.39425	0.319266	0.0723382	-0.0169871	-0.0596557	-0.510168	-0.413371	0.0371276	red	0.601259	protein_coding
PLA1A	20.484	1.78228	18.7017	-16.9194	0.318598	0.118679	0.253168	-0.0258189	0.297	0.292779	0.138842	0.348536	0.529481	0.282417	0.0501997	0.423664	0.140152	-0.372288	-0.367589	0.23388	-0.129114	0.17002	-0.329143	grey	-0.0183114	protein_coding
SHROOM3	125.912	44.3885	81.5231	-37.1346	0.227473	0.757301	0.448014	-0.127802	-0.0269315	-0.396013	-0.0494626	-0.434783	-0.085681	-0.358616	-0.766721	-0.454766	-0.533058	0.197259	-0.160089	-0.0904256	0.739935	0.193149	0.0822361	brown	-0.627431	protein_coding
CD86	114.045	65.9963	48.049	17.9473	0.03986	-0.438292	-0.374328	0.195378	-0.185161	0.553373	0.0754186	0.176745	0.220349	0.31544	0.859906	0.596266	0.557655	-0.0185321	-0.242289	-0.171267	-0.661693	-0.519158	0.180473	red	0.68858	protein_coding
MALL	59.0306	32.2081	26.8225	5.38553	0.220367	-0.206923	0.283565	-0.0278619	0.17871	0.0394018	-0.446622	0.569543	0.476991	0.443353	0.47375	0.734179	0.329253	-0.289814	-0.266307	0.502982	-0.255566	0.275621	-0.472854	green	0.302154	protein_coding
PCDH17	153.887	66.3301	87.5565	-21.2264	0.416565	-0.241378	0.0307259	0.212623	0.2748	0.470293	0.126617	0.577912	0.481434	0.416844	0.61371	0.865741	0.705057	-0.430156	-0.515471	0.0586556	-0.655966	-0.230454	-0.31302	green	0.431071	protein_coding
TLR3	205.134	35.7518	169.382	-133.63	0.69538	0.214263	0.567884	0.371071	0.487512	0.053423	-0.15651	0.469646	0.669068	0.591654	0.261975	0.736835	0.507793	-0.3565	-0.703299	0.117185	-0.314138	0.00118473	-0.252006	green	0.137939	protein_coding
ALG14	233.263	124.955	108.308	16.6476	0.819403	0.458333	0.743999	0.44887	0.627682	-0.129181	-0.178309	0.389262	0.514721	0.428374	0.130574	0.558876	0.427686	-0.470612	-0.670281	0.115833	-0.165994	0.178189	-0.34429	blue	-0.049911	protein_coding
ARHGEF9	118.907	65.3712	53.536	11.8352	0.134842	0.678999	0.506139	-0.455314	-0.0820257	-0.486401	-0.299094	-0.361152	-0.109744	-0.349694	-0.666687	-0.382237	-0.66075	0.13472	-0.052599	0.268694	0.863015	0.543997	-0.258073	brown	-0.62458	protein_coding
HLF	42.9797	1.97965	41.0001	-39.0204	0.411582	0.540344	0.674164	0.175664	0.567531	-0.479792	-0.14056	0.0985656	0.155907	-0.0934512	-0.540363	-0.0904712	-0.124542	-0.30413	-0.151694	0.22023	0.297772	0.446768	-0.311544	tan	-0.573186	protein_coding
PIP4P2	150.95	40.9549	109.995	-69.0402	0.645854	0.866852	0.756861	-0.0697615	0.295328	-0.431039	-0.165794	-0.233505	0.0989529	-0.0709922	-0.504832	-0.0785951	-0.204228	-0.130237	-0.467741	0.0984561	0.549086	0.309187	-0.266208	black	-0.518273	protein_coding
INHBB	68.3094	15.704	52.6054	-36.9013	0.242547	-0.236597	-0.0565793	0.230529	0.216237	0.461442	0.0731235	0.452787	0.380486	0.243762	0.583342	0.701068	0.549401	-0.369548	-0.285073	0.182627	-0.610917	-0.238068	-0.170614	brown	0.311012	protein_coding
FOSB	20.0736	1.36372	18.7098	-17.3461	0.134794	0.212368	0.124551	-0.0592685	-0.19996	0.168325	-0.150054	0.324304	0.479936	-0.170135	0.0965014	0.233958	-0.18034	0.174715	-0.301554	0.212704	-0.0362958	-0.104515	0.243725	grey60	-0.212245	protein_coding
JAM3	60.8281	16.9627	43.8654	-26.9027	0.29068	0.484487	0.77407	-0.0685456	0.236039	-0.609482	-0.602226	0.0883486	0.0375808	-0.0240855	-0.365584	0.0213256	-0.291172	-0.145096	-0.113671	0.688304	0.538185	0.704665	-0.457825	magenta	-0.477916	protein_coding
DNASE1L3	55.4536	17.3386	38.1151	-20.7765	0.147054	-0.386262	0.0286862	0.329033	0.254626	0.135437	-0.146075	0.282388	-0.0442264	0.373282	0.649614	0.588142	0.632845	-0.427406	-0.0898143	0.277861	-0.493643	0.110769	-0.469498	red	0.511341	protein_coding
GOLGA6L10	82.745	44.7369	38.008	6.72891	0.609682	0.423312	0.0680599	0.131974	0.316943	0.302217	0.651422	-0.0900611	0.124492	-0.0742925	-0.0675419	0.104183	0.375745	-0.365529	-0.496252	-0.350083	-0.219068	-0.440667	-0.026822	blue	-0.105812	protein_coding
NLGN4Y	14.8824	5.38711	9.49525	-4.10813	0.0748433	-0.221196	0.128209	0.292186	0.317743	-0.0782059	-0.183992	0.228415	0.210614	0.645631	0.161499	0.301126	0.358597	-0.154404	-0.0640876	-0.0160045	-0.233591	0.0757504	-0.169988	purple	0.333492	protein_coding
CCRL2	128.833	51.21	77.6234	-26.4134	0.031894	-0.579375	-0.247306	0.168723	-0.0268491	0.470292	-0.0274863	0.28835	0.142982	0.475479	0.818773	0.750287	0.639994	-0.194392	-0.210995	0.0549118	-0.636536	-0.229298	-0.210976	red	0.723746	protein_coding
RPS27L	141.901	87.5607	54.3407	33.2201	0.767594	0.539473	0.59398	0.659817	0.569304	-0.0875117	0.0479683	0.212909	0.380683	0.206292	0.00378842	0.308565	0.424108	-0.406846	-0.556532	-0.057116	-0.204152	-0.136594	0.0112415	blue	-0.104912	protein_coding
SLCO4A1	40.9377	6.19464	34.7431	-28.5485	0.0853883	-0.243728	-0.317463	-0.194448	-0.0843713	0.532069	0.198836	0.341172	0.412383	-0.0394074	0.475513	0.545722	0.326265	-0.125161	-0.30761	-0.180479	-0.490711	-0.363704	-0.0156935	red	0.294964	protein_coding
H2AC6	42.6909	5.6555	37.0354	-31.3799	0.315509	-0.0576448	-0.275467	-0.0832502	0.00700383	0.653512	0.593827	0.130451	0.305915	0.0815711	0.332061	0.400577	0.43168	-0.246837	-0.402406	-0.196336	-0.460858	-0.593405	0.0369474	brown	0.235603	protein_coding
CHIC2	174.977	46.7136	128.264	-81.5501	0.62763	0.113995	0.266848	0.24588	0.208096	0.435583	0.112443	0.406237	0.419478	0.313808	0.53849	0.773933	0.574292	-0.442376	-0.666298	0.422902	-0.478196	-0.212962	-0.290962	green	0.194914	protein_coding
ODC1	85.1342	46.1997	38.9346	7.26509	0.137691	0.5585	0.501892	0.210717	0.409574	-0.51829	0.0145143	-0.0915749	-0.149487	-0.233568	-0.813291	-0.583818	-0.425186	-0.100279	0.139457	0.0984798	0.513576	0.448683	-0.0440333	red	-0.767082	protein_coding
FAM49A	81.8702	26.5484	55.3218	-28.7734	0.409979	-0.0010916	0.0510827	0.0573836	0.141284	0.473204	0.091341	0.428326	0.624305	0.206788	0.568012	0.673297	0.416594	-0.326075	-0.452295	0.165997	-0.505452	-0.282605	-0.0865659	green	0.240101	protein_coding
ACSL1	36.4573	8.78278	27.6745	-18.8918	0.2496	-0.0798277	-0.225874	-0.0512128	0.0723228	0.298235	0.230485	0.21814	0.117381	-0.221948	0.472985	0.337249	0.411518	-0.255342	-0.206189	-0.183499	-0.475593	-0.388632	-0.0319049	brown	0.155689	protein_coding
SDK1	102.382	51.7128	50.6691	1.04373	-0.0793953	0.536036	0.318477	-0.480753	-0.217044	-0.607118	-0.447491	-0.446477	-0.196245	-0.532615	-0.645136	-0.466395	-0.708113	0.342951	0.0931025	0.033401	0.832396	0.437655	-0.0491491	brown	-0.561977	protein_coding
ANGPTL4	32.2137	10.4616	21.7521	-11.2904	-0.425814	-0.523378	-0.484603	-0.00533096	-0.235855	-0.0375764	-0.165773	-0.247373	-0.308105	-0.0321758	0.349309	0.0155611	0.202212	0.1523	0.365831	-0.299658	-0.184032	-0.174348	0.0831822	blue	0.516508	protein_coding
TOGARAM1	333.249	26.9494	306.3	-279.35	0.844888	0.305759	0.355118	0.306312	0.545251	0.314431	0.267788	0.290222	0.576728	0.353854	0.306013	0.732622	0.705722	-0.559595	-0.77551	-0.110469	-0.457855	-0.315391	-0.278662	yellow	0.147523	protein_coding
NBEAL1	32.7335	10.2083	22.5252	-12.3169	0.386829	0.425741	-0.00669388	-0.0475996	0.000761816	0.405137	0.555867	-0.196845	0.0764282	-0.0803749	-0.164732	0.00314552	0.0262341	-0.101142	-0.403381	-0.1402	0.0279453	-0.436558	0.0720878	blue	-0.249905	protein_coding
SOCS3	55.0521	25.3832	29.6689	-4.28565	-0.0180508	-0.444559	-0.185616	-0.0565754	-0.052843	0.398746	-0.134945	0.274996	0.233306	0.359771	0.638356	0.689789	0.449047	-0.251385	-0.112604	0.333873	-0.413985	-0.0619106	-0.337525	green	0.567453	protein_coding
EFNA1	130.738	63.2096	67.5283	-4.31871	0.299983	-0.352264	-0.0216571	0.280524	0.309524	0.401354	0.00731103	0.34829	0.458823	0.607796	0.658007	0.863055	0.763164	-0.433353	-0.340634	0.0114333	-0.628562	-0.218001	-0.329659	green	0.656574	protein_coding
SERPINF1	64.2938	33.3323	30.9615	2.37084	0.251245	-0.225317	0.0605516	-0.0615808	0.208425	0.169049	-0.243985	0.316434	0.613892	0.515874	0.527442	0.729368	0.45025	-0.224462	-0.338529	0.0257413	-0.409045	-0.0556905	-0.286077	green	0.450674	protein_coding
KLHL21	99.9995	33.1828	66.8167	-33.634	-0.16752	0.276401	0.167792	-0.244395	0.126032	-0.611936	-0.162937	-0.609169	-0.511665	-0.364319	-0.653631	-0.581907	-0.361057	-0.0605038	0.463228	0.00440506	0.693345	0.484405	-0.311918	brown	-0.318173	protein_coding
NDUFAF4	54.915	16.4816	38.4334	-21.9518	0.356345	0.744582	0.34226	-0.320552	0.130954	-0.31713	-0.00444004	-0.228829	0.228708	-0.597386	-0.573486	-0.253074	-0.343938	-0.0741195	-0.175157	-0.0776686	0.471253	0.0686161	-0.000206052	black	-0.599002	protein_coding
HIRA	13.2266	1.50619	11.7204	-10.2142	0.239589	0.288408	0.379467	-0.0977074	0.101127	-0.028746	-0.130282	-0.0844865	-0.0489742	0.197755	-0.155476	0.135711	-0.0786725	-0.211761	-0.177313	0.599285	0.288794	0.299231	-0.442212	cyan	-0.165351	protein_coding
LEP	27.8917	9.40244	18.4893	-9.08683	-0.264234	-0.514456	-0.47823	0.069989	-0.152461	0.185015	0.0358493	0.0941986	-0.0875647	0.0792642	0.528877	0.113966	0.267968	0.0887287	0.192596	-0.264643	-0.468411	-0.346095	0.207844	red	0.42761	protein_coding
CD34	67.5201	5.81767	61.7025	-55.8848	0.369192	0.0293736	0.212104	0.000377584	0.103285	0.304068	-0.0593474	0.444247	0.805154	0.383346	0.31874	0.663729	0.248045	-0.126611	-0.553547	0.133422	-0.312302	-0.0894928	-0.0786858	grey60	0.179965	protein_coding
PTHLH	29.4635	11.8759	17.5876	-5.71168	0.405318	0.422576	0.38317	0.142286	0.0487873	-0.163437	-0.199261	0.198363	0.507082	-0.12275	-0.0751921	0.183367	-0.0380445	0.0689424	-0.405531	0.032015	0.0421287	-0.100948	0.197746	blue	-0.268523	protein_coding
PMEPA1	123.515	55.1786	68.3364	-13.1577	-0.0809498	0.529603	0.2684	-0.317811	-0.0740692	-0.638009	-0.305816	-0.58523	-0.261303	-0.486874	-0.737278	-0.565193	-0.592926	0.235163	0.222659	-0.143862	0.827481	0.358227	-0.0326579	brown	-0.496794	protein_coding
HEY2	86.4985	27.5754	58.9231	-31.3477	0.0666107	0.517499	0.355347	-0.117368	0.112315	-0.534549	-0.0463849	-0.482437	-0.429779	-0.341388	-0.741269	-0.578826	-0.423912	0.0379012	0.178209	-0.00250371	0.700179	0.318071	-0.102647	brown	-0.536415	protein_coding
PTGIS	69.0575	31.0012	38.0563	-7.05504	0.0862116	0.397377	0.594525	-0.207318	0.0177313	-0.723237	-0.658286	-0.335827	-0.259984	0.00368803	-0.407687	-0.180802	-0.366221	0.129202	0.00520341	0.246107	0.733224	0.663424	-0.372382	brown	-0.252037	protein_coding
RUNDC3B	98.9011	7.87784	91.0233	-83.1455	0.529399	0.110246	0.473827	0.277961	0.450525	0.0598736	-0.155288	0.780025	0.682989	0.421635	0.226132	0.651239	0.35805	-0.293634	-0.565542	0.127843	-0.376049	0.0483156	-0.156064	greenyellow	-0.00114169	protein_coding
COL21A1	92.4106	31.545	60.8656	-29.3206	0.47147	0.832948	0.530299	-0.120656	0.145026	-0.282688	-0.0551658	-0.269968	0.208027	-0.369566	-0.546655	-0.140889	-0.30729	-0.0743237	-0.290083	-0.00324495	0.556926	0.150367	-0.0435015	black	-0.540602	protein_coding
LEPR	112.055	41.326	70.7288	-29.4028	0.471353	-0.0229088	0.315216	0.218234	0.338221	0.124333	-0.239751	0.667433	0.760981	0.432653	0.464407	0.765457	0.479353	-0.293712	-0.519012	0.148851	-0.491932	-0.0627567	-0.13829	green	0.223964	protein_coding
ARG1	29.8171	5.70658	24.1106	-18.404	-0.270764	-0.253519	-0.478096	-0.044953	-0.0336519	0.286219	0.492846	0.0961381	-0.0209671	-0.239344	0.018121	-0.306531	-0.0220565	-0.0935862	0.379153	-0.0461536	-0.255738	-0.242603	0.216249	pink	-0.0560735	protein_coding
BMX	33.2036	10.3843	22.8193	-12.435	0.135677	-0.323408	-0.146986	-0.0330626	0.0763784	0.429042	0.177815	0.251863	0.297683	0.371977	0.476942	0.531589	0.405045	-0.195852	-0.29574	-0.0625836	-0.457556	-0.123691	-0.225178	green	0.441903	protein_coding
LAMP1	17.0067	6.45429	10.5524	-4.09807	-0.103717	-0.083875	0.125035	-0.253982	-0.127812	0.107506	-0.148399	0.076706	-0.0884779	0.194444	0.0394885	0.105063	-0.189868	-0.0871739	0.0655702	0.817232	0.156635	0.377394	-0.416234	cyan	-0.0660301	protein_coding
PPP1R12B	69.3648	4.85089	64.5139	-59.663	-0.291495	0.306829	0.0868182	-0.319043	-0.472563	-0.297115	-0.243203	-0.333029	-0.27339	-0.327983	-0.514111	-0.548151	-0.775998	0.631028	0.0773345	-0.00173324	0.634114	0.179949	0.343949	lightgreen	-0.486452	protein_coding
FAM20A	108.921	11.2455	97.6757	-86.4303	0.334216	-0.318737	0.00260491	0.280861	0.242008	0.456823	0.121686	0.193603	0.311628	0.78616	0.658794	0.748278	0.683283	-0.301478	-0.460701	-0.0267073	-0.590424	-0.183943	-0.288912	purple	0.609854	protein_coding
COL12A1	111.401	17.1286	94.2727	-77.1441	0.651627	0.527887	0.784172	0.0506961	0.427625	-0.300909	-0.389121	0.139001	0.292227	0.192155	-0.0260675	0.419202	0.130172	-0.41912	-0.475998	0.579176	0.186273	0.472567	-0.589812	magenta	-0.244071	protein_coding
KCNT2	108.294	42.6888	65.6055	-22.9168	-0.0950578	-0.648381	-0.607494	0.181555	-0.00786987	0.678766	0.505602	0.133682	-0.0561749	0.4203	0.698201	0.369814	0.663725	-0.221502	0.000366226	-0.152124	-0.782222	-0.56647	0.00566586	brown	0.662322	protein_coding
DACT3	170.691	75.4371	95.2541	-19.817	-0.312876	0.3504	0.0899495	-0.489671	-0.325132	-0.52587	-0.261852	-0.719325	-0.524103	-0.443263	-0.668132	-0.69772	-0.719316	0.364834	0.4002	0.0740741	0.896418	0.393834	-0.0461127	brown	-0.430666	protein_coding
PECAM1	75.703	40.5686	35.1344	5.43415	0.182203	-0.313698	0.161892	-0.0551965	0.257581	0.137147	-0.3089	0.389928	0.419528	0.509139	0.541011	0.76206	0.441368	-0.381776	-0.224741	0.412338	-0.362013	0.263707	-0.588714	green	0.439918	protein_coding
RBM4	203.854	101.967	101.887	0.0797447	0.778433	0.726766	0.638478	0.153426	0.385208	-0.202374	0.00245061	0.00962514	0.294159	0.0819924	-0.206888	0.163214	0.0827943	-0.140729	-0.70884	-0.255914	0.135202	-0.00736717	-0.0686255	blue	-0.345307	protein_coding
LTBP1	59.1876	27.8829	31.3046	-3.42172	0.0881763	0.457376	0.432449	-0.323897	0.196167	-0.450734	-0.225856	-0.489293	-0.169707	-0.125237	-0.565562	-0.278728	-0.352454	-0.207095	0.178186	0.324879	0.732469	0.61223	-0.542764	brown	-0.338294	protein_coding
MLLT11	19.5551	4.00809	15.547	-11.5389	0.101969	0.447625	0.321813	-0.0928659	-0.100935	-0.310594	-0.3168	0.027701	0.248278	-0.41685	-0.275305	-0.134983	-0.390299	0.196812	-0.111672	-0.0836438	0.362601	0.213906	0.222846	brown	-0.300364	protein_coding
SLC47A1	9.07277	1.61383	7.45895	-5.84512	-0.0290004	0.0163912	-0.0914442	-0.444398	-0.337077	-0.0759317	-0.219466	-0.00406755	-0.0255454	-0.476619	0.137256	0.128301	-0.091835	0.16663	-0.0947782	-0.165193	0.10202	-0.0180736	-0.011287	purple	0.0796625	protein_coding
GAP43	40.957	12.1391	28.8179	-16.6788	0.326427	0.142578	0.301503	0.195235	-0.0387703	0.037307	-0.344182	0.343706	0.520287	0.219028	0.288775	0.510074	0.161574	0.0352167	-0.432477	0.11685	-0.117827	-0.0897442	0.0978047	green	0.132388	protein_coding
MSR1	85.4481	53.0719	32.3761	20.6958	0.0806376	-0.409523	-0.287689	0.115937	-0.0950401	0.345617	-0.0448371	0.271042	0.139699	0.162145	0.815677	0.559832	0.539468	-0.0628235	-0.175523	-0.1475	-0.623498	-0.447781	0.0795295	red	0.566768	protein_coding
DUSP6	57.688	20.0205	37.6675	-17.6471	0.333183	-0.154383	0.0925745	0.096757	0.224479	0.300565	0.0135374	0.483679	0.314218	0.254912	0.47963	0.668077	0.461478	-0.317144	-0.443349	0.186936	-0.505677	-0.0551103	-0.345538	green	0.208471	protein_coding
PM20D2	105	31.1324	73.8678	-42.7354	0.610822	0.835561	0.465752	-0.0286601	0.231054	-0.200041	0.203349	-0.364071	0.026053	-0.283943	-0.490097	-0.188985	-0.128556	-0.100257	-0.467815	-0.231749	0.392064	-0.0308537	-0.0284277	black	-0.522366	protein_coding
NINJ2	235.361	70.8433	164.518	-93.6747	0.719317	0.186214	0.476372	0.389042	0.457184	0.201117	-0.0735297	0.524812	0.733792	0.500007	0.421406	0.810122	0.584	-0.439292	-0.704809	0.201469	-0.449776	-0.056851	-0.270935	blue	0.163639	protein_coding
FYN	189.497	49.411	140.086	-90.6751	0.605632	0.0540847	0.211382	0.334386	0.355025	0.388065	0.132657	0.693312	0.760256	0.273598	0.46012	0.782522	0.579942	-0.365852	-0.662782	0.0250469	-0.657716	-0.352966	-0.0353811	green	0.127722	protein_coding
ID4	45.0204	21.5918	23.4286	-1.83686	-0.0677637	0.295838	0.427056	-0.264079	-0.212569	-0.361561	-0.423935	-0.132379	-0.253764	-0.123062	-0.371252	-0.201382	-0.524174	0.170111	0.0445966	0.651976	0.629328	0.593942	-0.28791	brown	-0.379094	protein_coding
ABCG2	100.381	31.1993	69.1816	-37.9823	0.485063	-0.0936456	0.258164	0.314181	0.436817	0.307457	0.0757843	0.515063	0.419505	0.487362	0.447067	0.742576	0.601912	-0.481748	-0.533632	0.141221	-0.53223	-0.00749793	-0.360341	green	0.263006	protein_coding
GALNT12	93.7444	35.3523	58.3921	-23.0398	0.58579	0.26576	0.443803	0.427039	0.387436	0.0213962	-0.109853	0.329358	0.757254	0.48618	0.217214	0.495431	0.334818	-0.181932	-0.574555	-0.0427275	-0.292096	-0.0987692	0.0425784	blue	0.0486172	protein_coding
ITIH3	7.97722	1.71934	6.25788	-4.53854	-0.0857693	0.00678789	0.025589	-0.212505	0.0432718	-0.275711	-0.22575	-0.0799511	-0.254442	-0.254547	-0.165385	-0.0782258	-0.0313499	-0.1084	0.218209	0.171525	0.212497	0.182288	-0.258209	grey	-0.101141	protein_coding
RABGGTB	317.43	195.488	121.942	73.5456	0.914475	0.62055	0.486642	0.41187	0.577201	0.121615	0.317501	0.191822	0.522714	0.139032	0.0132704	0.385573	0.465836	-0.482224	-0.724081	-0.146872	-0.264196	-0.300802	-0.0605257	blue	-0.194979	protein_coding
NIPSNAP3B	199.555	55.3352	144.22	-88.8847	0.716557	0.938378	0.793405	0.149271	0.427478	-0.438565	-0.13692	-0.0452493	0.294579	-0.187356	-0.540889	-0.047621	-0.156961	-0.165217	-0.531056	-0.0566097	0.41027	0.180743	-0.0464111	black	-0.624344	protein_coding
NABP1	101.608	6.63672	94.9716	-88.3349	0.49554	-0.162481	0.132773	0.318248	0.429261	0.326777	0.112116	0.181068	0.220706	0.691205	0.595784	0.712037	0.742087	-0.507018	-0.441173	0.0853338	-0.55551	-0.145607	-0.455789	purple	0.468491	protein_coding
LDLRAD3	153.458	56.9085	96.5495	-39.641	0.400507	-0.258248	0.0188084	0.164908	0.267635	0.424902	0.083471	0.581641	0.341562	0.282715	0.681302	0.839959	0.716981	-0.501778	-0.434616	0.248767	-0.690681	-0.198038	-0.39544	green	0.396631	protein_coding
BEX5	73.2451	12.3796	60.8654	-48.4858	0.520276	0.694939	0.681848	0.514823	0.531285	-0.351053	-0.0043892	-0.0143501	0.190044	0.0429504	-0.516727	-0.135833	-0.0601838	-0.218514	-0.296035	-0.0560966	0.272139	0.214574	0.0195232	magenta	-0.493757	protein_coding
MYEF2	99.3798	23.0271	76.3528	-53.3257	0.275648	0.769982	0.245617	-0.247798	-0.079357	-0.112901	0.296593	-0.43229	-0.0123666	-0.447864	-0.702254	-0.487102	-0.497876	0.158649	-0.234407	-0.188477	0.572177	-0.0708047	0.207519	brown	-0.645484	protein_coding
FBN1	103.359	5.13474	98.2239	-93.0892	0.564159	0.265543	0.399754	0.251059	0.31455	0.129167	-0.0233532	0.250682	0.752381	0.460245	0.105341	0.571268	0.332162	-0.171061	-0.658909	-0.0718708	-0.216379	-0.12514	-0.0550463	grey60	0.0911622	protein_coding
ATRNL1	41.3066	14.4882	26.8184	-12.3301	0.354596	0.694992	0.454932	-0.0249332	0.06989	-0.267407	-0.142391	-0.264397	0.234488	-0.312474	-0.393943	-0.127599	-0.252732	-0.0467009	-0.206181	0.112136	0.439805	0.164842	0.0364847	black	-0.384459	protein_coding
SLC25A37	18.1081	6.26766	11.8405	-5.5728	0.0759423	0.00444155	-0.270056	0.00968938	0.0225133	0.337047	0.594601	-0.0471706	-0.19257	-0.293919	0.0731304	-0.155917	0.149891	-0.286699	0.0719312	0.12562	-0.233052	-0.238117	-0.0356623	pink	-0.0934838	protein_coding
PYGM	132.237	60.8149	71.4216	-10.6068	-0.250658	0.365853	0.314778	-0.462908	-0.20331	-0.708796	-0.583284	-0.51443	-0.247005	-0.325889	-0.628852	-0.527362	-0.778643	0.43705	0.286727	0.0568839	0.874297	0.573001	-0.0403557	brown	-0.463149	protein_coding
MITD1	313.725	158.66	155.065	3.5943	0.868926	0.430801	0.60435	0.456532	0.630683	0.0705375	0.0967582	0.310556	0.519286	0.492586	0.132117	0.574323	0.530334	-0.478834	-0.76925	-0.0207099	-0.292571	-0.111459	-0.236327	blue	-0.0375607	protein_coding
GAS1	156.232	8.24215	147.99	-139.748	0.582803	0.0193166	0.185423	0.279903	0.369408	0.348379	0.0368331	0.436293	0.841659	0.467901	0.540568	0.815186	0.644313	-0.418646	-0.565982	0.0393289	-0.571803	-0.270785	-0.138677	grey60	0.340689	protein_coding
EFCAB7	202.708	107.877	94.8309	13.0463	0.809906	0.332311	0.533478	0.470978	0.687854	0.108139	0.124161	0.407251	0.514028	0.483114	0.181559	0.582718	0.560892	-0.558183	-0.612514	0.0199902	-0.340924	-0.0802117	-0.301408	blue	-0.0270729	protein_coding
SLC19A2	29.9695	10.8969	19.0726	-8.17574	0.337852	0.299266	-0.0863048	-0.218453	0.0175631	0.254822	0.335586	0.123625	0.306603	-0.429658	0.0130399	0.13751	0.0826921	-0.11998	-0.356744	-0.167983	-0.199202	-0.40264	0.0982642	blue	-0.257428	protein_coding
DCN	107.242	11.4526	95.7891	-84.3365	0.543835	0.0643748	0.0869348	0.326345	0.448989	0.346821	0.208775	0.461436	0.889307	0.358766	0.387296	0.625402	0.606532	-0.444867	-0.455668	-0.148638	-0.598656	-0.400092	0.029299	grey60	0.24204	protein_coding
CCM2L	158.101	84.5924	73.509	11.0834	0.327886	-0.31511	0.0682352	0.0777139	0.170197	0.381067	-0.126128	0.474092	0.459641	0.551979	0.696321	0.927471	0.639409	-0.315192	-0.472149	0.180183	-0.550966	-0.107421	-0.371994	green	0.530788	protein_coding
ENPP4	111.067	23.3848	87.682	-64.2972	0.711113	0.763084	0.594729	0.0854596	0.581909	-0.223929	0.138771	0.0467506	0.360322	-0.194839	-0.388431	0.0101386	0.0374526	-0.435746	-0.400206	0.033995	0.149337	0.0935052	-0.180806	black	-0.570167	protein_coding
PIM3	120.913	51.0693	69.8441	-18.7748	0.377072	-0.274753	0.0225514	0.0749036	0.239231	0.359832	0.00051436	0.187242	0.235017	0.489053	0.703737	0.828043	0.743265	-0.516639	-0.338662	0.214603	-0.492497	-0.107411	-0.542613	green	0.609529	protein_coding
DDIT3	8.8632	2.15618	6.70702	-4.55084	0.0327083	-0.200234	-0.020512	0.31212	0.0852067	0.0602876	0.0756828	-0.0897783	-0.0897576	0.455438	0.18622	0.075419	0.27475	-0.0802738	0.0220263	0.116009	-0.176798	-0.0987154	-0.0402625	grey	0.260381	protein_coding
RAB11FIP1	78.8061	24.6584	54.1477	-29.4893	0.288439	-0.290649	-0.160048	0.197499	0.181135	0.425685	0.166723	0.0924242	0.0996307	0.424591	0.694542	0.614795	0.715705	-0.408825	-0.276982	0.112952	-0.593512	-0.340945	-0.294262	red	0.520785	protein_coding
FBLN1	55.4148	4.69716	50.7176	-46.0205	0.437017	0.0622704	0.202803	0.114643	0.312588	0.147566	-0.125956	0.308726	0.719769	0.247731	0.377042	0.649274	0.48197	-0.436803	-0.325368	0.2861	-0.362024	-0.0993492	-0.219521	grey60	0.231539	protein_coding
CDKN3	51.1745	4.70936	46.4652	-41.7558	0.103206	-0.420691	-0.136939	0.0692153	0.0560094	0.217031	-0.0997159	-0.115309	-0.0162793	0.599918	0.627777	0.589865	0.595612	-0.117815	-0.221995	-0.166931	-0.408093	-0.179947	-0.270793	purple	0.723756	protein_coding
SYNM	157.589	62.7194	94.87	-32.1505	-0.0769072	0.542714	0.343699	-0.081874	0.108689	-0.65736	-0.202916	-0.401835	-0.29222	-0.412432	-0.851688	-0.720051	-0.601617	0.103421	0.359928	0.0865125	0.780604	0.425845	0.00969061	red	-0.676666	protein_coding
SH3BGRL2	50.7559	17.3599	33.396	-16.036	0.35393	-0.0716664	0.0645731	-0.0549481	0.351546	0.20808	0.047099	0.0331701	0.201917	0.0902451	0.402051	0.615738	0.553266	-0.616591	-0.20304	0.253412	-0.317969	0.0367912	-0.619196	green	0.279354	protein_coding
TMED2	50.3215	9.66359	40.6579	-30.9943	0.298722	0.360384	0.668852	0.103285	0.408931	-0.430303	-0.368557	0.0767769	-0.0488244	0.0400086	-0.22562	0.0419243	-0.0755217	-0.457023	0.043126	0.885341	0.337969	0.693893	-0.628001	cyan	-0.365186	protein_coding
JAK2	60.5832	14.5921	45.9911	-31.399	0.174721	0.620203	0.265896	-0.303482	-0.0134951	-0.293251	0.166961	-0.357383	-0.342384	-0.475126	-0.643	-0.573419	-0.505953	0.0866842	-0.0312893	0.0211135	0.578181	0.140152	-0.000623983	brown	-0.695034	protein_coding
COL18A1	155.682	62.2307	93.4517	-31.221	-0.334465	0.373539	0.153949	-0.516477	-0.359458	-0.482671	-0.282478	-0.483424	-0.415645	-0.558099	-0.69549	-0.69313	-0.8615	0.407135	0.317793	0.173924	0.864683	0.527443	-0.0184302	brown	-0.573228	protein_coding
USP9Y	12.8979	5.44754	7.45033	-2.00279	0.0810626	-0.112189	0.226081	0.320254	0.250452	-0.141613	-0.228471	0.215661	0.142871	0.595884	0.0647423	0.1877	0.195632	-0.0226716	-0.137825	0.0142825	-0.130415	0.12028	-0.0430177	purple	0.170441	protein_coding
DCBLD2	317.272	240.037	77.2355	162.801	-0.667796	-0.480885	-0.431025	-0.00466263	-0.0339458	-0.159738	-0.048088	-0.348436	-0.48844	-0.118274	-0.0483852	-0.44629	-0.0933106	-0.0695275	0.90411	0.126895	0.100041	0.231391	-0.0990297	turquoise	0.201743	protein_coding
RBP7	29.3858	10.9429	18.443	-7.50013	0.405465	0.275661	0.482298	0.511513	0.392974	-0.0371764	-0.153351	0.113352	0.458409	0.514621	0.0402268	0.316674	0.24424	-0.254452	-0.327279	0.10073	-0.0593505	0.126634	-0.0434434	blue	0.101792	protein_coding
SOD3	119.969	39.0207	80.9487	-41.9281	-0.501246	-0.0347246	0.0625073	-0.598752	-0.443847	-0.505301	-0.579645	-0.467582	-0.553097	-0.20263	-0.27214	-0.436365	-0.678096	0.400255	0.465543	0.415055	0.73096	0.643539	-0.269382	brown	-0.173663	protein_coding
ABCA8	80.4635	10.8189	69.6446	-58.8257	0.487617	0.0458433	0.0844888	0.274659	0.434662	0.331899	0.187067	0.470922	0.882508	0.354026	0.324312	0.604262	0.546998	-0.443711	-0.402874	-0.0405914	-0.550047	-0.356428	-0.0146034	grey60	0.184655	protein_coding
PIR	76.2666	38.1463	38.1203	0.0259499	0.627814	0.560444	0.546449	0.333271	0.612017	-0.0651395	0.291679	0.417472	0.455059	-0.036724	-0.406321	0.0910746	0.115282	-0.420814	-0.441187	-0.0201822	-0.0340872	0.0539652	-0.0895001	blue	-0.530541	protein_coding
PPIL4	315.596	141.336	174.26	-32.9236	0.841396	0.565652	0.604445	0.229586	0.387703	0.0978886	0.0869418	0.291245	0.444171	0.189671	0.0640737	0.488049	0.287946	-0.340564	-0.817594	0.201574	-0.163426	-0.0799667	-0.228389	turquoise	-0.25649	protein_coding
GOLGA4	47.24	24.7167	22.5233	2.1934	0.275948	0.0411205	-0.181243	0.447748	0.274075	0.514478	0.841985	0.0305762	-0.118615	0.0960262	0.0249039	-0.0436911	0.413057	-0.365248	-0.17565	-0.144234	-0.412718	-0.490271	0.10181	pink	-0.0272534	protein_coding
PLCB4	72.1412	18.4129	53.7283	-35.3154	0.454493	0.753388	0.6093	-0.261937	0.176494	-0.350009	-0.174566	0.101801	0.306722	-0.349752	-0.589919	-0.0730424	-0.388005	-0.0368907	-0.394657	0.117316	0.49515	0.280889	-0.10813	black	-0.698467	protein_coding
F8	72.7564	42.8722	29.8842	12.988	0.248668	-0.28523	0.0802267	0.149378	0.292411	0.25833	-0.103104	0.370998	0.372373	0.556201	0.480226	0.772523	0.598283	-0.375796	-0.330211	0.107602	-0.453889	-0.0237548	-0.415475	green	0.497741	protein_coding
PIAS1	60.1498	21.9718	38.1781	-16.2063	0.00833109	-0.238498	-0.62204	-0.0910603	-0.151539	0.739583	0.817915	-0.038174	-0.0587267	-0.121544	0.264123	0.112423	0.374602	-0.142761	-0.137283	-0.327946	-0.499346	-0.711503	0.156093	pink	0.263457	protein_coding
INSIG1	80.6407	27.2136	53.4271	-26.2135	0.584033	0.29556	0.276534	0.137085	0.14242	0.336925	0.171112	0.315701	0.280339	-0.0298784	0.202168	0.571189	0.365	-0.359638	-0.584003	0.287191	-0.223844	-0.222374	-0.21809	blue	-0.0512631	protein_coding
FHL5	61.8002	17.6317	44.1685	-26.5368	0.268293	0.675792	0.536553	-0.169076	0.177565	-0.518208	-0.293056	-0.188202	-0.0239493	-0.379107	-0.642227	-0.243729	-0.396828	0.016233	-0.129309	0.0193528	0.618736	0.310028	-0.0904908	brown	-0.623536	protein_coding
INSM1	48.4906	15.9812	32.5094	-16.5281	0.127474	-0.259668	-0.0699789	0.442456	0.236737	0.374336	0.221266	0.910164	0.411728	0.178927	0.364234	0.359124	0.367548	-0.221393	-0.175241	0.079419	-0.674498	-0.264413	0.185953	greenyellow	0.0431957	protein_coding
ABCA9	49.55	19.2549	30.2951	-11.0402	0.0880137	-0.415679	-0.243446	0.300905	0.261392	0.59508	0.443118	0.432024	0.461153	0.620552	0.421303	0.441617	0.554255	-0.361879	-0.158628	0.00031325	-0.672209	-0.29795	-0.0449764	brown	0.4714	protein_coding
ANKRD29	106.851	50.798	56.0527	-5.25476	0.45773	-0.0528853	0.253324	0.148211	0.26357	0.194251	-0.192542	0.494267	0.630068	0.408343	0.493364	0.836097	0.545649	-0.338824	-0.514406	0.0781006	-0.408978	-0.0852658	-0.256539	green	0.384711	protein_coding
FZD6	182.731	92.9637	89.7671	3.19666	0.675226	0.383248	0.454252	-0.183497	0.115355	0.134586	-0.0997268	0.194461	0.358636	0.0990927	0.242446	0.634322	0.232827	-0.261779	-0.739793	0.359896	-0.0529309	0.0440484	-0.466754	turquoise	-0.0817326	protein_coding
RHOJ	86.9769	34.9946	51.9823	-16.9877	0.458045	0.0716634	0.455487	0.0431262	0.317198	0.111268	-0.284875	0.362957	0.531197	0.580785	0.312823	0.745215	0.344779	-0.34304	-0.50485	0.364262	-0.180677	0.193007	-0.465617	green	0.233521	protein_coding
LILRB2	87.3752	42.817	44.5582	-1.74121	0.150655	-0.33335	-0.178143	0.0378445	-0.131137	0.501906	-0.00619318	0.38704	0.332157	0.312427	0.777618	0.655606	0.439239	-0.0484248	-0.358815	0.040414	-0.596061	-0.355227	0.0326637	red	0.503683	protein_coding
PDK1	13.1638	3.01353	10.1502	-7.13671	-0.0724118	-0.142666	-0.199121	0.444856	0.081549	0.129562	0.414409	-0.215702	-0.455645	0.159723	-0.0285579	-0.250684	0.215011	-0.0438992	0.156726	-0.147954	-0.17981	-0.289002	0.156516	grey	0.0653789	protein_coding
ENAH	87.7884	33.4467	54.3417	-20.895	-0.0410465	0.588111	0.25441	-0.381588	-0.172734	-0.38615	-0.167672	-0.263094	0.00476136	-0.538796	-0.723222	-0.496837	-0.675564	0.270582	0.0568247	-0.0694578	0.734237	0.278511	0.146047	brown	-0.58305	protein_coding
PRELP	53.3343	12.7073	40.627	-27.9197	-0.355238	0.04271	-0.170519	-0.509945	-0.167984	-0.311005	-0.0279981	-0.332311	-0.308206	-0.451007	-0.409521	-0.548726	-0.433512	0.100178	0.469949	-0.0509705	0.456705	0.289028	-0.0923249	green	-0.198851	protein_coding
MAP3K8	97.2444	8.87503	88.3694	-79.4943	0.245899	-0.277606	-0.299118	0.128618	-0.0214653	0.855953	0.494375	0.292497	0.345087	0.354994	0.620408	0.67171	0.578097	-0.262929	-0.455378	-0.0413457	-0.684158	-0.550455	-0.0271084	lightcyan	0.501445	protein_coding
MSMO1	43.2765	19.1611	24.1154	-4.95428	0.471069	0.289517	0.145063	0.0764948	0.0211807	0.399775	0.375116	0.122846	0.000135873	-0.11001	0.0856062	0.320209	0.229819	-0.228255	-0.528744	0.183754	-0.133747	-0.271701	-0.150263	turquoise	-0.183447	protein_coding
NCF4	179.848	103.747	76.101	27.6461	0.080022	-0.576805	-0.325019	0.225438	0.0742455	0.551222	0.125351	0.258332	0.218076	0.529454	0.939253	0.669894	0.698264	-0.312298	-0.120635	0.0546671	-0.756122	-0.330603	-0.158898	red	0.738551	protein_coding
CD248	36.7017	3.65465	33.0471	-29.3924	0.40235	0.105838	0.229001	0.245098	0.272831	0.290537	0.12374	0.245612	0.708528	0.471082	0.191136	0.484551	0.302037	-0.257558	-0.453423	0.0671024	-0.269733	-0.0646141	-0.105227	grey60	0.150273	protein_coding
PAIP1	259.453	108.296	151.157	-42.8606	0.79094	0.734029	0.694038	0.216477	0.332684	-0.0106972	0.0132169	0.124333	0.397928	0.0988943	-0.157721	0.309828	0.0810287	-0.20556	-0.77495	0.0607002	0.103367	0.0295348	-0.0983934	blue	-0.344231	protein_coding
ZSWIM8	272.128	216.408	55.7199	160.688	-0.586692	-0.429767	-0.41542	0.0428937	0.0404114	-0.125113	0.0799694	-0.316687	-0.519778	-0.158384	-0.0768523	-0.472429	-0.04538	-0.172318	0.876667	0.148416	0.0502773	0.181944	-0.111126	turquoise	0.144562	protein_coding
PCOLCE2	31.2005	18.6751	12.5254	6.14972	0.522505	0.481093	0.192814	0.124759	0.215542	0.137726	0.353068	0.149343	0.467703	-0.222042	-0.131048	0.0828972	0.136059	-0.296977	-0.342626	-0.0156911	-0.0579991	-0.266918	0.0590186	blue	-0.2938	protein_coding
PLVAP	61.8449	19.8025	42.0423	-22.2398	-0.234147	-0.599414	-0.235312	-0.273049	-0.158234	0.275496	-0.272455	0.213958	0.0854179	0.295467	0.610648	0.588889	0.283667	-0.148226	0.0901741	0.476277	-0.303391	0.169983	-0.477848	green	0.537831	protein_coding
ZFAND1	156.207	27.5686	128.639	-101.07	0.692419	0.772004	0.881352	0.274716	0.533444	-0.402728	-0.184748	0.0362634	0.207175	0.158801	-0.412158	0.0347976	-0.0658146	-0.269449	-0.472325	0.159844	0.356897	0.382339	-0.240001	magenta	-0.48807	protein_coding
ZNF776	362.169	158.758	203.411	-44.6531	0.833287	0.352347	0.459118	0.164188	0.408917	0.365882	0.211811	0.371736	0.565215	0.374337	0.304102	0.734219	0.50384	-0.509686	-0.844984	0.221259	-0.3663	-0.134732	-0.378472	turquoise	0.0313082	protein_coding
ANO1	124.252	65.943	58.3088	7.63414	-0.0536153	0.555154	0.438593	-0.310556	-0.242215	-0.527893	-0.391849	-0.446797	-0.31349	-0.362581	-0.650911	-0.475544	-0.716832	0.335582	0.0618389	0.263301	0.870036	0.508633	-0.0626267	brown	-0.555075	protein_coding
SLC26A4	72.1579	44.3966	27.7612	16.6354	0.625691	0.388869	0.621446	0.457456	0.480299	-0.237167	-0.185666	0.310505	0.477407	0.321059	-0.0020851	0.33289	0.307204	-0.299523	-0.436581	0.131309	-0.0905709	0.0757373	-0.0890699	blue	-0.0923047	protein_coding
ARHGEF3	213.032	76.75	136.282	-59.5318	0.423691	-0.315224	-0.0499579	0.287563	0.267641	0.570903	0.211413	0.534685	0.41188	0.499032	0.735447	0.897781	0.832249	-0.475418	-0.506749	0.0586662	-0.763451	-0.349859	-0.297606	green	0.563	protein_coding
TMEM123	142.796	65.086	77.7097	-12.6238	0.692837	0.347065	0.181768	0.00660738	0.141182	0.345662	0.256534	0.211891	0.392525	0.0189077	0.320566	0.526778	0.425888	-0.320218	-0.665482	0.0663949	-0.318052	-0.386675	-0.135764	blue	0.0258138	protein_coding
NPR1	229.609	73.433	156.176	-82.743	-0.341148	0.378671	0.20841	-0.41061	-0.179238	-0.709942	-0.347021	-0.473321	-0.365369	-0.523778	-0.828121	-0.788845	-0.840205	0.401741	0.414118	-0.0631114	0.882272	0.554706	0.0449739	brown	-0.606909	protein_coding
RASSF3	116.284	38.2391	78.0451	-39.806	-0.0798538	0.553661	0.164465	-0.212012	-0.162923	-0.498479	-0.120434	-0.495862	-0.211459	-0.485334	-0.745625	-0.702775	-0.625675	0.362172	0.182384	-0.229793	0.724186	0.10475	0.303958	brown	-0.564792	protein_coding
TM2D3	262.949	144.556	118.393	26.1636	0.85996	0.493196	0.484829	0.1431	0.509334	0.120819	0.0521504	0.141169	0.607356	0.189851	0.183751	0.673323	0.524175	-0.592232	-0.678259	0.0688964	-0.181928	-0.111023	-0.398046	blue	0.0268377	protein_coding
ITGA3	149.601	59.2893	90.312	-31.0227	-0.430784	0.127536	0.109982	-0.504429	-0.335192	-0.627278	-0.462843	-0.577429	-0.723143	-0.420923	-0.516689	-0.615526	-0.660741	0.324456	0.49231	0.257348	0.830185	0.627993	-0.24589	brown	-0.307504	protein_coding
HTR2A	10.042	3.17782	6.8642	-3.68638	0.0336301	0.196695	-0.134909	-0.295625	-0.354163	0.278864	0.181327	-0.326997	0.0150311	-0.210556	-0.0824565	0.0275919	-0.195107	0.260582	-0.311388	-0.248433	0.165739	-0.269916	0.136697	turquoise	-0.0948497	protein_coding
CTBP1	10.0294	2.29872	7.73073	-5.432	-0.167486	-0.212631	0.000862045	-0.265378	-0.172367	-0.0248017	-0.136372	0.220566	-0.267807	-0.146371	0.0763297	0.0668273	-0.0978831	-0.085306	0.151877	0.686918	0.0763722	0.333151	-0.423083	cyan	-0.102441	protein_coding
PSMB8	136.338	52.6579	83.6804	-31.0225	0.411585	-0.220139	0.267059	0.481342	0.450704	0.251712	-0.121225	0.408745	0.417724	0.663111	0.625863	0.838122	0.746176	-0.549926	-0.374485	0.320735	-0.56682	0.053155	-0.426171	green	0.530761	protein_coding
SLC20A1	110.535	27.2451	83.2897	-56.0445	0.432512	-0.109683	-0.119644	0.234033	0.100962	0.619675	0.396692	0.430209	0.425286	0.0997646	0.578529	0.680031	0.654314	-0.37054	-0.514229	-0.0508876	-0.665385	-0.509934	-0.038482	green	0.35723	protein_coding
PPIP5K2	339.726	178.104	161.622	16.4816	0.889876	0.699411	0.49448	0.163406	0.430527	0.190929	0.34875	0.142569	0.505376	0.0694128	-0.1064	0.359627	0.281966	-0.379607	-0.794807	-0.0932051	-0.102335	-0.256845	-0.106317	blue	-0.30599	protein_coding
FOSL2	12.4412	2.42959	10.0116	-7.58199	0.0243744	-0.00786587	-0.11095	-0.419863	-0.324591	0.288485	-0.0340338	-0.0286155	-0.0450373	-0.181432	0.244657	0.28375	-0.0571435	0.0146739	-0.177502	0.422993	0.00649924	-0.0495176	-0.234767	green	-0.0357895	protein_coding
IGFBP2	58.9858	10.7208	48.265	-37.5442	-0.453007	-0.0949971	-0.0319869	-0.257307	-0.350933	-0.362343	-0.349529	-0.253117	-0.682364	-0.420311	-0.158072	-0.422089	-0.438262	0.190696	0.510677	0.489932	0.447226	0.485336	-0.19918	brown	-0.189906	protein_coding
TCF15	330.623	249.711	80.9125	168.798	-0.673928	-0.461094	-0.439176	-0.0520055	-0.108987	-0.208234	-0.0807536	-0.37355	-0.573127	-0.205626	-0.045573	-0.488259	-0.125467	-0.0117257	0.911866	0.161466	0.122058	0.206753	-0.0478396	turquoise	0.189618	protein_coding
PALLD	159.181	54.7548	104.426	-49.6715	-0.188575	0.504028	0.378744	-0.30843	-0.11856	-0.609795	-0.351129	-0.242354	-0.251683	-0.501805	-0.815474	-0.664067	-0.848359	0.329523	0.245278	0.206728	0.829152	0.542056	0.052992	red	-0.772977	protein_coding
ACTN4	16.6057	2.07011	14.5356	-12.4655	-0.0957759	-0.247306	-0.395037	0.0521898	-0.10757	0.525566	0.577323	-0.105616	-0.275991	-0.061608	0.130702	0.0583752	0.236085	-0.118054	-0.012734	-0.104296	-0.261413	-0.317526	-0.0512911	grey	0.177994	protein_coding
ERAP1	120.677	52.9071	67.7698	-14.8627	0.585543	0.192244	0.202625	0.158327	0.152566	0.472714	0.262316	0.217356	0.522565	0.352298	0.343901	0.600968	0.396521	-0.253758	-0.677067	0.146975	-0.379492	-0.334031	-0.0816321	turquoise	0.115706	protein_coding
NPNT	191.315	83.514	107.801	-24.2869	0.0842377	0.747178	0.473423	-0.364194	-0.0381946	-0.598768	-0.259965	-0.473886	-0.12711	-0.43462	-0.828787	-0.595512	-0.73985	0.227001	0.0460164	0.0736829	0.893468	0.460654	-0.0317918	brown	-0.72414	protein_coding
AMFR	71.9175	23.8718	48.0457	-24.1739	-0.560569	-0.273955	-0.191581	-0.453572	-0.302888	-0.315741	-0.233358	-0.162372	-0.600798	-0.350527	-0.233675	-0.435523	-0.455914	0.224786	0.571219	0.367066	0.35989	0.436192	-0.227189	blue	-0.200993	protein_coding
CNOT2	62.7348	15.946	46.7888	-30.8428	0.109585	-0.177914	-0.47447	0.161089	-0.0856944	0.812525	0.749682	0.107977	0.269659	0.176199	0.264229	0.272652	0.410786	-0.0344522	-0.372234	-0.463227	-0.591762	-0.7998	0.373634	pink	0.322308	protein_coding
NAMPT	67.3392	15.7462	51.5929	-35.8467	0.201646	-0.285679	-0.299254	0.13615	0.0771861	0.55947	0.254309	0.126949	0.254027	0.264203	0.617498	0.628846	0.627555	-0.269685	-0.295783	-0.155639	-0.62704	-0.525598	-0.0514278	brown	0.505419	protein_coding
FRMD3	45.0413	12.586	32.4553	-19.8693	0.460315	0.0598387	0.123255	0.255539	0.424218	0.420635	0.477586	0.459317	0.290864	0.231059	0.176735	0.401824	0.470305	-0.464371	-0.450422	-0.0782922	-0.468254	-0.222633	-0.140218	turquoise	0.0488166	protein_coding
EML1	319.18	184.327	134.853	49.4732	0.909859	0.662723	0.659682	0.340305	0.602678	0.0241929	0.087	0.380677	0.729928	0.126578	-0.0242773	0.478821	0.341329	-0.506906	-0.715709	0.0872267	-0.174534	-0.0754891	-0.146967	blue	-0.298319	protein_coding
TMEM263	201.994	130.827	71.1671	59.6598	0.837425	0.683303	0.536103	0.186379	0.473541	0.038674	0.130679	0.0841404	0.515418	0.000565142	-0.0718291	0.394064	0.304804	-0.4936	-0.584399	0.0748128	0.00468426	-0.11799	-0.243172	blue	-0.263714	protein_coding
PTPN6	103.228	52.0507	51.1772	0.8735	-0.095714	-0.675409	-0.32984	0.278534	0.0993201	0.423321	0.0681253	0.179242	0.0379668	0.659954	0.811335	0.489195	0.611285	-0.289002	0.102169	0.0850387	-0.634956	-0.164014	-0.221358	red	0.781851	protein_coding
SCRG1	109.849	53.9919	55.8568	-1.86489	0.019974	0.609095	0.396043	-0.166926	-0.132652	-0.563071	-0.353901	-0.536395	-0.184611	-0.320908	-0.675603	-0.481218	-0.596074	0.346634	0.0294946	-0.115725	0.812617	0.301676	0.1188	brown	-0.479712	protein_coding
GLCCI1	229.713	117.116	112.597	4.51868	0.824628	0.42736	0.327414	0.340705	0.548448	0.37608	0.514247	0.213162	0.48492	0.258685	0.0954309	0.474721	0.580329	-0.612878	-0.686786	-0.086634	-0.342422	-0.292795	-0.220665	blue	-0.00282216	protein_coding
ZBTB41	356.751	197.061	159.69	37.3711	0.913141	0.675404	0.475902	0.223779	0.432002	0.184389	0.289503	0.114669	0.476762	0.0524204	0.00948038	0.433846	0.379614	-0.436225	-0.798391	-0.0884291	-0.150198	-0.300043	-0.122811	blue	-0.216727	protein_coding
PCDHB6	152.965	33.4281	119.537	-86.1089	0.693115	0.848867	0.763788	0.173724	0.399443	-0.303301	-0.140372	-0.0986304	0.347579	-0.00348492	-0.421726	0.0695601	-0.0819486	-0.203522	-0.530078	0.0455561	0.352893	0.17576	-0.122993	black	-0.430633	protein_coding
EMB	112.011	31.1034	80.9079	-49.8045	0.336609	-0.279416	-0.109359	0.388614	0.37982	0.469278	0.261137	0.300132	0.549654	0.625678	0.653274	0.631222	0.763381	-0.45673	-0.308533	-0.146666	-0.731455	-0.363107	-0.0776248	brown	0.610822	protein_coding
ITGA1	140.479	35.9086	104.57	-68.6618	0.677552	0.864809	0.52402	-0.146187	0.229333	-0.0901695	0.131391	-0.105774	0.268613	-0.364518	-0.450849	0.0561669	-0.105272	-0.226074	-0.562107	0.00555622	0.331306	-0.0311971	-0.138406	black	-0.537919	protein_coding
OGN	116.577	39.4248	77.1519	-37.7271	0.354623	0.75146	0.631925	-0.285201	-0.061165	-0.492608	-0.39798	-0.29762	0.122901	-0.152645	-0.540661	-0.156801	-0.501999	0.291207	-0.386736	0.0226413	0.693598	0.294088	-0.011907	brown	-0.508277	protein_coding
ALDH6A1	67.864	40.529	27.335	13.1939	0.643709	0.560736	0.405149	0.0328835	0.515872	-0.0436848	0.301706	0.113213	0.27318	0.0181905	-0.317725	0.0726624	0.142278	-0.399247	-0.444789	-0.11389	0.0451864	-0.0620514	-0.233135	blue	-0.413191	protein_coding
JAG1	25.5603	10.4141	15.1462	-4.73217	0.063269	0.345665	0.444951	0.0394269	0.103444	-0.321061	-0.110563	-0.0942386	-0.209165	-0.0361236	-0.559219	-0.276023	-0.347219	-0.0235935	0.0258522	0.450102	0.498726	0.446773	-0.218955	red	-0.448946	protein_coding
TGM2	36.2916	17.0285	19.2631	-2.23461	-0.0105516	0.233909	0.32744	-0.250108	0.111211	-0.606974	-0.413086	-0.462508	-0.42326	-0.0701408	-0.400426	-0.242317	-0.227978	0.0102016	0.153071	0.0125626	0.61738	0.540348	-0.454122	brown	-0.176694	protein_coding
STK38L	68.1508	19.6109	48.5399	-28.929	0.421848	0.73671	0.321324	-0.295291	-0.110281	0.0173569	0.119243	-0.146684	0.230939	-0.37768	-0.396235	-0.0968169	-0.367693	0.0838058	-0.430923	0.0558321	0.421365	-0.0839349	0.0630439	black	-0.566398	protein_coding
CFL2	112.836	35.7029	77.1336	-41.4307	0.447636	0.865713	0.588483	-0.121849	0.255488	-0.463477	-0.0924145	-0.168148	0.0936559	-0.461593	-0.693699	-0.311289	-0.376359	-0.134431	-0.161615	0.0653037	0.643973	0.276136	-0.105663	black	-0.737538	protein_coding
OLFM1	66.6042	37.0008	29.6034	7.39734	0.212284	-0.312686	0.112855	0.0666589	0.184476	0.20747	-0.194126	0.513562	0.285012	0.45046	0.505473	0.744622	0.456285	-0.233847	-0.363953	0.187585	-0.430343	0.054399	-0.409002	green	0.346879	protein_coding
AGTR1	43.989	7.67981	36.3092	-28.6294	0.424024	0.595407	0.605599	-0.0572405	0.376581	-0.432644	-0.260828	0.310243	0.559476	-0.147299	-0.483096	0.00635118	-0.24829	-0.0631354	-0.336838	-0.0588974	0.293602	0.311615	-0.0410352	black	-0.569778	protein_coding
PPP1R17	23.3107	15.1677	8.14303	7.02466	0.132959	-0.126515	0.0635674	0.229147	0.149975	0.20952	0.0456011	0.911532	0.368012	0.0756253	0.212449	0.327681	0.18549	-0.162729	-0.194219	0.171487	-0.406135	-0.0668206	0.0371048	greenyellow	-0.0856014	protein_coding
NSMF	99.425	44.2686	55.1563	-10.8877	-0.138848	0.493186	0.191665	-0.450415	-0.201104	-0.431847	-0.123403	-0.526233	-0.266031	-0.573042	-0.671892	-0.607254	-0.69471	0.221416	0.217388	0.0148358	0.798176	0.445766	-0.0453179	brown	-0.519736	protein_coding
RHOB	57.2115	16.0579	41.1536	-25.0957	-0.264704	0.135922	0.209675	-0.281409	-0.101228	-0.419555	-0.317569	-0.300525	-0.491042	-0.275888	-0.416504	-0.417907	-0.51914	0.0531423	0.438039	0.655549	0.606144	0.624297	-0.360248	brown	-0.431394	protein_coding
GSKIP	321.435	173.413	148.022	25.3915	0.893397	0.611751	0.669444	0.329702	0.494862	0.00739306	0.0641507	0.140527	0.439525	0.31239	0.0250845	0.462346	0.385611	-0.421876	-0.783125	0.0265998	-0.0678002	-0.010761	-0.27149	blue	-0.108709	protein_coding
C16orf89	37.7351	12.4127	25.3224	-12.9097	0.195463	0.00412604	0.395643	0.0256173	0.126167	-0.191948	-0.615375	0.173851	0.448371	0.536653	0.258182	0.512073	0.0949956	0.010201	-0.291491	0.212502	0.0240823	0.306961	-0.27683	green	0.203238	protein_coding
SH3RF3	47.2648	13.165	34.0998	-20.9349	-0.282121	0.0630693	-0.106187	-0.306221	-0.172149	-0.360005	-0.0291365	-0.692167	-0.643352	-0.290853	-0.410863	-0.523506	-0.32593	0.220701	0.316623	-0.235874	0.507882	0.214732	-0.139598	brown	-0.130536	protein_coding
IBSP	64.8629	37.9337	26.9292	11.0045	-0.107983	-0.496604	-0.33006	-0.0821864	-0.196435	0.396787	-0.0818166	0.406414	0.124273	0.0154553	0.749781	0.510714	0.322727	-0.034501	-0.0389692	0.0903677	-0.55763	-0.252425	0.00744842	red	0.436044	protein_coding
NEGR1	61.1883	14.6342	46.5541	-31.9199	0.357084	0.693494	0.619013	-0.0670108	0.121997	-0.486642	-0.293155	0.133867	0.377662	-0.184004	-0.57882	-0.18098	-0.43278	0.102715	-0.281934	0.0782653	0.530307	0.287384	0.0538231	brown	-0.62069	protein_coding
BTN3A2	79.9822	34.6748	45.3073	-10.6325	0.401126	0.0680968	0.390663	0.0085829	0.146123	-0.017063	-0.474862	0.500563	0.587254	0.235754	0.401086	0.74725	0.270273	-0.148146	-0.508005	0.255521	-0.224194	0.108177	-0.262853	green	0.126941	protein_coding
CGNL1	188.814	72.2423	116.572	-44.3296	0.745947	0.258665	0.441937	0.445603	0.557879	0.214854	0.0674421	0.46236	0.697407	0.406982	0.271563	0.726576	0.584438	-0.492593	-0.673221	0.0709101	-0.425766	-0.174627	-0.188147	blue	0.0261854	protein_coding
CLMP	58.4962	6.11893	52.3772	-46.2583	0.266412	0.634132	0.564051	0.240067	0.254953	-0.495197	-0.0811438	-0.312952	-0.090219	-0.113968	-0.638567	-0.415424	-0.305941	-0.0135658	-0.0579172	-0.0318321	0.541742	0.331208	0.0120994	magenta	-0.4584	protein_coding
HNRNPH1	15.6416	4.02141	11.6202	-7.5988	-0.185678	-0.2505	0.106314	0.0223733	0.145037	-0.169419	-0.222743	0.137624	-0.210123	0.220466	0.0328645	0.0127387	0.0137092	-0.262542	0.336333	0.743115	0.0378728	0.453714	-0.439081	cyan	0.0301481	protein_coding
PKD2	40.4776	7.77775	32.6999	-24.9221	0.236565	0.590657	0.0905479	-0.0826345	-0.00864502	0.189877	0.515924	-0.230762	0.155706	-0.347023	-0.560561	-0.315039	-0.300726	-0.00490476	-0.239052	-0.152406	0.300359	-0.184126	0.191469	black	-0.496258	protein_coding
IL17B	92.9928	23.9289	69.0639	-45.1349	-0.0839121	0.416412	0.475369	0.0505936	0.231501	-0.767789	-0.400591	-0.313552	-0.327195	-0.335531	-0.68878	-0.556667	-0.475654	-0.0230664	0.429358	0.258367	0.696398	0.650082	-0.184471	red	-0.521963	protein_coding
SMAGP	84.9581	43.724	41.2341	2.48981	0.201289	-0.279695	0.108111	0.104168	0.0776392	0.240118	-0.283605	0.505916	0.611245	0.549723	0.583646	0.791056	0.432111	-0.104963	-0.421237	0.0737856	-0.436912	-0.00465914	-0.158211	green	0.487272	protein_coding
CYS1	80.1736	47.7536	32.42	15.3335	0.12044	0.597071	0.478059	-0.399769	-0.0594488	-0.557454	-0.447007	-0.367605	-0.0626439	-0.284013	-0.53836	-0.287012	-0.538241	0.133784	0.00408463	0.121999	0.799364	0.463725	-0.196517	brown	-0.428477	protein_coding
ITGB3BP	26.2769	9.77683	16.5	-6.7232	0.196661	-0.0794222	-0.101067	0.217212	-0.147938	0.429413	0.166497	0.224507	0.230559	0.20457	0.417058	0.358235	0.254003	0.132132	-0.424059	-0.3016	-0.387235	-0.461911	0.349147	turquoise	0.274741	protein_coding
ARID1B	29.6143	8.95321	20.6611	-11.7079	-0.00491522	-0.382306	-0.398808	0.0877282	0.127865	0.627645	0.628425	0.00286257	-0.0151752	0.414539	0.256244	0.262676	0.501601	-0.352574	-0.0574049	-0.113703	-0.437031	-0.328387	-0.219506	pink	0.454448	protein_coding
TBL1X	43.0728	23.3006	19.7722	3.52841	-0.116841	0.360734	0.156786	-0.510238	-0.161366	-0.215027	-0.125982	-0.525872	-0.249617	-0.266483	-0.5119	-0.361351	-0.524517	0.0583147	0.192483	0.324191	0.703286	0.382459	-0.285179	brown	-0.348055	protein_coding
CD69	87.3478	40.0871	47.2607	-7.17356	0.274374	-0.212376	-0.131515	0.502311	0.159361	0.479454	0.280981	0.729789	0.457304	0.197626	0.58439	0.482099	0.540992	-0.2014	-0.345799	-0.172053	-0.787135	-0.511874	0.312947	brown	0.269537	protein_coding
JUND	14.3951	2.73099	11.6642	-8.93316	-0.156848	0.0588109	0.108885	-0.24568	-0.245226	-0.0778874	-0.290811	0.0746516	0.0100317	-0.25363	-0.0270504	-0.0471715	-0.377328	0.0857131	0.150283	0.674461	0.24727	0.344374	-0.132248	cyan	-0.30979	protein_coding
SERPINB9	158.918	8.1502	150.767	-142.617	0.213384	-0.380694	-0.415477	0.133966	-0.112174	0.849861	0.463021	0.353437	0.343291	0.324363	0.793298	0.694549	0.654238	-0.187964	-0.457249	-0.162701	-0.789007	-0.648232	0.0541327	lightcyan	0.608024	protein_coding
RECQL	290.313	157.502	132.811	24.6912	0.878073	0.556565	0.441255	0.327786	0.485374	0.270429	0.323429	0.138792	0.554733	0.219522	0.0869829	0.502451	0.471996	-0.491367	-0.748945	-0.0693418	-0.244336	-0.272378	-0.16689	blue	-0.0611461	protein_coding
ARL5A	80.8108	42.3534	38.4574	3.89607	0.631186	0.734087	0.431305	-0.0430957	0.207171	-0.0683648	0.0810711	0.112441	0.378548	-0.456157	-0.224801	0.0992364	-0.0293044	-0.23787	-0.484065	-0.0406825	0.152409	-0.112183	0.0302382	blue	-0.465829	protein_coding
FZD8	113.932	27.775	86.1565	-58.3815	0.644752	0.17411	0.291255	0.389551	0.368136	0.31117	0.136639	0.365541	0.497185	0.294649	0.355763	0.691181	0.610175	-0.487419	-0.538292	0.136495	-0.40377	-0.262253	-0.1963	green	0.179057	protein_coding
SULF1	20.3908	6.0122	14.3786	-8.3664	0.0737757	-0.184231	-0.00238681	-0.241555	-0.176523	0.0535093	-0.352029	-0.0968999	0.0320511	0.275108	0.490215	0.478183	0.243938	-0.0884997	-0.103517	0.32169	-0.0162257	0.0705051	-0.422421	red	0.460134	protein_coding
MSRB2	60.8175	16.8338	43.9837	-27.1499	0.399644	0.725822	0.323332	-0.304806	0.0131321	-0.0649469	0.141355	-0.269585	0.203889	-0.355718	-0.527251	-0.114355	-0.301654	0.0203231	-0.39505	-0.238804	0.493485	-0.00989358	-0.00263694	black	-0.449058	protein_coding
DOCK8	217.862	101.988	115.873	-13.8852	0.203509	-0.52049	-0.228774	0.241391	0.116639	0.596903	0.150597	0.349799	0.284682	0.615156	0.932423	0.790076	0.752435	-0.32952	-0.322487	0.0184122	-0.793818	-0.341685	-0.204522	red	0.737991	protein_coding
CTSK	131.967	33.6884	98.2788	-64.5904	0.28686	-0.324681	-0.0314772	0.328717	0.233834	0.305999	-0.113642	0.527754	0.609444	0.523156	0.738464	0.767885	0.656511	-0.264431	-0.334497	0.0350653	-0.721036	-0.303947	-0.0444907	brown	0.500092	protein_coding
FOXS1	42.458	19.78	22.6781	-2.89807	0.101899	0.389215	0.530671	-0.0474025	0.0673266	-0.589904	-0.472955	-0.308063	-0.118301	0.00306562	-0.423558	-0.180896	-0.292876	-0.00318641	0.0548167	0.297275	0.651413	0.587831	-0.322655	brown	-0.238596	protein_coding
KCTD20	177.201	82.9911	94.2101	-11.219	0.741468	0.6635	0.711938	-0.134442	0.356226	-0.162447	-0.217546	0.0804625	0.469865	0.0793053	-0.099593	0.425679	0.0722801	-0.349355	-0.634015	0.31245	0.204996	0.272281	-0.483312	blue	-0.258035	protein_coding
ABI3BP	28.5696	12.5882	15.9814	-3.39316	0.115452	-0.133225	-0.311261	0.225653	0.195966	0.584953	0.745421	0.0589545	0.306721	0.320401	0.0347433	0.0821225	0.323358	-0.210957	-0.167385	-0.289292	-0.436433	-0.478147	0.134877	pink	0.135615	protein_coding
PDE2A	109.232	39.3987	69.8334	-30.4347	0.185054	-0.454734	-0.21229	0.0801742	0.255526	0.413661	0.152081	0.26348	0.218102	0.360425	0.663233	0.716825	0.745989	-0.47389	-0.200331	-0.000689181	-0.6463	-0.205549	-0.418147	green	0.578608	protein_coding
SRR	39.7809	5.504	34.2769	-28.7729	0.408636	0.225858	0.605068	0.196726	0.406622	-0.468457	-0.540943	0.211458	0.214404	0.243546	-0.0217882	0.388388	0.209097	-0.174557	-0.335484	-0.00804524	0.0947282	0.353297	-0.329729	magenta	0.0173045	protein_coding
PTP4A3	77.8656	27.3693	50.4963	-23.127	-0.257705	0.136589	0.374891	-0.144259	-0.00208274	-0.67719	-0.56479	-0.404924	-0.435653	0.112097	-0.484362	-0.426889	-0.482648	0.184976	0.363602	0.371791	0.708859	0.723769	-0.325751	brown	-0.252534	protein_coding
KANSL1	26.5849	8.32251	18.2623	-9.93982	-0.0385268	-0.10601	-0.417729	0.170814	-0.134564	0.588936	0.663161	0.00437502	-0.146081	-0.260839	0.174023	-0.079168	0.163798	-0.0850531	-0.0207869	-0.0345774	-0.408424	-0.50681	0.292407	pink	-0.0075192	protein_coding
ITGA8	178.376	82.9215	95.4544	-12.5329	-0.13692	0.537927	0.276184	-0.364613	-0.234046	-0.547295	-0.234925	-0.67384	-0.441631	-0.393387	-0.7633	-0.67771	-0.735593	0.377835	0.183079	-0.0260331	0.909016	0.382737	0.0213775	brown	-0.536016	protein_coding
SMIM10L2B	48.9837	10.3657	38.6181	-28.2524	0.400893	0.640605	0.595568	-0.0140148	0.462824	-0.372398	-0.134108	-0.0830421	0.193188	-0.217806	-0.519219	-0.0612022	-0.163985	-0.411717	-0.0690395	0.182961	0.505203	0.475088	-0.394105	black	-0.468747	protein_coding
TFRC	29.0471	9.65153	19.3956	-9.74408	0.396299	0.172299	0.0385513	0.177005	0.165655	0.283119	0.137629	0.115085	0.231058	-0.218473	0.377224	0.391455	0.404315	-0.405144	-0.230626	0.0531402	-0.312694	-0.280428	-0.0346286	blue	0.12364	protein_coding
PCGF5	30.3552	20.3125	10.0428	10.2697	0.252659	0.0389749	-0.0854522	-0.0124988	-0.221796	0.37781	0.250974	0.182825	0.134931	-0.0171629	0.274096	0.316115	0.163072	0.151472	-0.553618	-0.304345	-0.247658	-0.396651	0.135468	turquoise	0.0934641	protein_coding
TOR1AIP1	132.272	23.5353	108.736	-85.201	0.659642	0.703902	0.834443	0.0127899	0.373395	-0.374395	-0.36347	0.0866736	0.318984	0.0986707	-0.263108	0.228368	-0.0787652	-0.272287	-0.496522	0.486621	0.352217	0.399007	-0.396581	magenta	-0.446087	protein_coding
GPX3	28.8127	5.11776	23.695	-18.5772	0.350602	0.0614989	0.067681	-0.0839248	0.39314	0.0246258	0.0724006	0.234615	0.408429	0.00221363	0.129433	0.375627	0.403449	-0.463727	-0.169592	-0.0865131	-0.241673	-0.078675	-0.308708	green	0.0967827	protein_coding
PRMT3	340.943	197.427	143.515	53.9119	0.919722	0.660027	0.735488	0.248839	0.574216	-0.152198	-0.0814293	0.287855	0.516129	0.153577	-0.00923302	0.465591	0.329759	-0.43669	-0.754985	0.0196245	-0.0696221	0.0586455	-0.285208	blue	-0.240092	protein_coding
CMTM6	190.984	47.2573	143.727	-96.4693	0.712321	0.226083	0.226028	0.118051	0.299349	0.351532	0.104059	0.311035	0.553755	0.148179	0.530617	0.755957	0.595413	-0.494314	-0.618083	0.0939356	-0.437448	-0.288435	-0.259465	green	0.205185	protein_coding
DOC2B	46.5467	20.7924	25.7543	-4.9619	0.163947	-0.336078	-0.0565459	0.0176123	0.243009	0.16673	-0.0558856	0.0811661	0.042461	0.248551	0.548779	0.614297	0.595138	-0.404109	-0.139695	0.0505086	-0.430312	0.00501916	-0.47819	green	0.52223	protein_coding
PYGB	202.915	95.7291	107.186	-11.4571	-0.192215	0.478344	0.436716	-0.374624	-0.131906	-0.783583	-0.544887	-0.454037	-0.350481	-0.406323	-0.763665	-0.624117	-0.798221	0.333616	0.277329	0.189724	0.958002	0.717478	-0.133934	brown	-0.614634	protein_coding
TP53I3	91.1005	6.36352	84.737	-78.3735	0.316359	-0.254652	0.0359666	0.100512	0.16997	0.46199	0.0595416	0.338733	0.549342	0.681253	0.585662	0.762053	0.507029	-0.226103	-0.504975	0.0667913	-0.502884	-0.146555	-0.26662	purple	0.446663	protein_coding
CCL23	92.4698	31.0009	61.469	-30.4681	0.0402031	-0.581992	-0.21316	0.250231	0.244656	0.355565	0.104832	0.370419	-0.0507952	0.383145	0.676763	0.595061	0.686003	-0.437529	-0.0246853	0.176747	-0.673887	-0.101011	-0.395516	brown	0.532931	protein_coding
ARRDC3	99.8539	34.3268	65.527	-31.2002	0.59643	0.0664178	0.242622	0.238292	0.360703	0.309968	0.232595	0.192164	0.209009	0.46777	0.330462	0.608025	0.587504	-0.425748	-0.595914	0.182293	-0.401019	-0.175185	-0.413272	turquoise	0.162904	protein_coding
TM4SF1	112.376	47.2452	65.1312	-17.8859	0.646748	0.267227	0.4967	0.176373	0.472473	0.104387	-0.0591654	0.151351	0.354448	0.328108	0.226842	0.673058	0.507205	-0.643675	-0.442078	0.443649	-0.128748	0.140824	-0.617141	blue	0.156088	protein_coding
GPAT3	216.505	67.862	148.643	-80.7812	0.645852	0.0458012	0.188143	0.263248	0.422116	0.478291	0.157636	0.548	0.736026	0.379201	0.57009	0.858348	0.667875	-0.515696	-0.625708	0.0409006	-0.634917	-0.30969	-0.203206	green	0.263066	protein_coding
RNFT1	363.149	175.653	187.496	-11.8426	0.897985	0.480423	0.516432	0.346812	0.488782	0.206051	0.172379	0.271703	0.544734	0.293864	0.226537	0.612055	0.512989	-0.480398	-0.811254	0.00152809	-0.311367	-0.179159	-0.241798	blue	-0.0160272	protein_coding
COL3A1	57.8525	12.3906	45.4619	-33.0713	0.3661	-0.0740488	-0.087612	0.0539469	0.0776191	0.651341	0.416322	0.0922382	0.378896	0.434311	0.448979	0.588348	0.477836	-0.280749	-0.521309	-0.0574913	-0.430637	-0.310464	-0.199168	green	0.41934	protein_coding
H2BC21	34.7665	12.719	22.0475	-9.32847	-0.227365	0.20009	-0.151063	-0.361785	-0.291455	0.111388	0.382828	-0.165118	-0.272312	-0.454533	-0.506979	-0.574734	-0.576593	0.256182	0.159606	0.072828	0.329536	-0.0181999	0.243657	green	-0.523172	protein_coding
DTX3L	186.665	57.9143	128.75	-70.8361	0.522383	-0.126031	-0.0229375	0.141721	0.183989	0.525729	0.182152	0.227949	0.264643	0.365972	0.72639	0.836844	0.767714	-0.412417	-0.587846	-0.00216734	-0.614906	-0.404127	-0.304912	green	0.493548	protein_coding
ABCB10	222.231	126.961	95.2697	31.6914	0.820818	0.620073	0.348028	0.203579	0.353541	0.24627	0.380567	0.194504	0.527813	-0.130092	-0.0243078	0.362934	0.31716	-0.371866	-0.702482	-0.124121	-0.208822	-0.408983	0.00719642	blue	-0.280554	protein_coding
ZNF281	136.885	48.3728	88.5121	-40.1393	0.434502	-0.0781926	-0.0675888	-0.127	0.0481021	0.537061	0.14319	0.31294	0.370265	0.0907255	0.645822	0.799286	0.563323	-0.357468	-0.549618	0.103355	-0.52175	-0.342743	-0.30407	green	0.34709	protein_coding
TLR1	191.505	71.0705	120.434	-49.3639	0.261541	-0.459616	-0.22342	0.32882	0.144708	0.531992	0.189152	0.345895	0.321034	0.582534	0.85393	0.750087	0.80347	-0.276722	-0.399861	-0.203809	-0.813827	-0.434494	-0.0827811	red	0.742713	protein_coding
NPTXR	148.804	44.5242	104.279	-59.7551	-0.361575	0.299951	0.059543	-0.429829	-0.389428	-0.518775	-0.216185	-0.425099	-0.461955	-0.608016	-0.732088	-0.714148	-0.797206	0.52075	0.293418	-0.0989755	0.782412	0.343745	0.144697	brown	-0.56262	protein_coding
CLEC4G	20.0741	11.2456	8.82841	2.41723	0.0919738	-0.161753	0.139126	0.211822	0.167884	0.125817	-0.0491009	-0.139927	0.151301	0.829352	0.197478	0.273393	0.243843	-0.0830195	-0.163623	0.128049	-0.10663	0.139242	-0.211887	purple	0.394589	protein_coding
GHR	234.356	120.696	113.66	7.03583	0.839696	0.457173	0.553849	0.455271	0.641073	0.136441	0.113604	0.384148	0.622782	0.298149	0.142126	0.597591	0.522199	-0.560333	-0.658817	0.0886827	-0.327544	-0.142468	-0.199537	blue	-0.120639	protein_coding
CAMK2G	86.9341	45.2329	41.7013	3.53158	-0.192939	0.317779	0.0313726	0.0496387	-0.0810401	-0.299263	0.205164	-0.556471	-0.551056	-0.330661	-0.622486	-0.806425	-0.4617	0.168133	0.354137	-0.0973812	0.52887	0.160472	0.202227	green	-0.397846	protein_coding
FBLN2	55.5359	5.42067	50.1152	-44.6946	0.338636	-0.107624	0.126256	0.199982	0.382499	0.189845	-0.0953857	0.452924	0.747909	0.342113	0.435299	0.672079	0.531312	-0.529765	-0.179323	0.344807	-0.457253	-0.0434073	-0.289345	grey60	0.296115	protein_coding
CBLB	105.317	43.4399	61.8768	-18.4369	0.351768	-0.162552	-0.24907	0.361823	0.250147	0.65937	0.628608	0.455084	0.272796	0.120502	0.486064	0.437285	0.645058	-0.433265	-0.349692	-0.0285692	-0.803978	-0.587267	0.0479442	brown	0.180166	protein_coding
IFI44	170.27	51.441	118.829	-67.3883	0.335435	-0.289991	-0.179639	0.295117	0.093899	0.70218	0.308978	0.405846	0.336164	0.333877	0.800526	0.756248	0.694742	-0.36504	-0.420822	0.137433	-0.781375	-0.490107	-0.0718612	red	0.477981	protein_coding
FILIP1	99.4962	28.7576	70.7386	-41.981	0.385558	0.822967	0.464708	-0.229046	0.0718074	-0.309589	-0.0664224	-0.171522	0.268266	-0.472205	-0.66657	-0.212687	-0.449385	0.115156	-0.340832	-0.157494	0.556748	0.0639396	0.116805	black	-0.694796	protein_coding
VNN1	90.8764	39.9261	50.9503	-11.0242	0.117293	-0.470703	-0.311932	0.441065	0.241376	0.557597	0.408804	0.29643	0.249801	0.550714	0.672339	0.42194	0.669079	-0.34775	-0.106665	-0.0369557	-0.801546	-0.402799	0.0290203	brown	0.534612	protein_coding
ACSL5	191.727	68.0939	123.633	-55.539	0.302636	-0.378563	-0.0804613	0.295517	0.278275	0.517734	0.0823543	0.547433	0.577559	0.575792	0.746447	0.876785	0.761165	-0.417262	-0.409386	0.0363562	-0.786309	-0.302846	-0.19132	green	0.618583	protein_coding
NRGN	19.8969	2.65514	17.2418	-14.5866	-0.205541	0.0224785	-0.0683445	-0.645632	-0.367645	-0.0221117	-0.0403592	-0.250476	-0.469911	-0.397144	-0.124443	-0.204186	-0.391467	0.0742333	0.169099	0.4646	0.410172	0.329661	-0.384129	salmon	-0.244284	protein_coding
CSTF3	89.3152	48.7996	40.5156	8.28406	0.543263	0.581462	0.327217	0.11979	0.0842945	0.201276	0.346989	0.0109867	0.257719	-0.0662038	-0.213461	0.0758186	-0.050496	-0.0106641	-0.632522	-0.218683	0.0541333	-0.250074	0.161025	turquoise	-0.311171	protein_coding
ISG15	26.297	7.13534	19.1617	-12.0263	-0.0824488	-0.321475	-0.264058	0.134957	-0.254664	0.453056	-0.00409334	0.0995846	0.0981976	0.151099	0.537891	0.43848	0.311944	-0.0585179	-0.044316	0.237843	-0.331135	-0.287108	0.0297074	green	0.451068	protein_coding
SPTBN1	14.5697	4.36366	10.206	-5.84234	0.165704	0.144065	0.382332	-0.0161995	0.144952	-0.0836617	-0.263522	0.313665	0.311445	0.0934089	-0.0733882	0.258646	-0.0586803	-0.243045	-0.0956296	0.774125	0.117374	0.371438	-0.36763	cyan	-0.237067	protein_coding
GPM6A	149.484	54.9503	94.5334	-39.583	0.54704	-0.0279565	0.300448	0.291548	0.293195	0.270628	-0.102982	0.498184	0.449633	0.477017	0.560007	0.853744	0.61416	-0.374132	-0.623551	0.169688	-0.491566	-0.142302	-0.280992	green	0.342481	protein_coding
IFI16	127.025	51.9733	75.0517	-23.0785	0.44869	-0.164841	0.1129	0.25849	0.392332	0.230799	-0.0852002	0.227948	0.3539	0.467112	0.629018	0.819806	0.804406	-0.550246	-0.347548	0.141535	-0.540648	-0.155186	-0.429477	green	0.555782	protein_coding
LRRC32	19.5261	4.51949	15.0066	-10.4871	-0.00834008	-0.203714	0.158647	-0.132579	-0.00941262	-0.202204	-0.421955	0.0154566	-0.317186	0.0837352	0.244157	0.33582	0.183096	-0.121237	-0.0188065	0.245177	0.0818936	0.4056	-0.574891	grey	0.265337	protein_coding
LCP1	150.473	89.7921	60.6811	29.1109	-0.0746199	-0.659371	-0.511866	0.0719539	-0.172672	0.601407	0.205301	0.213866	0.0679673	0.437171	0.91054	0.529101	0.591031	-0.0914022	-0.0994056	-0.0811622	-0.725328	-0.45016	0.00866139	red	0.772302	protein_coding
GMNN	163.351	24.1412	139.21	-115.069	0.668614	0.145511	0.093575	0.524795	0.516086	0.454309	0.533132	0.279881	0.442204	0.203944	0.344775	0.531617	0.762245	-0.589682	-0.546337	-0.222171	-0.659521	-0.490966	-0.0203916	brown	0.211518	protein_coding
TMEM130	23.0585	10.8675	12.191	-1.32353	0.0904265	0.419902	0.273778	-0.358068	-0.189903	-0.176265	-0.292753	-0.379673	0.0755467	-0.234493	-0.230133	-0.013439	-0.316856	0.0386667	-0.0741239	0.259605	0.52268	0.272707	-0.177875	brown	-0.118936	protein_coding
IER5	59.406	24.5086	34.8975	-10.3889	0.539788	0.503947	0.346481	0.0306483	0.102967	0.181376	0.0713831	0.215978	0.366633	-0.314504	0.0588383	0.350182	0.0923421	-0.257464	-0.523288	0.204825	-0.0412254	-0.0731832	-0.0803463	blue	-0.247234	protein_coding
ZNF331	31.7944	4.0538	27.7406	-23.6868	0.418723	0.0717963	0.139471	0.222964	0.222312	0.220495	0.0455005	0.220109	0.252703	-0.0203962	0.425097	0.501193	0.439194	-0.369994	-0.310577	0.244802	-0.407976	-0.198696	-0.132686	brown	0.0740395	protein_coding
CA12	30.4109	12.9067	17.5042	-4.59746	-0.134506	-0.487694	-0.117849	0.0408016	-0.0406226	0.0359941	-0.319696	-0.0789723	-0.0534776	0.607133	0.60115	0.388672	0.316282	0.00797645	0.0194153	-0.0553686	-0.235356	0.112375	-0.267114	red	0.668372	protein_coding
SRGN	102.525	44.9148	57.6105	-12.6957	0.216001	-0.294815	-0.30094	0.236268	0.077516	0.602936	0.296289	0.269495	0.259097	0.188781	0.764881	0.574563	0.625746	-0.328297	-0.223705	-0.0602942	-0.724111	-0.536276	0.0472448	red	0.486871	protein_coding
SOX18	63.0255	3.50265	59.5228	-56.0202	0.209337	-0.289419	0.112933	0.064981	0.0230442	0.320385	-0.157549	0.621481	0.22545	0.382227	0.607852	0.710616	0.382926	-0.168559	-0.386721	0.291456	-0.446573	0.0196194	-0.27757	greenyellow	0.32938	protein_coding
PUM2	84.9593	36.4121	48.5472	-12.1351	0.272983	-0.0403331	-0.398575	0.221494	0.10433	0.793072	0.915567	0.0575224	0.204773	0.111188	0.223758	0.186717	0.489248	-0.296775	-0.303818	-0.350283	-0.563271	-0.756077	0.230421	pink	0.221297	protein_coding
AIMP1	189.249	34.3973	154.851	-120.454	0.763196	0.83575	0.835419	0.302113	0.576159	-0.339115	-0.0872632	0.24235	0.374016	-0.103514	-0.401845	0.0830557	-0.0257263	-0.349742	-0.546033	0.165727	0.198849	0.258423	-0.162209	black	-0.631051	protein_coding
H1-2	33.7124	11.0185	22.6939	-11.6755	-0.154169	0.163091	-0.0252042	0.0659618	0.0752125	-0.0682699	0.395756	-0.0550573	-0.21779	-0.208362	-0.590462	-0.607105	-0.325137	0.0383139	0.272616	0.00762542	0.209148	0.0282468	0.224478	red	-0.46455	protein_coding
CD79A	22.8111	13.8625	8.94852	4.91403	-0.0248987	-0.269353	0.0739834	0.304322	0.272253	0.0698777	-0.0371923	-0.0797559	0.0365979	0.829439	0.201876	0.151977	0.274464	-0.220443	0.077213	0.144155	-0.119377	0.191249	-0.256314	purple	0.44522	protein_coding
EXOC8	188.396	114.367	74.029	40.3382	0.816766	0.542844	0.47034	0.107226	0.499605	-0.00991945	0.0421412	0.177078	0.477469	-0.0195243	0.0777149	0.489916	0.38527	-0.447616	-0.641159	-0.127652	-0.139263	-0.109485	-0.278201	blue	-0.158852	protein_coding
PPL	10.4759	2.14048	8.33539	-6.19491	-0.0421667	-0.169646	0.0401545	0.0200646	0.346326	-0.21172	-0.0303201	0.373476	0.00609842	-0.032403	-0.0393492	-0.0392781	0.0714891	-0.226631	0.185003	0.00883775	-0.139163	0.262796	-0.224733	grey	-0.158207	protein_coding
PGF	11.3227	2.49883	8.82384	-6.325	-0.102693	-0.274699	0.000584604	0.223894	-0.0452695	-0.152754	-0.307677	-0.220158	-0.419524	0.182384	0.275258	0.180265	0.317228	-0.0782532	0.163497	0.239535	-0.0301577	0.114908	-0.25922	grey	0.400068	protein_coding
STAB1	124.354	55.4662	68.8882	-13.422	-0.00388303	-0.586397	-0.514626	0.0953043	0.0100365	0.707077	0.426947	0.116373	0.0812211	0.388777	0.817298	0.501359	0.647988	-0.32414	-0.0637995	-0.00987569	-0.748502	-0.404503	-0.149303	red	0.686599	protein_coding
CYBRD1	57.056	16.3082	40.7478	-24.4397	0.42044	0.522579	0.807381	0.0453625	0.423675	-0.632561	-0.549204	0.186121	0.254915	0.0944897	-0.322652	0.0553225	-0.166441	-0.185418	-0.206587	0.351864	0.401379	0.58296	-0.308707	magenta	-0.419952	protein_coding
MIS12	329.892	179.814	150.078	29.7363	0.905542	0.591271	0.632153	0.339251	0.609828	0.0232992	0.108046	0.396612	0.653094	0.175707	0.00207877	0.518104	0.398242	-0.494708	-0.752864	0.0257049	-0.200284	-0.0721849	-0.227287	blue	-0.253287	protein_coding
HSPBAP1	150.895	10.1806	140.714	-130.533	0.48858	-0.203389	-0.0143532	0.335664	0.495834	0.364469	0.237938	0.22261	0.358375	0.447464	0.61389	0.735422	0.896799	-0.614896	-0.37122	-0.121216	-0.698765	-0.321529	-0.342889	lightgreen	0.551496	protein_coding
GREM1	21.715	9.4607	12.2543	-2.79358	0.11825	-0.222389	-0.0407087	0.0627148	0.077788	0.0164659	-0.225045	0.2146	0.155851	0.189897	0.536562	0.412574	0.35377	-0.115879	-0.122169	0.00728646	-0.373156	-0.0916467	-0.146614	red	0.31078	protein_coding
IAH1	185.958	71.3822	114.576	-43.1937	0.652125	0.198408	0.0396099	0.233701	0.280921	0.426582	0.380274	0.308431	0.469375	0.0581616	0.415682	0.556492	0.617267	-0.376801	-0.660635	-0.305817	-0.562929	-0.534873	0.0230481	turquoise	0.154542	protein_coding
GRN	157.833	84.8074	73.0253	11.7821	-0.280794	-0.788557	-0.505008	-0.0787624	-0.247284	0.40252	-0.125403	0.180965	-0.0519425	0.345158	0.91507	0.540577	0.480387	-0.036214	0.112544	0.106328	-0.589212	-0.188396	-0.17388	red	0.782222	protein_coding
DPEP2	126.006	54.1846	71.8218	-17.6372	-0.0618501	-0.621414	-0.384893	0.187062	0.00478332	0.502852	0.129416	0.491727	0.277925	0.393369	0.816683	0.522127	0.523438	-0.135444	-0.0718168	0.0284115	-0.799891	-0.322088	0.0454359	red	0.569565	protein_coding
GPX8	187.146	24.7534	162.393	-137.639	0.723835	0.343793	0.31163	0.0681714	0.21407	0.383328	0.204696	0.211643	0.576955	0.261156	0.326346	0.64345	0.439704	-0.402497	-0.729973	0.159203	-0.272888	-0.217404	-0.260794	green	0.121819	protein_coding
TM2D1	61.9058	21.8739	40.0319	-18.158	0.413332	0.385452	-0.126304	-0.044419	0.0843671	0.508143	0.822716	-0.0301785	0.169657	-0.305669	-0.161117	-0.0503282	0.0996064	-0.19373	-0.420267	-0.297701	-0.201182	-0.572982	0.195431	pink	-0.307194	protein_coding
ARHGAP9	127.622	72.5194	55.1024	17.4171	-0.191796	-0.698826	-0.549937	0.0500292	-0.212154	0.613598	0.192773	0.206588	0.0905567	0.430681	0.873256	0.457443	0.490573	-0.0468688	0.00936935	-0.0465329	-0.691446	-0.396469	0.0736418	red	0.77358	protein_coding
CTNNA1	82.795	17.1411	65.6538	-48.5127	0.390911	0.607878	0.805439	-0.0237744	0.186659	-0.684004	-0.625536	-0.0492576	-0.0342045	-0.0563886	-0.387946	-0.0057073	-0.28717	0.0897334	-0.324762	0.124376	0.57833	0.517688	-0.226663	magenta	-0.426573	protein_coding
ECM1	109.271	59.5271	49.7439	9.78316	0.0305591	-0.497277	-0.290512	-0.0660072	-0.136016	0.453863	-0.0878249	0.257636	0.361345	0.446793	0.856962	0.686248	0.481762	-0.114567	-0.171175	0.191134	-0.576839	-0.2553	-0.155239	red	0.63294	protein_coding
ALDH1A1	36.5894	20.6983	15.8911	4.8072	0.556886	0.40264	0.466827	0.434676	0.480152	-0.0607131	0.0955982	0.280505	0.369175	0.146794	-0.12587	0.202384	0.258985	-0.384462	-0.329987	0.245619	-0.104744	-0.0719546	-0.0826423	blue	-0.312395	protein_coding
SOCS2	141.61	50.0965	91.5131	-41.4166	0.675409	0.325672	0.4919	0.0572546	0.339644	0.0907007	-0.15329	0.220265	0.393663	0.172968	0.268089	0.732738	0.448604	-0.493112	-0.634796	0.234093	-0.121165	0.10423	-0.522587	blue	0.126575	protein_coding
WNT2B	33.1158	3.03141	30.0844	-27.053	0.404973	0.464915	0.13115	-0.00676392	0.0563733	0.211668	0.197845	0.162976	0.70241	-0.245985	-0.108536	0.19334	0.0214415	-0.0881853	-0.424698	-0.205992	-0.0514218	-0.333965	0.297432	grey60	-0.182013	protein_coding
SPRY2	116.967	22.3851	94.5822	-72.1971	0.607849	0.173892	0.109949	-0.00120828	0.324165	0.435794	0.313785	0.262265	0.437775	0.0337514	0.357288	0.631957	0.532702	-0.572478	-0.51583	0.221427	-0.42818	-0.241308	-0.405684	green	0.0567238	protein_coding
DMXL2	146.34	52.8395	93.5009	-40.6614	0.246229	-0.32714	-0.348914	0.0839313	-0.129704	0.772527	0.40489	0.243258	0.242878	0.318802	0.807983	0.635896	0.583534	-0.0911433	-0.498388	-0.168237	-0.753602	-0.624413	0.107712	red	0.54365	protein_coding
SYK	165.341	84.4813	80.8592	3.62207	0.0890587	-0.576028	-0.331931	0.326109	0.143992	0.560035	0.219355	0.304126	0.188549	0.556905	0.89322	0.603524	0.719235	-0.343671	-0.105723	-0.00672245	-0.806203	-0.353179	-0.129502	red	0.706395	protein_coding
CD180	61.0131	24.5858	36.4274	-11.8416	-0.263062	-0.655748	-0.32507	0.0439504	-0.192515	0.256455	-0.19142	-0.119615	-0.0194087	0.706532	0.68129	0.406644	0.374365	0.08	0.0819688	-0.0475042	-0.32724	-0.0720126	-0.118434	red	0.866019	protein_coding
PARP12	162.079	62.3351	99.7437	-37.4085	0.163695	-0.492446	-0.298436	0.245762	0.0434133	0.63846	0.219628	0.214234	0.244245	0.490215	0.846818	0.769034	0.768612	-0.299078	-0.337376	-0.112832	-0.741602	-0.411744	-0.141282	red	0.794645	protein_coding
INAFM2	142.423	74.8114	67.6116	7.19978	-0.0138534	0.593261	0.369672	-0.521775	-0.185078	-0.67636	-0.409521	-0.523239	-0.332314	-0.565903	-0.707719	-0.525734	-0.675899	0.303913	0.101594	-0.00432644	0.900321	0.440585	-0.0991856	brown	-0.572081	protein_coding
POC1B	362.981	158.959	204.022	-45.0637	0.859811	0.611544	0.502055	0.167436	0.360581	0.121394	0.215147	0.184995	0.548168	0.154087	-0.0138637	0.411545	0.289085	-0.233184	-0.865543	-0.191464	-0.157281	-0.252018	-0.027964	blue	-0.194078	protein_coding
MFSD1	185.012	79.1025	105.909	-26.8068	0.291372	-0.398575	-0.23097	0.368766	0.168768	0.540673	0.246874	0.354444	0.274239	0.452915	0.871797	0.671699	0.777897	-0.314524	-0.337938	-0.1242	-0.841559	-0.484496	-0.0301535	red	0.620351	protein_coding
MKNK1	70.4652	6.06447	64.4008	-58.3363	0.146445	-0.346097	-0.475803	0.0812412	-0.0324226	0.799175	0.643232	0.0435382	0.321622	0.461795	0.525983	0.471953	0.582218	-0.161932	-0.366029	-0.383336	-0.642833	-0.665227	0.0874118	lightcyan	0.570089	protein_coding
CPEB4	93.609	42.8126	50.7964	-7.98375	0.536733	0.211746	0.193086	-0.235915	-0.000891618	0.414571	0.115152	-0.016689	0.217392	0.205343	0.357681	0.615637	0.331623	-0.294676	-0.639554	0.332727	-0.135768	-0.141411	-0.425358	turquoise	0.16259	protein_coding
IL4I1	45.1698	16.4303	28.7395	-12.3092	-0.289686	-0.626635	-0.403945	0.15806	0.0198899	0.312647	0.0180311	-0.0182697	-0.0994618	0.396539	0.635813	0.225597	0.370779	-0.194643	0.379804	0.163704	-0.436955	-0.107821	-0.120815	red	0.585591	protein_coding
SMAP2	106.031	49.6149	56.4162	-6.80126	-0.0733616	-0.550097	-0.572338	0.028091	-0.124273	0.667319	0.370287	0.235997	0.185015	0.23482	0.788977	0.404284	0.492819	-0.133073	-0.0550936	-0.0898444	-0.745975	-0.507105	0.0986377	red	0.570179	protein_coding
ZNF493	46.0913	25.2498	20.8415	4.40826	0.260286	0.186214	-0.154418	0.380342	0.286429	0.441097	0.849726	-0.089718	0.116175	0.0928987	-0.178813	-0.176582	0.228754	-0.266714	-0.163274	-0.422432	-0.261796	-0.48965	0.272105	pink	-0.0830246	protein_coding
TLR8	117.539	58.0151	59.524	-1.50889	0.103739	-0.528114	-0.310636	0.278579	0.0909323	0.45948	0.165764	0.193775	0.138551	0.58516	0.834535	0.560604	0.703148	-0.227765	-0.169729	-0.0796159	-0.742193	-0.372568	-0.085476	red	0.701997	protein_coding
ITGA5	26.141	5.55666	20.5844	-15.0277	-0.187524	-0.0636572	-0.402554	-0.524108	-0.283409	0.170101	0.282789	-0.331314	-0.460683	-0.516224	-0.0158304	-0.204563	-0.0898556	-0.0426857	0.211811	0.00952158	0.12464	-0.09654	-0.204923	blue	-0.0534752	protein_coding
NRAS	286.394	74.9275	211.466	-136.539	0.759397	0.190711	0.334691	0.241004	0.339171	0.357808	0.0586927	0.445302	0.543734	0.307853	0.545005	0.86314	0.660011	-0.501085	-0.728813	0.215202	-0.483136	-0.23826	-0.31659	green	0.207663	protein_coding
MCC	281.055	67.2572	213.798	-146.541	0.731473	0.216387	0.381293	0.174446	0.389029	0.375883	0.0956767	0.515908	0.698026	0.317279	0.405668	0.856696	0.563036	-0.490243	-0.76684	0.218702	-0.465243	-0.148258	-0.318806	green	0.128164	protein_coding
FGL2	89.3604	27.8602	61.5002	-33.6399	0.5031	0.808499	0.494316	-0.0688079	0.0680951	-0.163935	0.0686192	-0.11701	0.257354	-0.364969	-0.485756	-0.143116	-0.299627	-0.0184699	-0.38589	0.0760437	0.428524	0.0181645	0.0701008	black	-0.596537	protein_coding
GFOD1	18.5631	7.88205	10.681	-2.79898	0.356177	0.227199	0.0909478	-0.215519	0.247105	-0.0101609	0.170106	-0.136844	-0.00389986	-0.132635	-0.0703947	0.162409	0.246524	-0.29085	-0.254902	-0.251622	0.0202616	-0.0623213	-0.310468	blue	-0.00802522	protein_coding
SPAG4	62.495	7.34844	55.1465	-47.7981	0.147223	-0.419924	-0.0908682	0.539157	0.455177	0.387125	0.2489	0.373726	0.300528	0.716303	0.546297	0.454819	0.644168	-0.479646	-0.0624824	0.0853123	-0.686899	-0.116638	-0.209008	purple	0.492062	protein_coding
TAPBPL	12.5495	2.09362	10.4558	-8.36223	0.0924969	0.133928	0.286587	-0.0786988	0.0334969	0.0204418	-0.192044	0.0140845	0.314294	0.410836	-0.0207483	0.114686	-0.228966	0.0815706	-0.201906	0.277132	0.143518	0.273343	-0.122084	grey	-0.100071	protein_coding
CHUK	302.439	168.193	134.247	33.946	0.878332	0.663735	0.485593	0.112225	0.395369	0.0974806	0.165338	0.258898	0.555269	-0.108717	0.0118822	0.448692	0.320614	-0.403958	-0.76525	-0.0510915	-0.142753	-0.234684	-0.118563	blue	-0.276764	protein_coding
PPIL3	47.7943	4.34167	43.4526	-39.111	0.227692	-0.0819479	-0.285552	0.345128	-0.0272465	0.583863	0.532043	0.324336	0.26226	0.00611598	0.385431	0.244095	0.347733	-0.0225775	-0.342665	-0.242235	-0.634389	-0.741064	0.452971	midnightblue	0.0485929	protein_coding
EHD3	48.8013	28.7742	20.0272	8.74704	-0.04473	0.376989	0.283398	-0.372053	-0.336793	-0.439922	-0.397891	-0.553206	-0.405652	-0.256792	-0.355967	-0.304024	-0.474501	0.292945	0.0288433	0.22178	0.729195	0.377204	-0.177641	brown	-0.248811	protein_coding
MRPL44	57.2222	7.51343	49.7088	-42.1954	0.410307	0.0557394	0.592058	0.24377	0.473535	-0.158379	-0.385614	0.314076	0.177559	0.469258	0.243983	0.543388	0.328011	-0.517928	-0.242342	0.747258	-0.0962386	0.488092	-0.676406	magenta	0.0605887	protein_coding
LTK	163.489	127.035	36.454	90.5813	-0.537549	-0.398794	-0.438139	-0.128509	-0.0782816	-0.143415	0.00760463	-0.347018	-0.435876	-0.212151	-0.00933982	-0.392284	-0.0382797	-0.0743728	0.765964	0.106734	0.0684296	0.115478	-0.0971296	turquoise	0.181895	protein_coding
GEM	35.3983	9.68085	25.7175	-16.0366	0.240043	0.473555	0.496403	-0.0772131	-0.0311833	-0.246593	-0.321313	-0.0144434	0.266438	0.00321061	-0.303812	0.0110782	-0.35695	0.149511	-0.263095	0.289522	0.425975	0.253445	-0.0500981	brown	-0.377804	protein_coding
TSPYL4	213.558	113.67	99.8877	13.7824	0.815617	0.713878	0.680271	0.108522	0.472094	-0.0660711	-0.0518528	0.18574	0.481086	-0.0184308	-0.114283	0.435228	0.206275	-0.456996	-0.655918	0.175525	0.0718046	0.093522	-0.316544	blue	-0.301036	protein_coding
CR1	88.6774	37.5156	51.1618	-13.6462	0.2262	-0.349844	-0.0980804	0.133547	0.0534897	0.373174	-0.022364	0.0585893	0.193127	0.665859	0.775213	0.665173	0.619017	-0.181933	-0.352975	0.0486505	-0.543776	-0.218461	-0.223496	red	0.672143	protein_coding
NEURL1B	84.5147	30.5829	53.9318	-23.3489	0.186446	-0.447814	-0.105103	0.0382028	0.267557	0.391917	0.131103	0.262194	0.163624	0.559082	0.608652	0.673212	0.677036	-0.497158	-0.190511	0.18751	-0.533639	-0.0127284	-0.553411	green	0.596786	protein_coding
DOCK2	68.9587	34.1342	34.8245	-0.690308	0.153803	-0.440144	-0.0916339	0.16056	0.0392178	0.32784	-0.0458182	0.187147	-0.0153259	0.668756	0.758352	0.601023	0.596334	-0.171258	-0.248694	0.094375	-0.498567	-0.146049	-0.283115	red	0.645488	protein_coding
CDH13	48.3399	6.04911	42.2908	-36.2417	0.484673	0.551239	0.687118	0.0293217	0.402294	-0.413446	-0.25841	-0.280852	0.0190589	0.228717	-0.279251	0.0480841	-0.0158079	-0.348215	-0.251023	0.352441	0.443001	0.513695	-0.548565	black	-0.241205	protein_coding
GZMA	35.1864	2.66839	32.518	-29.8496	0.0361926	-0.455474	-0.137551	0.591676	0.23955	0.259913	0.0685259	0.401618	0.171517	0.577612	0.53338	0.397672	0.621182	-0.288481	0.0232979	0.00496046	-0.579552	-0.206207	-0.0134396	purple	0.569945	protein_coding
TFPI	149.615	62.2739	87.3412	-25.0673	0.501216	-0.0285496	0.0958583	0.0219804	0.184006	0.428725	0.0152357	0.279465	0.481002	0.319671	0.580792	0.869665	0.594611	-0.365258	-0.614668	0.0742737	-0.466877	-0.239108	-0.352977	green	0.387668	protein_coding
RALGAPA2	44.8592	10.0782	34.781	-24.7027	0.107605	-0.303252	-0.36613	-0.0666726	-0.00130989	0.645372	0.486592	0.217549	0.0759328	0.0315074	0.43039	0.474081	0.515886	-0.339476	-0.234043	-0.0919656	-0.51454	-0.363793	-0.198699	green	0.415971	protein_coding
HPSE2	9.03684	0.681346	8.35549	-7.67415	-0.199734	0.14944	0.0296694	-0.173021	-0.210494	-0.115603	-0.17686	-0.361236	0.081068	0.0349111	-0.328239	-0.21906	-0.340255	0.276971	0.0674604	-0.00783992	0.369526	0.115228	0.143573	grey	-0.0360839	protein_coding
YES1	189.978	17.9696	172.008	-154.039	0.735347	0.525316	0.471533	0.133787	0.34914	0.128367	-0.020644	0.230498	0.676961	0.0730495	0.0866139	0.584224	0.296001	-0.286898	-0.748573	-0.0844353	-0.155752	-0.191056	-0.0559715	green	-0.113288	protein_coding
GLRX	43.0033	12.495	30.5083	-18.0133	0.145213	-0.297938	-0.288454	0.261417	0.203687	0.243512	0.194176	-0.0146354	-0.0494017	0.10125	0.514151	0.382867	0.706035	-0.379893	-0.0159785	-0.236934	-0.526671	-0.396886	-0.108566	brown	0.527807	protein_coding
SLC15A3	174.763	99.549	75.2144	24.3345	0.0979463	-0.518168	-0.185461	0.101242	-0.0697039	0.385446	-0.170377	0.374388	0.234949	0.46075	0.94105	0.768821	0.606534	-0.155816	-0.250536	0.170442	-0.640454	-0.198529	-0.20368	red	0.69295	protein_coding
RWDD1	169.013	46.3061	122.707	-76.4012	0.73773	0.903485	0.763533	0.166444	0.47039	-0.355323	-0.05257	0.0996625	0.345834	-0.27975	-0.477067	-0.00823447	-0.0973593	-0.3446	-0.441902	0.137159	0.331084	0.198748	-0.128213	black	-0.642854	protein_coding
NXN	21.8058	2.14151	19.6643	-17.5228	0.20976	0.371712	0.353144	-0.300476	-0.0862548	-0.119362	-0.340194	0.183561	0.27525	-0.323305	-0.135002	0.224727	-0.296017	0.089581	-0.316125	0.136699	0.294721	0.235125	-0.118736	grey	-0.336019	protein_coding
KLF2	33.4592	9.51973	23.9394	-14.4197	0.0531662	-0.253878	-0.189281	-0.011168	-0.0719372	0.524798	0.168926	0.439598	0.274845	-0.0670817	0.497362	0.4788	0.287387	-0.233975	-0.156047	0.387464	-0.494323	-0.160097	-0.0952955	brown	0.185069	protein_coding
KALRN	35.3349	9.73493	25.6	-15.8651	0.0141535	0.395505	-0.0559863	-0.372869	-0.115842	-0.03336	0.394309	-0.618327	-0.416073	-0.407927	-0.48948	-0.536247	-0.357519	0.0662729	0.0359414	-0.23304	0.45798	-0.00540895	-0.0245986	green	-0.367685	protein_coding
GMFB	395.215	59.2133	336.001	-276.788	0.83875	0.319677	0.365702	0.307766	0.412346	0.397356	0.220184	0.525887	0.701086	0.259099	0.39926	0.764575	0.584942	-0.445388	-0.84198	0.0334872	-0.535963	-0.375337	-0.0950083	green	0.0441664	protein_coding
ZEB2	103.531	10.5163	93.0149	-82.4986	0.201249	-0.360899	-0.40163	0.0401866	-0.0836143	0.890507	0.607348	0.207449	0.221699	0.455866	0.660732	0.589888	0.581568	-0.192341	-0.465942	-0.137237	-0.682208	-0.587869	-0.0381776	lightcyan	0.55776	protein_coding
GPR160	157.102	42.5305	114.571	-72.0404	0.503537	-0.0978858	0.178726	0.312616	0.316037	0.446664	0.0933675	0.563657	0.651815	0.66343	0.616126	0.756549	0.586883	-0.353691	-0.580072	0.164264	-0.637564	-0.212791	-0.132384	green	0.34429	protein_coding
GPNMB	103.327	28.8206	74.5067	-45.6861	0.454349	-0.0900472	0.184792	0.295233	0.202183	0.161214	-0.20849	0.276485	0.325225	0.491644	0.716353	0.696279	0.58898	-0.240785	-0.459262	0.0916247	-0.50035	-0.173636	-0.1592	green	0.423651	protein_coding
COL9A2	149.985	9.34634	140.639	-131.293	-0.467255	0.18389	0.108036	-0.427353	-0.470888	-0.549923	-0.444801	-0.311506	-0.348696	-0.395553	-0.583932	-0.686502	-0.895956	0.675527	0.334682	0.0626558	0.754105	0.464299	0.236362	lightgreen	-0.48161	protein_coding
JAML	91.6624	35.905	55.7573	-19.8523	-0.170674	-0.676156	-0.404745	0.384674	0.102257	0.373282	0.0572317	0.273859	0.217045	0.589885	0.74992	0.396734	0.583429	-0.189344	0.157504	-0.056459	-0.706782	-0.290308	0.0864551	red	0.730691	protein_coding
FAM149A	65.1424	12.9611	52.1813	-39.2201	0.447713	0.596129	0.707986	0.365811	0.406506	-0.469418	-0.277907	-0.10174	0.30149	0.2788	-0.435835	-0.0534826	-0.0995882	-0.0289598	-0.340709	-0.142755	0.359163	0.311137	-0.00191982	magenta	-0.27435	protein_coding
NAP1L2	158.924	19.5316	139.392	-119.861	0.730205	0.839093	0.825985	0.221515	0.546905	-0.366661	-0.0988025	-0.173051	0.213084	0.0463793	-0.459588	0.0461595	-0.0210595	-0.340774	-0.475533	0.131026	0.375939	0.286194	-0.255218	magenta	-0.474363	protein_coding
PDLIM3	60.8481	20.9693	39.8788	-18.9095	0.0214875	0.4679	0.374545	0.0328909	0.0194458	-0.405059	-0.10858	-0.357699	-0.1436	0.0318627	-0.633281	-0.529815	-0.536407	0.255907	0.0200227	-0.012354	0.614297	0.313946	0.0950613	brown	-0.48353	protein_coding
OLFM4	11.3162	2.27889	9.03733	-6.75843	0.242574	0.364263	0.227788	-0.26653	0.195494	-0.135989	0.104398	0.183624	0.193278	-0.310096	-0.2897	-0.14604	-0.196957	-0.22649	-0.0324214	0.131532	0.200803	0.169036	-0.143737	grey	-0.436894	protein_coding
SCARF2	70.3112	37.0673	33.2438	3.82354	-0.205064	0.292503	0.207401	-0.570567	-0.272961	-0.539662	-0.489784	-0.39823	-0.480277	-0.621885	-0.378291	-0.380592	-0.585878	0.179119	0.305765	0.268035	0.747515	0.588798	-0.308351	brown	-0.370832	protein_coding
MICU2	338.751	181.756	156.996	24.7599	0.900277	0.551595	0.48675	0.380346	0.519054	0.190827	0.237212	0.244694	0.578065	0.234706	0.127301	0.513075	0.464332	-0.439558	-0.773308	-0.0757557	-0.288977	-0.27336	-0.0991082	blue	-0.144022	protein_coding
RBPMS	31.8535	6.93485	24.9187	-17.9838	-0.180423	0.154765	-0.199061	-0.269171	-0.119487	0.0565745	0.390663	-0.619953	-0.53577	-0.276481	-0.454367	-0.472467	-0.247028	-0.0262132	0.266138	-0.088506	0.424604	0.0371407	-0.149106	brown	-0.177524	protein_coding
GEMIN2	257.526	128.182	129.344	-1.16241	0.810466	0.492425	0.570849	0.371974	0.43677	0.011397	0.067651	0.197988	0.468326	0.330777	0.0698281	0.438647	0.365529	-0.266839	-0.763367	-0.0915792	-0.18631	-0.139058	-0.0899722	blue	-0.0861335	protein_coding
CTNNB1	78.9357	11.5075	67.4282	-55.9207	-0.0798426	-0.442858	-0.619642	0.137193	-0.139393	0.910675	0.70444	0.222896	0.207947	0.223956	0.529622	0.290666	0.40337	-0.125136	-0.103249	-0.12743	-0.711958	-0.683046	0.258424	lightcyan	0.399651	protein_coding
GMPR	80.3995	5.98451	74.415	-68.4305	-0.35237	0.277474	0.173425	-0.3372	-0.299282	-0.475886	-0.317302	-0.16644	-0.222835	-0.555783	-0.586759	-0.628418	-0.804018	0.404933	0.330232	0.178986	0.652852	0.4865	0.163465	lightgreen	-0.5456	protein_coding
ALG2	196.781	41.3312	155.45	-114.119	0.740871	0.252181	0.433883	0.2178	0.62291	0.136233	0.0617083	0.300861	0.414766	0.203973	0.313996	0.704099	0.653436	-0.769213	-0.523236	0.284114	-0.336202	0.0542339	-0.61554	yellow	0.11199	protein_coding
TRAPPC6B	341.821	179.319	162.502	16.8171	0.896157	0.77631	0.683455	0.17327	0.453624	-0.0484575	0.077217	0.0834286	0.49106	0.0933091	-0.138297	0.332055	0.183771	-0.336866	-0.784504	-0.0654775	0.0810483	-0.0141	-0.177006	blue	-0.322815	protein_coding
ESD	73.5844	16.1993	57.3851	-41.1858	0.303988	0.725496	0.391851	-0.413064	-0.154862	-0.2941	-0.155	-0.293877	0.156786	-0.40783	-0.542855	-0.20228	-0.532377	0.308971	-0.379978	-0.179954	0.607703	0.0632521	0.133333	black	-0.57326	protein_coding
ISOC1	320.189	29.8428	290.346	-260.503	0.84688	0.806887	0.757526	0.0968592	0.408908	-0.172079	-0.0366625	0.0299178	0.372252	0.0540195	-0.275608	0.291703	0.0887485	-0.259296	-0.768316	-0.00493564	0.23106	0.102634	-0.263375	black	-0.386864	protein_coding
MED13L	89.8748	34.9175	54.9573	-20.0399	-0.0475437	-0.32102	-0.658234	0.234758	-0.0273273	0.820771	0.903738	0.0640667	0.0714968	0.0326264	0.29581	0.0742625	0.437367	-0.211377	-0.0109575	-0.297168	-0.636766	-0.751264	0.30064	pink	0.274595	protein_coding
SLC16A7	102.588	51.8471	50.7412	1.10589	0.672415	0.637469	0.436728	-0.0600662	0.20643	-0.0819823	-0.0225155	-0.00613337	0.28227	-0.183324	-0.0986248	0.267136	0.118798	-0.183102	-0.619787	-0.0929221	0.0938324	-0.0797094	-0.156257	blue	-0.25265	protein_coding
ARHGEF10L	19.4875	3.80352	15.684	-11.8805	-0.0422788	0.174203	-0.216978	-0.261985	-0.167754	0.146409	0.509018	-0.577717	-0.401604	-0.245444	-0.348798	-0.398547	-0.152871	0.047897	0.0502167	-0.272667	0.296163	-0.181454	-0.0168268	pink	-0.105173	protein_coding
OLFML2B	99.8247	44.858	54.9667	-10.1087	0.245859	-0.303352	0.120432	0.0518942	0.158398	0.229608	-0.30346	0.202872	0.35295	0.656158	0.703272	0.804583	0.530806	-0.302399	-0.326572	0.370701	-0.409648	0.0861033	-0.487955	green	0.558359	protein_coding
DMPK	176.782	81.0634	95.7189	-14.6555	-0.26086	0.393127	0.201678	-0.479557	-0.224607	-0.59014	-0.274086	-0.623123	-0.578823	-0.513828	-0.694106	-0.715197	-0.734214	0.249086	0.38605	0.203849	0.909917	0.591092	-0.193379	brown	-0.544212	protein_coding
IVNS1ABP	120.88	35.0772	85.8029	-50.7256	0.412039	-0.0645401	-0.139002	0.102336	0.0434899	0.66585	0.314978	0.445722	0.564489	0.137923	0.586442	0.699482	0.512531	-0.259209	-0.540637	0.0707155	-0.667195	-0.591017	0.0533779	green	0.238266	protein_coding
COMMD8	210.687	118.617	92.07	26.5473	0.820012	0.482292	0.389815	0.47595	0.454473	0.168761	0.293292	0.201399	0.45593	0.193738	0.150443	0.395831	0.502191	-0.37563	-0.696243	-0.213716	-0.334131	-0.338633	0.0328897	blue	-0.034906	protein_coding
LAMB1	71.5696	11.5413	60.0283	-48.487	0.465266	0.0243416	-0.117618	0.258551	0.307833	0.580452	0.643254	0.183899	0.321407	0.188372	0.284184	0.434046	0.586215	-0.425406	-0.482119	-0.25219	-0.552899	-0.489638	-0.101825	brown	0.174372	protein_coding
RSL1D1	207.134	126.99	80.1442	46.8459	0.846552	0.54162	0.604973	0.290751	0.707771	-0.0971717	0.0673285	0.270708	0.465448	0.102626	-0.0203041	0.437618	0.465988	-0.623857	-0.588475	-0.036955	-0.148692	0.0540605	-0.35637	blue	-0.17001	protein_coding
IGSF21	44.8618	28.2026	16.6593	11.5433	-0.193286	-0.522136	-0.240443	0.0299102	-0.224658	0.133681	-0.33732	0.258619	-0.0165146	0.18555	0.725754	0.434918	0.285467	0.0735981	0.0815589	0.0625899	-0.387038	-0.0935001	0.00525406	red	0.557251	protein_coding
MMRN2	112.88	62.167	50.7134	11.4536	0.36772	-0.194321	0.248119	0.00869012	0.294681	0.192079	-0.230588	0.442928	0.35444	0.484034	0.543035	0.855429	0.548873	-0.438432	-0.432887	0.376371	-0.389021	0.158151	-0.619616	green	0.362861	protein_coding
AREG	25.6453	4.1535	21.4918	-17.3383	0.191774	0.0633456	-0.133952	0.00471868	-0.15375	0.447233	0.166297	0.364395	0.366125	-0.206875	0.344903	0.337435	0.119232	0.00961314	-0.332602	-0.0337042	-0.360023	-0.439017	0.264133	brown	-0.027854	protein_coding
CLDN5	54.9151	24.8288	30.0863	-5.25749	0.26523	-0.186805	0.163387	0.238204	0.329313	0.272643	-0.135214	0.486433	0.579938	0.527349	0.485287	0.701898	0.440285	-0.357349	-0.291742	0.310661	-0.455746	0.0266998	-0.287626	green	0.273645	protein_coding
CLSTN2	86.2784	37.0491	49.2293	-12.1803	0.086787	-0.478641	-0.272882	-0.0828857	-0.00480411	0.557051	0.154577	0.24005	0.20465	0.39772	0.645464	0.728939	0.58883	-0.244599	-0.310545	0.0453461	-0.567565	-0.252485	-0.307066	green	0.600909	protein_coding
SAT1	104.35	22.326	82.0244	-59.6984	0.42037	-0.0408349	-0.210707	0.116984	0.0985961	0.553165	0.360272	0.292418	0.481043	0.0483907	0.608994	0.568306	0.581206	-0.291415	-0.446875	-0.213812	-0.666396	-0.620579	0.101527	brown	0.32256	protein_coding
GULP1	139.111	49.9904	89.1208	-39.1303	0.359148	0.819738	0.6842	-0.102535	0.173241	-0.55945	-0.282514	-0.293671	0.0622235	-0.220301	-0.706887	-0.318501	-0.478739	0.0510624	-0.179124	0.0831183	0.740359	0.373621	-0.0598315	brown	-0.634302	protein_coding
SMTN	120.927	46.9102	74.0167	-27.1065	-0.26441	0.378479	0.0989797	-0.529369	-0.234266	-0.396271	-0.137544	-0.48593	-0.20627	-0.406162	-0.737311	-0.652503	-0.769868	0.30841	0.292372	0.0753063	0.806936	0.39245	-0.0126022	brown	-0.555808	protein_coding
FABP3	91.3284	28.6143	62.7141	-34.0997	-0.130543	0.407676	0.431146	-0.0179429	0.0273913	-0.729796	-0.446174	-0.270765	-0.447665	-0.414569	-0.613664	-0.613444	-0.581413	0.119507	0.408833	0.367542	0.725859	0.60386	-0.0783626	brown	-0.592512	protein_coding
SLC7A7	142.119	83.4608	58.6578	24.803	-0.131445	-0.705936	-0.502489	0.0511363	-0.124414	0.568146	0.144995	0.207091	0.0532932	0.418504	0.90064	0.550916	0.568367	-0.141313	-0.0177745	-0.0722853	-0.674263	-0.325125	-0.12026	red	0.774996	protein_coding
BAG5	169.445	72.2259	97.2196	-24.9937	0.710442	0.356891	0.537089	0.0990901	0.444193	0.236341	0.0989148	0.201584	0.530554	0.521046	0.140564	0.597754	0.341786	-0.482116	-0.709659	0.330396	-0.147142	0.12802	-0.49477	turquoise	0.0187688	protein_coding
POU2AF1	45.995	19.0195	26.9755	-7.95606	0.131467	-0.365287	0.00757545	0.471794	0.38403	0.301959	0.144748	0.16554	0.180318	0.906228	0.444661	0.403026	0.562168	-0.376864	-0.106015	0.0929491	-0.46332	-0.00021451	-0.267303	purple	0.551082	protein_coding
BGN	103.982	44.129	59.8534	-15.7243	-0.404702	0.107423	0.0448137	-0.583048	-0.445781	-0.473825	-0.443679	-0.722936	-0.609081	-0.324003	-0.351106	-0.480961	-0.62709	0.36808	0.406705	0.286203	0.789831	0.53882	-0.241524	brown	-0.176487	protein_coding
ICAM3	25.6311	7.23829	18.3928	-11.1545	0.151363	-0.167306	0.258331	0.520825	0.49372	0.0271844	-0.0298108	0.237028	0.268653	0.727536	0.19988	0.266551	0.370593	-0.441478	0.017814	0.260838	-0.231802	0.278247	-0.293338	purple	0.308499	protein_coding
CELF2	107.209	17.5703	89.6385	-72.0682	0.0430012	-0.446472	-0.586074	0.163381	-0.0384117	0.90396	0.751855	0.205137	0.202408	0.263208	0.59198	0.404808	0.580924	-0.239207	-0.222217	-0.198293	-0.783278	-0.664728	0.109335	pink	0.495288	protein_coding
LRIG3	198.142	81.7887	116.354	-34.5651	0.75038	0.452867	0.601164	0.200479	0.404288	-0.0797853	-0.0999582	-0.030669	0.355451	0.475584	0.0587399	0.487516	0.35583	-0.242908	-0.73093	-0.0775107	-0.0222159	0.0165754	-0.288352	turquoise	0.0624862	protein_coding
DCLK1	52.5259	2.39817	50.1278	-47.7296	0.46255	0.0482717	0.18745	0.299258	0.478363	0.310271	0.280492	0.501232	0.686246	0.521278	0.150793	0.477422	0.41188	-0.349925	-0.474723	-0.0871822	-0.439952	-0.164756	-0.108356	purple	0.0438711	protein_coding
WTAP	63.7468	5.79164	57.9552	-52.1635	-0.0748816	-0.477667	-0.520851	0.15213	-0.157165	0.803554	0.601458	0.300141	0.0458008	0.185384	0.540359	0.311517	0.404846	-0.0848949	-0.143672	-0.0376047	-0.717306	-0.55177	0.19369	lightcyan	0.420795	protein_coding
RHOBTB3	92.9637	24.8051	68.1586	-43.3535	0.548282	0.117353	0.13191	0.217903	0.437799	0.307569	0.22548	0.402974	0.623831	0.274103	0.255419	0.588067	0.56454	-0.424092	-0.530078	-0.157149	-0.500044	-0.337266	-0.0840246	blue	0.12541	protein_coding
EIF1AX	125.257	79.4303	45.8268	33.6035	0.740677	0.6827	0.370047	0.0698567	0.388822	0.136668	0.384216	0.0735249	0.325982	-0.324932	-0.159616	0.168947	0.17971	-0.461875	-0.509551	-0.000410278	-0.0171146	-0.180519	-0.145193	blue	-0.427546	protein_coding
LARP6	56.3263	29.9863	26.3401	3.64619	0.586439	0.438302	0.583975	0.404428	0.605814	-0.155267	0.0281089	-0.0347443	0.205106	0.412537	-0.136987	0.183331	0.260841	-0.393424	-0.396698	-0.0741307	0.0631557	0.262753	-0.324874	blue	-0.0792604	protein_coding
SPPL2A	267.12	121.622	145.497	-23.8754	0.815996	0.459657	0.345085	0.0763259	0.267843	0.286165	0.199405	0.186604	0.423911	0.13035	0.283928	0.568006	0.413065	-0.345493	-0.780779	-0.00222767	-0.267775	-0.303567	-0.211342	blue	-0.046086	protein_coding
BLNK	54.7294	12.1031	42.6263	-30.5233	0.263712	-0.294897	0.0537738	0.585874	0.409055	0.275366	0.167776	0.109224	0.144304	0.837025	0.512689	0.438328	0.668498	-0.374747	-0.207022	0.0307474	-0.542141	-0.124366	-0.189743	purple	0.539473	protein_coding
DIRAS3	111.992	16.3097	95.6825	-79.3729	0.666298	0.723206	0.754327	0.187752	0.413322	-0.379656	-0.217997	-0.11201	0.144891	0.00554176	-0.301267	0.127095	0.00641788	-0.17451	-0.53804	-0.0126684	0.289956	0.22232	-0.195964	black	-0.376927	protein_coding
SPATA18	75.5312	36.5955	38.9357	-2.34016	0.620637	0.615816	0.351401	0.188965	0.132608	0.0876039	0.212434	0.0418962	0.123828	-0.311482	-0.103526	0.149156	0.120559	-0.186273	-0.56046	0.0216468	-0.0108501	-0.265989	0.0526164	blue	-0.3772	protein_coding
FCN3	18.1537	4.1846	13.9691	-9.78446	-0.103374	-0.365843	-0.125714	0.222387	0.238436	0.167512	0.11668	0.675665	0.0674386	0.00103215	0.204529	0.206512	0.276418	-0.352463	0.187729	0.176808	-0.415417	0.0613163	-0.148849	greenyellow	0.0769626	protein_coding
ICAM2	91.2502	51.7833	39.4669	12.3163	0.274876	-0.230431	0.125899	0.0842888	0.234842	0.292493	-0.176044	0.368262	0.644175	0.649705	0.529581	0.817493	0.505147	-0.310287	-0.390167	0.154728	-0.408049	0.00129903	-0.341626	green	0.50447	protein_coding
UACA	27.0977	9.94803	17.1496	-7.20159	0.417096	0.315919	0.362586	0.400955	0.234705	0.0895901	0.0437828	0.58415	0.428134	-0.0400146	-0.00347443	0.248738	0.125885	-0.206997	-0.33598	0.269268	-0.227618	-0.150199	0.174093	blue	-0.279618	protein_coding
PTRHD1	162.212	9.83227	152.38	-142.548	0.334467	-0.377658	-0.0921333	0.628759	0.342698	0.529113	0.268739	0.346773	0.320607	0.720548	0.718026	0.720862	0.887896	-0.398563	-0.375851	-0.0899356	-0.818327	-0.435321	-0.051481	lightgreen	0.653711	protein_coding
TUBG1	12.2593	1.77816	10.4811	-8.70296	0.0874051	0.332298	0.159766	-0.318155	-0.201291	-0.0975325	-0.0500463	-0.134254	-0.134605	-0.444376	-0.254821	-0.114846	-0.329528	0.193891	-0.220645	-0.146575	0.364762	0.170248	-0.0247617	grey	-0.310299	protein_coding
PI16	12.6094	1.72408	10.8854	-9.16128	0.213969	0.278636	0.274235	0.192691	0.101507	-0.121242	-0.255883	0.0868554	0.6383	0.0502301	-0.0282934	0.166933	-0.0181756	-0.0232703	-0.152065	0.115906	0.0405935	0.0242518	0.173468	grey	-0.0852308	protein_coding
AOC3	115.896	62.2257	53.6707	8.55501	-0.0188652	0.58789	0.302559	-0.542987	-0.22986	-0.56437	-0.318411	-0.560905	-0.195632	-0.445475	-0.674815	-0.529046	-0.683646	0.308608	0.0894929	0.077115	0.861801	0.373717	-0.0687619	brown	-0.509649	protein_coding
FAM167B	42.5263	17.7524	24.7738	-7.02137	-0.057458	-0.446924	-0.0385978	-0.054364	-0.0073989	0.153679	-0.320983	-0.0701795	0.0171336	0.631979	0.553458	0.573091	0.391758	-0.138572	-0.0640303	0.183323	-0.179169	0.136062	-0.44726	green	0.686045	protein_coding
PNMA6A	8.19957	1.04091	7.15866	-6.11776	-0.0835592	0.084771	0.0629841	-0.0537019	0.0714373	-0.357361	-0.169604	-0.262811	0.0632473	-0.140875	-0.268457	-0.190167	-0.0816849	-0.0782856	0.333575	0.045002	0.289307	0.138489	-0.0644684	grey	-0.0157996	protein_coding
ELF2	57.0009	22.7203	34.2806	-11.5603	0.261162	0.0723168	-0.305599	0.00613586	-0.0561339	0.804548	0.817341	0.10082	0.218806	-0.00624502	0.16456	0.191969	0.249267	-0.184607	-0.417794	-0.0990477	-0.426874	-0.60772	0.137408	pink	0.0202642	protein_coding
LOXL1	64.0748	32.743	31.3318	1.41124	-0.0859013	0.380661	0.442065	-0.270261	-0.0666362	-0.597158	-0.558523	-0.35733	-0.175489	-0.299092	-0.438158	-0.29539	-0.521997	0.0866825	0.222425	0.333497	0.745691	0.711082	-0.291535	brown	-0.296751	protein_coding
KATNBL1	53.0582	12.67	40.3882	-27.7182	0.479528	0.457111	0.123185	0.132846	0.2254	0.366181	0.707774	0.00617359	0.102638	-0.0748668	-0.290122	-0.0396243	0.105411	-0.248893	-0.474241	-0.281674	-0.0505437	-0.309738	0.052057	pink	-0.286724	protein_coding
SLTM	200.938	113.703	87.2348	26.4685	0.792306	0.3874	0.212107	0.452866	0.586922	0.321711	0.495654	0.174301	0.455889	0.111135	0.162809	0.453986	0.668574	-0.617431	-0.566287	-0.2812	-0.445692	-0.46052	-0.0727789	blue	0.0357608	protein_coding
TBC1D5	67.1982	32.0577	35.1405	-3.08275	0.0163858	-0.277419	-0.535728	0.312857	0.0602675	0.717663	0.891234	0.00964908	-0.0327362	0.154585	0.195879	0.0551959	0.472769	-0.204721	-0.0872043	-0.423036	-0.568024	-0.6934	0.245564	pink	0.29054	protein_coding
HAS2	63.3366	13.8007	49.536	-35.7353	0.355898	-0.0015325	-0.0582859	0.0981771	0.020199	0.531339	0.32646	0.498217	0.552626	0.011448	0.322226	0.561091	0.344211	-0.112914	-0.580166	-0.147634	-0.520899	-0.446416	0.155307	green	0.0916205	protein_coding
KLHL42	141.909	58.1051	83.8039	-25.6988	-0.123577	0.534012	0.242379	-0.300939	-0.112906	-0.504974	-0.124685	-0.37778	-0.163123	-0.522985	-0.840714	-0.654075	-0.704963	0.27455	0.188334	-0.093218	0.795291	0.370476	0.0753825	red	-0.621449	protein_coding
IQGAP2	199.217	85.0457	114.171	-29.1255	0.189408	-0.468621	-0.298556	0.261204	0.103845	0.60034	0.200679	0.461505	0.406538	0.459014	0.886577	0.703899	0.711964	-0.287465	-0.274312	-0.00604863	-0.856162	-0.476415	-0.0038712	red	0.612515	protein_coding
TNFAIP8L1	190.358	68.4398	121.918	-53.4782	0.206187	-0.485666	-0.163955	0.0729366	0.0786779	0.582093	0.09699	0.391357	0.269386	0.503659	0.859615	0.856869	0.700787	-0.360429	-0.372009	0.146761	-0.69272	-0.192809	-0.37046	red	0.687794	protein_coding
FMNL2	86.9574	11.2383	75.7191	-64.4808	-0.10354	-0.487639	-0.667142	0.0874052	-0.178493	0.904334	0.737837	0.185646	-0.0175085	0.0649331	0.541981	0.293851	0.472637	-0.214049	-0.0467415	-0.0367373	-0.679445	-0.645045	0.100902	lightcyan	0.437568	protein_coding
C9orf72	103.664	12.5219	91.1424	-78.6206	0.620104	0.20443	0.264938	0.528071	0.510781	0.382511	0.379662	0.515093	0.476843	0.206343	0.283394	0.457218	0.525185	-0.525324	-0.519906	0.0580795	-0.576784	-0.245529	-0.0299036	yellow	0.00507187	protein_coding
PLXNC1	96.0109	10.5249	85.486	-74.9611	0.278725	-0.298578	0.113306	0.277406	0.219524	0.317321	-0.132436	0.346405	0.418752	0.809909	0.636556	0.759044	0.595208	-0.262885	-0.390589	0.147929	-0.515428	-0.0934807	-0.254305	purple	0.590536	protein_coding
CDH11	104.944	27.4184	77.5261	-50.1077	0.526268	0.254805	0.255036	-0.0200306	-0.0597152	0.2944	-0.0789441	0.220594	0.396677	-0.00368116	0.388564	0.662438	0.311859	-0.165932	-0.660374	0.234055	-0.22303	-0.214484	-0.126015	green	0.130391	protein_coding
NUDT19	155.936	48.0894	107.847	-59.7574	0.646433	0.190645	0.142235	-0.0413422	0.134854	0.345383	0.20127	0.124336	0.237643	0.137113	0.438705	0.611981	0.506345	-0.288258	-0.716039	-0.120123	-0.341912	-0.31161	-0.276612	blue	0.192834	protein_coding
MAN1A1	142.924	51.3517	91.5728	-40.2212	0.689159	0.160065	0.418971	0.32231	0.612869	0.11327	-0.0148283	0.436535	0.642024	0.428211	0.365828	0.707759	0.624871	-0.615149	-0.518749	0.251999	-0.467585	-0.0483335	-0.365841	blue	0.145244	protein_coding
SP1	21.5434	8.13731	13.4061	-5.2688	-0.119037	-0.181	0.0257266	-0.288997	-0.0977801	0.0397461	-0.175998	0.0857267	-0.16287	-0.0116027	0.17775	0.145692	-0.0361088	-0.224678	0.188787	0.884822	0.0559231	0.369338	-0.51878	cyan	-0.0213122	protein_coding
ATP13A3	32.4021	10.3397	22.0624	-11.7227	0.220929	-0.0980901	-0.163859	0.467817	0.297666	0.573989	0.698264	0.208323	0.143634	0.198405	0.154377	0.1786	0.476472	-0.458012	-0.0918159	0.0361024	-0.47514	-0.408914	0.0298846	pink	0.121799	protein_coding
CENPV	112.335	51.4548	60.8803	-9.42545	-0.00122513	0.592096	0.539291	-0.305409	-0.0480041	-0.661909	-0.437149	-0.315472	-0.238695	-0.345722	-0.711005	-0.518444	-0.712909	0.238825	0.0612469	0.171186	0.839946	0.663436	-0.122298	brown	-0.607672	protein_coding
ACADM	274.468	149.876	124.592	25.2849	0.869361	0.63144	0.567581	0.240619	0.435877	0.101212	0.13716	0.103804	0.402527	0.198976	0.0556046	0.416314	0.306421	-0.389141	-0.747492	0.0657001	-0.0727114	-0.109461	-0.217654	blue	-0.238051	protein_coding
HSPA4L	69.3912	24.625	44.7662	-20.1412	0.515373	0.810279	0.553467	0.0340859	0.179771	-0.274757	-0.0882261	-0.0651391	0.334509	-0.365555	-0.436281	-0.0925146	-0.260474	-0.0843923	-0.370468	0.087501	0.368745	0.0686356	0.0900899	black	-0.6055	protein_coding
CLEC10A	18.6714	3.60047	15.0709	-11.4704	0.149265	-0.22148	0.0100764	0.349125	0.366487	0.234481	0.0199911	0.154379	0.445141	0.652626	0.416351	0.388859	0.439486	-0.350276	-0.026292	0.123162	-0.402904	-0.0014185	-0.168311	purple	0.404768	protein_coding
BST1	64.9544	17.9572	46.9972	-29.04	0.366516	-0.0419731	0.126397	0.275816	0.189549	0.269513	-0.0407299	0.31211	0.772361	0.531677	0.448628	0.602672	0.432313	-0.129804	-0.467117	-0.0969756	-0.464672	-0.28256	0.147173	green	0.367112	protein_coding
COL6A3	121.947	6.50599	115.441	-108.935	0.271064	-0.381116	-0.0599224	0.138169	0.201052	0.492586	0.0538199	0.27466	0.33243	0.643884	0.742849	0.820853	0.688203	-0.420352	-0.327184	0.311213	-0.605193	-0.135743	-0.455248	purple	0.595875	protein_coding
TRIL	97.5289	29.6425	67.8864	-38.2439	0.401002	-0.0586975	0.153256	0.169616	0.124833	0.343008	-0.0126615	0.802561	0.685762	0.281089	0.434673	0.706503	0.369546	-0.108752	-0.5786	0.0402123	-0.529232	-0.28709	0.0677463	green	0.11917	protein_coding
PRELID3B	373.707	207.583	166.124	41.4594	0.923927	0.669934	0.699174	0.330129	0.493338	-0.0435692	-0.0590843	0.303618	0.604571	0.124483	0.0515436	0.523051	0.345416	-0.409682	-0.772625	0.0743957	-0.105135	-0.0617641	-0.165058	blue	-0.217784	protein_coding
SUB1	129.117	34.9966	94.1206	-59.124	0.657654	0.857331	0.753767	0.292724	0.43367	-0.306364	-0.0700043	0.0307326	0.304333	-0.175891	-0.475972	-0.0215088	-0.0916379	-0.298426	-0.397722	0.263999	0.339558	0.199319	-0.0754131	black	-0.602527	protein_coding
TUFT1	96.2016	18.5949	77.6067	-59.0117	0.685968	0.75836	0.539882	0.164374	0.483158	-0.205948	0.0617493	0.0608992	0.586083	-0.243136	-0.343033	0.0817821	0.0451711	-0.310347	-0.449211	-0.167638	0.126541	-0.0527857	0.0311141	black	-0.464225	protein_coding
TMEM176B	139.913	55.8132	84.0994	-28.2861	0.306355	-0.312476	-0.0312027	0.201778	0.214642	0.282948	-0.169021	0.26281	0.5071	0.528546	0.77534	0.840625	0.747769	-0.373365	-0.302749	0.0275041	-0.58818	-0.220511	-0.25779	green	0.702484	protein_coding
THBS4	36.4972	6.0251	30.4721	-24.447	0.197117	-0.254446	0.140902	0.470998	0.425561	0.0398126	-0.144747	0.729278	0.463592	0.33241	0.410112	0.465708	0.474074	-0.381729	-0.0620026	0.28664	-0.559243	0.0108495	-0.109429	greenyellow	0.16035	protein_coding
MAB21L1	23.3763	1.55093	21.8253	-20.2744	0.370084	0.149032	0.134339	-0.000161826	0.274751	0.268754	0.23556	0.50101	0.56819	0.120304	0.056255	0.342275	0.176089	-0.257475	-0.418392	-0.188748	-0.252857	-0.134049	-0.0255182	grey	-0.0545046	protein_coding
NAF1	178.115	66.9674	111.147	-44.1801	0.70744	0.662524	0.478903	-0.133958	0.126506	0.0150964	-0.00256192	0.0605351	0.437488	-0.0862362	-0.0964554	0.352871	0.0747957	-0.136362	-0.757546	0.0121671	0.10832	-0.0907339	-0.158776	blue	-0.2895	protein_coding
MEIS1	81.7925	40.2958	41.4967	-1.20088	0.0243281	0.523571	0.352519	-0.11562	0.0867157	-0.463114	-0.00216614	-0.176964	-0.0949983	-0.319308	-0.789625	-0.614784	-0.582079	0.155696	0.0648302	-0.131485	0.613329	0.36915	0.0751981	red	-0.614193	protein_coding
ABAT	27.2491	11.2081	16.041	-4.83281	0.108947	0.424697	0.0897073	-0.209472	0.0215984	-0.100796	0.344096	0.035735	-0.0487629	-0.395566	-0.605236	-0.445455	-0.388594	0.121896	-0.0837488	-0.300056	0.311343	-0.0496698	0.176518	red	-0.585746	protein_coding
RPRD1A	219.864	38.9463	180.917	-141.971	0.712983	0.859545	0.765618	0.0031935	0.253535	-0.302695	-0.165204	-0.0266893	0.293821	-0.0585351	-0.395232	0.0978711	-0.160636	-0.0426824	-0.691094	-0.00956809	0.381788	0.162254	-0.0689502	black	-0.519813	protein_coding
SGPP1	237.777	131.175	106.602	24.5729	0.84617	0.603366	0.684885	0.201556	0.41965	-0.120473	-0.117553	0.33514	0.479783	0.0723689	0.0380118	0.474499	0.263795	-0.348127	-0.699816	0.18137	-0.0597245	0.00337197	-0.213048	blue	-0.274814	protein_coding
PBXIP1	61.9595	33.5278	28.4317	5.09606	-0.10023	0.293506	0.387747	-0.448121	-0.0918589	-0.489085	-0.490418	-0.279355	-0.195168	-0.141593	-0.424488	-0.243251	-0.521709	0.0231209	0.233045	0.643387	0.733059	0.689161	-0.453299	brown	-0.363721	protein_coding
ATP10D	74.6826	42.0786	32.6039	9.4747	0.643689	0.669559	0.38338	-0.00390888	0.432388	0.00635601	0.347164	-0.176373	0.2092	-0.253574	-0.317909	0.07035	0.122278	-0.471946	-0.397219	-0.0749096	0.167308	-0.00850168	-0.309746	blue	-0.36083	protein_coding
IFT74	246.542	104.021	142.521	-38.4999	0.800704	0.529767	0.474553	0.372622	0.490867	0.25192	0.40065	0.260618	0.531224	0.321799	-0.0748941	0.364068	0.351606	-0.391587	-0.797894	-0.0921631	-0.224596	-0.207606	-0.0974735	blue	-0.216347	protein_coding
JCAD	84.8505	37.6366	47.2138	-9.57717	0.619687	0.477735	0.505204	0.104962	0.348502	-0.167586	-0.0322025	0.27983	0.30888	-0.0593319	-0.11955	0.267201	0.128028	-0.145957	-0.618327	-0.182335	-0.0414942	0.0110224	-0.10958	blue	-0.314969	protein_coding
PPP3CB	197.913	90.3578	107.555	-17.197	0.760292	0.747624	0.634915	0.220745	0.405958	-0.0987089	0.0464821	0.01069	0.389156	0.0511188	-0.286871	0.231187	0.0942131	-0.211212	-0.669289	-0.193318	0.176574	-0.047939	-0.049226	blue	-0.35688	protein_coding
NSUN6	92.7989	28.8794	63.9195	-35.0401	0.379024	-0.126455	-0.232561	0.452945	0.340797	0.62322	0.654971	0.311253	0.437815	0.267211	0.362928	0.450396	0.735412	-0.477591	-0.335975	-0.337812	-0.710257	-0.640236	0.112898	brown	0.365105	protein_coding
SWAP70	344.366	162.13	182.235	-20.105	0.880444	0.439476	0.493932	0.212785	0.513402	0.240163	0.106873	0.412213	0.611677	0.163241	0.267259	0.752993	0.557031	-0.627337	-0.743341	0.244164	-0.331767	-0.147009	-0.383833	blue	-0.0564375	protein_coding
GPR65	206.788	94.1093	112.679	-18.5699	0.241103	-0.450417	-0.188726	0.298612	0.060466	0.500381	0.0492118	0.32669	0.279791	0.479666	0.920366	0.793826	0.774527	-0.25731	-0.358287	-0.00170303	-0.778203	-0.406116	-0.0823442	red	0.718555	protein_coding
PPP1R3B	34.2757	13.4645	20.8112	-7.34675	0.0562885	0.26285	0.417808	-0.141882	0.160157	-0.51035	-0.246528	-0.404996	-0.431188	0.0467552	-0.484837	-0.241299	-0.230575	-0.0470528	0.0770177	0.204714	0.587191	0.532016	-0.469721	brown	-0.250247	protein_coding
NUAK2	180.011	59.3438	120.668	-61.3238	0.234658	-0.40262	-0.210172	0.0350558	-0.0659378	0.673702	0.159056	0.394791	0.313858	0.42891	0.834621	0.828715	0.610787	-0.158283	-0.526945	-0.021311	-0.716653	-0.410603	-0.105913	red	0.606366	protein_coding
LTBP4	66.2215	26.1648	40.0568	-13.892	-0.101222	0.372737	0.440567	-0.352067	0.0211517	-0.547109	-0.445259	-0.1059	-0.0658543	-0.325045	-0.53464	-0.367664	-0.628039	-0.000526985	0.296678	0.628024	0.697786	0.76901	-0.340142	brown	-0.581816	protein_coding
PLEKHB1	10.4127	4.99674	5.41599	-0.419246	0.0132312	-0.0801676	0.0554035	0.205933	0.002627	-0.0211098	-0.153803	0.738725	0.401665	-0.084817	0.134898	0.135037	-0.00618008	0.0634448	-0.04321	0.152646	-0.246987	-0.0813619	0.281211	greenyellow	-0.182503	protein_coding
RIPOR2	11.469	2.87748	8.59156	-5.71408	0.0787433	0.0883637	-0.196154	-0.284314	-0.094032	0.199278	0.380574	0.0464815	0.029163	-0.230694	-0.00601147	-0.16774	-0.0821831	0.00252805	-0.0711766	-0.183307	-0.0636324	-0.240784	0.138803	grey	-0.152428	protein_coding
ST14	65.7598	14.4053	51.3546	-36.9493	-0.43686	-0.715242	-0.480042	-0.112316	-0.146349	0.177657	-0.142022	-0.101418	-0.303087	0.14384	0.609279	0.231749	0.31733	-0.0931642	0.448526	0.0896678	-0.333845	-0.00927027	-0.198584	red	0.6951	protein_coding
BIRC2	138.209	50.2905	87.9189	-37.6284	0.643717	0.145732	0.121328	0.41227	0.578305	0.410528	0.41422	0.358553	0.531014	0.128827	0.328927	0.61239	0.734489	-0.71632	-0.399321	-0.0332486	-0.559856	-0.382601	-0.185792	blue	0.151882	protein_coding
RNF115	93.3763	23.2346	70.1416	-46.907	0.268444	0.796384	0.434772	-0.295188	0.0621294	-0.337824	-0.0176515	-0.252441	0.0743832	-0.503004	-0.686579	-0.427482	-0.595843	0.0393012	-0.118006	0.0977154	0.664279	0.279094	-0.0292995	black	-0.799151	protein_coding
C8orf88	132.964	53.8388	79.1252	-25.2863	0.328786	0.80873	0.657506	-0.312304	0.0966647	-0.615318	-0.343716	-0.300244	-0.0713096	-0.351927	-0.705522	-0.34456	-0.537342	0.0619894	-0.164992	0.147738	0.807779	0.468978	-0.198771	brown	-0.66204	protein_coding
HNRNPA2B1	56.962	25.5577	31.4043	-5.84666	0.352135	0.157807	-0.192588	0.322013	0.341188	0.504227	0.856256	0.0265846	0.125506	-0.0482895	-0.0155881	-0.015563	0.370622	-0.410928	-0.18513	-0.323841	-0.425869	-0.561314	0.154357	pink	-0.0900046	protein_coding
ZNF738	268.6	105.25	163.35	-58.0997	0.781923	0.680031	0.486133	0.0623836	0.176188	0.16648	0.185879	0.0604375	0.358413	-0.040292	-0.0367533	0.334675	0.128397	-0.154491	-0.808963	-0.0427725	-0.0152255	-0.233709	0.00281739	blue	-0.266951	protein_coding
MCL1	89.9935	39.1105	50.883	-11.7725	0.610709	0.414197	0.298178	-0.0318648	0.12231	0.280507	0.0904691	0.132484	0.277936	-0.0572554	0.21009	0.486538	0.24186	-0.307488	-0.577006	0.321135	-0.116736	-0.181291	-0.240616	blue	-0.158412	protein_coding
CTNNAL1	67.3327	30.8138	36.5189	-5.70514	0.591936	0.580421	0.665461	0.297724	0.337699	-0.235517	-0.145362	0.398612	0.344991	-0.0903882	-0.288911	0.224318	0.0670276	-0.221618	-0.492981	0.168123	0.138126	0.139618	-0.0950895	blue	-0.409645	protein_coding
RBM43	217.979	105.872	112.107	-6.2349	0.79625	0.338045	0.69136	0.304792	0.645855	-0.0284417	-0.147469	0.396263	0.456706	0.513707	0.220854	0.680818	0.502206	-0.60621	-0.630067	0.312006	-0.191898	0.240855	-0.58084	blue	-8.94771e-06	protein_coding
SLFN11	235.506	72.4661	163.039	-90.5733	0.665688	0.1141	0.179147	0.181875	0.242329	0.455175	0.128856	0.329645	0.491918	0.260615	0.572171	0.862196	0.664004	-0.435738	-0.707982	0.0919842	-0.525467	-0.378169	-0.226659	green	0.281884	protein_coding
FGD5	173.205	70.8399	102.365	-31.5249	0.380369	-0.310622	0.00758634	0.15166	0.193477	0.481716	0.050617	0.456561	0.433117	0.499846	0.760199	0.899436	0.702841	-0.402701	-0.478662	0.181839	-0.651749	-0.198165	-0.353163	green	0.514174	protein_coding
HSPA13	362.76	189.078	173.683	15.3949	0.906655	0.617381	0.702797	0.425562	0.507644	-0.00722355	-0.00951657	0.312074	0.491089	0.245137	0.055289	0.515475	0.377682	-0.405934	-0.791797	0.0773995	-0.12727	-0.0426077	-0.205864	blue	-0.182421	protein_coding
OSBPL9	41.3073	24.3611	16.9462	7.41491	0.0713741	-0.0317347	-0.352729	0.236616	0.218624	0.562672	0.853124	-0.0604067	-0.00113924	-0.0571869	-0.0888892	-0.081454	0.286903	-0.382424	0.0357985	-0.221849	-0.314733	-0.445469	0.0531685	pink	0.0207508	protein_coding
FAM13B	102.709	58.6198	44.0889	14.531	0.700291	0.754169	0.449656	0.199319	0.499774	0.0179543	0.402357	-0.206516	0.307976	-0.100287	-0.39761	-0.0111037	0.131164	-0.476795	-0.401539	-0.0113066	0.160594	-0.0755853	-0.149968	blue	-0.420609	protein_coding
KPNA5	332.144	152.363	179.781	-27.4185	0.862701	0.574098	0.551999	0.333741	0.494941	0.162946	0.262699	0.190964	0.506819	0.319168	-0.0396756	0.437902	0.366463	-0.359537	-0.818808	-0.103045	-0.157012	-0.183693	-0.118228	blue	-0.170716	protein_coding
C14orf132	147.611	65.1468	82.4639	-17.3171	-0.19741	0.461195	0.376	-0.433005	-0.182422	-0.642392	-0.441053	-0.342684	-0.203576	-0.385754	-0.738195	-0.591105	-0.817316	0.310307	0.269966	0.358315	0.882937	0.650418	-0.100743	brown	-0.626141	protein_coding
PLEKHF2	136.321	85.7938	50.5267	35.2671	0.775873	0.523132	0.650823	0.2846	0.513205	-0.107653	-0.00273687	0.0528053	0.239038	0.232372	-0.010663	0.382359	0.378381	-0.534411	-0.519062	0.322827	0.0111846	0.129552	-0.435956	blue	-0.115857	protein_coding
NFIX	35.4949	12.6076	22.8873	-10.2797	-0.44656	-0.334067	-0.528589	-0.193637	-0.336733	0.241628	0.351965	-0.389071	-0.574914	-0.296711	-0.0282252	-0.273235	-0.0294832	0.0331021	0.417204	0.0232909	0.0554283	-0.1202	-0.0585339	blue	0.189551	protein_coding
BLOC1S2	247.97	51.7655	196.205	-144.439	0.642228	0.0104162	0.145116	0.436742	0.325726	0.428362	0.177243	0.458681	0.49552	0.371051	0.643081	0.792342	0.770298	-0.399586	-0.695559	-0.133571	-0.690967	-0.421562	-0.0546963	green	0.394114	protein_coding
C1QTNF7	75.6782	19.3435	56.3347	-36.9913	0.41634	0.704395	0.624399	-0.0612738	0.166899	-0.402184	-0.214178	-0.183447	0.188403	0.0458551	-0.510578	-0.178468	-0.376576	0.0747409	-0.332064	0.118015	0.539678	0.268733	-0.0812327	brown	-0.54237	protein_coding
CTSG	41.1014	10.481	30.6204	-20.1394	0.222867	-0.117029	0.128715	0.311551	0.036336	0.166564	-0.169606	0.41414	0.48445	0.571365	0.414697	0.446452	0.268388	0.126135	-0.374472	-0.0173688	-0.383871	-0.249878	0.233366	green	0.243387	protein_coding
S100P	27.1817	9.55565	17.6261	-8.07042	-0.180269	-0.0790418	-0.432099	-0.0846193	-0.0286338	0.329612	0.661695	-0.0367102	-0.0840377	-0.325602	-0.173228	-0.379271	-0.0786406	-0.0973199	0.272472	-0.111172	-0.1272	-0.2711	0.201193	pink	-0.185126	protein_coding
STIM2	139.605	38.502	101.103	-62.601	0.598687	0.140061	0.434758	0.137361	0.332664	0.197058	-0.149767	0.53403	0.60174	0.369579	0.406658	0.776875	0.456248	-0.381801	-0.646239	0.175041	-0.348607	0.0184536	-0.284424	green	0.202257	protein_coding
FBLN5	226.168	79.2194	146.948	-67.729	-0.184036	0.547673	0.288632	-0.337622	-0.148786	-0.652492	-0.226714	-0.389362	-0.258633	-0.585335	-0.889688	-0.789235	-0.820517	0.356462	0.29386	-0.0395565	0.873961	0.437335	0.138863	red	-0.702328	protein_coding
FKBP5	29.2272	5.30926	23.9179	-18.6086	-0.260424	-0.0187629	-0.184644	-0.388228	-0.112419	-0.177383	0.0227102	-0.206446	-0.473203	-0.590422	-0.205001	-0.344921	-0.245107	-0.00634208	0.347227	0.0838902	0.209176	0.180158	-0.158081	green	-0.25751	protein_coding
GABRR1	28.6479	14.9539	13.694	1.25992	0.497315	0.474754	0.460448	0.273589	0.361786	-0.183965	0.136804	-0.172637	-0.0969642	0.0884647	-0.261456	-0.0596005	0.112364	-0.257359	-0.28562	0.0880795	0.16109	0.0589652	-0.216602	blue	-0.316771	protein_coding
KDELR3	36.7122	11.2201	25.4921	-14.272	0.420929	0.169629	0.406432	0.0763071	0.162643	-0.107203	-0.260521	0.402397	0.398933	0.124233	0.157459	0.481844	0.231751	-0.106258	-0.490269	-0.0239058	-0.0953645	0.0872354	-0.151246	blue	0.0875506	protein_coding
ALG6	279.704	29.4037	250.3	-220.896	0.776275	0.171157	0.299215	0.437894	0.587407	0.409576	0.301547	0.477555	0.67911	0.410505	0.419854	0.778653	0.739276	-0.625248	-0.680958	-0.0110132	-0.62301	-0.294631	-0.229425	yellow	0.187909	protein_coding
APLNR	18.2335	7.34292	10.8905	-3.54762	0.0252203	-0.108816	0.0509398	-0.0402818	-0.150121	0.149852	-0.309718	0.0859485	0.374382	0.285563	0.359803	0.418034	0.0716439	0.105741	-0.144322	0.159852	-0.0913263	-0.0661766	0.0580002	green	0.304439	protein_coding
RNF180	127.552	36.1509	91.4008	-55.2499	0.65477	0.857792	0.681611	0.0750445	0.274691	-0.405487	-0.108921	-0.115456	0.124485	-0.332724	-0.470575	-0.0632259	-0.131794	-0.110614	-0.48425	-0.0757598	0.387837	0.0783069	-0.0261948	black	-0.531876	protein_coding
MANSC1	126.346	55.2033	71.1429	-15.9396	0.672475	0.705317	0.566921	-0.272539	0.163629	-0.150238	-0.0636465	-0.0550902	0.293662	-0.0733961	-0.218667	0.199672	-0.0671962	-0.13593	-0.621187	0.090118	0.286962	0.10565	-0.28843	blue	-0.335479	protein_coding
PCSK5	79.8138	15.7366	64.0772	-48.3406	0.508549	0.0358725	0.237437	0.107382	0.614555	0.145318	0.135172	0.0859659	0.326165	0.405456	0.231051	0.579157	0.623132	-0.718971	-0.29949	0.138997	-0.289508	0.101782	-0.666968	green	0.263849	protein_coding
TMEM209	203.839	95.492	108.347	-12.8546	0.783278	0.33435	0.646971	0.272018	0.583985	0.0147652	-0.0613487	0.48399	0.410186	0.411607	0.209535	0.616929	0.433313	-0.529223	-0.688909	0.239618	-0.253335	0.173133	-0.495747	blue	-0.0658154	protein_coding
TFB2M	200.177	19.8511	180.325	-160.474	0.791795	0.32419	0.531756	0.444231	0.634847	-0.0236851	-0.0626569	0.327801	0.510199	0.291513	0.2514	0.653672	0.646577	-0.555898	-0.618148	0.0381943	-0.376562	-0.0750169	-0.296537	yellow	0.0990405	protein_coding
DCK	249.292	43.7252	205.567	-161.842	0.73768	0.224267	0.22653	0.291207	0.266626	0.405811	0.208517	0.431335	0.541779	0.222636	0.514296	0.692254	0.576654	-0.341422	-0.750952	-0.0199565	-0.559269	-0.436276	-0.0376815	green	0.133609	protein_coding
TMEM47	110.173	58.1696	52.0031	6.1665	0.0570544	0.64698	0.351784	-0.421088	-0.173915	-0.467334	-0.249155	-0.422215	-0.109786	-0.442689	-0.673529	-0.473181	-0.651371	0.229809	0.0446186	0.123113	0.821195	0.3102	-0.0243088	brown	-0.588206	protein_coding
HSPA2	18.5733	7.14117	11.4321	-4.29096	1.09929e-05	0.263025	0.351527	-0.0858758	0.0946837	-0.344613	-0.260312	-0.167784	0.0160802	0.178975	-0.394515	-0.221294	-0.352367	0.0753237	0.077623	0.211595	0.443439	0.336673	-0.0915404	brown	-0.275413	protein_coding
BZW1	58.1025	7.34064	50.7618	-43.4212	0.554404	0.310774	0.387961	0.32171	0.432998	0.0871792	0.0422787	0.618178	0.446256	-0.152065	0.137397	0.430041	0.339372	-0.477423	-0.421218	0.18878	-0.314625	0.00606224	-0.146256	yellow	-0.18373	protein_coding
ANOS1	68.0285	37.7082	30.3202	7.388	0.629984	0.518252	0.416079	-0.0516019	0.281316	0.0445878	-0.0434691	-0.0273861	0.533432	-0.0151516	0.0593548	0.445145	0.209578	-0.398455	-0.477519	0.0449886	0.0850039	-0.00220245	-0.274409	blue	-0.0438759	protein_coding
PRKRA	47.4956	26.7983	20.6973	6.10102	0.215194	0.189918	-0.265168	-0.111162	-0.0763796	0.603032	0.865359	-0.110735	-0.00773929	-0.114395	-0.135927	-0.119439	0.0414841	-0.0223393	-0.349159	-0.307002	-0.174275	-0.553763	0.210435	pink	-0.176621	protein_coding
C1D	346.537	194.072	152.466	41.6062	0.916528	0.626716	0.593697	0.388416	0.540583	0.0410598	0.122696	0.192065	0.505943	0.14004	0.034946	0.495295	0.453226	-0.45114	-0.758849	-0.0483306	-0.172825	-0.170399	-0.165117	blue	-0.170918	protein_coding
SUGT1	322.228	160.881	161.348	-0.467066	0.863947	0.735978	0.5187	0.202368	0.390917	0.132102	0.232774	0.210221	0.544175	-0.0532373	-0.122748	0.362252	0.216406	-0.31451	-0.78891	-0.100046	-0.0708252	-0.261932	-0.0126423	blue	-0.372889	protein_coding
HERPUD2	126.169	14.0143	112.155	-98.1404	0.690581	0.480797	0.725182	0.154924	0.487451	-0.0542911	-0.146289	0.327187	0.417197	0.312581	0.0114361	0.470919	0.191422	-0.507714	-0.556704	0.604237	0.0294917	0.34431	-0.511994	magenta	-0.223872	protein_coding
TWSG1	102.462	44.2785	58.1839	-13.9055	0.275045	0.688496	0.697472	-0.0356635	0.223673	-0.652223	-0.431415	-0.321225	-0.063809	-0.134274	-0.599947	-0.293933	-0.398644	-0.0928705	0.0199115	0.338279	0.759838	0.584323	-0.281996	brown	-0.49964	protein_coding
IL18RAP	27.3572	4.37457	22.9826	-18.608	-0.306551	-0.34628	-0.584504	-0.108727	-0.347281	0.480719	0.488295	0.150091	-0.0261839	-0.097056	0.211189	-0.190765	-0.0540186	0.239309	0.102552	-0.254684	-0.35974	-0.446289	0.469945	pink	0.105007	protein_coding
RND3	44.1965	22.5179	21.6786	0.839267	0.542635	0.465787	0.315036	0.209377	0.251718	0.0512868	0.00967597	0.0692091	0.301855	-0.117882	0.00827591	0.308877	0.210554	-0.222499	-0.453415	0.0260697	-0.0826111	-0.233601	0.000475539	blue	-0.225498	protein_coding
MRTFB	31.3845	11.4163	19.9682	-8.55186	-0.00786837	-0.463131	-0.156544	0.157816	0.192574	0.290676	0.113904	0.172784	-0.13576	0.286887	0.416676	0.467113	0.543812	-0.3901	0.0101125	0.148785	-0.435107	-0.0306656	-0.391124	green	0.457144	protein_coding
PAN3	75.4077	26.5869	48.8208	-22.234	0.187596	-0.222858	-0.376675	0.244652	0.150542	0.864931	0.840747	0.158202	0.240597	0.347094	0.341995	0.323639	0.536744	-0.360611	-0.294999	-0.166223	-0.641081	-0.56704	0.0544735	pink	0.341833	protein_coding
FANCL	282.909	145.945	136.963	8.982	0.866248	0.409937	0.510004	0.358844	0.619093	0.14689	0.175239	0.199438	0.412034	0.357433	0.155355	0.624149	0.597051	-0.558504	-0.721983	-0.0210682	-0.286579	-0.145009	-0.365999	blue	-0.000787425	protein_coding
ROR1	55.9352	17.8626	38.0726	-20.21	0.173528	0.612085	0.237569	-0.245975	-0.186131	-0.052411	0.130017	-0.287082	0.116782	-0.290314	-0.595794	-0.289933	-0.484502	0.23311	-0.254106	-0.0874016	0.563541	0.00429116	0.154082	brown	-0.495146	protein_coding
CNN3	37.4026	6.36236	31.0402	-24.6778	0.346378	0.182592	0.568422	0.0665952	0.244901	-0.175391	-0.366265	0.248234	0.0782314	0.271988	0.0767637	0.381289	0.0947173	-0.356484	-0.235031	0.835061	0.121549	0.514182	-0.627067	cyan	-0.120538	protein_coding
GSPT2	178.614	90.31	88.3041	2.00583	0.77215	0.447135	0.595227	0.0814583	0.499492	-0.109006	-0.155258	0.204868	0.37721	0.0979748	0.107099	0.604014	0.420505	-0.513619	-0.637593	0.135954	-0.0762935	0.138236	-0.548125	blue	-0.069035	protein_coding
SRPX	55.9701	26.581	29.3891	-2.8081	0.20523	-0.337834	-0.0150735	0.0992471	0.340619	0.194425	-0.0856812	0.0961222	0.300027	0.621779	0.526051	0.667111	0.610173	-0.382472	-0.189907	0.00537834	-0.433695	-0.0256319	-0.459884	green	0.549513	protein_coding
SLCO2B1	130.021	73.1625	56.8584	16.3041	0.0501459	-0.581609	-0.253845	0.18677	0.0363977	0.408815	-0.00519415	0.178007	0.13644	0.619966	0.88641	0.652957	0.654838	-0.208831	-0.156184	0.0498933	-0.649842	-0.189575	-0.230285	red	0.749241	protein_coding
SPOCK1	12.3606	1.95128	10.4093	-8.45803	0.216778	-0.079163	0.0522411	0.0833735	0.428475	-0.0052374	0.0885119	0.396445	0.232249	0.154941	0.131471	0.208617	0.304477	-0.374029	-0.0554678	0.00935183	-0.304125	0.0131539	-0.275816	grey	-0.0422641	protein_coding
GLA	128.727	56.5662	72.1605	-15.5944	0.0469665	-0.534126	-0.321706	0.117459	-0.0541234	0.502697	0.0570132	0.385428	0.18064	0.209066	0.836284	0.706883	0.634556	-0.22835	-0.162512	0.038913	-0.693137	-0.325522	-0.132005	red	0.64437	protein_coding
FAM118A	11.6542	2.63433	9.01988	-6.38555	-0.245814	0.0189716	-0.205211	-0.197463	-0.376285	0.0837435	-0.139358	-0.12134	0.265631	-0.305853	-0.0141966	-0.0530745	-0.270048	0.29451	0.128998	0.0117411	0.0845665	-0.173797	0.411749	grey	0.0072912	protein_coding
RAB9B	109.921	30.8923	79.0292	-48.137	0.348105	0.815381	0.580009	-0.103059	0.208098	-0.503331	-0.128626	-0.219614	0.120534	-0.32257	-0.747582	-0.393344	-0.501402	0.0582592	-0.178704	-0.148095	0.669225	0.261978	0.0547289	brown	-0.70137	protein_coding
C6	22.1496	2.98028	19.1693	-16.1891	-0.175769	-0.502414	-0.127165	0.0867071	0.11675	0.125353	-0.0974608	0.664807	0.251515	0.291783	0.291089	0.320678	0.237147	-0.0552368	0.0414204	0.0806923	-0.452526	0.0633199	-0.0395281	greenyellow	0.229078	protein_coding
SV2A	160.52	72.7175	87.8028	-15.0854	-0.260264	0.402658	0.271039	-0.407369	-0.203121	-0.680662	-0.404574	-0.553332	-0.382276	-0.461374	-0.711479	-0.661267	-0.737663	0.321053	0.357207	0.0345423	0.904307	0.604974	-0.0733489	brown	-0.456411	protein_coding
OLFML1	132.005	29.5494	102.455	-72.906	0.642479	0.236182	0.583999	0.220619	0.536841	-0.00785102	-0.240454	0.425663	0.678842	0.502295	0.234446	0.703104	0.406257	-0.464222	-0.542122	0.343083	-0.225144	0.169021	-0.437864	green	0.0255794	protein_coding
CEBPD	28.2032	4.22551	23.9777	-19.7522	-0.147352	-0.319758	-0.536941	-0.2567	-0.188845	0.572616	0.397301	0.0621427	0.018806	-0.148832	0.349617	0.201792	0.217151	-0.121598	0.0328011	0.0122805	-0.4011	-0.421802	0.012575	magenta	0.216058	protein_coding
NUAK1	26.5682	5.82761	20.7406	-14.913	0.248951	-0.144267	0.0589432	0.221478	0.295799	0.264902	0.18297	-0.0466691	-0.0782103	0.289986	0.322542	0.446652	0.553236	-0.562848	-0.106555	0.263621	-0.248009	0.0676615	-0.560912	green	0.381905	protein_coding
OSTM1	263.027	144.943	118.084	26.8597	0.751204	0.513979	0.383719	0.00915148	0.13142	0.128811	0.0634299	0.291772	0.549443	-0.0659532	0.11665	0.504817	0.265757	-0.123785	-0.84384	-0.225661	-0.162524	-0.305235	0.0258823	turquoise	-0.0968315	protein_coding
NRBF2	241.282	53.5637	187.719	-134.155	0.729479	0.126862	0.269343	0.267025	0.386267	0.358438	0.144455	0.508649	0.49194	0.284477	0.547274	0.796097	0.676229	-0.494664	-0.700551	0.0820702	-0.597806	-0.303264	-0.236911	green	0.200222	protein_coding
C3orf38	332.596	187.877	144.719	43.1578	0.916011	0.568733	0.612168	0.17496	0.513331	-0.00191097	0.0191011	0.162932	0.427012	0.135276	0.0927462	0.583001	0.460467	-0.50744	-0.757748	0.0425926	-0.127272	-0.0540451	-0.394587	blue	-0.0908162	protein_coding
BHMT2	86.9488	24.8543	62.0945	-37.2402	0.447916	0.80328	0.544423	0.0262186	0.328235	-0.37287	0.116569	0.0583099	0.155549	-0.522993	-0.704415	-0.355135	-0.331231	-0.143822	-0.216819	-0.0208487	0.409405	0.172953	0.0688636	black	-0.822179	protein_coding
TRAPPC13	388.416	199.119	189.296	9.82314	0.85007	0.671774	0.513164	0.133063	0.315538	0.193898	0.201451	0.253368	0.617269	0.0860925	-0.0236171	0.426481	0.199229	-0.213843	-0.892459	-0.141446	-0.127842	-0.269614	0.043073	turquoise	-0.264871	protein_coding
VCL	171.932	76.244	95.6877	-19.4437	0.0877615	0.698126	0.53014	-0.266398	-0.00752016	-0.681983	-0.34651	-0.434039	-0.296105	-0.478682	-0.806414	-0.549641	-0.667922	0.184933	0.079609	0.142949	0.902594	0.512217	-0.131279	brown	-0.7248	protein_coding
PARM1	38.2603	13.5182	24.7421	-11.2239	0.0818085	0.4996	0.270846	-0.400541	-0.0686417	-0.292854	-0.000245599	-0.321925	-0.371985	-0.628138	-0.516078	-0.39235	-0.445338	-0.101143	0.0953996	0.475177	0.596026	0.399371	-0.329663	brown	-0.615742	protein_coding
CXCL3	30.4464	4.8471	25.5993	-20.7522	0.123041	-0.332083	-0.0108716	0.259649	0.240208	0.311225	-0.00825999	0.0858663	0.241786	0.66117	0.546763	0.513134	0.509089	-0.3994	-0.0669822	0.287589	-0.395984	-0.0134014	-0.337108	purple	0.567069	protein_coding
MPPED2	90.6733	20.8208	69.8526	-49.0318	0.507091	0.76352	0.649515	-0.00073911	0.278026	-0.279215	-0.0464495	-0.0228807	0.434682	-0.125981	-0.580498	-0.0651094	-0.283379	-0.0917956	-0.419116	0.0324761	0.437356	0.238543	-0.0529364	black	-0.553617	protein_coding
BARD1	152.299	35.7287	116.57	-80.8417	0.712287	0.863388	0.609552	0.0671138	0.370125	-0.137267	0.198078	0.0736878	0.257701	-0.348885	-0.520333	0.000282159	-0.0795265	-0.279368	-0.561631	0.00282766	0.287813	0.0162245	-0.0986041	black	-0.660516	protein_coding
CEMP1	344.745	234.839	109.906	124.932	-0.75314	-0.544438	-0.477165	-0.0723176	-0.17273	-0.167328	-0.135057	-0.380615	-0.486987	-0.118738	0.000466606	-0.448435	-0.166763	0.0956677	0.904524	0.0766914	0.10448	0.189743	0.0396699	turquoise	0.263534	protein_coding
PTGER4	196.908	76.7753	120.132	-43.3571	0.483863	-0.174634	0.107305	0.376057	0.244117	0.374686	-0.0424352	0.428329	0.472915	0.507509	0.733927	0.906919	0.781017	-0.365008	-0.544655	-0.0159181	-0.649395	-0.315571	-0.169941	green	0.589269	protein_coding
NID1	47.2773	18.2738	29.0035	-10.7297	0.417712	0.0422621	0.0617368	-0.154332	0.269677	0.370562	0.284589	0.22467	0.454087	0.263618	0.238468	0.50157	0.351123	-0.350553	-0.501973	-0.0090068	-0.325194	-0.106585	-0.361867	turquoise	0.0854315	protein_coding
STAC	46.0414	10.9397	35.1017	-24.1619	0.294385	0.624923	0.434196	-0.154014	-0.102981	-0.328332	-0.249865	-0.442744	0.0950568	-0.108908	-0.365035	-0.154054	-0.32179	0.176027	-0.274197	0.0390952	0.560083	0.152603	0.023684	black	-0.29705	protein_coding
PDZRN3	26.031	1.93487	24.0961	-22.1613	-0.150435	0.297996	-0.161682	-0.167534	-0.258667	0.0291029	0.266914	-0.25835	0.0792453	-0.429089	-0.52796	-0.432182	-0.413013	0.344884	-0.000159588	-0.442752	0.313521	-0.208437	0.472687	black	-0.302226	protein_coding
EIF4G3	54.913	18.188	36.725	-18.537	-0.0439126	-0.37588	-0.595026	0.109931	-0.116571	0.78527	0.788915	0.130642	0.019643	0.0838027	0.354818	0.150521	0.420486	-0.125063	-0.112231	-0.372532	-0.597977	-0.656829	0.217299	pink	0.383744	protein_coding
RRP15	286.42	155.126	131.294	23.8325	0.869545	0.705889	0.695381	0.43044	0.554863	-0.0631706	0.0364063	0.341798	0.538583	0.0313072	-0.112299	0.374362	0.264869	-0.394285	-0.735771	-0.00622413	-0.112682	-0.0578448	-0.0672134	blue	-0.365378	protein_coding
TMTC3	372.133	173.463	198.67	-25.2066	0.885153	0.675449	0.503454	0.07252	0.327554	0.171597	0.239518	0.170029	0.441436	0.00460505	-0.0466115	0.446886	0.290168	-0.338474	-0.849373	-0.0281771	-0.0760527	-0.238399	-0.165157	blue	-0.266328	protein_coding
APOL3	64.3867	17.9108	46.4759	-28.5651	0.327323	-0.152701	-0.0148947	0.0323621	0.404541	0.21177	0.0609598	0.211586	0.488394	0.279509	0.453413	0.591099	0.616957	-0.561911	-0.180452	0.0830177	-0.469585	-0.102538	-0.391004	green	0.395155	protein_coding
FAM171A1	83.6895	45.1011	38.5884	6.5127	0.314809	-0.173823	0.137753	0.0216733	0.190503	0.201851	-0.191869	0.545038	0.52901	0.263845	0.493846	0.797383	0.484299	-0.269188	-0.443942	0.031551	-0.432098	-0.0401503	-0.265859	green	0.362282	protein_coding
CCDC59	289.543	132.232	157.311	-25.0789	0.839381	0.355186	0.423348	0.57738	0.586665	0.228993	0.217708	0.337806	0.651894	0.456474	0.236869	0.631225	0.655855	-0.493765	-0.75245	-0.142361	-0.455438	-0.323091	-0.0836974	blue	0.0797925	protein_coding
ADRB2	73.2323	24.8079	48.4244	-23.6166	0.447219	-0.00718404	0.142056	0.0763165	0.241933	0.331021	0.047627	0.654246	0.684061	0.16281	0.411195	0.711536	0.422569	-0.363148	-0.504	0.185544	-0.471029	-0.124695	-0.24662	green	0.0653659	protein_coding
ARL13B	386.137	160.734	225.404	-64.6699	0.865293	0.645922	0.526781	0.190268	0.340109	0.183326	0.211632	0.401954	0.629353	-0.00283955	-0.00947295	0.457905	0.257276	-0.281064	-0.880452	-0.0403735	-0.203447	-0.256172	0.00140007	blue	-0.304926	protein_coding
MYL9	242.86	88.0319	154.828	-66.7961	-0.451321	0.262687	0.112023	-0.489099	-0.350604	-0.696529	-0.448294	-0.60516	-0.568246	-0.51076	-0.673706	-0.78065	-0.839761	0.47211	0.512218	0.0520558	0.919788	0.558965	0.00627794	brown	-0.462212	protein_coding
FOXO3	27.0372	8.08608	18.9511	-10.8651	-0.0209464	-0.0733677	-0.464282	-0.0345976	-0.199728	0.573535	0.642258	0.00434083	0.116771	-0.230559	0.0937921	-0.0208845	0.0754574	0.104887	-0.185221	-0.351767	-0.366055	-0.612614	0.36063	pink	-0.0193049	protein_coding
IER5L	10.8015	2.33816	8.46336	-6.1252	-0.1348	-0.162828	-0.133403	-0.19504	-0.0887865	-0.0151851	0.051743	-0.275171	-0.466148	-0.13392	-0.00988402	-0.0210662	0.122854	-0.189161	0.23702	0.220749	0.155525	0.113175	-0.406149	grey	0.162902	protein_coding
CYP2U1	202.67	111.308	91.3623	19.9458	0.806453	0.794508	0.71624	-0.0925473	0.409089	-0.202348	-0.109271	0.106716	0.447859	-0.114681	-0.203769	0.276625	0.0100397	-0.353438	-0.608876	0.192517	0.232928	0.189328	-0.356763	blue	-0.480083	protein_coding
MS4A6A	147.872	54.7697	93.1028	-38.333	0.313964	-0.333282	-0.174688	0.507254	0.220796	0.582809	0.310631	0.392739	0.427429	0.59021	0.753967	0.622515	0.736878	-0.287296	-0.387272	-0.107677	-0.843751	-0.496562	0.0929325	brown	0.540806	protein_coding
CNTNAP3B	138.711	32.48	106.232	-73.7516	0.539519	-0.0435876	0.0326941	0.26277	0.297894	0.568862	0.355	0.302143	0.578615	0.433818	0.541188	0.720962	0.646035	-0.385391	-0.60035	-0.0407411	-0.667689	-0.451843	-0.0683925	green	0.331765	protein_coding
RFC4	166.434	77.5316	88.9029	-11.3713	0.748385	0.369698	0.394774	0.49187	0.533083	0.152933	0.231467	0.244741	0.529029	0.285546	0.165759	0.477809	0.561555	-0.436899	-0.666967	-0.294639	-0.368886	-0.236975	-0.0204526	blue	0.0880216	protein_coding
CEP170	192.872	68.0063	124.866	-56.8596	0.478781	-0.0819359	-0.0554823	0.140296	0.0653484	0.589013	0.229149	0.329403	0.466203	0.315371	0.685899	0.770841	0.664872	-0.296379	-0.642324	-0.0251732	-0.636592	-0.488908	-0.0618921	turquoise	0.463425	protein_coding
ARMC5	313.526	236.109	77.4171	158.692	-0.670269	-0.500276	-0.36358	0.0102377	-0.026784	-0.24076	-0.154301	-0.205772	-0.465824	-0.0797979	-0.043022	-0.43062	-0.11263	-0.0580132	0.905088	0.23854	0.0983271	0.315949	-0.11047	turquoise	0.177951	protein_coding
OSBPL3	207.307	95.9896	111.317	-15.3274	0.125483	-0.55897	-0.300572	0.22751	0.0654941	0.64961	0.180146	0.426669	0.29174	0.552196	0.923493	0.741065	0.696093	-0.27467	-0.26713	0.0347803	-0.831482	-0.366925	-0.105132	red	0.69978	protein_coding
POLE3	258.651	121.363	137.289	-15.9257	0.822437	0.583799	0.696835	0.0617003	0.372674	-0.129448	-0.225385	0.215088	0.466023	0.156611	0.0878908	0.543817	0.28296	-0.353103	-0.763022	0.205244	0.00529254	0.13572	-0.367373	blue	-0.124646	protein_coding
AGA	161.93	16.4473	145.483	-129.036	0.764618	0.582775	0.775995	0.515649	0.592981	-0.256979	-0.171851	0.12395	0.403856	0.399725	-0.0796714	0.322289	0.292334	-0.382143	-0.539875	0.136698	0.0267035	0.134849	-0.191206	magenta	-0.168578	protein_coding
TGFBI	57.7671	24.4528	33.3143	-8.86149	0.0434108	-0.433073	-0.00994573	0.222098	0.154216	0.189742	-0.2641	0.0647672	-0.0566752	0.591087	0.705217	0.57985	0.544912	-0.351209	0.019134	0.436492	-0.378589	0.114583	-0.464543	red	0.618918	protein_coding
ZNF185	74.9467	19.4078	55.5389	-36.1311	-0.325916	0.153091	0.186591	-0.0860421	0.00596908	-0.552505	-0.250892	-0.265756	-0.281508	-0.188206	-0.545563	-0.644722	-0.593549	0.204999	0.48399	0.0284765	0.572245	0.548427	0.0225847	green	-0.349278	protein_coding
THAP10	226.11	97.9466	128.164	-30.2169	0.776784	0.475099	0.482883	0.160098	0.383616	0.0779108	0.143711	0.0846257	0.455468	0.297244	0.0256855	0.448028	0.340843	-0.252669	-0.783574	-0.163747	-0.131424	-0.145492	-0.196863	blue	-0.0811095	protein_coding
SELENOP	264.095	71.0564	193.039	-121.982	0.681763	0.0520134	0.161032	0.285555	0.336244	0.474446	0.182411	0.402199	0.643566	0.496933	0.611383	0.848437	0.734228	-0.442567	-0.700745	0.00948721	-0.638788	-0.412677	-0.177307	green	0.369889	protein_coding
VPS4B	285.793	176.518	109.275	67.2437	0.90382	0.553616	0.522314	0.304262	0.640149	0.0939749	0.204485	0.178559	0.477572	0.135814	0.0985675	0.518407	0.520475	-0.643438	-0.642787	0.0662901	-0.233087	-0.126162	-0.344382	blue	-0.145222	protein_coding
DUSP3	76.3719	30.4199	45.952	-15.5321	0.147824	0.495064	0.652629	-0.308103	0.00655941	-0.677267	-0.69487	-0.2071	-0.1463	-0.143461	-0.410732	-0.11434	-0.499915	0.186007	-0.120236	0.295069	0.732379	0.672208	-0.351037	brown	-0.459569	protein_coding
DKK3	63.903	35.3355	28.5675	6.76797	0.158301	0.589508	0.482237	-0.496972	-0.142189	-0.426015	-0.412686	-0.343336	-0.00108104	-0.319835	-0.416744	-0.174157	-0.535131	0.112219	-0.125926	0.275521	0.737809	0.539956	-0.291042	brown	-0.393431	protein_coding
CCNG2	43.0119	19.2882	23.7238	-4.43557	0.496677	0.420911	0.681697	0.260644	0.588464	-0.473466	-0.216656	-0.180694	-0.17028	0.265413	-0.225267	0.0427459	0.157386	-0.413743	-0.155171	0.290618	0.253536	0.412864	-0.513084	blue	-0.223649	protein_coding
NADK2	103.001	23.2315	79.7695	-56.5379	0.63214	0.790691	0.635223	0.135481	0.383009	-0.166833	0.0710661	0.0752586	0.481944	-0.0871942	-0.498906	0.0108292	-0.116782	-0.208133	-0.521894	0.0656857	0.256308	0.064459	0.0274948	black	-0.590835	protein_coding
TASP1	52.9188	12.5139	40.4049	-27.8909	0.541548	0.669091	0.520974	0.00764445	0.469506	-0.301576	0.13413	-0.213009	-0.0877073	-0.0619087	-0.468169	-0.19442	-0.0793352	-0.311088	-0.272659	-0.0460178	0.355265	0.212596	-0.31615	black	-0.488166	protein_coding
MCUR1	146.592	80.5755	66.0166	14.5589	0.665525	0.328099	0.32997	-0.121959	0.143071	0.211612	0.0466069	0.114695	0.281944	0.216646	0.288961	0.557704	0.323809	-0.23797	-0.745149	0.0575818	-0.129558	-0.116646	-0.333747	turquoise	0.0160532	protein_coding
CDC42EP5	49.882	17.0994	32.7826	-15.6832	0.477226	0.185629	0.454088	-0.0691994	0.258603	-0.0297711	-0.229384	-0.0113588	0.286845	0.433128	0.251026	0.54095	0.278771	-0.338365	-0.439404	0.255351	0.0396168	0.323092	-0.595704	blue	0.206419	protein_coding
OTUD6B	328.307	177.399	150.907	26.4924	0.892932	0.678684	0.495742	0.181397	0.45778	0.174343	0.343057	0.189684	0.48684	0.0113539	-0.0791974	0.361163	0.306299	-0.409325	-0.787472	-0.124233	-0.137243	-0.24049	-0.106784	blue	-0.280564	protein_coding
TMEM43	28.7866	12.7621	16.0245	-3.26243	0.311432	0.201487	-0.100378	0.0503997	0.0718128	0.499576	0.742285	-0.053958	-0.0260464	-0.0367201	-0.0532844	-0.0190417	0.146537	-0.209296	-0.335148	-0.0751806	-0.182097	-0.335743	-0.0410209	pink	-0.169514	protein_coding
ADD3	139.98	49.2617	90.718	-41.4563	0.652976	0.18944	0.362644	0.634624	0.575784	0.209964	0.13474	0.582682	0.84143	0.473216	0.251115	0.592814	0.571396	-0.433516	-0.544442	-0.0239089	-0.536617	-0.270132	0.0600941	blue	0.0755563	protein_coding
ISLR	19.472	2.45757	17.0145	-14.5569	0.0159545	-0.149027	0.0877688	-0.210477	-0.0283007	-0.00364361	-0.421346	0.208233	0.44397	0.222777	0.356153	0.434859	0.118382	-0.174878	0.00487841	0.473294	-0.0558353	0.26131	-0.333721	grey	0.293362	protein_coding
MYCBP2	88.179	7.10203	81.0769	-73.9749	0.204639	-0.421425	-0.268931	0.391978	0.373187	0.543255	0.382356	0.0790922	0.170045	0.587093	0.590056	0.603922	0.852766	-0.53622	-0.144251	-0.0911918	-0.70372	-0.379789	-0.276839	lightgreen	0.656413	protein_coding
PLSCR4	287.99	146.665	141.325	5.34041	0.852994	0.731281	0.585463	0.0672369	0.337849	0.0822407	0.12264	0.0189712	0.485565	0.0568398	-0.0842929	0.399726	0.207276	-0.348264	-0.761879	0.131934	0.0468538	-0.0895698	-0.223536	blue	-0.267417	protein_coding
RPS24	140.633	13.9351	126.698	-112.763	0.679954	0.230803	0.291573	0.451097	0.504734	0.467921	0.425686	0.526386	0.503865	0.373476	0.250207	0.544555	0.534941	-0.536476	-0.645564	0.0710304	-0.527836	-0.236413	-0.143525	yellow	0.0013895	protein_coding
S100B	47.0139	10.8472	36.1667	-25.3195	0.459439	0.125766	0.358548	0.34578	0.3386	0.00944525	-0.148983	0.822873	0.590803	0.139468	0.23206	0.466191	0.290722	-0.227739	-0.402253	0.200215	-0.395645	-0.101126	0.0310404	greenyellow	-0.166941	protein_coding
JADE1	25.1023	6.4589	18.6434	-12.1845	0.162433	0.433623	0.275044	-0.118801	0.295028	-0.454666	-0.0864852	-0.177286	-0.0858586	-0.421698	-0.499804	-0.307424	-0.22069	-0.126046	0.0594613	-0.070063	0.345726	0.250379	-0.166168	red	-0.533289	protein_coding
S100A10	148.034	51.1501	96.8843	-45.7341	0.224574	-0.384152	-0.214549	0.408529	0.091907	0.574712	0.16872	0.507728	0.543506	0.417158	0.76201	0.740646	0.680206	-0.199997	-0.355765	-0.114184	-0.816138	-0.550246	0.151587	brown	0.558064	protein_coding
MORC3	304.225	126.711	177.514	-50.8024	0.816819	0.48825	0.277608	0.122327	0.273405	0.344954	0.388573	0.0994869	0.424459	0.107359	0.155139	0.495073	0.45917	-0.34371	-0.833935	-0.1526	-0.272833	-0.428349	-0.107891	blue	-0.051451	protein_coding
FGF9	42.2355	5.40768	36.8278	-31.4202	0.402312	0.12113	0.159293	0.370701	0.283729	0.253629	0.163615	0.686772	0.755512	0.0950907	0.20158	0.371211	0.285662	-0.247957	-0.356493	0.0869919	-0.471032	-0.301201	0.215257	greenyellow	-0.113516	protein_coding
COLEC11	9.38497	3.07704	6.30794	-3.2309	0.0689187	-0.0972397	0.0747535	0.0266151	0.0675349	-0.0891996	-0.223525	-0.27261	0.0892108	0.613403	0.190767	0.191219	0.17477	0.0710544	-0.127521	-0.143196	0.0248923	0.0390494	-0.145001	purple	0.325492	protein_coding
THBD	53.7763	18.2698	35.5065	-17.2367	0.345906	-0.00785411	0.184945	0.019957	0.0280982	0.322705	-0.108637	0.472001	0.325368	0.246329	0.463076	0.663086	0.252934	-0.128951	-0.519671	0.20524	-0.301941	-0.0768848	-0.212569	green	0.116345	protein_coding
KLF3	300.515	146.301	154.214	-7.91327	0.861485	0.60785	0.697614	0.173456	0.402323	0.0119591	-0.0804591	0.342098	0.552018	0.122689	0.0774869	0.566512	0.279816	-0.416256	-0.758555	0.358217	-0.0728536	0.0468552	-0.305431	blue	-0.247682	protein_coding
C1orf52	226.93	128.896	98.0336	30.8626	0.835488	0.420928	0.32922	0.487344	0.693318	0.255341	0.475896	0.195857	0.518486	0.206541	0.0956666	0.453389	0.659424	-0.696609	-0.580173	-0.192498	-0.398204	-0.319885	-0.18484	blue	-0.0176856	protein_coding
GAREM1	112.676	33.9579	78.7184	-44.7605	0.544924	0.850415	0.468697	-0.0813038	0.0872051	-0.118793	0.0979296	-0.0629003	0.381946	-0.379928	-0.505238	-0.0866724	-0.306093	0.0247202	-0.519843	-0.109484	0.37139	-0.063173	0.14229	black	-0.639209	protein_coding
ICAM1	69.2457	27.6398	41.6059	-13.966	0.12022	-0.400423	-0.0128245	0.161265	0.0470264	0.334588	-0.167242	0.344781	0.245564	0.521504	0.697704	0.741353	0.527278	-0.242945	-0.279828	0.370419	-0.50378	-0.012196	-0.30155	green	0.570236	protein_coding
GPD2	206.941	38.7913	168.149	-129.358	0.53771	-0.102749	-0.115351	0.296825	0.234681	0.748687	0.569383	0.439174	0.443084	0.354246	0.583867	0.714145	0.756749	-0.428552	-0.627282	-0.0697217	-0.790291	-0.649074	-0.0208425	green	0.34386	protein_coding
AC005747.1	108.417	7.96275	100.454	-92.491	0.47867	0.082779	0.130973	0.252105	0.208992	0.329121	0.106169	0.701378	0.875266	0.25005	0.331064	0.610181	0.373547	-0.107605	-0.634639	-0.237878	-0.531623	-0.399788	0.236475	grey60	0.0676359	protein_coding
HNRNPD	117.02	10.4352	106.585	-96.15	0.715579	0.667882	0.646963	0.568993	0.636139	-0.0859421	0.145263	0.301332	0.408185	0.0314077	-0.279607	0.144916	0.179199	-0.461895	-0.438428	0.0969866	-0.0289305	-0.00819741	-0.0274847	magenta	-0.444884	protein_coding
TOB2	25.5259	7.91011	17.6158	-9.70567	0.141366	0.433228	0.133504	-0.676779	-0.132689	-0.186523	-0.0680319	-0.283566	-0.07922	-0.497831	-0.34083	-0.138319	-0.378278	0.0771059	-0.155129	-0.0333883	0.478087	0.143451	-0.239178	brown	-0.432641	protein_coding
MIB1	168.755	36.6968	132.058	-95.3611	0.743996	0.861729	0.728583	0.332252	0.52044	-0.329144	-0.0158229	0.076288	0.34594	-0.213709	-0.436762	0.0327275	0.00983713	-0.293492	-0.508887	-0.0824047	0.208284	0.0720468	0.0189779	black	-0.537323	protein_coding
RAPGEF4	118.86	42.7935	76.0668	-33.2733	0.501529	0.0418551	0.257721	0.0490533	0.159776	0.372186	-0.0162134	0.621857	0.480497	0.239718	0.430649	0.799961	0.417986	-0.310759	-0.640207	0.260395	-0.410077	-0.127939	-0.270984	green	0.146537	protein_coding
CITED2	30.5801	5.21935	25.3607	-20.1414	0.263715	-0.0967054	0.0434703	0.0337348	0.00621613	0.405716	0.127778	0.393811	0.167271	0.159822	0.488752	0.468349	0.245071	-0.216758	-0.346826	0.466	-0.405992	-0.100235	-0.227281	brown	0.0255078	protein_coding
HIVEP1	162.583	14.5001	148.083	-133.583	0.614018	0.110565	0.165007	-0.0194001	0.244183	0.402811	0.169116	0.193306	0.452691	0.246205	0.450649	0.760435	0.59372	-0.480131	-0.660057	0.0950316	-0.380587	-0.183609	-0.433236	yellow	0.303166	protein_coding
TMCO3	69.7788	13.7338	56.045	-42.3112	0.373344	0.61368	0.738087	-0.217692	0.102267	-0.539052	-0.641249	0.0875983	0.310101	-0.179936	-0.321787	0.126911	-0.328088	-0.0141831	-0.301355	0.485169	0.525919	0.537029	-0.278894	magenta	-0.452985	protein_coding
TMEM19	161.786	92.796	68.9902	23.8058	0.792143	0.545457	0.609915	0.243191	0.513974	0.0360547	0.00971343	0.379678	0.606861	0.080501	0.0881965	0.491115	0.328798	-0.551035	-0.568506	0.293919	-0.133614	0.0519637	-0.267494	blue	-0.176441	protein_coding
ZEB1	170.564	47.8443	122.72	-74.8753	0.618325	0.908698	0.792218	-0.156479	0.275884	-0.42991	-0.225215	-0.0860507	0.204567	-0.236092	-0.576388	-0.0435231	-0.31158	-0.11631	-0.476532	0.184047	0.582423	0.336689	-0.227716	black	-0.672101	protein_coding
CIART	8.68002	1.77348	6.90655	-5.13307	0.142884	0.120593	0.229892	-0.118505	0.0274336	-0.439927	-0.48505	-0.21293	-0.011182	0.00721969	0.0286774	0.132719	0.0547112	0.0820735	-0.122016	-0.0496132	0.187203	0.147512	-0.179709	grey	0.0349677	protein_coding
TMEM128	333.243	194.933	138.311	56.622	0.922049	0.606549	0.646511	0.383494	0.622457	0.0977701	0.210011	0.185446	0.477292	0.331138	0.00954225	0.452499	0.419894	-0.565249	-0.718058	0.139141	-0.139303	-0.0259671	-0.328082	blue	-0.196655	protein_coding
KYNU	190.767	89.8591	100.908	-11.0489	0.0776177	-0.57668	-0.317183	0.3746	0.0442013	0.53748	0.0921493	0.394699	0.295693	0.547488	0.912886	0.712709	0.741553	-0.207723	-0.210454	-0.105739	-0.827484	-0.4549	0.0375956	red	0.794645	protein_coding
INTS13	299.01	162.55	136.46	26.0903	0.875368	0.439265	0.333294	0.408941	0.507372	0.312428	0.34345	0.190286	0.453768	0.171232	0.262323	0.582397	0.65178	-0.55853	-0.712628	-0.111786	-0.405715	-0.414198	-0.13588	blue	0.0245674	protein_coding
NXPH3	199.713	78.469	121.244	-42.7754	-0.270364	0.373153	0.296299	-0.322193	-0.08367	-0.821907	-0.473107	-0.547207	-0.499268	-0.449922	-0.726516	-0.724644	-0.687492	0.249997	0.483216	0.0558722	0.907105	0.644287	-0.13469	brown	-0.474163	protein_coding
TMEM51	83.6326	44.7699	38.8627	5.90725	-0.333356	-0.670917	-0.518421	-0.0324415	-0.283011	0.360558	-0.105264	0.164659	-0.0714439	0.183862	0.787208	0.349723	0.305097	0.0508195	0.200161	0.0671008	-0.505565	-0.245914	0.0137164	red	0.587889	protein_coding
CTSL	194.12	100.662	93.458	7.20396	0.118611	-0.567699	-0.33436	0.225696	0.0839202	0.496704	0.0985078	0.216018	0.128351	0.46806	0.935661	0.70892	0.7967	-0.341202	-0.141573	0.0263062	-0.767884	-0.361454	-0.211893	red	0.770892	protein_coding
KIT	38.5308	5.58617	32.9446	-27.3584	0.505217	0.147165	0.238473	0.364638	0.413056	0.176818	0.0827388	0.439104	0.529837	0.333847	0.302867	0.434513	0.4135	-0.287987	-0.427396	-0.13282	-0.42488	-0.245023	0.0393725	brown	0.0748614	protein_coding
GM2A	167.209	82.7155	84.493	-1.77748	0.0659992	-0.557782	-0.398265	0.0572116	-0.0785745	0.620137	0.169071	0.377016	0.264794	0.36592	0.89923	0.687658	0.614585	-0.153083	-0.261139	-0.0424315	-0.789182	-0.464703	-0.0097875	red	0.661626	protein_coding
SH3BP5	163.852	49.1811	114.671	-65.4902	0.593946	0.0378038	0.0914806	0.252021	0.401679	0.472408	0.218837	0.38043	0.722357	0.380932	0.523858	0.7808	0.684238	-0.519072	-0.542987	0.0241911	-0.61741	-0.407149	-0.169993	green	0.287043	protein_coding
KCTD9	108.847	37.5476	71.299	-33.7514	0.506563	0.869705	0.584655	0.0191484	0.177294	-0.377937	-0.0483232	-0.265603	0.060616	-0.280816	-0.566001	-0.288716	-0.335386	0.00103811	-0.333568	0.0326109	0.521422	0.130799	0.0364416	black	-0.681703	protein_coding
LTN1	60.3928	4.9888	55.404	-50.4152	0.341567	-0.122768	-0.168795	0.213992	0.264884	0.74176	0.630822	0.140542	0.298297	0.421016	0.376459	0.510572	0.598293	-0.529698	-0.364998	0.0475691	-0.53869	-0.394783	-0.278422	lightcyan	0.35256	protein_coding
PIGF	214.606	51.031	163.575	-112.544	0.621689	-0.0067758	0.121166	0.327338	0.269014	0.495953	0.224098	0.363963	0.485484	0.414669	0.631967	0.80156	0.704481	-0.371031	-0.706785	-0.0926579	-0.638606	-0.370831	-0.140459	green	0.365803	protein_coding
FKBP1B	137.937	19.4671	118.47	-99.0027	0.649771	0.23907	0.221053	0.231754	0.236394	0.342382	0.194391	0.281525	0.522031	0.18406	0.376339	0.616638	0.492513	-0.294091	-0.703824	-0.236705	-0.383596	-0.315893	-0.0512181	green	0.191596	protein_coding
CIDEC	15.0381	7.99893	7.03922	0.959709	0.104618	-0.0692116	0.0856557	-0.0649995	-0.0630591	0.196893	-0.0313671	0.77495	0.211142	-0.06792	0.178822	0.314137	-0.0124349	0.0217867	-0.275404	0.182178	-0.217032	-0.0123313	0.00995608	greenyellow	-0.175093	protein_coding
COL1A2	70.0212	25.9159	44.1053	-18.1894	0.42861	-0.0227847	0.15349	0.0413195	0.161567	0.362828	0.0163077	0.0486271	0.270255	0.394172	0.518625	0.72391	0.500903	-0.381008	-0.467513	0.211417	-0.286239	-0.0155293	-0.481876	green	0.411114	protein_coding
DOK5	80.6715	29.2642	51.4073	-22.1431	0.541558	0.567254	0.620179	-0.048663	0.119073	-0.265059	-0.477442	0.028866	0.397758	-0.06005	-0.00334561	0.380992	-0.0429352	-0.0372323	-0.510487	0.120026	0.255825	0.180344	-0.148222	blue	-0.197152	protein_coding
SCN4B	76.6955	40.0759	36.6196	3.45626	0.445065	0.240317	0.367215	-0.0693272	0.0015002	0.154971	-0.225614	0.453909	0.639153	0.12007	0.224272	0.594108	0.0867468	-0.0108764	-0.639396	0.159521	-0.131131	-0.0272039	-0.0421749	turquoise	-0.0665267	protein_coding
C16orf72	74.5762	13.0646	61.5116	-48.4471	0.39724	0.666896	0.744136	-0.180776	0.0897212	-0.464467	-0.37982	-0.0592483	-0.0745546	-0.176984	-0.462556	-0.066323	-0.37143	-0.0227942	-0.32168	0.497257	0.608575	0.507537	-0.344216	magenta	-0.572383	protein_coding
HNMT	106.029	11.907	94.1215	-82.2145	0.570149	0.000882136	0.255268	0.559998	0.439039	0.419137	0.25061	0.252274	0.30446	0.645835	0.457669	0.646508	0.720068	-0.555599	-0.494403	0.237393	-0.523893	-0.197471	-0.284517	brown	0.361962	protein_coding
NUP58	61.2454	18.4313	42.8141	-24.3828	0.215284	-0.0680401	-0.375038	0.246741	0.00496301	0.628437	0.688045	0.370441	0.220088	-0.121451	0.292525	0.169864	0.375494	-0.0826767	-0.348643	-0.538789	-0.62727	-0.761098	0.451127	brown	0.111135	protein_coding
PLXND1	92.7037	38.7586	53.9451	-15.1865	-0.071435	-0.612945	-0.243324	0.0644477	0.118512	0.238678	-0.127529	0.0955839	-0.0976267	0.414021	0.764126	0.566546	0.622499	-0.420859	0.15766	0.284086	-0.473258	0.0426345	-0.512673	red	0.739367	protein_coding
DNAJC10	164.507	76.1902	88.3172	-12.127	0.733574	0.698191	0.710471	0.100082	0.318011	-0.177701	-0.033724	0.0212086	0.176667	0.107936	-0.208558	0.174373	0.0139997	-0.210257	-0.645014	0.0837939	0.252908	0.19141	-0.275864	blue	-0.353398	protein_coding
TMEM61	134.361	33.1875	101.173	-67.9857	-0.511961	0.0604254	0.0564829	-0.306514	-0.257611	-0.627635	-0.411359	-0.482865	-0.51527	-0.22166	-0.522838	-0.720536	-0.73039	0.50029	0.502736	-0.0603521	0.693162	0.526109	0.068243	green	-0.316701	protein_coding
PRDM6	41.6999	10.0659	31.634	-21.5682	0.312596	0.569822	0.385248	0.0639495	0.306009	-0.337007	0.0994597	-0.538088	-0.0725551	-0.071267	-0.598493	-0.298536	-0.132898	-0.143744	-0.0710791	-0.200803	0.497254	0.146047	-0.11268	brown	-0.327477	protein_coding
TPSB2	26.7213	7.56448	19.1568	-11.5923	0.0549598	-0.342395	-0.215845	0.14046	-0.0449716	0.296474	-0.0107164	0.494522	0.52098	0.267284	0.57529	0.459469	0.337249	0.0338721	-0.168527	-0.144429	-0.543064	-0.377115	0.216224	brown	0.318952	protein_coding
GALNT6	154.702	70.8206	83.8813	-13.0608	-0.306413	-0.813359	-0.56952	0.124287	-0.190843	0.502361	0.0299976	0.293068	0.0425356	0.346859	0.880041	0.494233	0.500877	-0.028263	0.144309	-0.0597351	-0.713259	-0.338169	0.0559955	red	0.777912	protein_coding
AC006059.2	221.822	103.157	118.665	-15.5071	0.788269	0.707514	0.468891	0.107104	0.270837	0.0842603	0.175122	0.108841	0.564844	-0.0753124	-0.102962	0.290516	0.125869	-0.203773	-0.767978	-0.152455	-0.0159497	-0.224159	0.0380074	blue	-0.328994	protein_coding
RRM2B	121.414	16.3365	105.078	-88.7411	0.697182	0.432131	0.387969	0.248653	0.256892	0.126726	0.0148858	0.401504	0.445415	-0.145765	0.26412	0.520061	0.380702	-0.346474	-0.607768	0.0721656	-0.277678	-0.226956	-0.0240013	green	-0.0629388	protein_coding
ZNF521	184.702	77.526	107.176	-29.6503	0.478004	-0.199198	0.0640298	0.275117	0.330135	0.408316	0.0461964	0.405998	0.626953	0.544937	0.658215	0.908397	0.7825	-0.436963	-0.524048	-0.0485766	-0.648208	-0.288129	-0.2504	green	0.568021	protein_coding
CCDC68	41.0641	13.6758	27.3882	-13.7124	0.320054	-0.149951	-0.00774711	0.0192575	0.0913994	0.33733	0.0891699	0.174275	0.0229465	0.0793278	0.535593	0.613086	0.558298	-0.354642	-0.350679	0.195054	-0.452124	-0.174869	-0.309118	green	0.358307	protein_coding
PAM	25.3335	12.5126	12.8209	-0.308338	-0.0745176	0.0418385	-0.345293	0.0255916	-0.119639	0.391472	0.721034	-0.13439	-0.133028	-0.251064	-0.264036	-0.321054	-0.0956728	0.101068	-0.030955	-0.292671	-0.104792	-0.463911	0.342257	pink	-0.22957	protein_coding
ARHGAP36	34.5563	15.0089	19.5474	-4.53848	0.188404	-0.175364	0.0696984	0.430381	0.327892	0.25458	0.144484	0.90536	0.369167	0.137934	0.270411	0.374519	0.374792	-0.340856	-0.172755	0.21961	-0.55605	-0.0843767	-0.0046284	greenyellow	-0.028817	protein_coding
CD2AP	289.194	221.129	68.0651	153.064	-0.635618	-0.453083	-0.286628	0.00165062	0.0304888	-0.2921	-0.216996	-0.204527	-0.51767	-0.11463	-0.0661582	-0.415594	-0.154387	-0.0832987	0.909474	0.240692	0.164013	0.395237	-0.184155	turquoise	0.0794409	protein_coding
MBNL1	5.28432	0.970925	4.31339	-3.34247	0.0849302	0.188322	-0.0493541	0.0883758	0.106022	0.250587	0.44605	-0.100543	0.0386004	-0.0343679	-0.262506	-0.159881	-0.0498814	-0.132397	-0.0647415	0.0550154	0.0100609	-0.165477	0.0695521	grey	-0.203387	protein_coding
ASPA	105.515	9.14308	96.3722	-87.2291	0.547037	0.260986	0.356814	0.426357	0.35159	0.192055	0.0157912	0.670074	0.891946	0.270135	0.156597	0.5336	0.319274	-0.212623	-0.599805	-0.0315817	-0.405378	-0.239199	0.19673	grey60	-0.0604332	protein_coding
SLC16A9	65.3808	33.2378	32.1431	1.09472	0.195156	0.596258	0.373008	0.0230633	0.175912	-0.245678	0.202958	-0.200175	-0.0947609	-0.243039	-0.761695	-0.464154	-0.43243	0.105799	-0.157467	-0.181885	0.469859	0.109864	0.140566	red	-0.682308	protein_coding
PDK3	88.3049	42.5306	45.7743	-3.24369	-0.109717	0.462887	0.190905	-0.445831	-0.161038	-0.35512	-0.115997	-0.531823	-0.406857	-0.414385	-0.678534	-0.527341	-0.611455	0.207638	0.1449	0.0246453	0.788586	0.352921	-0.13428	brown	-0.503297	protein_coding
CAP2	91.6526	41.8501	49.8025	-7.95239	0.276103	0.750347	0.494946	-0.33238	-0.0214442	-0.406268	-0.247293	-0.37509	-0.00175343	-0.400067	-0.591693	-0.255889	-0.495737	0.0557911	-0.134348	0.180407	0.745901	0.301649	-0.152481	brown	-0.571775	protein_coding
ZFP36	35.9502	11.9159	24.0342	-12.1183	0.0624281	-0.15638	-0.213984	-0.317905	-0.274292	0.520677	0.0446002	0.292404	0.278586	-0.158768	0.497065	0.536946	0.156694	-0.0817451	-0.273111	0.305051	-0.32969	-0.224812	-0.12228	green	0.184614	protein_coding
NR1H3	123.202	35.6617	87.5404	-51.8786	0.156045	-0.506486	-0.0671197	0.0976288	0.147908	0.35106	-0.0709583	0.517364	0.30904	0.594733	0.782624	0.748332	0.607399	-0.304878	-0.270609	0.17011	-0.631593	-0.0256546	-0.363213	green	0.618043	protein_coding
NFYB	135.837	70.3316	65.5059	4.82572	0.716694	0.73237	0.578939	0.128516	0.48661	-0.173976	0.188824	0.114132	0.350094	-0.0634822	-0.428392	0.0264293	0.0246939	-0.231828	-0.583746	-0.177067	0.10609	-0.0508196	-0.000935079	blue	-0.546835	protein_coding
UBE2Q2	349.473	189.477	159.997	29.4804	0.906469	0.759086	0.714046	0.276192	0.480869	-0.0358437	0.0879736	0.204401	0.493096	0.136794	-0.145951	0.333799	0.218222	-0.358523	-0.772219	0.0853148	0.0157626	-0.0362028	-0.131478	blue	-0.364931	protein_coding
RBM6	68.3553	32.155	36.2003	-4.04536	0.232316	-0.218924	-0.251383	0.509986	0.244647	0.679495	0.62464	0.407444	0.466308	0.503471	0.373968	0.348404	0.553314	-0.24101	-0.329799	-0.239711	-0.743514	-0.617995	0.29657	brown	0.306141	protein_coding
SPATC1L	6.1756	1.32217	4.85343	-3.53126	0.00126935	-0.0573041	0.214714	0.112676	0.0552459	-0.0584705	-0.248149	0.183686	-0.0216574	0.362618	0.110782	0.0990832	-0.117193	0.0483534	-0.0803677	0.302709	0.0417972	0.306211	-0.203358	grey	-0.10148	protein_coding
ACTL6A	375.977	163.304	212.674	-49.37	0.867112	0.715187	0.720634	0.0677622	0.341249	-0.081227	-0.0985423	0.244012	0.445529	0.0568437	-0.0310757	0.43587	0.139278	-0.243449	-0.841335	0.108514	0.0406053	0.0456346	-0.220625	blue	-0.330667	protein_coding
CBX6	62.9857	30.2093	32.7764	-2.5672	-0.0195961	0.441357	0.308042	-0.213293	0.0177462	-0.575683	-0.318035	-0.474542	-0.314157	-0.405426	-0.596422	-0.392684	-0.389411	0.0591705	0.173254	-0.035293	0.721332	0.454749	-0.223199	brown	-0.351287	protein_coding
ALPK3	33.7365	2.61932	31.1172	-28.4978	0.0154389	0.399647	0.19952	-0.395222	-0.302988	-0.340115	-0.308962	-0.610596	-0.254342	-0.227317	-0.336358	-0.23014	-0.420057	0.300904	-0.0766781	0.0131193	0.656218	0.197682	-0.124643	greenyellow	-0.231627	protein_coding
DBN1	39.9643	6.72745	33.2369	-26.5094	0.431533	0.560387	0.559431	-0.0678643	0.292682	-0.136968	-0.129886	0.23708	0.610788	-0.130408	-0.34027	0.175134	-0.187397	-0.237193	-0.340733	0.276238	0.258269	0.311518	-0.202476	black	-0.433585	protein_coding
LPAR6	182.681	10.7723	171.909	-161.136	0.500099	-0.195148	0.0601223	0.551529	0.477691	0.45124	0.218133	0.393786	0.460237	0.518582	0.659796	0.814782	0.912633	-0.624466	-0.402292	0.0278278	-0.756852	-0.319688	-0.231522	lightgreen	0.579287	protein_coding
BIN2	80.8994	27.5214	53.378	-25.8567	-0.208548	-0.651355	-0.618237	0.0428497	-0.151767	0.590773	0.400052	0.182756	-0.00636594	0.217493	0.694456	0.260112	0.455486	-0.103785	0.109973	-0.119962	-0.680878	-0.446024	0.111808	red	0.593862	protein_coding
ADGRE5	95.856	49.4994	46.3566	3.14279	-0.238421	0.316533	0.29352	-0.477185	-0.241242	-0.49455	-0.389695	-0.343986	-0.438406	-0.393103	-0.525347	-0.508506	-0.729006	0.214136	0.29637	0.405904	0.82064	0.700225	-0.285166	brown	-0.472542	protein_coding
UGDH	179.883	94.6675	85.215	9.4525	0.777659	0.522097	0.376473	0.0759172	0.36767	0.176664	0.138069	0.27717	0.711613	-0.0308971	0.12192	0.536995	0.377185	-0.468757	-0.653771	0.074846	-0.221618	-0.214286	-0.178185	blue	-0.103363	protein_coding
HTRA3	18.1349	4.64312	13.4918	-8.84871	0.279549	0.230135	0.155395	0.217144	0.190651	0.145243	0.10649	0.176404	0.778702	0.236586	-0.0823311	0.224944	0.0902604	-0.0241414	-0.35747	-0.228387	-0.12893	-0.190492	0.239354	grey60	-0.0295186	protein_coding
TSHZ2	94.8575	6.17733	88.6801	-82.5028	0.319218	-0.197125	-0.0536582	0.155656	0.231518	0.370037	0.00742708	0.435324	0.768752	0.418064	0.567721	0.734405	0.580369	-0.268161	-0.39995	-0.0680648	-0.632362	-0.351434	-0.00842258	grey60	0.432622	protein_coding
FNBP1	31.038	15.0857	15.9523	-0.866634	-0.0617466	-0.118712	-0.393743	0.0821376	-0.12143	0.684133	0.757563	0.166253	0.0985736	-0.0439981	0.0862115	-0.0974606	0.0322518	-0.0796209	-0.0358704	0.0549384	-0.360063	-0.430073	0.278138	pink	-0.0479192	protein_coding
YY1AP1	36.2193	20.7111	15.5082	5.20293	0.247069	0.12384	-0.141999	0.225308	0.211204	0.555066	0.811732	0.0864863	-0.0370182	-0.0381373	-0.0294375	-0.0606547	0.219959	-0.382708	-0.151187	0.058316	-0.326043	-0.347306	0.023409	pink	-0.141218	protein_coding
ATF1	301.24	176.747	124.493	52.2545	0.907112	0.592492	0.797827	0.304474	0.645805	-0.136179	-0.0839447	0.285467	0.392459	0.240622	0.0183566	0.516961	0.40793	-0.612784	-0.676663	0.319621	-0.0515625	0.213104	-0.509558	blue	-0.204076	protein_coding
KCNMB1	193.939	87.531	106.408	-18.8768	-0.330344	0.37013	0.146545	-0.576668	-0.390319	-0.580903	-0.357382	-0.541877	-0.41971	-0.495995	-0.717238	-0.687637	-0.856484	0.528899	0.282998	-0.0712988	0.926676	0.446648	0.042055	brown	-0.516886	protein_coding
GRAMD2B	42.601	14.8465	27.7545	-12.908	0.448699	0.544684	0.165188	-0.0559451	0.146098	0.297798	0.535696	0.200978	0.331331	-0.410026	-0.284128	-0.0282211	-0.108373	-0.214952	-0.403855	0.028888	-0.0234773	-0.22812	0.0855368	blue	-0.551119	protein_coding
MORF4L2	34.376	14.3801	19.9959	-5.61578	0.145928	0.270076	-0.215678	0.0159774	-0.0145398	0.375144	0.730646	-0.0112267	0.0501634	-0.354777	-0.322256	-0.241101	-0.0541426	0.0225295	-0.229944	-0.502565	-0.088093	-0.489752	0.346984	pink	-0.3024	protein_coding
FOXF1	52.5164	9.36193	43.1544	-33.7925	0.270448	-0.179278	0.0525258	0.129426	0.19643	0.395894	0.113257	0.849259	0.510761	0.178978	0.382743	0.612909	0.386989	-0.31545	-0.385667	0.275666	-0.55018	-0.101343	-0.161198	greenyellow	0.0523122	protein_coding
SORL1	15.4238	3.93702	11.4868	-7.54974	0.0470999	0.248145	0.25308	-0.144807	0.0816544	-0.207885	-0.0856694	-0.297468	-0.506813	-0.173401	-0.204362	-0.242411	-0.24248	-0.190894	0.16591	0.50489	0.403095	0.442457	-0.457625	brown	-0.350913	protein_coding
RGCC	76.4151	33.5904	42.8246	-9.23421	0.0544056	-0.368995	-0.357348	0.273245	-0.0722797	0.594579	0.309706	0.520589	0.263566	0.126155	0.652912	0.420758	0.42575	-0.0752733	-0.220624	-0.0279171	-0.756728	-0.543254	0.258468	brown	0.276506	protein_coding
CWC22	197.293	93.2603	104.033	-10.7723	0.784778	0.564869	0.546748	0.180375	0.48109	-0.000541914	0.0916903	0.140611	0.506218	0.203353	-0.0559279	0.401039	0.322901	-0.369263	-0.732167	-0.0832361	-0.110631	-0.0916283	-0.168297	blue	-0.148173	protein_coding
TAF1A	72.932	41.3039	31.6281	9.67579	0.621092	0.365043	0.681205	0.330133	0.593844	-0.247005	-0.133434	0.178326	0.335956	0.454589	-0.0865992	0.322101	0.286177	-0.477298	-0.386989	0.338548	0.0320222	0.31202	-0.474649	blue	-0.142734	protein_coding
CHD1	203.875	58.9302	144.945	-86.0149	0.670404	0.254644	0.121798	0.11708	0.246898	0.543036	0.38261	0.294469	0.479192	0.0788786	0.337795	0.663111	0.539896	-0.421863	-0.738621	-0.0062851	-0.487224	-0.446225	-0.134765	blue	0.0601855	protein_coding
NEDD9	48.6049	13.858	34.7469	-20.8889	0.0552766	-0.283072	-0.330041	-0.0214615	-0.087861	0.537023	0.187117	0.364972	0.353963	-0.076491	0.533934	0.537258	0.386103	-0.148658	-0.240261	0.00756826	-0.585677	-0.387762	0.0358204	brown	0.299277	protein_coding
RAP2C	353.982	163.946	190.035	-26.0886	0.876126	0.485339	0.417926	0.178195	0.374695	0.204559	0.195317	0.302245	0.539238	0.0562695	0.228952	0.599379	0.500771	-0.417356	-0.82551	-0.0503823	-0.328013	-0.285676	-0.167437	blue	-0.0585302	protein_coding
PMP22	71.362	24.0852	47.2768	-23.1916	0.00749822	-0.421705	-0.521415	0.1717	0.043166	0.805651	0.808908	0.120225	0.0351639	0.2748	0.406247	0.246846	0.539594	-0.345693	-0.0815215	-0.0275153	-0.646731	-0.505971	-0.0400603	pink	0.413385	protein_coding
LAMTOR4	25.8318	5.51573	20.316	-14.8003	-0.0570121	-0.302343	0.0220889	0.716512	0.38115	0.00481123	0.0687633	0.123945	-0.209131	0.394591	0.196646	0.0244037	0.410432	-0.420811	0.339726	0.387349	-0.29369	0.128184	-0.165005	salmon	0.194637	protein_coding
IQCC	234.634	169.229	65.4051	103.824	-0.641526	-0.507116	-0.466338	-0.125187	-0.132973	-0.0859085	-0.035838	-0.150199	-0.417743	-0.210401	0.0274937	-0.362567	-0.093984	-0.0625475	0.804541	0.153282	0.0330543	0.181224	-0.102828	turquoise	0.197944	protein_coding
SPNS2	55.3873	16.3855	39.0018	-22.6163	-0.129516	-0.615251	-0.283604	-0.00600422	0.00902884	0.245582	-0.0485869	0.171476	-0.114227	0.306862	0.588488	0.503497	0.51324	-0.185884	0.0467333	-0.0299886	-0.440529	-0.0524043	-0.319584	green	0.654124	protein_coding
FGF1	28.6397	5.36739	23.2723	-17.9049	0.24124	0.529192	0.509107	-0.116552	-0.0703342	-0.440127	-0.457632	-0.0950221	0.0630993	-0.322412	-0.295949	-0.0422903	-0.309329	0.085467	-0.172141	0.291257	0.506944	0.299241	-0.0978455	black	-0.356734	protein_coding
PTN	25.2145	6.82175	18.3927	-11.571	0.30488	0.142576	0.0807081	0.0478857	-0.120624	0.376238	0.068121	0.217484	0.263973	-0.0661976	0.311599	0.441677	0.174326	-0.146263	-0.413883	0.287598	-0.185377	-0.16762	-0.0678822	green	0.0527861	protein_coding
MSN	35.6091	6.93045	28.6787	-21.7482	-0.185702	-0.409309	-0.557234	-0.0068282	-0.223363	0.814163	0.545795	0.202663	0.212717	0.105053	0.387546	0.250989	0.23958	-0.062577	-0.0101995	0.0510248	-0.532886	-0.517606	0.201019	lightcyan	0.322142	protein_coding
LRCH2	176.4	49.069	127.331	-78.2619	0.682372	0.910115	0.666287	0.0476359	0.310315	-0.312889	0.0128751	-0.149364	0.211143	-0.191422	-0.54373	-0.0853105	-0.163895	-0.0986224	-0.546453	-0.130918	0.421759	0.0429481	8.32398e-05	black	-0.59352	protein_coding
ADM5	35.7501	9.90298	25.8471	-15.9441	-0.0524704	-0.457738	0.0188978	0.272954	0.162919	0.0200597	-0.303557	0.0282324	0.00923315	0.816178	0.466327	0.44365	0.419615	-0.0847198	-0.0232991	0.0625539	-0.271878	0.134036	-0.292765	purple	0.579639	protein_coding
BBS12	277.867	126.403	151.464	-25.0607	0.829333	0.588205	0.710992	0.0984755	0.454882	-0.119547	-0.17275	0.290254	0.58642	0.180167	-0.00483258	0.534917	0.257982	-0.320098	-0.788086	0.051862	-0.0229477	0.0859781	-0.260403	blue	-0.184314	protein_coding
RCAN2	114.662	67.2189	47.4426	19.7762	-0.00468807	0.583523	0.379046	-0.435666	-0.177275	-0.576113	-0.395876	-0.541123	-0.281233	-0.399081	-0.625082	-0.470246	-0.65076	0.25248	0.116982	0.138746	0.873775	0.43545	-0.116366	brown	-0.507032	protein_coding
SAMHD1	27.6247	8.45692	19.1677	-10.7108	0.0717707	-0.311204	-0.284567	-0.171583	0.0629942	0.387614	0.16373	0.357129	0.260515	0.0256598	0.507077	0.424019	0.321644	-0.240787	-0.0818756	0.105834	-0.519681	-0.255497	-0.17254	brown	0.188951	protein_coding
CD8A	25.1821	11.4583	13.7237	-2.26537	-0.116659	-0.415821	-0.152612	0.185006	-0.201595	0.102272	-0.266828	0.502073	0.158731	0.24299	0.589086	0.338703	0.226981	0.193221	-0.0705293	-0.0300487	-0.446509	-0.185144	0.235029	red	0.415475	protein_coding
MTRES1	201.278	127.43	73.8481	53.5814	0.843287	0.607357	0.579671	0.311837	0.581575	-0.111765	0.0636796	0.0189865	0.39305	0.17165	-0.0879408	0.386782	0.427532	-0.459826	-0.646917	-0.235594	-0.0297293	-0.086802	-0.248144	blue	-0.104397	protein_coding
GCLM	112.232	44.7517	67.4802	-22.7285	0.660864	0.427889	0.308343	-0.0334786	0.277958	0.16392	0.258412	0.204711	0.420007	0.092319	-0.00954727	0.3626	0.250605	-0.234827	-0.697638	-0.273781	-0.122662	-0.196756	-0.13368	blue	-0.0821412	protein_coding
PPIF	128.384	48.7619	79.6226	-30.8607	0.188877	-0.461406	-0.0947981	0.118237	0.198769	0.339645	-0.0707908	0.268747	0.0720305	0.447426	0.76808	0.787519	0.73338	-0.428532	-0.224594	0.174513	-0.587242	-0.0871482	-0.4912	green	0.635701	protein_coding
MAP4K5	406.905	202.053	204.852	-2.79947	0.920333	0.688657	0.596673	0.0984673	0.400514	0.105198	0.151713	0.311048	0.49309	-0.0621275	-0.000604276	0.490813	0.286566	-0.416112	-0.839907	0.0897409	-0.106227	-0.135127	-0.212971	blue	-0.317153	protein_coding
COL4A1	47.0502	23.4793	23.5709	-0.0916525	-0.17588	0.125713	0.193322	-0.703326	-0.254949	-0.349702	-0.438556	-0.33839	-0.350118	-0.182449	-0.283675	-0.128418	-0.500185	0.186545	0.117833	0.318683	0.665166	0.579999	-0.526938	brown	-0.208944	protein_coding
TSEN15	169.565	21.3635	148.202	-126.838	0.763687	0.733344	0.804512	0.408839	0.651118	-0.290836	-0.0732781	0.24628	0.475593	-0.0372585	-0.313778	0.211676	0.136696	-0.450689	-0.493171	0.103633	0.107685	0.225314	-0.172544	magenta	-0.447767	protein_coding
UHMK1	98.494	16.4881	82.0059	-65.5179	0.375784	-0.2081	-0.0937495	0.189311	0.333732	0.70502	0.41925	0.294083	0.355507	0.482233	0.574601	0.705687	0.691952	-0.612595	-0.364375	0.190678	-0.626933	-0.292578	-0.392684	brown	0.44449	protein_coding
MED29	167.838	87.9279	79.91	8.01788	0.754521	0.651817	0.876921	0.143192	0.668909	-0.405406	-0.265096	0.113637	0.324633	0.145499	-0.238176	0.30635	0.148721	-0.546265	-0.461124	0.350217	0.251378	0.528838	-0.636501	blue	-0.35515	protein_coding
HACE1	274.742	125.153	149.59	-24.4372	0.840535	0.516168	0.450179	0.185355	0.429405	0.235556	0.326452	0.204314	0.331089	0.0761545	0.0474791	0.488962	0.428148	-0.455709	-0.799711	-0.00694159	-0.24575	-0.2084	-0.260972	blue	-0.155423	protein_coding
SCOC	209.999	40.3079	169.691	-129.383	0.760274	0.869341	0.646946	0.0580869	0.285716	-0.219872	0.05625	-0.0503058	0.26838	-0.158149	-0.398379	0.0275678	-0.0648496	-0.137147	-0.61909	-0.0350071	0.302038	-0.00160255	-0.0655402	black	-0.537137	protein_coding
THUMPD2	55.8747	11.0059	44.8687	-33.8628	0.461188	0.638995	0.6789	0.101418	0.284317	-0.416242	-0.310234	-0.221088	0.202606	0.144899	-0.32575	-0.00475495	-0.125749	-0.158936	-0.285524	0.154069	0.489149	0.409452	-0.260826	black	-0.232884	protein_coding
CASD1	45.3509	19.6628	25.6882	-6.0254	0.152378	-0.162847	-0.307971	0.359795	0.178929	0.71568	0.807735	0.20825	0.151748	0.322879	0.173897	0.135357	0.395604	-0.225778	-0.261806	-0.309368	-0.553896	-0.515831	0.193778	pink	0.14356	protein_coding
NACA	101.617	19.1023	82.5148	-63.4125	0.529463	0.126645	-0.061752	0.515796	0.373755	0.602094	0.775875	0.270318	0.254302	0.185244	0.208255	0.290893	0.583929	-0.411293	-0.494247	-0.296025	-0.615453	-0.587509	0.143966	pink	0.045628	protein_coding
MXRA7	147.723	64.1528	83.5705	-19.4177	-0.117141	0.5743	0.338385	-0.391673	-0.240861	-0.647559	-0.429995	-0.311364	-0.0869885	-0.581453	-0.753442	-0.584022	-0.785506	0.415073	0.162292	-0.0310825	0.859322	0.382222	0.186015	brown	-0.615116	protein_coding
LBP	12.1996	2.48908	9.7105	-7.22142	0.0818797	-0.244597	-0.0559167	0.0474293	0.0863339	0.0108541	-0.071404	-0.212088	-0.168688	0.507472	0.315997	0.272336	0.388529	-0.066592	-0.13004	-0.121211	-0.17769	-0.0310548	-0.300858	purple	0.42402	protein_coding
IDH1	180.634	39.6648	140.97	-101.305	0.575116	-0.0788899	0.181703	0.327211	0.319171	0.50088	0.216094	0.405311	0.434125	0.647292	0.638563	0.761815	0.669931	-0.427844	-0.639256	0.187648	-0.621719	-0.209599	-0.27672	green	0.388192	protein_coding
NUDT4	37.0001	8.65002	28.35	-19.7	0.237845	0.653889	0.360868	-0.208948	0.11724	-0.337565	-0.0285784	-0.0445128	0.0163252	-0.69473	-0.532171	-0.35402	-0.46386	0.0102066	-0.0519097	-0.0397019	0.422841	0.171113	0.102932	black	-0.737423	protein_coding
SH3KBP1	244.116	80.249	163.867	-83.6177	0.420647	-0.236165	-0.10039	0.121438	0.051172	0.687077	0.192405	0.400868	0.548724	0.512833	0.816167	0.902416	0.688238	-0.290398	-0.616431	0.029528	-0.70762	-0.454205	-0.123538	green	0.587205	protein_coding
RTN4	34.1275	18.3259	15.8016	2.52432	0.0546861	0.102598	-0.332226	0.0349861	-0.122565	0.624476	0.798937	0.0440199	-0.0617726	-0.317218	-0.0865431	-0.147979	0.014837	-0.09383	-0.120019	-0.0572573	-0.23657	-0.491964	0.262188	pink	-0.211061	protein_coding
ABLIM1	66.2272	6.57499	59.6522	-53.0772	0.380456	-0.0449633	0.0811312	0.193876	0.451795	0.356444	0.148268	0.475288	0.788564	0.275732	0.356947	0.627261	0.523	-0.601203	-0.24014	0.266058	-0.513001	-0.115665	-0.258927	grey60	0.204092	protein_coding
BAG2	36.5535	6.38325	30.1702	-23.787	0.0639328	0.546488	0.0426048	-0.247528	-0.201781	-0.112341	0.111739	-0.179725	0.176514	-0.606715	-0.552683	-0.394555	-0.480349	0.279626	-0.113195	-0.352969	0.406311	-0.187566	0.430043	black	-0.516233	protein_coding
TRPC1	129.321	36.187	93.1337	-56.9467	0.666846	0.859254	0.574666	0.0384092	0.401913	-0.194954	0.267686	-0.202522	0.0844069	-0.215351	-0.576169	-0.173491	-0.119111	-0.274171	-0.444576	-0.0592925	0.378228	0.0776043	-0.147933	black	-0.638121	protein_coding
CD48	92.7936	42.6045	50.1892	-7.58467	-0.00112112	-0.577846	-0.266612	0.428532	0.0825703	0.433453	0.0766044	0.165616	0.151955	0.771359	0.77486	0.518756	0.657421	-0.182509	-0.0928387	-0.0912393	-0.643915	-0.286192	-0.0120075	red	0.813736	protein_coding
FRZB	113.002	55.7004	57.3013	-1.60092	-0.0492585	0.531005	0.349443	-0.410382	-0.0886249	-0.66018	-0.342745	-0.600391	-0.267141	-0.409651	-0.701147	-0.543929	-0.624175	0.216342	0.210857	0.0556553	0.854408	0.457551	-0.125465	brown	-0.5004	protein_coding
ADCY4	79.5007	16.1256	63.3752	-47.2496	-0.227335	-0.732983	-0.351981	-0.0142113	0.0812384	0.339282	0.0103221	0.328195	0.0200131	0.411556	0.596906	0.51056	0.497814	-0.277927	0.151433	0.138275	-0.54706	-0.00179249	-0.367391	black	0.624596	protein_coding
ANP32E	301.498	156.248	145.249	10.9987	0.877746	0.660977	0.760715	0.299736	0.529139	-0.0821247	-0.0666883	0.161782	0.429208	0.288268	-0.0634761	0.478703	0.307781	-0.440088	-0.737863	0.192616	0.0307713	0.103533	-0.355735	blue	-0.198744	protein_coding
SRP72	297.327	166.198	131.129	35.0685	0.87189	0.659771	0.77074	0.338307	0.641754	-0.18336	0.0103902	0.294166	0.448346	0.212186	-0.183559	0.339646	0.259424	-0.404294	-0.719449	-0.0188413	-0.00922759	0.129654	-0.263924	blue	-0.354109	protein_coding
HRH1	37.3912	17.5171	19.8741	-2.35702	0.29435	-0.0840395	0.23319	0.0822679	0.192699	0.0353831	-0.290644	-0.0187949	0.197399	0.497734	0.391814	0.627947	0.484124	-0.359582	-0.236844	0.247486	-0.0844471	0.147979	-0.550218	green	0.483765	protein_coding
ZNF432	203.25	131.134	72.1161	59.0175	0.854818	0.53874	0.516814	0.439983	0.658006	-0.00314117	0.224996	0.12469	0.385782	0.188949	-0.0101013	0.37004	0.544034	-0.607341	-0.586535	-0.147642	-0.188254	-0.154731	-0.230286	blue	-0.0636849	protein_coding
MLF1	232.957	93.6415	139.316	-45.6744	0.761745	0.580163	0.684112	0.247512	0.348384	-0.0265514	-0.173211	0.510857	0.710718	0.149814	0.0110964	0.538007	0.175698	-0.259742	-0.748189	0.193671	-0.0640387	0.0149652	-0.099806	blue	-0.27204	protein_coding
C2orf76	193.245	89.1321	104.113	-14.9809	0.753516	0.329769	0.529382	0.625249	0.561085	0.0626655	0.0198371	0.577742	0.631277	0.34959	0.208079	0.560164	0.503382	-0.38309	-0.664822	-0.0919931	-0.41389	-0.157308	-0.00124227	blue	-0.047705	protein_coding
AGFG1	303.394	155.995	147.399	8.59657	0.866718	0.448672	0.381785	0.153771	0.48679	0.249322	0.280343	0.326331	0.510346	0.037628	0.218533	0.594753	0.539321	-0.585502	-0.73451	0.0213488	-0.353643	-0.228382	-0.30821	blue	-0.0710446	protein_coding
SMAD3	16.9247	2.65192	14.2728	-11.6209	-0.0293017	-0.166205	-0.368936	-0.415567	-0.219336	0.593491	0.514123	-0.00445063	0.0254762	-0.102573	0.140879	0.180158	0.0540634	-0.0593078	-0.206763	0.0136994	-0.198329	-0.235991	-0.190024	grey	0.0708486	protein_coding
ASF1A	126.31	23.2803	103.03	-79.7494	0.659696	0.712449	0.857582	0.343239	0.489381	-0.520221	-0.346336	-0.000655006	0.279103	0.124435	-0.343051	0.103878	0.0170787	-0.221663	-0.427362	0.0873701	0.332084	0.317641	-0.152164	magenta	-0.358273	protein_coding
ABR	68.3561	4.68182	63.6743	-58.9925	-0.179227	0.268279	0.386929	-0.308351	-0.153239	-0.669315	-0.585288	-0.360346	-0.57808	-0.313168	-0.417005	-0.408664	-0.573822	0.215932	0.23159	0.329755	0.748402	0.73986	-0.336857	midnightblue	-0.382527	protein_coding
MSRB3	148.928	82.4875	66.4402	16.0473	-0.00055072	0.613083	0.468714	-0.376911	-0.17919	-0.61925	-0.432506	-0.411692	-0.276129	-0.388256	-0.694592	-0.507148	-0.724984	0.317522	0.0742351	0.198239	0.911439	0.488917	-0.0627738	brown	-0.624098	protein_coding
YAP1	61.5199	24.5778	36.9422	-12.3644	0.189493	0.629254	0.431398	-0.184372	0.140492	-0.44046	-0.11631	-0.326789	-0.212555	-0.391328	-0.609609	-0.410041	-0.404229	-0.177046	0.144832	0.370915	0.688416	0.410429	-0.27964	brown	-0.597379	protein_coding
FAM174A	145.425	77.8386	67.5869	10.2517	0.739288	0.638499	0.539484	0.0950767	0.350798	-0.0743745	-0.0367513	0.093784	0.474754	0.0242124	-0.0534925	0.347242	0.163609	-0.253716	-0.611579	0.0406003	0.0134493	-0.0748156	-0.135346	blue	-0.26868	protein_coding
MOXD1	44.0235	13.2496	30.7739	-17.5242	0.28094	-0.0800202	0.183368	0.371481	0.169192	0.209628	-0.0391008	0.893174	0.486487	0.275829	0.350614	0.457455	0.281073	-0.0955885	-0.414256	0.108963	-0.506464	-0.163318	0.158545	greenyellow	0.00948488	protein_coding
VWF	61.1821	18.4031	42.779	-24.3759	-0.187253	-0.657908	-0.25164	-0.0712043	0.0206623	0.34521	-0.0311606	0.34301	0.0189133	0.416449	0.553969	0.54295	0.410132	-0.249676	0.0499446	0.337889	-0.457922	0.108716	-0.475905	green	0.52981	protein_coding
PDE1A	103.176	20.0388	83.1377	-63.0989	0.65825	0.599991	0.850604	0.186739	0.597446	-0.335286	-0.201038	0.219097	0.185016	0.184062	-0.257744	0.196666	0.0277325	-0.446992	-0.425726	0.420131	0.228955	0.480253	-0.481239	magenta	-0.456669	protein_coding
TMEM262	267.868	208.807	59.0615	149.745	-0.604653	-0.321567	-0.32478	-0.0295754	-0.0149853	-0.185722	0.00193276	-0.301215	-0.523403	-0.2604	-0.186143	-0.562028	-0.233589	-0.0842383	0.892552	0.252868	0.19608	0.268668	-0.0646909	turquoise	-0.0304469	protein_coding
ARMCX1	193.117	125.049	68.068	56.9813	0.836419	0.71421	0.707268	0.390413	0.681928	-0.210978	0.0282922	-0.0230715	0.383437	0.216288	-0.224964	0.244959	0.305771	-0.532698	-0.487516	0.0897072	0.0981502	0.0862706	-0.302767	blue	-0.286852	protein_coding
GGT5	38.3305	8.25063	30.0799	-21.8293	-0.229256	-0.585688	-0.200796	-0.20912	0.00137347	0.167675	-0.105291	0.0657054	-0.292896	0.413957	0.438444	0.342343	0.279705	-0.213236	0.173892	0.347124	-0.199207	0.284501	-0.632784	green	0.453418	protein_coding
KCNK6	54.0261	21.4762	32.5499	-11.0737	-0.165671	0.342709	-0.0421493	-0.53471	-0.339917	-0.15903	0.123588	-0.552667	-0.459228	-0.464177	-0.507581	-0.587381	-0.578361	0.234119	0.150934	-0.010455	0.664054	0.224582	-0.0863724	brown	-0.390104	protein_coding
TFAM	324.837	32.5441	292.293	-259.749	0.859769	0.382589	0.541641	0.450406	0.552593	0.186093	0.100058	0.389549	0.496551	0.332607	0.275994	0.695141	0.602956	-0.53369	-0.785162	0.0588254	-0.386653	-0.110248	-0.26182	green	0.048208	protein_coding
TAF9B	63.0246	14.7625	48.2621	-33.4996	0.368091	0.617304	0.791315	0.0651947	0.350828	-0.558189	-0.36748	0.10357	0.0199276	-0.0252751	-0.568953	-0.132208	-0.327579	-0.139584	-0.179985	0.422303	0.535635	0.5623	-0.28373	magenta	-0.622324	protein_coding
NSMCE4A	21.099	3.03888	18.0601	-15.0212	0.435214	0.459852	0.360251	0.226553	0.435259	-0.184038	0.184762	-0.0756251	-0.00666452	-0.0596648	-0.29848	-0.119497	0.0627232	-0.236725	-0.226156	-0.289523	0.0721133	0.0526354	-0.0529328	black	-0.242195	protein_coding
ARHGAP5	162.713	77.34	85.3728	-8.03279	0.728473	0.492625	0.214046	0.235478	0.338458	0.428791	0.641635	0.0965597	0.300771	0.0189303	-0.0420248	0.276603	0.399625	-0.4077	-0.677403	-0.068137	-0.290395	-0.462112	-0.0212698	blue	-0.176927	protein_coding
IL34	338.084	228.234	109.85	118.383	-0.741967	-0.512141	-0.516704	-0.0239198	-0.242007	-0.119799	-0.0371336	-0.31742	-0.581436	-0.213033	-0.014722	-0.510564	-0.161889	0.0964392	0.883708	0.09256	0.0835766	0.103393	0.106998	turquoise	0.219194	protein_coding
PDLIM4	45.3531	5.67813	39.675	-33.9968	0.229837	0.360791	0.680917	0.0247325	0.276345	-0.503839	-0.598988	0.123668	0.133712	0.0216276	-0.182485	0.124621	-0.175781	-0.283572	-0.00761247	0.649944	0.444249	0.760459	-0.511636	midnightblue	-0.282439	protein_coding
TNFRSF12A	69.2195	4.90833	64.3112	-59.4029	-0.438786	0.100823	0.0135643	-0.382782	-0.595564	-0.285988	-0.369736	-0.132035	-0.298348	-0.435614	-0.331244	-0.471715	-0.77205	0.581349	0.254791	0.263654	0.590403	0.328682	0.198556	lightgreen	-0.38913	protein_coding
WDYHV1	234.439	125.289	109.15	16.1388	0.845718	0.477703	0.579934	0.257764	0.554159	0.146502	0.17057	0.107659	0.310133	0.399043	0.108192	0.522963	0.458602	-0.560571	-0.687439	0.149123	-0.131458	0.0286076	-0.471946	blue	-0.0463803	protein_coding
TOP1	58.7643	24.2831	34.4812	-10.1981	-0.108881	-0.338984	-0.559462	0.153162	-0.00659361	0.745516	0.833092	0.157016	0.0150957	0.0254301	0.219073	0.0270727	0.308407	-0.231293	0.0420794	-0.014649	-0.571795	-0.523966	0.164198	pink	0.152785	protein_coding
NTF3	126.144	40.147	85.9968	-45.8498	-0.324307	0.211144	0.281306	-0.160018	-0.10066	-0.711143	-0.474043	-0.521803	-0.515398	-0.165145	-0.593335	-0.631185	-0.622525	0.273981	0.471817	0.243025	0.785712	0.626699	-0.140513	brown	-0.382333	protein_coding
IL6R	75.0245	3.89394	71.1306	-67.2366	0.257486	-0.349827	-0.117299	0.503484	0.43485	0.463587	0.445748	0.297654	0.0670273	0.562223	0.537938	0.407577	0.742801	-0.571323	-0.117794	0.178014	-0.717623	-0.247922	-0.237735	lightgreen	0.415001	protein_coding
DOHH	373.489	270.865	102.624	168.241	-0.714819	-0.418032	-0.392835	0.0300252	-0.0779849	-0.271928	-0.0860243	-0.283823	-0.517754	-0.210683	-0.221278	-0.585453	-0.231526	0.053532	0.943809	0.0797913	0.205267	0.229313	0.0550315	turquoise	0.0314793	protein_coding
CEBPB	19.838	3.49056	16.3475	-12.8569	-0.0577028	-0.0784981	-0.377955	-0.367137	-0.100365	0.261345	0.249885	-0.178382	-0.120807	-0.389148	0.204208	0.0214125	0.103058	-0.196729	0.140091	-0.0277663	-0.121165	-0.205032	-0.132795	grey	0.0754644	protein_coding
LILRB5	34.5728	14.1901	20.3828	-6.1927	-0.0449774	-0.474787	-0.36082	0.239177	-0.00804533	0.490668	0.214357	0.0916336	0.237042	0.582054	0.63477	0.365637	0.434493	-0.0347393	-0.0775144	-0.225318	-0.575553	-0.366717	0.143312	red	0.582561	protein_coding
FYB1	158.248	83.3264	74.9217	8.40473	-0.12339	-0.741264	-0.432463	0.174706	-0.0355731	0.537381	0.122053	0.232447	0.0394447	0.635409	0.900758	0.536286	0.593294	-0.13466	-0.0241779	-0.00708345	-0.73347	-0.283802	-0.0966086	red	0.779728	protein_coding
SEC14L1	100.549	22.1824	78.3668	-56.1844	0.392499	-0.131226	-0.0389685	0.110591	0.298733	0.482629	0.2152	0.538682	0.529158	0.131307	0.545129	0.71269	0.580985	-0.48507	-0.407794	0.0700078	-0.672878	-0.273586	-0.218352	brown	0.267546	protein_coding
EYA2	96.2313	24.6956	71.5357	-46.8402	0.316623	-0.326715	-0.102108	0.118449	0.318552	0.465793	0.221697	0.468629	0.448518	0.446186	0.644813	0.705938	0.674285	-0.486703	-0.298254	0.081818	-0.701159	-0.236324	-0.284778	brown	0.455725	protein_coding
SVIL	36.3007	4.68898	31.6117	-26.9227	-0.142051	0.252082	-0.219521	-0.169728	-0.325741	0.120502	0.490706	-0.332468	-0.316728	-0.436293	-0.515078	-0.561796	-0.41828	0.37783	-0.0116294	-0.349977	0.27874	-0.317666	0.425769	pink	-0.434187	protein_coding
MFHAS1	15.156	3.51183	11.6441	-8.13231	-0.0403686	-0.209068	-0.0978011	-0.15853	0.079678	0.113825	0.0895236	-0.196467	-0.405875	0.0587701	0.146326	0.157465	0.277542	-0.383419	0.134761	0.247936	0.0274035	0.229544	-0.634836	grey	0.282301	protein_coding
LRRC1	56.2887	18.0323	38.2564	-20.2241	0.138812	-0.33313	-0.279712	0.138211	0.254244	0.498601	0.414474	0.21686	-0.0446425	0.030932	0.501476	0.443805	0.62069	-0.580469	-0.0241418	0.160473	-0.582714	-0.208828	-0.36556	brown	0.323089	protein_coding
NIBAN1	152.2	73.4822	78.7173	-5.23513	-0.0413387	0.604751	0.310459	-0.337411	-0.113192	-0.502638	-0.197824	-0.602969	-0.243055	-0.358194	-0.762205	-0.622967	-0.698141	0.274931	0.153494	-0.0439257	0.872807	0.346159	0.0252221	brown	-0.560963	protein_coding
METTL18	110.748	61.4907	49.2575	12.2332	0.684296	0.406135	0.578997	0.628185	0.573175	-0.186241	-0.0449801	0.229202	0.295154	0.341713	-0.00878913	0.32876	0.455893	-0.30401	-0.575993	-0.212437	-0.192533	-0.061508	-0.0231222	blue	-0.0405401	protein_coding
IKBIP	145.817	36.7318	109.085	-72.3534	0.470722	-0.157079	0.0771067	0.606911	0.320861	0.463662	0.169072	0.370436	0.505563	0.61015	0.647167	0.743793	0.785311	-0.415884	-0.465945	0.0798429	-0.711282	-0.399902	-0.025974	green	0.534871	protein_coding
RAMP2	57.4279	26.9675	30.4605	-3.49296	0.202325	-0.229295	0.278135	0.0369236	0.15739	0.1342	-0.334123	0.490892	0.402985	0.575974	0.477571	0.696704	0.29586	-0.236517	-0.309731	0.547301	-0.278903	0.305705	-0.47001	green	0.270626	protein_coding
IGFBP7	7.65573	1.482	6.17374	-4.69174	0.0253764	0.148568	0.133657	-0.218602	-0.20005	0.136343	0.126906	-0.230047	-0.424959	-0.0644734	-0.155824	-0.0673054	-0.213907	0.0305407	-0.167349	0.343597	0.281434	0.243711	-0.293599	grey	-0.148871	protein_coding
CHST7	170.865	89.6662	81.1992	8.46692	0.550456	0.121437	0.334373	0.0602331	0.194773	0.227578	-0.116423	0.554117	0.777288	0.411207	0.391032	0.734269	0.34615	-0.155159	-0.760382	0.0567568	-0.382187	-0.0814019	-0.114091	turquoise	0.121475	protein_coding
CEMIP2	110.613	30.5989	80.0137	-49.4148	0.149428	-0.364255	-0.279747	0.0290402	-0.0792601	0.577726	0.115826	0.331566	0.316261	0.212025	0.745114	0.726618	0.582202	-0.20303	-0.357917	0.0722605	-0.671337	-0.416854	-0.0738272	green	0.539797	protein_coding
FAR1	254.34	133.097	121.244	11.8531	0.838327	0.493347	0.345164	0.331755	0.472084	0.369535	0.443586	0.26493	0.472272	0.0388613	0.104595	0.520686	0.516284	-0.548867	-0.703285	-0.0401384	-0.342051	-0.369523	-0.132279	blue	-0.119813	protein_coding
FRK	136.457	54.7994	81.6571	-26.8577	0.128142	0.761931	0.428894	-0.205877	-0.0635211	-0.497117	-0.192018	-0.488025	-0.0670015	-0.443183	-0.752757	-0.544459	-0.654169	0.231535	-0.00718049	-0.0030805	0.792529	0.285935	0.137944	brown	-0.658264	protein_coding
MAP3K1	90.3826	4.08688	86.2958	-82.2089	0.193737	-0.39247	-0.308278	0.384796	0.326126	0.697679	0.62706	0.260552	0.22836	0.526303	0.54238	0.435441	0.733122	-0.526411	-0.158344	-0.086521	-0.751056	-0.428567	-0.104834	lightcyan	0.551124	protein_coding
AL159141.1	19.5187	4.98703	14.5317	-9.54464	-0.229538	-0.323645	-0.197418	-0.433048	-0.271	-0.0240582	-0.347223	-0.352333	-0.405948	-0.0158588	0.463967	0.18739	0.0457868	0.0331588	0.202373	0.229736	0.054699	0.194956	-0.407737	red	0.384765	protein_coding
CAVIN1	61.6377	21.811	39.8267	-18.0156	-0.374751	0.0431509	0.162416	-0.497204	-0.394802	-0.461362	-0.527063	-0.173985	-0.456162	-0.296967	-0.291048	-0.375868	-0.637052	0.323703	0.32781	0.629728	0.615177	0.611641	-0.229873	brown	-0.344948	protein_coding
PLAGL1	25.1708	7.9823	17.1885	-9.20621	0.242547	0.259991	-0.180383	-0.0272229	-0.0880373	0.592007	0.612846	-0.126388	0.332538	-0.131378	-0.039609	0.110646	0.0800058	-0.0892609	-0.363409	-0.234286	-0.133402	-0.520771	0.230325	pink	-0.0239081	protein_coding
PRKACB	88.3793	33.8324	54.5469	-20.7145	0.595685	0.640277	0.640973	-0.182342	0.194097	-0.111437	-0.204419	-0.072297	0.261533	0.112123	-0.178145	0.267997	-0.0794193	-0.200687	-0.554923	0.321314	0.365089	0.276606	-0.411002	blue	-0.27865	protein_coding
KANK4	14.4239	6.21146	8.21244	-2.00098	0.154427	0.0016022	0.0535812	0.152447	0.098828	0.258867	0.186535	0.750978	0.481676	0.0907774	0.0149649	0.214061	0.0359492	0.00111688	-0.315609	-0.0658604	-0.299244	-0.193461	0.192925	greenyellow	-0.211809	protein_coding
SPAG1	154.278	73.9352	80.3432	-6.40798	0.685479	0.593889	0.557275	-0.0511662	0.149194	-0.00860345	-0.0755696	0.305164	0.459136	-0.148878	-0.0302248	0.415808	0.0424083	-0.147721	-0.723766	0.0668944	0.0410199	-0.0142793	-0.0872433	turquoise	-0.285499	protein_coding
MYO18B	109.57	35.8243	73.746	-37.9217	-0.0925101	0.531205	0.26853	-0.246828	-0.16036	-0.495497	-0.0981738	-0.393213	-0.224931	-0.437223	-0.772784	-0.699741	-0.714725	0.384512	0.101996	-0.172832	0.748094	0.328531	0.204108	red	-0.635414	protein_coding
GCC2	205.931	129.912	76.0187	53.8933	0.844381	0.498047	0.444674	0.289826	0.572601	0.0487987	0.192187	0.136818	0.39137	0.174979	0.077512	0.460276	0.545055	-0.537969	-0.632626	-0.090935	-0.224171	-0.205253	-0.27459	blue	-0.0731887	protein_coding
ITPR1	24.8975	13.9462	10.9514	2.9948	-0.00851126	-0.00459211	-0.324383	0.204262	0.0967053	0.378049	0.737143	-0.385725	-0.222053	0.0968793	-0.206897	-0.256516	0.204718	-0.169878	0.0678522	-0.331723	-0.104193	-0.424665	0.125288	pink	0.103686	protein_coding
FN1	21.8696	3.68465	18.1849	-14.5003	-0.118046	-0.118677	0.150031	-0.256757	-0.196326	-0.42289	-0.618012	-0.245404	-0.446447	-0.00612832	0.158643	0.109842	-0.0296666	0.108112	0.134467	0.20474	0.32615	0.39208	-0.412736	grey	0.242867	protein_coding
PRICKLE1	78.906	10.3407	68.5653	-58.2247	0.492199	0.0142209	0.374596	0.586037	0.470455	0.108372	-0.0209113	0.826157	0.53156	0.390753	0.32787	0.537962	0.480823	-0.347673	-0.451952	0.167329	-0.550197	-0.0717603	-0.0394982	greenyellow	0.0102364	protein_coding
TMA16	314.439	163.012	151.427	11.5846	0.869249	0.718294	0.736548	0.323971	0.459763	-0.111487	-0.00801419	0.230162	0.476816	0.084884	-0.14292	0.36691	0.217368	-0.320056	-0.756802	0.090588	-0.00162332	-0.0332283	-0.126768	blue	-0.33816	protein_coding
CSF3R	31.847	11.3763	20.4707	-9.09437	-0.459405	-0.369778	-0.573705	-0.434661	-0.435221	0.244226	0.19973	-0.0755301	-0.111929	-0.162402	0.16258	-0.264505	-0.232968	0.31125	0.326304	-0.206593	-0.0719611	-0.214589	0.288851	blue	0.141614	protein_coding
USP15	38.6809	14.4822	24.1987	-9.71653	0.396435	0.130783	0.181218	0.267126	0.172348	0.452403	0.228414	0.243992	0.418191	0.439212	0.284429	0.42246	0.255123	-0.194398	-0.518633	0.115995	-0.343765	-0.1975	0.0291368	turquoise	0.10665	protein_coding
CAMSAP2	153.26	33.5675	119.693	-86.1255	0.738747	0.846775	0.619496	0.134119	0.4195	-0.0835269	0.202376	0.0533211	0.299451	-0.253371	-0.438389	0.0515889	-0.00417975	-0.382499	-0.518061	0.222017	0.195169	0.00353295	-0.124964	black	-0.608122	protein_coding
NR2F1	105.949	21.9556	83.993	-62.0374	0.371757	-0.259005	0.0975762	0.312957	0.481	0.435127	0.122689	0.6848	0.454917	0.529156	0.583272	0.758627	0.667827	-0.60031	-0.320874	0.294433	-0.662315	-0.0624718	-0.412284	brown	0.333818	protein_coding
NCS1	148.332	58.5219	89.8105	-31.2886	-0.402107	0.250118	0.141669	-0.473498	-0.398882	-0.629459	-0.495765	-0.473629	-0.575616	-0.576265	-0.57595	-0.649152	-0.778402	0.449215	0.424563	0.207403	0.843828	0.534302	-0.0183899	brown	-0.469876	protein_coding
GLMP	76.027	10.8905	65.1365	-54.2461	0.270637	-0.288391	0.203196	0.300251	0.249211	0.0861152	-0.28931	0.11885	0.196253	0.79924	0.649663	0.677893	0.572374	-0.252803	-0.325076	0.195592	-0.388249	0.133909	-0.415908	purple	0.57972	protein_coding
DEPTOR	177.973	8.61055	169.362	-160.752	0.353787	-0.398802	-0.0492842	0.44246	0.360931	0.421477	0.120949	0.378236	0.351541	0.709863	0.758967	0.787892	0.86077	-0.40391	-0.383691	-0.0877368	-0.797464	-0.370771	-0.183591	lightgreen	0.666111	protein_coding
HCFC1R1	102.343	21.7259	80.6167	-58.8909	-0.512551	-0.0400104	0.102195	-0.302143	-0.397787	-0.451547	-0.515453	-0.226566	-0.405876	-0.113208	-0.336219	-0.473424	-0.695115	0.452808	0.436858	0.416802	0.625073	0.571034	-0.0330417	brown	-0.262798	protein_coding
MYOZ1	73.3938	26.1478	47.246	-21.0982	0.170188	0.58363	0.653568	-0.0459796	0.187618	-0.777748	-0.506116	-0.310203	-0.137252	-0.154164	-0.60358	-0.374069	-0.426111	0.108213	0.00829791	0.0870575	0.715247	0.616345	-0.151409	brown	-0.452639	protein_coding
NUDT21	253.774	128.385	125.389	2.99639	0.815325	0.717686	0.936476	0.293427	0.631793	-0.384614	-0.32136	0.27575	0.474987	0.17184	-0.210425	0.368306	0.135166	-0.414003	-0.613236	0.264871	0.167819	0.385542	-0.381889	blue	-0.38848	protein_coding
SEMA3G	47.9809	24.9385	23.0424	1.89605	0.129353	-0.327128	-0.0185714	-0.0800567	0.216546	0.205616	-0.122485	0.536642	0.333862	0.135957	0.476658	0.668019	0.455868	-0.437643	-0.0993049	0.319426	-0.415566	0.0619032	-0.477326	green	0.273721	protein_coding
FCMR	56.6881	15.3068	41.3813	-26.0746	0.107421	-0.413464	-0.0544223	0.340887	0.244085	0.350053	0.0430428	0.196877	0.228848	0.874028	0.615336	0.495333	0.535042	-0.294276	-0.127546	0.157445	-0.49481	-0.0454439	-0.259962	purple	0.594466	protein_coding
FMOD	41.7576	22.3488	19.4088	2.94004	-0.0375678	0.418521	0.199771	-0.50098	-0.109319	-0.464816	-0.299717	-0.520222	-0.141876	-0.443313	-0.430306	-0.358651	-0.432401	0.0328317	0.224285	0.131307	0.68083	0.400556	-0.221845	brown	-0.267087	protein_coding
CLIC6	63.8613	17.4582	46.4032	-28.945	0.116077	-0.448344	-0.0768687	0.282557	0.265634	0.140513	-0.132628	0.361761	0.233083	0.592365	0.665888	0.543589	0.613113	-0.256827	-0.109917	-0.0288705	-0.606736	-0.114354	-0.167275	brown	0.554258	protein_coding
RB1CC1	103.499	55.0996	48.3994	6.70022	0.656343	0.347932	0.0810212	0.416544	0.462783	0.348373	0.613183	0.149379	0.317345	-0.025246	0.0741	0.254971	0.560292	-0.551108	-0.428102	-0.136765	-0.439191	-0.514389	0.0035509	blue	-0.0791611	protein_coding
NT5E	191.184	21.2055	169.979	-148.773	0.761039	0.723617	0.826425	0.261732	0.488257	-0.319634	-0.260606	0.163811	0.543477	0.211433	-0.202035	0.270663	0.067324	-0.247444	-0.620015	0.0832398	0.179679	0.217306	-0.152735	magenta	-0.332039	protein_coding
AMY1B	79.6113	24.1649	55.4464	-31.2814	0.507225	0.118264	0.0779453	0.415383	0.651238	0.364922	0.647848	0.296896	0.26354	0.154693	0.0818296	0.245946	0.563652	-0.722314	-0.243303	-0.0204126	-0.493371	-0.216534	-0.243437	yellow	-0.046092	protein_coding
SUSD1	104.896	49.34	55.5564	-6.21637	0.129305	-0.403835	-0.211977	-0.0563623	-0.186551	0.489798	-0.0450536	0.419017	0.210324	0.227442	0.815747	0.746601	0.485558	-0.100374	-0.336424	0.109033	-0.55263	-0.305185	-0.143581	red	0.523043	protein_coding
MFSD5	73.9319	35.0036	38.9283	-3.9247	0.241247	-0.234705	0.169786	-0.19618	0.0607267	0.130323	-0.367032	0.363117	0.330598	0.375108	0.61596	0.763557	0.371566	-0.249978	-0.36478	0.407365	-0.292737	0.20196	-0.546993	green	0.404607	protein_coding
PKN2	227.02	105.065	121.955	-16.8907	0.801665	0.641505	0.537802	0.0580291	0.361973	0.168013	0.255797	0.131962	0.270857	0.0767598	-0.0866514	0.326975	0.162667	-0.371411	-0.752761	0.18575	-0.00894213	-0.0394337	-0.310631	blue	-0.389335	protein_coding
ZNF415	144.612	19.6084	125.004	-105.395	0.68478	0.58836	0.833995	0.125454	0.445365	-0.336656	-0.358709	0.221366	0.475734	0.343849	-0.148253	0.323262	0.0330657	-0.240046	-0.583635	0.222318	0.217179	0.383244	-0.333575	magenta	-0.26592	protein_coding
SERF2	27.5817	2.56798	25.0137	-22.4457	0.121392	0.230046	0.373446	0.20173	0.539617	-0.456427	0.000772601	0.0797588	-0.0934573	0.0264372	-0.528702	-0.306101	-0.0854232	-0.297096	0.175778	0.00207692	0.274902	0.423866	-0.271281	grey	-0.405137	protein_coding
WASF3	25.5229	5.17115	20.3518	-15.1806	0.317032	0.529305	0.322221	0.0461207	0.348548	-0.196016	0.181083	0.0652708	0.201569	-0.379178	-0.480831	-0.240478	-0.215905	-0.125771	-0.183558	-0.125509	0.136009	0.0808753	0.0832131	black	-0.627338	protein_coding
EID1	187.425	45.2231	142.202	-96.9789	0.73561	0.884703	0.778326	-0.0394106	0.386655	-0.415612	-0.179727	-0.144497	0.265688	-0.0980627	-0.435967	0.0537505	-0.103779	-0.233342	-0.509811	0.0751324	0.455822	0.267459	-0.282625	black	-0.488693	protein_coding
ANGPT2	17.0577	6.51995	10.5378	-4.01784	-0.0777274	-0.378216	0.0294989	0.00811078	0.024946	-0.0466122	-0.478408	0.200715	0.161896	0.33585	0.413195	0.488899	0.2789	-0.0287628	-0.0102509	0.176	-0.236314	0.123235	-0.203926	green	0.468832	protein_coding
FBXL7	34.789	14.7574	20.0316	-5.27425	0.106893	-0.172207	-0.353734	0.0432342	0.0104828	0.76456	0.745205	0.194427	0.0990107	0.118671	0.244149	0.188454	0.312502	-0.335484	-0.145817	0.127476	-0.441013	-0.405597	-0.0785907	pink	0.145412	protein_coding
ZFP36L2	47.2455	14.1929	33.0526	-18.8596	-0.402929	-0.441796	-0.319643	-0.350596	-0.228959	0.115364	-0.0484411	-0.20558	-0.517588	-0.0953226	0.282862	-0.0189135	-0.0105596	-0.152692	0.438453	0.575029	0.0167557	0.314975	-0.507169	blue	0.205374	protein_coding
GNE	192.435	105.573	86.8625	18.7103	0.794401	0.476407	0.289115	0.101293	0.473124	0.267351	0.331988	0.161102	0.554313	0.0191904	0.116489	0.508429	0.481196	-0.551428	-0.642611	-0.128422	-0.263515	-0.302852	-0.235669	blue	-0.0918007	protein_coding
DUSP10	136.742	69.0506	67.6914	1.35916	0.00442736	-0.542155	-0.344799	0.115607	-0.0773256	0.552997	0.0892611	0.444538	0.157239	0.157814	0.865205	0.640578	0.560842	-0.241422	-0.116215	0.195975	-0.729198	-0.32014	-0.092525	red	0.558339	protein_coding
FNIP2	62.4361	7.23152	55.2046	-47.9731	-0.117065	-0.465868	-0.676071	-0.011595	-0.300627	0.831137	0.572532	0.00377795	0.065027	0.153442	0.638191	0.297059	0.388565	-0.0313874	-0.106888	-0.204489	-0.607151	-0.664326	0.195086	lightcyan	0.528744	protein_coding
C1QTNF1	51.0683	3.97372	47.0946	-43.1208	-0.475003	-0.264636	-0.261835	-0.498382	-0.45068	-0.122471	-0.192799	-0.45641	-0.749146	-0.283593	0.0145797	-0.264213	-0.302276	0.186094	0.445388	0.423021	0.336648	0.315029	-0.340567	grey60	0.0277158	protein_coding
DDX60	202.42	75.1203	127.299	-52.1791	0.715106	0.27493	0.42317	0.400912	0.353974	0.246951	0.0170442	0.395365	0.505243	0.328207	0.350594	0.71619	0.529117	-0.373871	-0.703375	0.183673	-0.395842	-0.218544	-0.153863	turquoise	0.0871608	protein_coding
FCGRT	116.111	8.14787	107.964	-99.8157	-0.0496736	-0.650034	-0.209041	0.214103	0.157714	0.344552	-0.0774939	0.2229	0.114274	0.674981	0.812898	0.609096	0.633899	-0.36359	0.0603409	0.373751	-0.610562	0.0170792	-0.402638	purple	0.708885	protein_coding
CST3	14.8144	4.93478	9.8796	-4.94482	-0.15951	-0.0404847	-0.193983	-0.279023	-0.0258242	-0.0420709	0.264363	0.0552588	-0.170785	-0.363797	-0.222288	-0.347868	-0.222778	0.058887	0.150206	-0.282248	0.0493667	0.0253761	0.0440184	green	-0.252977	protein_coding
DEPP1	20.2135	2.0776	18.1359	-16.0583	-0.17256	-0.349661	-0.0421798	-0.0891515	-0.0759188	-0.148966	-0.369864	-0.239604	-0.482836	0.223499	0.347337	0.189034	0.23223	-0.113166	0.22146	0.364627	0.0137594	0.245904	-0.465263	green	0.414798	protein_coding
QSER1	129.023	31.6116	97.4116	-65.8	0.546571	-0.00511121	-0.016217	0.295381	0.369501	0.538324	0.34851	0.238588	0.442654	0.324782	0.518742	0.716694	0.773169	-0.541601	-0.50286	-0.190928	-0.589427	-0.457754	-0.174263	green	0.421974	protein_coding
PHEX	28.0276	10.1201	17.9075	-7.78734	0.326466	0.149105	0.260809	0.138199	0.1459	0.141149	-0.0263545	0.81604	0.526506	0.0509193	0.0588133	0.377661	0.0931128	-0.0877887	-0.430256	0.0891505	-0.221425	-0.077334	0.0637669	greenyellow	-0.236814	protein_coding
ATMIN	131.786	75.8337	55.9522	19.8815	0.748497	0.6212	0.662966	0.0975941	0.660621	-0.190437	0.0276473	0.0182409	0.207339	0.0279371	-0.244187	0.283764	0.233468	-0.609795	-0.438421	0.146622	0.16876	0.267786	-0.59864	blue	-0.32447	protein_coding
COL5A1	28.964	9.78272	19.1812	-9.39852	0.233335	-0.0196033	0.104269	-0.154917	-0.0968456	0.239239	-0.102626	-0.115704	0.16351	0.314022	0.344142	0.539649	0.225691	-0.0669101	-0.422682	0.0466538	-0.0308228	0.0361279	-0.353564	green	0.37386	protein_coding
TGFB1I1	155.425	83.897	71.5281	12.3689	-0.282467	0.351589	0.171557	-0.672466	-0.38214	-0.532973	-0.367608	-0.625714	-0.449845	-0.390491	-0.628623	-0.589278	-0.793563	0.44649	0.236867	0.0406733	0.928081	0.508145	-0.128639	brown	-0.414282	protein_coding
PSD3	89.7841	18.3258	71.4583	-53.1325	0.337175	-0.162169	-0.106418	0.164075	0.117693	0.571762	0.22778	0.48635	0.667866	0.363996	0.632621	0.676779	0.526331	-0.245713	-0.489459	-0.172824	-0.633235	-0.398924	0.0530316	brown	0.437377	protein_coding
PLPPR3	323.953	251.095	72.8587	178.236	-0.615646	-0.251525	-0.188294	-0.0275753	-0.0140053	-0.427709	-0.211848	-0.271675	-0.506295	-0.270301	-0.316467	-0.593753	-0.332352	-0.0106224	0.933129	0.284337	0.36289	0.444976	-0.117499	turquoise	-0.115769	protein_coding
SRPK3	209.479	53.4284	156.051	-102.623	-0.508907	0.18692	0.083221	-0.263931	-0.35864	-0.684773	-0.439438	-0.48497	-0.551306	-0.490988	-0.632968	-0.80886	-0.792969	0.529339	0.550002	0.0526666	0.805222	0.496878	0.178299	green	-0.446072	protein_coding
ITPKB	40.6525	14.5282	26.1243	-11.5961	-0.0723482	-0.537148	-0.420638	0.299544	0.0733863	0.618922	0.438984	0.222572	-0.00432353	0.34614	0.545326	0.355469	0.535247	-0.289533	0.0659828	-0.0141206	-0.611114	-0.354247	-0.0704629	brown	0.495367	protein_coding
TEAD3	125.665	61.9576	63.707	-1.74941	-0.153505	0.470612	0.206473	-0.511491	-0.168078	-0.552939	-0.247715	-0.646254	-0.481679	-0.56162	-0.655035	-0.629227	-0.669305	0.189927	0.30216	0.0657059	0.864557	0.489567	-0.187669	brown	-0.510629	protein_coding
C1S	61.2629	27.4941	33.7688	-6.27475	0.35472	-0.0662125	0.436955	0.136229	0.331061	-0.115578	-0.487914	0.263709	0.333143	0.622027	0.391635	0.684415	0.398477	-0.270572	-0.336966	0.315066	-0.184014	0.229303	-0.463246	green	0.318213	protein_coding
LPP	27.2694	12.4163	14.8531	-2.4368	-0.17602	-0.0915082	-0.474439	-0.127036	-0.134543	0.554807	0.727272	-0.133245	-0.167578	-0.270021	-0.118128	-0.231595	-0.0567126	-0.0863905	0.118591	-0.0792706	-0.133759	-0.337413	0.0921737	pink	-0.133616	protein_coding
EIF2S3	142.343	96.0615	46.282	49.7795	0.795013	0.528144	0.501647	0.258136	0.588388	-0.0532586	0.0643876	-0.0600871	0.247935	0.147223	0.0670803	0.39291	0.463007	-0.606196	-0.468028	0.0897803	-0.0433048	-0.00874342	-0.434419	blue	-0.102807	protein_coding
CARD16	160.286	35.2701	125.015	-89.7453	0.234091	-0.346257	-0.205509	0.191248	-0.107288	0.590626	0.105284	0.414244	0.411873	0.425625	0.81416	0.751389	0.586207	-0.0323233	-0.51612	-0.117684	-0.72693	-0.545807	0.133152	brown	0.56595	protein_coding
TMEM9B	195.669	63.2572	132.412	-69.1551	0.619646	-0.00403138	0.284019	0.416822	0.531949	0.283998	0.00647273	0.643267	0.660475	0.337837	0.574602	0.857263	0.742266	-0.643089	-0.480811	0.235081	-0.63736	-0.133206	-0.324697	green	0.269708	protein_coding
DUSP23	91.3547	9.48592	81.8688	-72.3828	0.0692765	-0.562013	-0.0804837	0.364086	0.297582	0.226669	-0.0711339	0.153973	0.0430988	0.746057	0.671976	0.638133	0.757339	-0.393283	-0.0686273	0.10272	-0.574657	0.00584967	-0.407052	purple	0.775751	protein_coding
TRMT10C	164.528	89.1813	75.3471	13.8343	0.777105	0.382899	0.541034	0.435991	0.689294	-0.0862456	-0.0901954	0.211704	0.556362	0.283147	0.15624	0.615963	0.624822	-0.648684	-0.512053	0.00667457	-0.225143	0.0183515	-0.405729	blue	0.0876556	protein_coding
PPFIBP1	115.086	23.8034	91.2829	-67.4794	0.59305	0.772538	0.672635	-0.0578373	0.0870371	-0.34587	-0.273635	-0.104534	0.185444	-0.184406	-0.318491	0.0910475	-0.182057	0.0229875	-0.548603	0.152721	0.421384	0.153632	-0.0855221	black	-0.476047	protein_coding
SUSD2	20.2254	6.80385	13.4216	-6.61774	-0.0969645	0.0125343	0.14573	-0.404776	-0.0610976	-0.415962	-0.43426	-0.24646	-0.302229	-0.0730636	-0.155863	-0.0187113	-0.163917	0.0937549	0.0746356	-0.00304249	0.426433	0.414288	-0.424539	brown	-0.0182258	protein_coding
TNFRSF17	42.7192	19.7922	22.9271	-3.13489	0.232586	-0.207379	0.206751	0.445239	0.479741	0.138293	0.0033369	0.035907	0.173261	0.931006	0.336749	0.407802	0.518418	-0.422586	-0.140414	0.1899	-0.300098	0.171362	-0.404835	purple	0.471648	protein_coding
NAP1L1	180.951	28.9018	152.049	-123.147	0.807057	0.798139	0.601922	0.329631	0.563519	-0.0925589	0.215025	0.25002	0.38144	-0.240675	-0.303258	0.113735	0.15344	-0.472567	-0.523358	0.044621	0.01358	-0.0711041	-0.0571766	black	-0.578799	protein_coding
LOX	54.5375	19.1348	35.4027	-16.2679	0.517626	0.281125	0.47567	0.0373864	0.327685	-0.0986385	-0.243763	0.000551627	0.464977	0.446565	0.129796	0.498043	0.227872	-0.212023	-0.51909	0.00977959	0.0143583	0.143763	-0.358681	turquoise	0.0835603	protein_coding
G3BP2	149.579	23.0089	126.57	-103.561	0.732787	0.611809	0.83518	0.153727	0.569314	-0.286673	-0.287338	0.219036	0.417707	0.152564	-0.156787	0.413398	0.159011	-0.550809	-0.457683	0.592125	0.18741	0.435591	-0.570337	magenta	-0.337795	protein_coding
PLXDC1	142.401	54.1081	88.2928	-34.1848	0.407723	-0.189894	0.120697	0.257352	0.266291	0.371865	-0.0662903	0.465082	0.652079	0.649365	0.663535	0.815456	0.599735	-0.282503	-0.485792	0.0945252	-0.616435	-0.221331	-0.139138	green	0.455193	protein_coding
ARRB2	112.89	50.7163	62.1735	-11.4573	-0.133155	-0.59847	-0.640521	0.0103844	-0.261372	0.764572	0.441746	0.217608	0.0733472	0.235888	0.801296	0.371523	0.455695	-0.0639623	-0.0632082	-0.0753286	-0.73181	-0.555041	0.141291	red	0.594948	protein_coding
SUSD6	89.3659	31.5402	57.8257	-26.2854	0.413673	-0.15047	0.0688676	0.178128	0.338058	0.254928	-0.0330555	0.0357639	0.122982	0.394229	0.631919	0.732286	0.748221	-0.5836	-0.276395	0.187616	-0.412118	-0.101439	-0.570196	green	0.528474	protein_coding
CRIP2	49.1327	25.4958	23.6369	1.85885	0.114903	0.438107	0.528594	-0.339606	0.0355739	-0.477175	-0.473286	-0.169224	-0.0734865	-0.181457	-0.389796	-0.128657	-0.408551	-0.0784939	0.0652402	0.56051	0.675525	0.64489	-0.447611	brown	-0.412843	protein_coding
CD80	53.835	33.4916	20.3434	13.1482	-0.150523	-0.486168	-0.381086	-0.157987	-0.414054	0.447634	-0.0915403	0.0902766	-0.059249	0.125021	0.761263	0.501446	0.296923	0.150803	-0.148238	-0.101098	-0.395401	-0.303671	0.0400781	red	0.635828	protein_coding
NEURL2	39.7648	14.9979	24.767	-9.7691	0.0870937	-0.375139	0.0586281	0.051115	0.0999661	0.127305	-0.170653	-0.0297265	-0.120495	0.595991	0.49039	0.543206	0.46296	-0.250174	-0.156717	0.239223	-0.226701	0.218738	-0.581089	green	0.568863	protein_coding
TENT2	81.2119	27.1656	54.0462	-26.8806	0.174307	-0.270865	-0.432485	0.190437	0.00945863	0.897413	0.844252	0.111297	0.0990075	0.357461	0.426412	0.327326	0.523163	-0.266718	-0.332419	-0.122409	-0.644145	-0.635444	0.0446086	pink	0.359626	protein_coding
NSD3	79.7385	25.9441	53.7944	-27.8503	0.0967938	-0.291124	-0.497482	0.334153	-0.0225895	0.776542	0.850909	0.132132	0.0575376	0.236731	0.331525	0.179863	0.521571	-0.115807	-0.266371	-0.412881	-0.680961	-0.773291	0.345667	pink	0.351059	protein_coding
RGN	109.545	56.4361	53.1088	3.32734	0.169302	0.676237	0.538652	-0.339277	0.0236193	-0.610543	-0.359856	-0.520395	-0.189471	-0.331294	-0.659721	-0.373858	-0.542088	0.0949775	0.000751097	0.109375	0.845322	0.503861	-0.250765	brown	-0.521209	protein_coding
TMEM17	106.484	8.31704	98.1667	-89.8497	0.496878	0.101519	0.389378	0.383066	0.317844	0.183834	-0.0840287	0.40913	0.65816	0.730836	0.285085	0.589775	0.36737	-0.135131	-0.628561	-0.00266028	-0.325561	-0.0773577	-0.0201259	purple	0.16988	protein_coding
GLIPR1	114.572	33.6433	80.9291	-47.2858	0.37771	0.849581	0.601836	-0.0853298	0.111933	-0.44985	-0.193811	-0.272125	0.196076	-0.302102	-0.633894	-0.308382	-0.483143	0.0977427	-0.246306	-0.0426212	0.652874	0.262228	0.0729335	black	-0.614354	protein_coding
FUCA1	93.392	52.9502	40.4418	12.5084	0.0420901	-0.470079	-0.136953	0.16293	-0.0080933	0.344951	-0.155921	0.220051	0.208862	0.504334	0.832264	0.620704	0.506607	-0.177127	-0.134995	0.260278	-0.558006	-0.0755041	-0.211855	red	0.638706	protein_coding
MAGT1	167.07	89.3093	77.7604	11.5489	0.757311	0.664403	0.725494	0.153436	0.434202	-0.116831	-0.10711	0.14843	0.458774	0.154635	-0.0946055	0.327069	0.0906378	-0.387575	-0.55109	0.384428	0.125302	0.211695	-0.335401	blue	-0.337425	protein_coding
SLAMF7	49.8395	18.1543	31.6852	-13.531	0.0452508	-0.438888	-0.0476448	0.304959	0.130381	0.327516	0.0116332	0.136834	0.139234	0.918986	0.532964	0.466188	0.483302	-0.145849	-0.174843	0.0642335	-0.412231	-0.0504906	-0.174121	purple	0.649825	protein_coding
GAS6	45.4075	23.2254	22.1821	1.04335	-0.131465	0.341451	0.284348	-0.417393	-0.216302	-0.52768	-0.46146	-0.293232	-0.181405	-0.504242	-0.386052	-0.340707	-0.546139	0.138611	0.252255	0.377891	0.673699	0.557248	-0.203837	brown	-0.358961	protein_coding
PNN	81.2889	17.0455	64.2434	-47.1978	0.62003	0.730285	0.447173	0.208462	0.394544	0.00781839	0.332436	0.0668595	0.156254	-0.374818	-0.398042	-0.0167193	0.00901779	-0.324208	-0.464552	-0.0590096	0.107665	-0.0934337	0.00700655	black	-0.613713	protein_coding
PUS7	152.688	22.0024	130.686	-108.684	0.736367	0.346682	0.406779	0.297284	0.575622	0.205314	0.264088	0.480919	0.36607	0.00617282	0.138427	0.530134	0.514218	-0.644408	-0.589326	0.114999	-0.35932	-0.0557081	-0.354769	yellow	-0.140243	protein_coding
HSPA4	38.7467	13.8778	24.8688	-10.991	0.456299	0.483586	0.377387	-0.0988795	0.0869233	0.0106139	-0.133865	0.0914502	0.370936	-0.246019	-0.100323	0.379713	0.040217	-0.193356	-0.457386	0.0852787	0.179485	0.0363481	-0.195195	blue	-0.176933	protein_coding
TMEM14A	110.654	65.0202	45.6335	19.3867	0.704475	0.677729	0.584091	0.349951	0.418206	-0.119823	0.0504056	0.0481304	0.33452	0.0278182	-0.216729	0.168362	0.151037	-0.321959	-0.447428	0.0424206	0.125045	-0.0593102	-0.0522252	blue	-0.319185	protein_coding
TUBA4A	69.4892	27.9002	41.589	-13.6888	0.0861059	0.560514	0.388819	0.0366929	0.221716	-0.589196	-0.103011	-0.343523	-0.124852	-0.448011	-0.735853	-0.52605	-0.377474	-0.0380635	0.177786	-0.103112	0.620928	0.394866	-0.0270471	red	-0.521165	protein_coding
ZNF140	263.378	151.742	111.636	40.1061	0.868253	0.50365	0.663662	0.449431	0.644976	-0.0478187	0.0259681	0.207679	0.452625	0.466082	0.0451568	0.490675	0.462927	-0.464775	-0.695721	0.0247454	-0.168447	-0.0306693	-0.272898	blue	-0.116243	protein_coding
PACSIN3	101.747	17.3243	84.4227	-67.0984	-0.242994	0.289557	0.32095	-0.0853602	0.129653	-0.754342	-0.458597	-0.229997	-0.224381	-0.293611	-0.627948	-0.616642	-0.575247	0.0676293	0.563265	0.138558	0.693451	0.630125	-0.0693179	green	-0.45563	protein_coding
CAB39L	45.1175	7.69712	37.4204	-29.7233	0.232679	0.603388	0.577181	-0.0377079	0.30403	-0.474508	-0.276956	0.24467	0.450096	-0.237404	-0.625661	-0.231361	-0.455254	-0.0217047	-0.0845087	0.117948	0.436053	0.392036	0.0702996	black	-0.665582	protein_coding
TENT5A	99.5522	60.8312	38.7209	22.1103	0.685683	0.46251	0.252632	-0.0391927	0.322294	0.153705	0.26002	-0.112811	0.250292	-0.0478024	0.0323448	0.396636	0.394853	-0.446339	-0.538159	-0.106648	-0.0695902	-0.236665	-0.330845	blue	-0.0317422	protein_coding
FAM210A	137.936	50.2477	87.6885	-37.4407	0.651712	0.131902	0.295867	0.530049	0.406351	0.207516	0.153576	0.215527	0.405243	0.561031	0.378573	0.569434	0.629145	-0.306006	-0.659265	-0.190415	-0.482259	-0.324448	-0.0439528	blue	0.26905	protein_coding
TLCD3B	371.348	263.282	108.066	155.216	-0.734729	-0.443316	-0.443933	-0.131198	-0.159208	-0.213474	-0.110557	-0.384663	-0.4681	-0.222795	-0.114669	-0.538475	-0.266996	0.0640252	0.926509	0.0894661	0.203025	0.250334	0.0128419	turquoise	0.129266	protein_coding
MOCS2	178.983	23.8855	155.097	-131.212	0.721463	0.884895	0.821214	0.306104	0.485018	-0.415823	-0.129466	0.160074	0.367052	-0.170656	-0.48404	-0.0231992	-0.0999459	-0.237188	-0.483295	0.0177358	0.315456	0.20531	-0.0153227	magenta	-0.626531	protein_coding
UEVLD	233.698	26.4935	207.204	-180.711	0.798999	0.717386	0.878013	0.181573	0.489067	-0.369199	-0.323501	0.203183	0.418983	0.136817	-0.177573	0.333002	0.0856439	-0.265134	-0.654659	0.0793827	0.205508	0.266095	-0.256205	magenta	-0.339931	protein_coding
METTL25	160.238	102.787	57.451	45.336	0.803511	0.473235	0.541976	0.473057	0.724331	0.0017854	0.189075	0.160787	0.487243	0.349364	-0.0287111	0.407605	0.515283	-0.630953	-0.485272	-0.0275347	-0.172925	-0.0923234	-0.261368	blue	-0.0600781	protein_coding
DENND4A	285.269	150.545	134.724	15.8211	0.768344	0.369781	0.397901	0.227252	0.308262	0.206469	0.0923646	0.407835	0.625314	0.269713	0.23747	0.631535	0.431193	-0.236935	-0.84403	-0.129857	-0.373808	-0.304135	-0.0289987	turquoise	0.0198037	protein_coding
HEY1	42.3431	18.6405	23.7026	-5.06207	0.27888	-0.115232	0.0395956	-0.0385718	0.193504	0.271138	0.0169903	0.477614	0.234424	-0.0933634	0.40834	0.629149	0.428635	-0.433949	-0.255411	0.253229	-0.39303	-0.0187815	-0.412922	green	0.126589	protein_coding
C1orf115	84.3233	35.5923	48.731	-13.1387	0.391629	-0.178612	0.337818	0.209625	0.367049	0.122225	-0.201294	0.38347	0.339933	0.69397	0.485235	0.749564	0.546952	-0.411884	-0.402417	0.322746	-0.359854	0.170063	-0.523455	green	0.39066	protein_coding
WFS1	179.591	91.6582	87.9332	3.72506	-0.158216	0.49233	0.405301	-0.460763	-0.133233	-0.631841	-0.410291	-0.462297	-0.321948	-0.398437	-0.739394	-0.583081	-0.798127	0.226934	0.271067	0.312841	0.949851	0.695902	-0.2309	brown	-0.62258	protein_coding
UTRN	17.3322	3.78707	13.5451	-9.75805	0.114867	0.149784	0.45048	-0.149824	-0.0305172	-0.157263	-0.366141	0.153238	-0.139279	0.119604	-0.0898291	0.17087	-0.177739	-0.0116611	-0.204995	0.690806	0.266306	0.446734	-0.399741	magenta	-0.226212	protein_coding
EMILIN1	62.8751	33.1673	29.7079	3.45938	-0.221728	0.177323	0.162692	-0.477749	-0.146902	-0.48463	-0.433602	-0.623357	-0.397405	-0.133968	-0.392472	-0.305099	-0.425808	0.126594	0.316767	0.127285	0.750167	0.553913	-0.406238	brown	-0.105536	protein_coding
PDLIM5	113.664	39.6247	74.0395	-34.4148	0.611474	0.681959	0.594983	0.00737746	0.121671	-0.0187544	-0.0705176	0.143238	0.290324	-0.164225	-0.197546	0.266825	-0.0889526	-0.154968	-0.609004	0.300721	0.255381	0.115537	-0.185464	blue	-0.458292	protein_coding
FAM107A	26.366	10.1527	16.2134	-6.06071	-0.119253	-0.376777	-0.398933	-0.0265218	0.0772636	0.473707	0.348952	0.38242	0.416231	0.0759677	0.29938	0.247586	0.247942	-0.185293	0.0200987	-0.0977854	-0.537803	-0.25453	0.0657752	brown	0.215447	protein_coding
COPG1	30.2401	7.18866	23.0514	-15.8628	-0.192596	-0.186083	0.082781	-0.113296	0.0402579	-0.140316	-0.277936	-0.0106495	-0.208708	-0.00205623	0.106959	0.0244423	-0.0508225	-0.301029	0.400925	0.858129	0.136386	0.536136	-0.524467	cyan	0.0133941	protein_coding
CANX	23.7092	9.90965	13.7995	-3.88986	0.0144739	-0.0197193	0.374191	0.0523255	0.136369	-0.189753	-0.327698	0.190936	-0.0856819	0.220217	0.0124242	0.095359	-0.0798335	-0.238308	0.113064	0.910957	0.14139	0.542269	-0.46444	cyan	-0.131297	protein_coding
MRGPRF	40.3243	16.1979	24.1264	-7.92842	-0.183162	0.144686	0.165369	-0.401268	-0.0401679	-0.334345	-0.124537	-0.337268	-0.360398	-0.118167	-0.472353	-0.385835	-0.435375	0.00907129	0.314919	0.230006	0.631031	0.519762	-0.377693	brown	-0.241561	protein_coding
FBXO6	156.843	99.4653	57.378	42.0873	0.517974	0.202132	0.372898	-0.104436	-0.0111848	0.274988	-0.127677	0.300321	0.483443	0.387904	0.332133	0.676753	0.189098	-0.0408145	-0.76823	0.234276	-0.154646	-0.0387024	-0.18997	turquoise	0.0977823	protein_coding
BST2	57.0612	18.401	38.6602	-20.2593	-0.121293	-0.577524	-0.247609	0.275435	-0.0407864	0.466314	0.0272118	0.327999	0.165997	0.538626	0.658393	0.529763	0.462947	-0.181516	0.00491686	0.310364	-0.542841	-0.176646	-0.0821436	red	0.585952	protein_coding
QPCT	68.5873	31.0956	37.4917	-6.39614	0.626494	0.212204	0.289779	0.28795	0.398642	0.165738	0.106387	0.440445	0.533612	0.168467	0.348045	0.505866	0.468603	-0.420285	-0.459162	0.0465494	-0.420235	-0.245295	-0.0620807	blue	0.0483868	protein_coding
SDF2L1	16.7915	1.85118	14.9404	-13.0892	0.182536	-0.0433607	0.0417294	0.364117	0.108883	0.479253	0.286559	0.390108	0.254923	0.329041	0.227343	0.279023	0.207799	-0.223777	-0.225974	0.300068	-0.341406	-0.169872	0.0495812	grey	0.045194	protein_coding
LCN2	25.9359	8.827	17.1089	-8.28187	-0.202528	0.16682	-0.185602	-0.391343	-0.221609	-0.054311	0.237157	-0.188525	-0.135872	-0.427684	-0.396732	-0.547297	-0.473128	0.213348	0.27344	-0.126334	0.321586	-0.0517182	0.240844	green	-0.393304	protein_coding
CTDSPL2	116.873	55.0003	61.8724	-6.87216	0.655165	0.521724	0.873511	0.343683	0.613022	-0.408385	-0.363041	0.370161	0.432801	0.240827	-0.18086	0.348747	0.152062	-0.397068	-0.493495	0.364395	0.0902564	0.457427	-0.374281	blue	-0.31701	protein_coding
SEMA4B	31.3794	8.38463	22.9948	-14.6101	-0.239681	-0.562894	-0.244666	-0.178317	-0.0551347	0.0713335	-0.193587	-0.135924	-0.352763	0.332531	0.452186	0.333093	0.315104	-0.0810228	0.162758	0.0233057	-0.169502	0.123569	-0.441666	green	0.572324	protein_coding
HES4	142.993	21.5327	121.46	-99.9276	-0.416181	0.183475	0.166902	-0.251149	-0.114239	-0.589684	-0.365076	-0.261587	-0.444908	-0.484655	-0.647453	-0.636006	-0.698051	0.20984	0.578114	0.208522	0.752124	0.604904	-0.0902165	green	-0.534632	protein_coding
ADGRE2	96.3056	49.4412	46.8643	2.57689	-0.00106094	-0.50497	-0.292509	-0.0883419	-0.175825	0.492457	-0.0441987	0.54568	0.255779	0.211259	0.815484	0.670857	0.428244	-0.0765123	-0.212213	0.0831962	-0.611077	-0.256896	-0.0999346	red	0.528636	protein_coding
CUL4B	144.109	76.7535	67.3559	9.39765	0.748257	0.652736	0.828676	0.138453	0.555819	-0.378466	-0.227932	0.0787574	0.183819	0.159888	-0.225577	0.263318	0.151217	-0.429241	-0.52339	0.295128	0.228729	0.35108	-0.481244	blue	-0.332561	protein_coding
COPA	56.9494	14.4649	42.4845	-28.0196	0.466334	0.482307	0.783507	0.120567	0.385631	-0.577874	-0.564846	0.0928729	0.0848716	0.0417344	-0.217264	0.204376	-0.0278281	-0.195691	-0.334427	0.165321	0.368761	0.540591	-0.425212	magenta	-0.267481	protein_coding
ZBTB10	100.973	29.4369	71.5361	-42.0992	0.532839	0.830155	0.628257	-0.118499	0.158374	-0.263503	-0.0581335	-0.0947622	0.0767395	-0.402766	-0.526722	-0.0873425	-0.326261	-0.0833017	-0.446882	0.229606	0.481325	0.194342	-0.14638	black	-0.708704	protein_coding
ARHGAP1	39.9278	19.4816	20.4461	-0.964509	-0.0855991	0.212831	0.336363	-0.545223	-0.259197	-0.487304	-0.603588	-0.39615	-0.352507	-0.177576	-0.209596	-0.104525	-0.444953	0.231563	0.0418734	0.418281	0.655846	0.604389	-0.398486	brown	-0.190868	protein_coding
ACTG2	195.854	80.408	115.446	-35.038	-0.304863	0.38013	0.188599	-0.508028	-0.272004	-0.696983	-0.418965	-0.477665	-0.375288	-0.537994	-0.758197	-0.698668	-0.810688	0.462309	0.355003	-0.0904002	0.904042	0.461678	0.0488491	brown	-0.54188	protein_coding
ERLIN2	58.1264	19.1249	39.0015	-19.8766	0.403601	0.555945	0.680103	-0.0754866	0.0927398	-0.296307	-0.288908	0.0679496	0.0911793	0.115563	-0.316594	0.0133747	-0.327218	0.079934	-0.477176	0.377329	0.390007	0.414441	-0.204463	turquoise	-0.495716	protein_coding
TIAM1	117.349	38.9018	78.4474	-39.5456	0.00669301	-0.617428	-0.248647	0.106259	0.0969731	0.379565	-0.0400687	0.326586	0.0988303	0.448281	0.749231	0.729816	0.683617	-0.311483	-0.103843	0.118882	-0.640072	-0.152904	-0.379528	green	0.690457	protein_coding
MYO1B	256.1	139.25	116.85	22.4003	0.857883	0.792124	0.61752	0.155073	0.422441	0.0423725	0.22722	0.111169	0.432178	-0.0570773	-0.240262	0.254362	0.138955	-0.388439	-0.714843	0.102251	0.0848142	-0.0795761	-0.178498	blue	-0.459182	protein_coding
YBEY	26.0284	11.2291	14.7994	-3.57031	-0.334638	-0.353161	-0.08471	0.210039	0.181558	-0.0268644	0.0292819	-0.0859706	-0.270699	0.437737	0.00214313	-0.231741	-0.0238196	-0.114358	0.450212	0.308259	-0.0333076	0.306954	-0.207836	turquoise	0.0898048	protein_coding
WDFY2	26.2519	14.6572	11.5946	3.06263	-0.0477248	-0.0844682	-0.340312	0.167984	0.0656467	0.5026	0.750813	0.0648858	-0.0302546	-0.0435949	-0.0259234	-0.230277	0.0722674	-0.182083	0.0667494	-0.188271	-0.296948	-0.322871	0.217597	pink	-0.0212603	protein_coding
H4C3	31.0886	4.00981	27.0788	-23.069	-0.30626	-0.377989	-0.381741	0.641868	0.0306617	0.225253	0.402503	-0.0312646	-0.280101	0.203791	0.0548342	-0.27302	0.219907	0.0718791	0.306861	-0.348156	-0.345911	-0.361172	0.466033	salmon	0.23306	protein_coding
CAND2	78.2767	29.2528	49.0239	-19.7711	0.297209	0.713179	0.538815	-0.456603	0.0594023	-0.465923	-0.268791	-0.248099	-0.0577038	-0.472348	-0.614863	-0.195226	-0.465254	-0.0167588	-0.208763	0.0933876	0.72179	0.473354	-0.340078	brown	-0.57803	protein_coding
RUBCNL	114.763	12.1543	102.609	-90.4544	0.208552	-0.458137	-0.0290924	0.295997	0.227827	0.311505	-0.0554399	0.145573	0.0914341	0.796213	0.786905	0.698134	0.728231	-0.341752	-0.25094	0.107475	-0.581389	-0.0744086	-0.396734	purple	0.767483	protein_coding
ETS1	99.7921	30.9779	68.8142	-37.8363	0.244781	-0.364742	-0.200347	0.323499	0.140109	0.734377	0.421878	0.483165	0.205858	0.459748	0.641041	0.689993	0.695675	-0.41842	-0.365766	0.215131	-0.736136	-0.40872	-0.18349	brown	0.452758	protein_coding
PGM2L1	75.4617	11.7254	63.7363	-52.0109	0.587588	0.245977	0.171147	0.193562	0.297754	0.30086	0.207417	0.132387	0.234107	-0.0253441	0.376491	0.514994	0.531711	-0.604948	-0.367897	0.263119	-0.289066	-0.190094	-0.355678	green	0.0952038	protein_coding
SRPK2	170.598	15.4951	155.103	-139.608	0.728897	0.522869	0.761284	0.267071	0.477077	-0.0886849	-0.147656	0.421289	0.540377	0.309351	-0.0418775	0.462494	0.193112	-0.377993	-0.659023	0.424536	-0.0437638	0.205993	-0.276135	magenta	-0.241475	protein_coding
ERO1A	49.494	13.809	35.685	-21.8759	0.306895	-0.259866	-0.147488	0.154844	0.0791381	0.423111	0.253103	0.141932	0.0541137	0.362918	0.615689	0.545525	0.583535	-0.217725	-0.380294	-0.0710187	-0.547483	-0.382303	-0.196452	red	0.391334	protein_coding
ITPKC	19.3961	5.69578	13.7003	-8.00451	-0.27511	-0.210586	-0.307141	-0.403172	-0.191375	-0.0160504	-0.160896	-0.328937	-0.177536	-0.268999	0.198761	0.0120446	-0.0224915	-0.0393482	0.297816	0.0694231	0.0546735	0.0665002	-0.200812	turquoise	0.207407	protein_coding
NTN1	119.588	46.6286	72.9599	-26.3313	-0.177066	0.434733	0.203705	-0.403553	-0.176232	-0.617064	-0.262628	-0.466637	-0.445325	-0.613573	-0.696501	-0.673066	-0.712304	0.338417	0.27847	-0.069147	0.803296	0.416034	-0.0291401	brown	-0.635376	protein_coding
CD44	43.2124	9.82071	33.3917	-23.571	-0.256667	-0.0293375	0.316232	-0.286107	-0.167881	-0.458189	-0.684898	-0.063399	-0.19206	0.12445	-0.0556474	-0.125154	-0.477243	0.231112	0.219281	0.541443	0.45127	0.708055	-0.300212	pink	-0.109829	protein_coding
CTR9	216.079	110.351	105.728	4.62291	0.801325	0.35324	0.364643	0.259883	0.521127	0.18062	0.126661	0.271308	0.487972	0.112333	0.297938	0.664523	0.646124	-0.643855	-0.596751	0.127908	-0.37212	-0.201021	-0.355705	blue	0.057459	protein_coding
MAN1C1	130.386	59.9514	70.4343	-10.4829	0.455332	-0.120945	0.154388	0.141246	0.253504	0.239361	-0.162395	0.188478	0.474052	0.558881	0.605701	0.857966	0.672544	-0.311827	-0.529504	-0.0120119	-0.464746	-0.164063	-0.321432	green	0.542102	protein_coding
[truncated: 9,596 more rows]
